# Supplementary material for: Structural insights into lipid membrane binding by human ferlins
Source: Springer Nature journal article supplement (doi:10.1038/s44318-025-00463-8), 2025-05-28
Supplement: MOESM1 [file 44318_2025_463_moesm1_esm.pdf › 44318_2025_463_moesm1_esm.pdf]

# Appendix

for “Structural insights into lipid membrane binding by human ferlins”

## Table of Contents

|                           |    |
|---------------------------|----|
| Appendix Figure S1 .....  | 2  |
| Appendix Figure S2 .....  | 4  |
| Appendix Figure S3 .....  | 6  |
| Appendix Figure S4 .....  | 8  |
| Appendix Figure S5 .....  | 10 |
| Appendix Figure S6 .....  | 12 |
| Appendix Figure S7 .....  | 14 |
| Appendix Figure S8 .....  | 16 |
| Appendix Figure S9 .....  | 18 |
| Appendix Figure S10 ..... | 20 |
| Appendix Figure S11 ..... | 22 |
| Appendix Figure S12 ..... | 24 |
| Appendix Figure S13 ..... | 26 |
| Appendix Figure S14 ..... | 28 |
| Appendix Figure S15 ..... | 30 |
| Appendix Table S1 .....   | 32 |
| Appendix Table S2 .....   | 33 |
| Appendix Table S3 .....   | 34 |
| Appendix Table S4 .....   | 35 |
| Appendix Table S5 .....   | 36 |
| Appendix Table S6 .....   | 37 |
| Appendix Table S7 .....   | 38 |
| References .....          | 38 |

## Appendix Figure S1

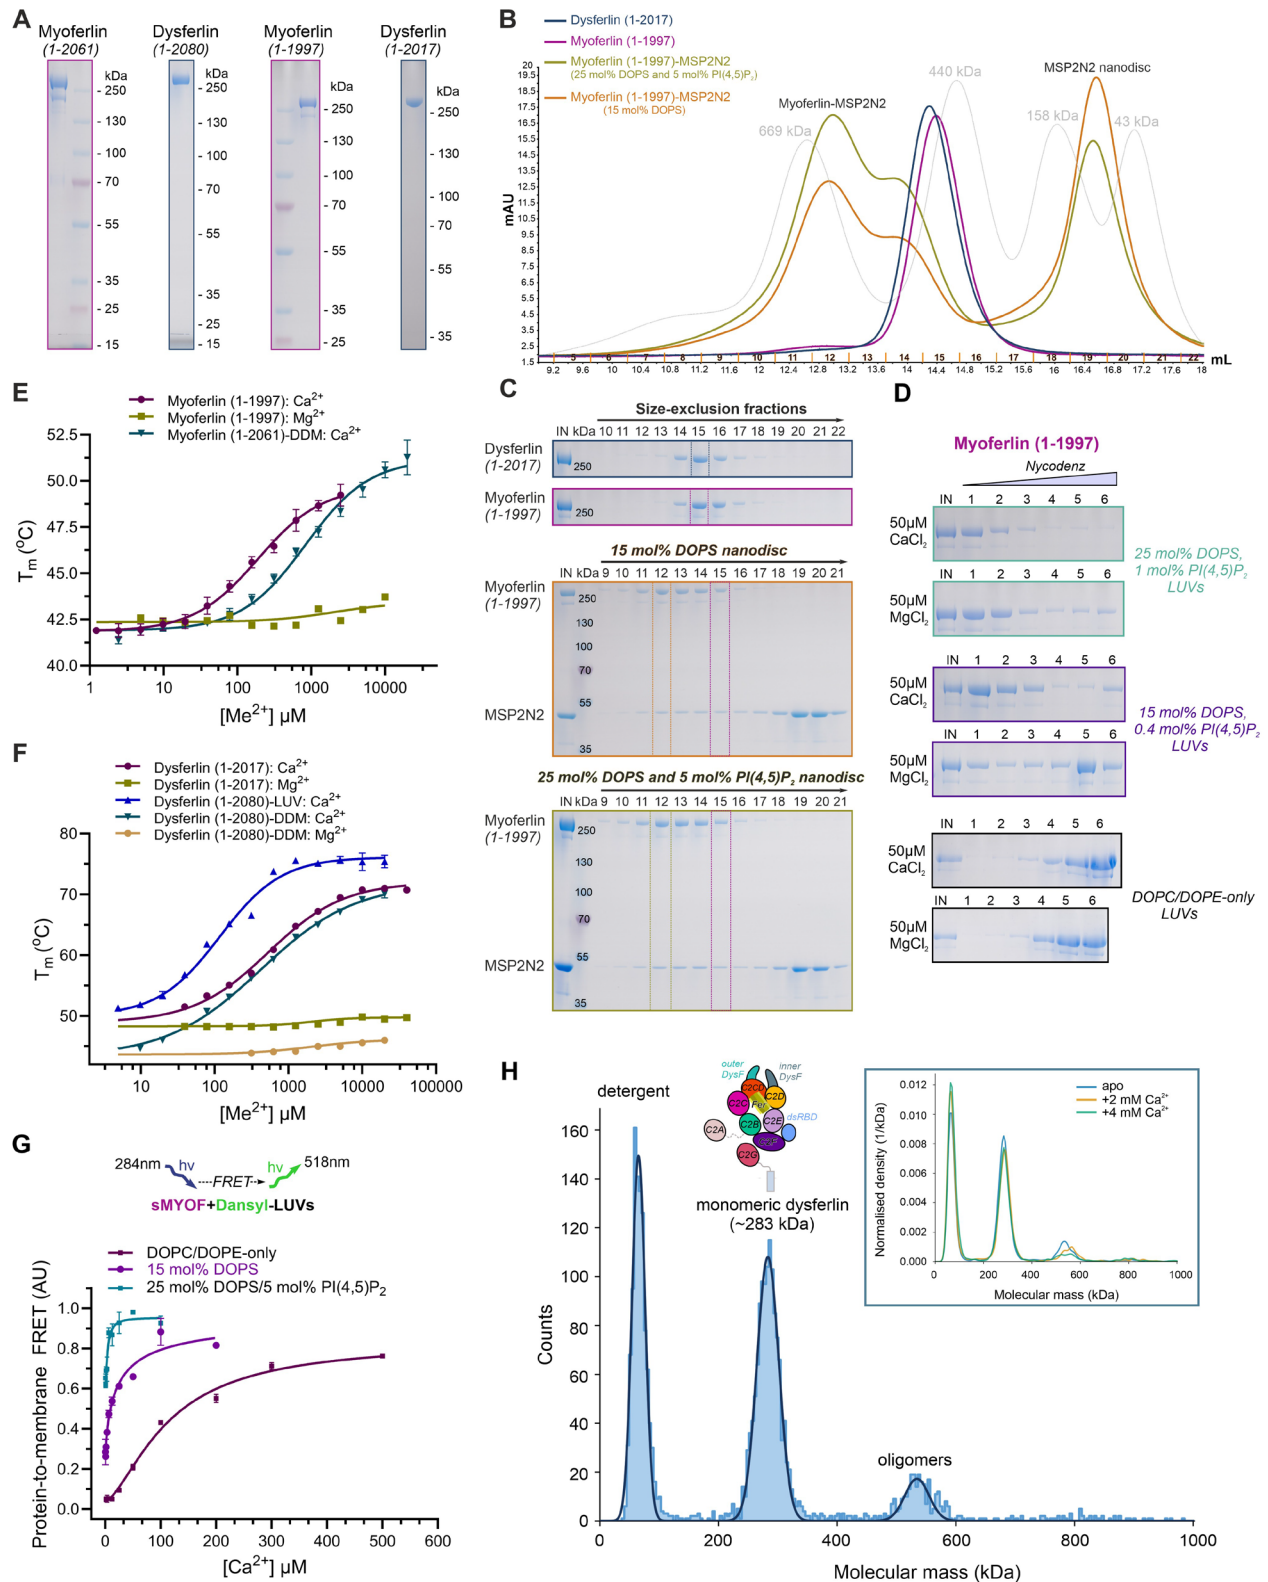



## Appendix Figure S1. Biochemical characterization of human myoferlin and dysferlin.

**A** SDS-PAGE analysis of purified myoferlin and dysferlin constructs, used for structural and functional studies.

**B** Size-exclusion chromatography (SEC) elution profile of the soluble myoferlin (residues 1-1997, sMYOF), soluble dysferlin (residues 1-2017, sDYSF), and the reconstituted myoferlin (1-1997)-MSP2N2 complexes. MSP2N2-based nanodiscs, comprising 15 mol% DOPS or 25 mol% DOPS and 5 mol% PI(4,5)P<sub>2</sub> anionic phospholipids, were purified through SEC prior to the assembly of their complexes with sMYOF. Gel filtration standards (grey) were applied to the Superose 6 column in the same buffer and their molecular masses are indicated.

**C** SDS-PAGE analysis of the size-exclusion chromatography peak fractions from B. To enable compact visualization of the myoferlin (1-1997) and dysferlin (1-2017) fractions, the top two gels were cropped (see also S1A and Source Data).

**D** Ca<sup>2+</sup>-sensitive liposome binding activity of soluble myoferlin (1-1997) using a coflotation assay. Myoferlin-liposome (large unilamellar vesicles, LUVs) complexes were assembled *in vitro* in the presence of 50 μM Ca<sup>2+</sup> or Mg<sup>2+</sup> and subjected to ultracentrifugation on a Nycodenz step gradient (0%/30%/40%). The Nycodenz gradients were harvested from the top. The anionic phospholipid compositions of the tested LUVs are indicated. LUVs without anionic phospholipids are referred to as “DOPC/DOPE-only LUVs”.

**E** Ca<sup>2+</sup>-binding activity of membrane-anchored, full-length myoferlin (residues 1-2061, in detergent micelles, DDM) and soluble myoferlin (residues 1-1997) analysed using a nanoDSF-based assay. Error bars represent the standard error of the mean (s.e.m.; soluble myoferlin (1-1997): n=4, full-length myoferlin (1-2061)-DDM: n=7). [Ca<sup>2+</sup>]<sub>1/2</sub> was estimated by nonlinear regression curve fitting and Mg<sup>2+</sup> titration was used as a control.

**F** Ca<sup>2+</sup>-binding activity of full-length dysferlin (residues 1-2080, in detergent micelles, DDM), soluble dysferlin (residues 1-2017), and dysferlin proteoliposomes (dysferlin (1-2080)-LUVs) analysed using a nanoDSF-based assay. Dysferlin proteoliposomes were prepared by dialysis of the full-length sample in the presence of extruded LUVs (composed of 70 mol% DOPC, 20 mol% DOPE and 10 mol% cholesterol). The error bars represent the s.e.m. (dysferlin (1-2017): n=4, dysferlin (1-2080)-DDM: n=6, dysferlin (1-2080)-LUV: n=6).

**G** Ca<sup>2+</sup>-sensitive liposome binding activity of soluble myoferlin (residues 1-1997, sMYOF) using a fluorescence-based lipid-binding assay. Dansyl-labelled LUVs, prepared with DOPS (15 mol% DOPS), DOPS and PI(4,5)P<sub>2</sub> (25 mol% DOPS and 5 mol% PI(4,5)P<sub>2</sub>) or without anionic phospholipids (DOPC/DOPE-only), were used at a 50 μM concentration. Error bars represent the s.e.m. (n=3).

**H** Mass-photometry characterization of full-length dysferlin (residues 1-2080) reconstituted in detergent micelles (LMNG), showing a major population of monomeric dysferlin particles (molar mass of ~283 kDa). The inset depicts the mass distributions of dysferlin's major species at two Ca<sup>2+</sup> concentrations (2 mM CaCl<sub>2</sub> and 4 mM CaCl<sub>2</sub>, orange and green curves, respectively), compared to the Ca<sup>2+</sup>-free state (blue). In all cases, the mass photometry measurements were conducted at a ~50 nM dysferlin concentration in a sample buffer devoid of detergent. A domain composition schematic is shown above the mass photometry profile. The mass photometry measurements were repeated four times (n=4).

## Appendix Figure S2

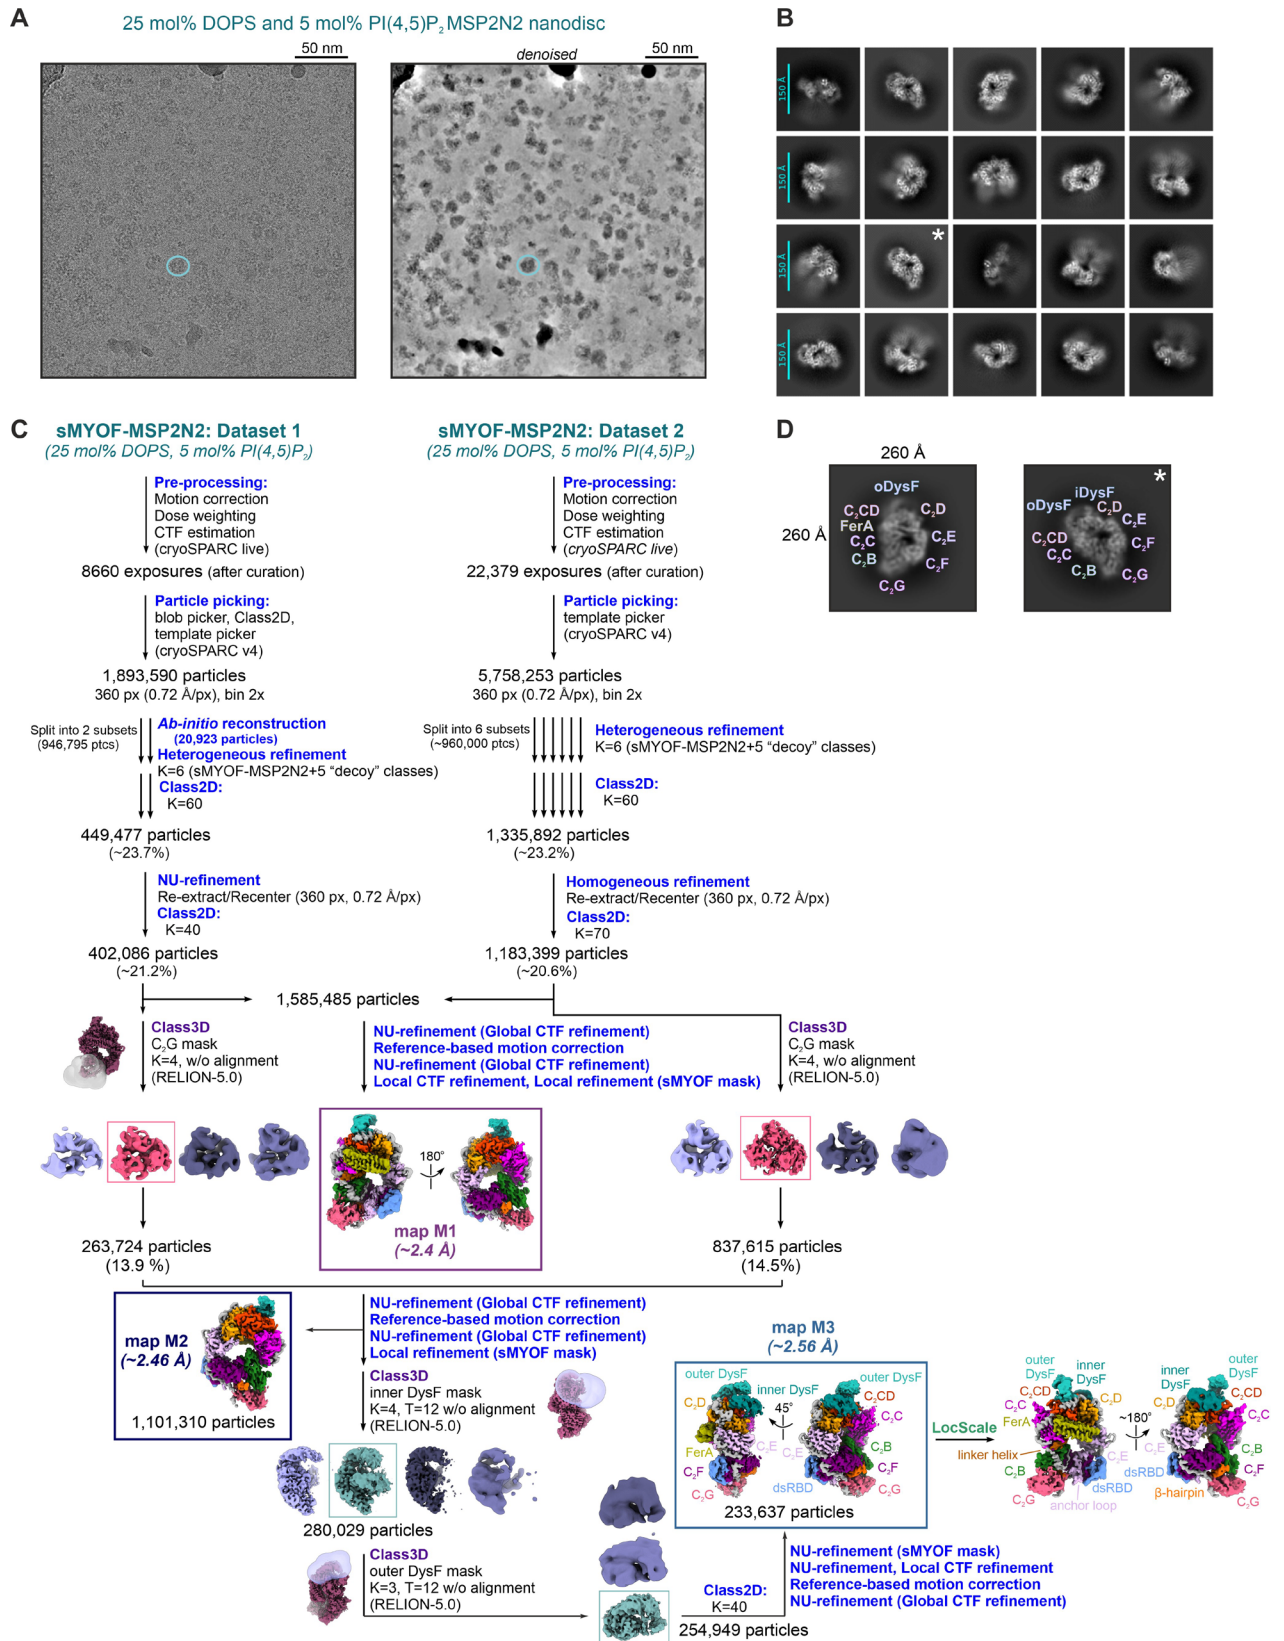

**Appendix Figure S2. Computational image analysis of the vitrified myoferlin (1-1997)-nanodisc complex (25 mol% DOPS and 5 mol% PI(4,5)P<sub>2</sub> nanodisc).**

**A** Cryo-EM micrograph of the vitrified myoferlin (1-1997)-nanodisc complex (25 mol% DOPS and 5 mol% PI(4,5)P<sub>2</sub> MSP2N2 nanodisc). A characteristic, monomeric particle is circled in cyan, in both the raw (left) and denoised (right) exposure.

**B** Reference-free 2D class averages of the myoferlin (1-1997)-nanodisc complex, comprising 25 mol% DOPS and 5 mol% PI(4,5)P<sub>2</sub>. High-resolution 2D class averages of the sample were generated with the cryosparc-tools package (<https://tools.cryosparc.com/examples/hi-res-2d-classes.html>). The 2D average marked with an asterisk is shown as a close-up view in D.

**C** Cryo-EM data processing routine of the lipid-bound myoferlin, assembled on a 25 mol% DOPS and 5 mol% PI(4,5)P<sub>2</sub> MSP2N2 nanodisc (see also Appendix Fig S1B-C). The final maps are boxed and colour-coded after the modelled domains (as in Fig 1).

**D** Close-up views of two characteristic 2D class averages of the myoferlin (1-1997)-MSP2N2 complex (25 mol% DOPS and 5 mol% PI(4,5)P<sub>2</sub> nanodisc). The visible myoferlin domains are indicated and colour-coded.

## Appendix Figure S3

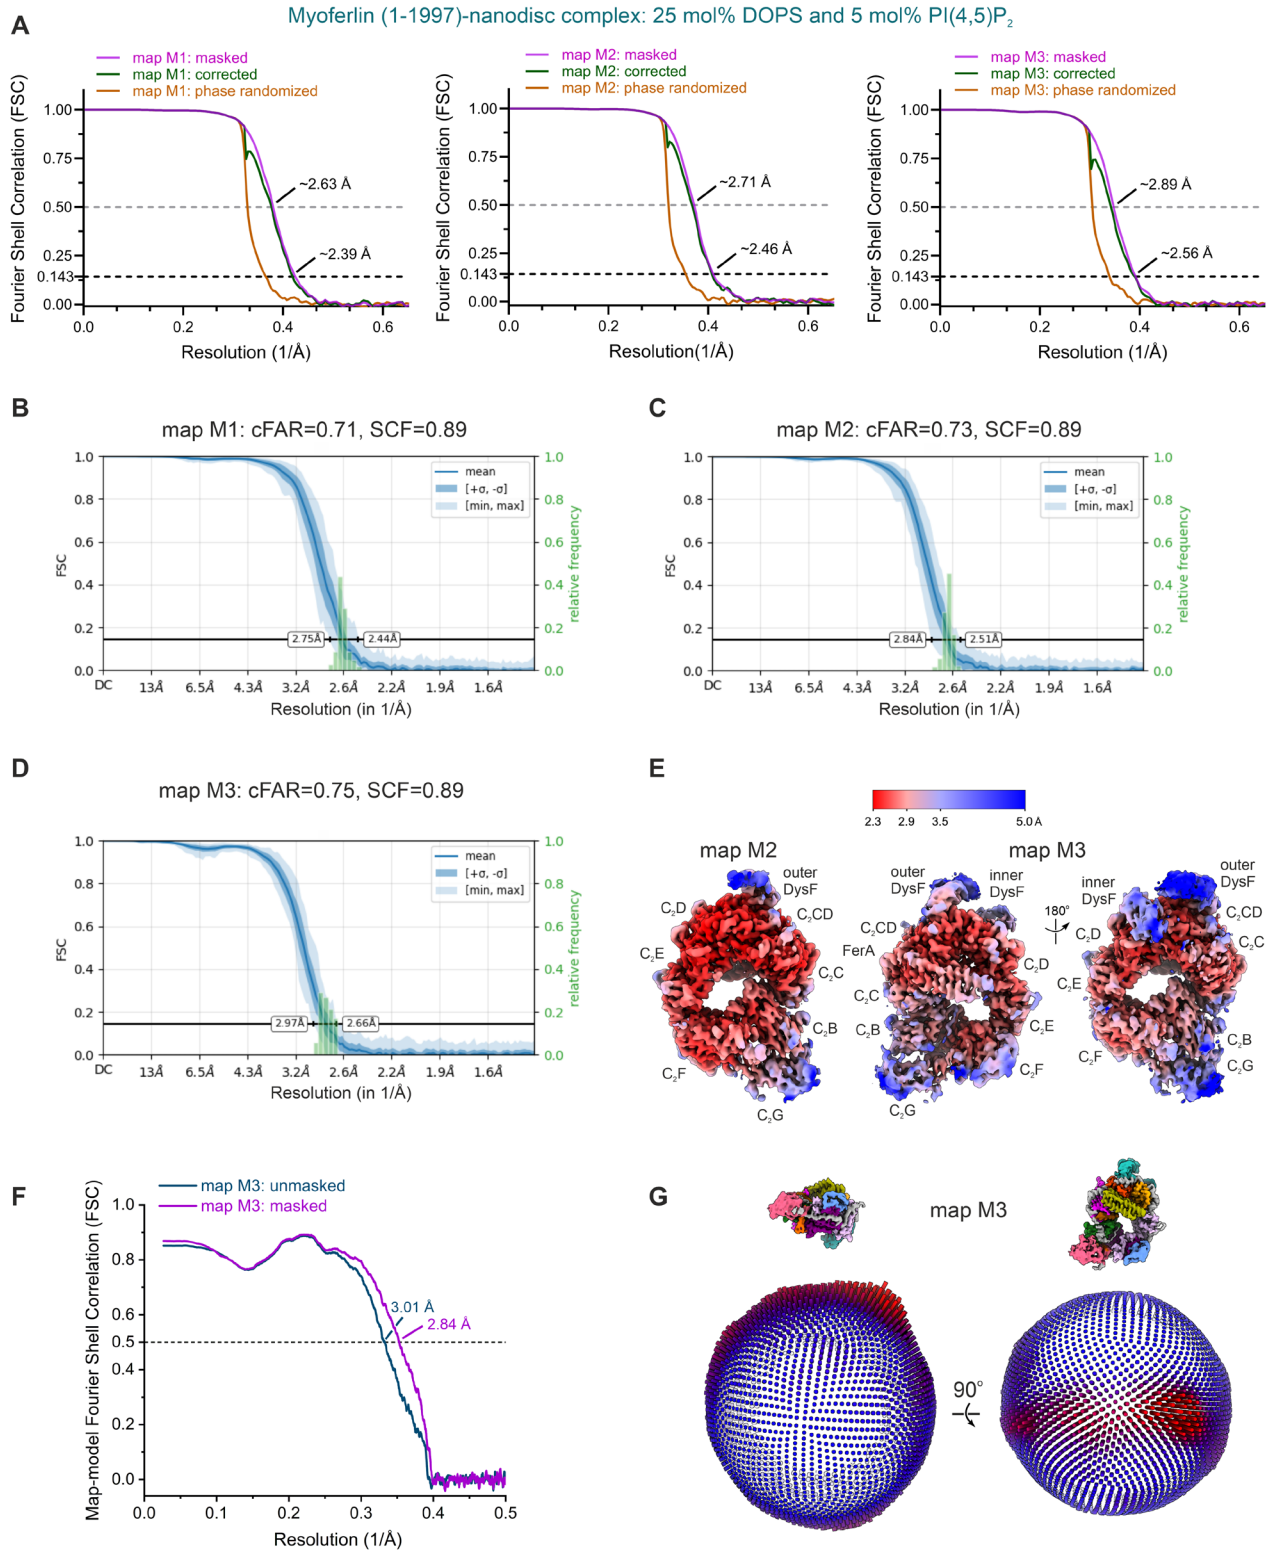

**Appendix Figure S3. Resolution and quality of the lipid-bound myoferlin (1-1997) cryo-EM maps (25 mol% DOPS and 5 mol% PI(4,5)P<sub>2</sub> nanodisc).**

**A** Fourier shell correlation (FSC) between the final myoferlin (1-1997)-nanodisc cryo-EM half-maps (25 mol% DOPS and 5 mol% PI(4,5)P<sub>2</sub>) MSP2N2 nanodisc). The gold-standard FSC criterion (FSC=0.143) indicates global resolution estimates of ~2.39 Å (consensus map), ~2.46 Å (after masked C<sub>2</sub>G classification), and ~2.56 Å (after masked DysF classification) for the M1, M2, and M3 maps, respectively.

**B-D** Directional resolution and Fourier sampling of the myoferlin (1-1997)-nanodisc cryo-EM maps. The conical FSC, the conical FSC area ratio (cFAR), and the sampling compensation factor (SCF) were calculated and plotted with cryoSPARC v.4.5.

**E** Local resolution of the myoferlin (1-1997)-nanodisc cryo-EM maps (25 mol% DOPS and 5 mol% PI(4,5)P<sub>2</sub> MSP2N2 nanodisc). Red colour indicates higher resolution.

**F** Map versus model FSC plot for the myoferlin (1-1997)-nanodisc complex (map M3, 25 mol% DOPS and 5 mol% PI(4,5)P<sub>2</sub> MSP2N2 nanodisc).

**G** 3D angular distribution of the myoferlin particles contributing to the overall (M3) map (25 mol% DOPS and 5 mol% PI(4,5)P<sub>2</sub>) MSP2N2 nanodisc). The similarly oriented and colour-coded maps of the complex are shown above the angular distribution plot. Red colour and relative cylinder height indicate a higher number of particle images.



## Appendix Figure S4

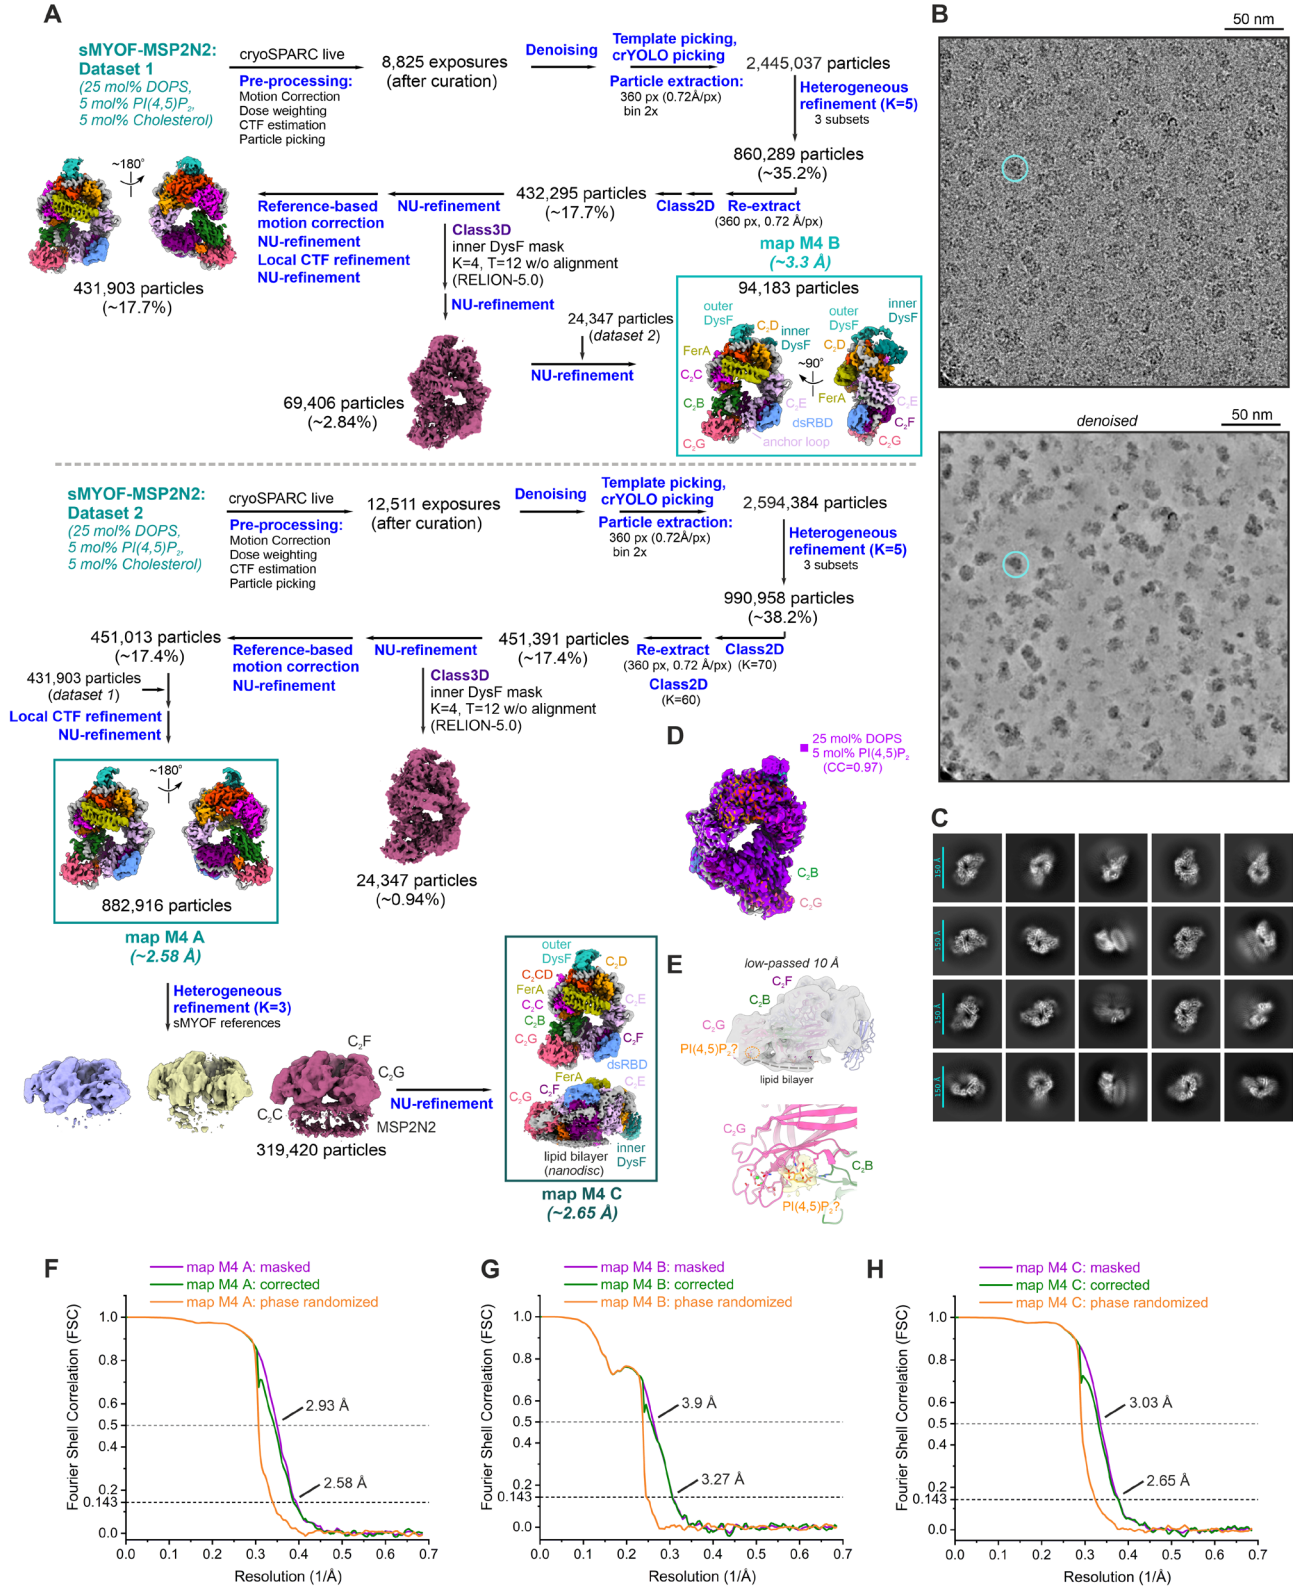

**Appendix Figure S4. Cryo-EM image analysis of the vitrified myoferlin (1-1997)-nanodisc complex (25 mol% DOPS, 5 mol% PI(4,5)P<sub>2</sub> and 5 mol% cholesterol MSP2N2 nanodisc).**

**A** Cryo-EM processing schematic for the soluble myoferlin (1-1997), bound to a 25 mol% DOPS, 5 mol% PI(4,5)P<sub>2</sub> and 5 mol% cholesterol MSP2N2 nanodisc. The resolution estimates (FSC=0.143 criterion) of the final maps are indicated and the final maps are coloured after the modelled domains.

**B** Cryo-EM micrograph (raw and denoised) of the imaged myoferlin (1-1997)-nanodisc complex (containing 25 mol% DOPS, 5 mol% PI(4,5)P<sub>2</sub> and 5 mol% cholesterol). A single vitrified particle is circled in cyan.

**C** Reference-free 2D class averages of the myoferlin (1-1997)-nanodisc complex (25 mol% DOPS, 5 mol% PI(4,5)P<sub>2</sub> and 5 mol% cholesterol nanodisc). Images of 2D class averages were generated with the cryosparc-tools package (<https://tools.cryosparc.com/examples/hi-res-2d-classes.html>).

**D** Superposition between the consensus cryo-EM maps of nanodisc-bound myoferlin (1-1997), obtained in the absence (purple, 25 mol% DOPS and 5 mol% PI(4,5)P<sub>2</sub>) or presence of cholesterol (colour-coded, 25 mol% DOPS, 5 mol% PI(4,5)P<sub>2</sub> and 5 mol% cholesterol).

**E** Low-passed cryo-EM map of the lipid-bound myoferlin (25 mol% DOPS, 5 mol% PI(4,5)P<sub>2</sub> and 5 mol% cholesterol nanodisc, map M4 C) showing ordered lipid headgroups, including a tentative PI(4,5)P<sub>2</sub>, located at the interface between C<sub>2</sub>F, C<sub>2</sub>G and C<sub>2</sub>B.

**F-H** Fourier shell correlation (FSC) plots for the myoferlin (1-1997)-nanodisc cryo-EM maps (25 mol% DOPS, 5 mol% PI(4,5)P<sub>2</sub> and 5 mol% cholesterol datasets).

## Appendix Figure S5

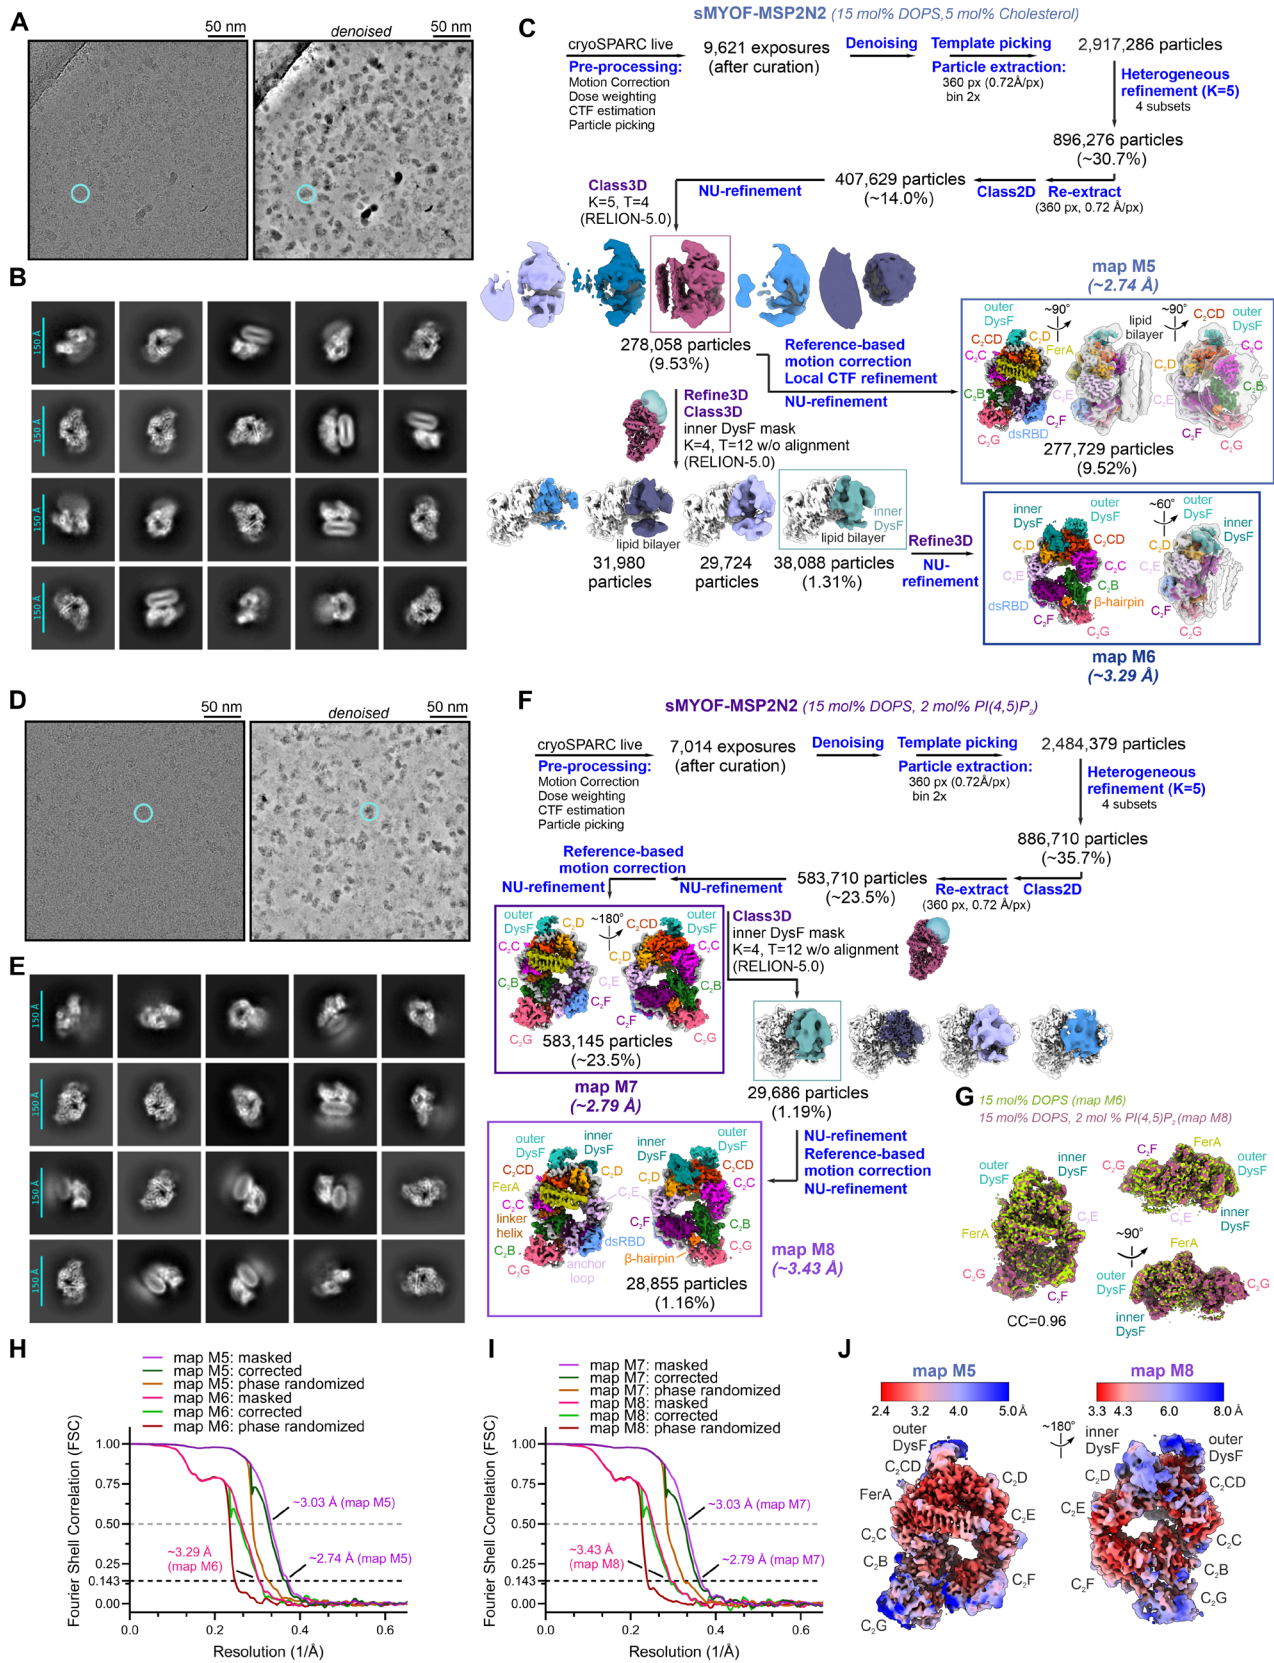



**Appendix Figure S5. Cryo-EM analysis of the myoferlin (1-1997)-lipid complexes assembled on 15 mol% DOPS and 5 mol% Cholesterol or 15 mol% and 2 mol% PI(4,5)P<sub>2</sub> MSP2N2 nanodiscs.**

**A-B** Cryo-EM (raw and denoised) micrograph and 2D class averages of the myoferlin (1-1997)-nanodisc complex (15 mol% DOPS and 5 mol% cholesterol MSP2N2 nanodisc). The 2D class averages shown in B were generated with the cryosparc-tools package (<https://tools.cryosparc.com/examples/hi-res-2d-classes.html>).

**C** Cryo-EM data processing schematic for vitrified myoferlin (1-1997) bound to a 15 mol% DOPS and 5 mol% cholesterol nanodisc. The final maps are coloured according to the modelled domains and the resolution estimates (FSC=0.143 criterion) are indicated.

**D-F** Cryo-EM image analysis of the soluble myoferlin (1-1997)-lipid complex, assembled on a 15 mol% DOPS and 2 mol% PI(4,5)P<sub>2</sub> MSP2N2 nanodisc. The 2D class averages shown in E were generated with the cryosparc-tools package (<https://tools.cryosparc.com/examples/hi-res-2d-classes.html>).

**G** Superposition between the M6 (15 mol% DOPS and 5 mol% Cholesterol) and M8 (15 mol% DOPS and 2 mol% PI(4,5)P<sub>2</sub>) nanodisc-bound myoferlin (1-1997) maps. The two cryo-EM maps are nearly identical (CC=0.96).

**H-I** Fourier shell correlation (FSC) plots for the lipid-bound myoferlin (1-1997) maps (15 mol% DOPS and 2 mol% PI(4,5)P<sub>2</sub> or 15 mol% DOPS and 5 mol% cholesterol nanodisc complexes).

**J** Local resolution of the myoferlin (1-1997)-nanodisc cryo-EM maps, depicted in C and F. Red colour indicates a higher resolution.

## Appendix Figure S6

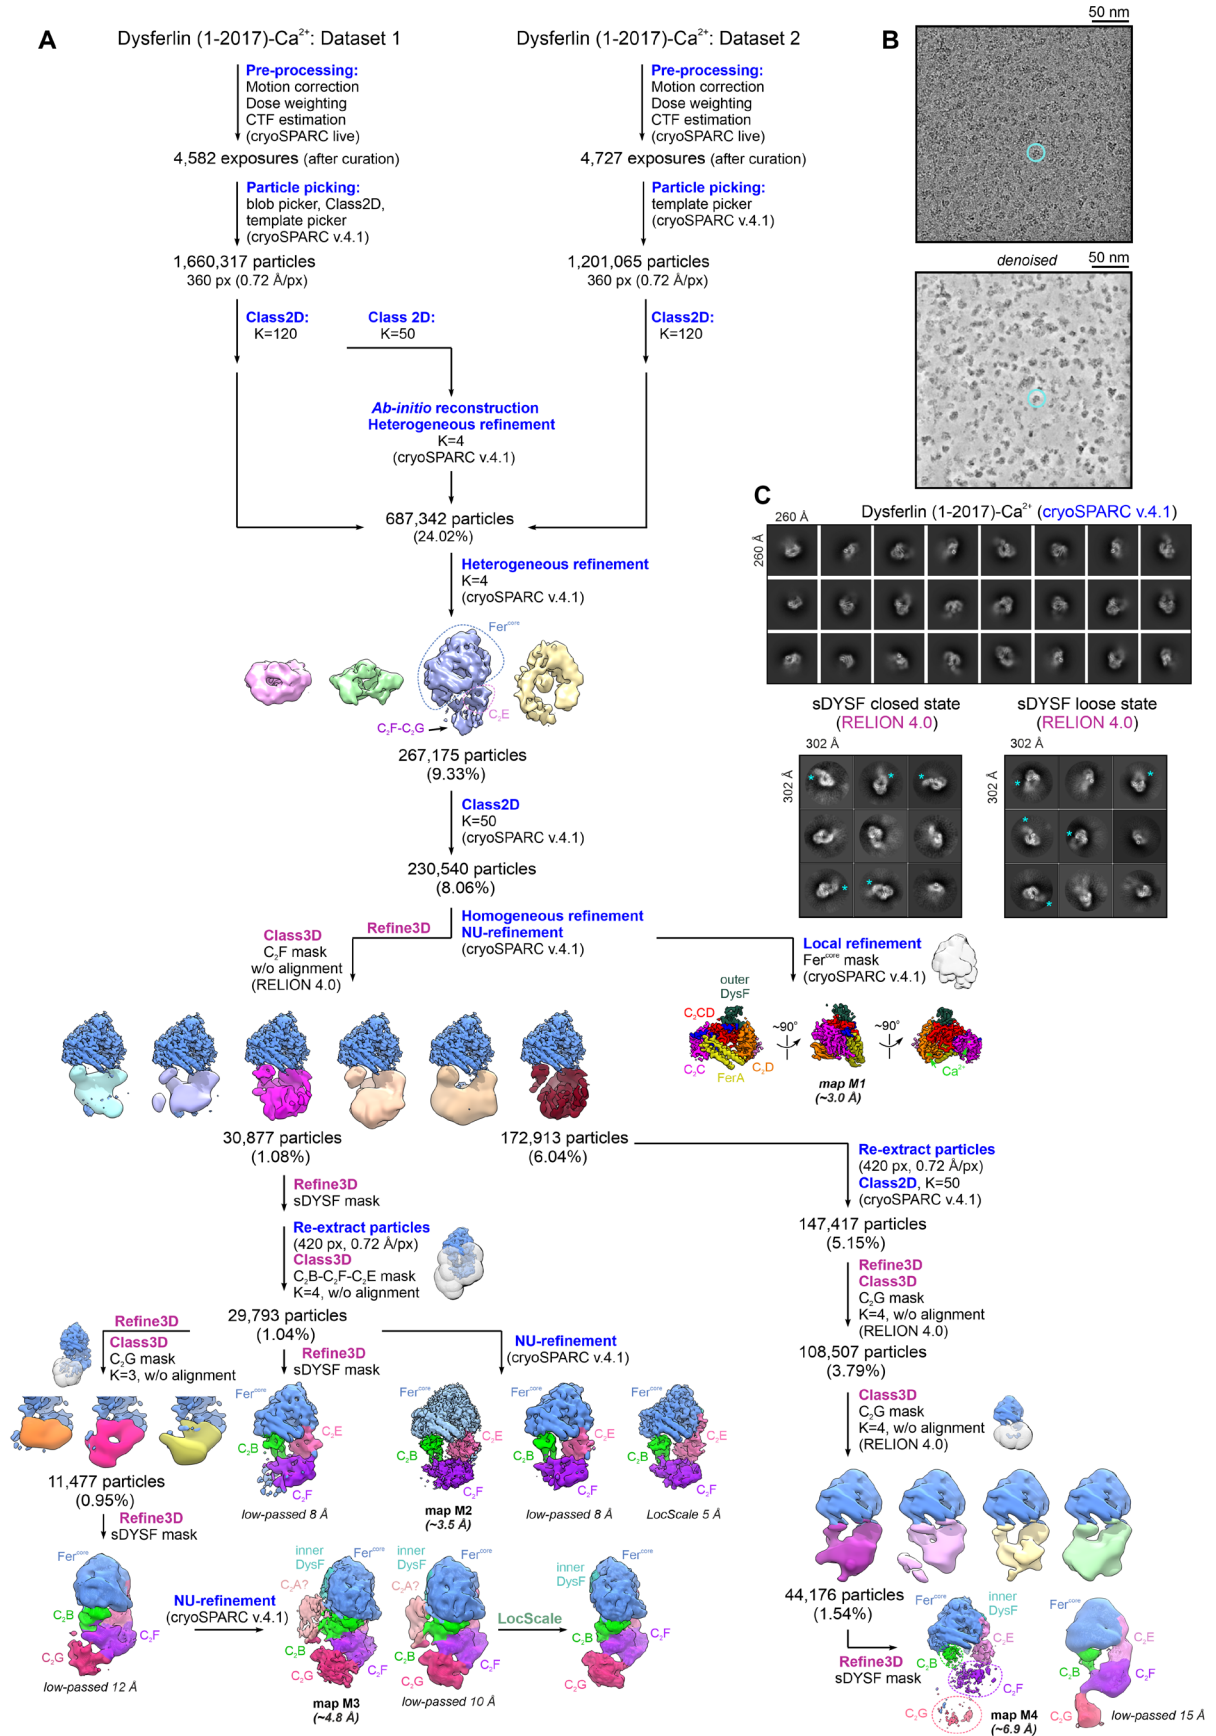

**Appendix Figure S6. Computational image analysis of the lipid-free soluble dysferlin (1-2017) cryo-EM datasets.**

**A** Cryo-EM data processing schematic for the  $\text{Ca}^{2+}$ -bound soluble dysferlin (sDYSF, residues 1-2017). The resolution of the final maps (M1-M4) was estimated according to the gold-standard Fourier Shell Correlation (FSC) cutoff of 0.143. The key structural domains of dysferlin (1-2017) are coloured and indicated in the final maps.

**B** Typical cryo-EM micrograph (raw and denoised) of the vitrified lipid-free soluble dysferlin (1-2017). A dysferlin particle is circled in cyan.

**C** Reference-free 2D class averages of lipid-free dysferlin (1-2017). The 2D class averages calculated from the “closed” and “loose” state particle images are shown in the bottom panel. The  $\text{C}_2\text{F}$  domain is marked with an asterisk. The C-terminal domain is more ordered in the “closed” state 2D classes (left panel) compared to the “loose” dysferlin state (right panel).

## Appendix Figure S7

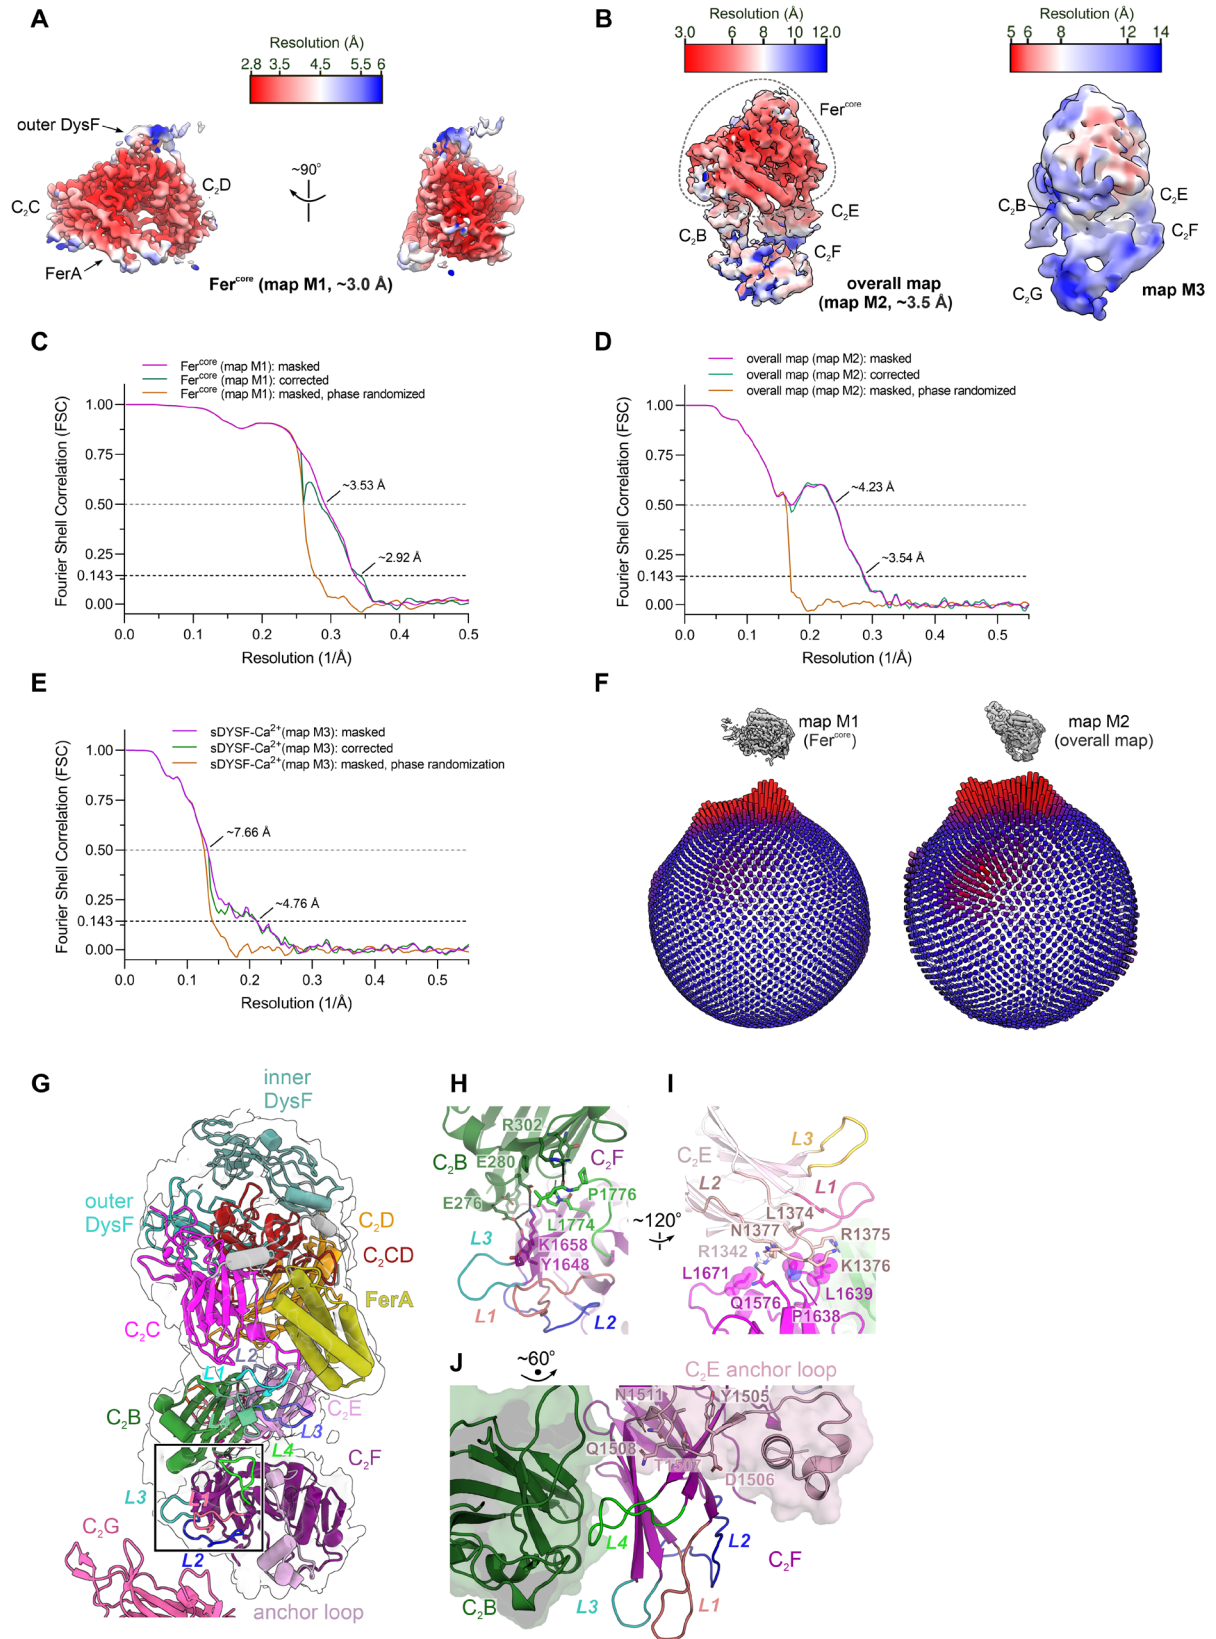

### **Appendix Figure S7. Resolution and quality of the lipid-free dysferlin (1-2017) cryo-EM maps.**

**A** Local resolution of the lipid-free Fer<sup>core</sup> map (map M1) of dysferlin (1-2017). Red colour indicates higher resolution.

**B** Overall maps of Ca<sup>2+</sup>-bound soluble dysferlin (map M2 and M3), coloured by local resolution. The Fer<sup>core</sup> (C<sub>2</sub>C-C<sub>2</sub>CD-FerA-C<sub>2</sub>D) is resolved at a higher resolution compared to the more dynamic C<sub>2</sub>B-C<sub>2</sub>F-C<sub>2</sub>E region.

**C-E.** Fourier shell correlation (FSC) between the final lipid-free dysferlin (1-2017) half-maps. The gold-standard FSC criterion (FSC=0.143) indicates global resolution estimates of ~2.9 Å, ~3.5 Å, and ~4.8 Å for the M1, M2, and M3 maps, respectively.

**F** 3D angular distribution of the dysferlin particles contributing to the Fer<sup>core</sup> (M1) and overall (M2) maps. Red colour and increased cylinder height indicate a higher number of particle images.

**G** Tertiary interfaces between C<sub>2</sub>F, C<sub>2</sub>B, and C<sub>2</sub>E observed in the dysferlin (1-2017) cryo-EM model. In the lipid-free state, the C<sub>2</sub>F domain is positioned at the base of the dysferlin ring through multiple interactions with the N-terminal C<sub>2</sub>B and upstream C<sub>2</sub>E. The final model of dysferlin (1-2017) is shown as cartoons and fitted inside the overall cryo-EM map (transparent surface). The L1-L4 loops of C<sub>2</sub>F are coloured pink, blue, teal, and green, respectively.

**H** Selected polar interactions between C<sub>2</sub>F's L3-L4 loops and C<sub>2</sub>B. The polar contacts between interacting residues are shown as dashed lines.

**I** Polar and hydrophobic interactions between the bottom loops of C<sub>2</sub>F and the L2 loop of C<sub>2</sub>E. Residues involved in hydrophobic interactions are shown as transparent spheres.

**J** Contact interfaces between C<sub>2</sub>F and the anchor loop of C<sub>2</sub>E (residues 1475-1514). C<sub>2</sub>B and the anchor loop are shown as transparent surfaces.



## Appendix Figure S8

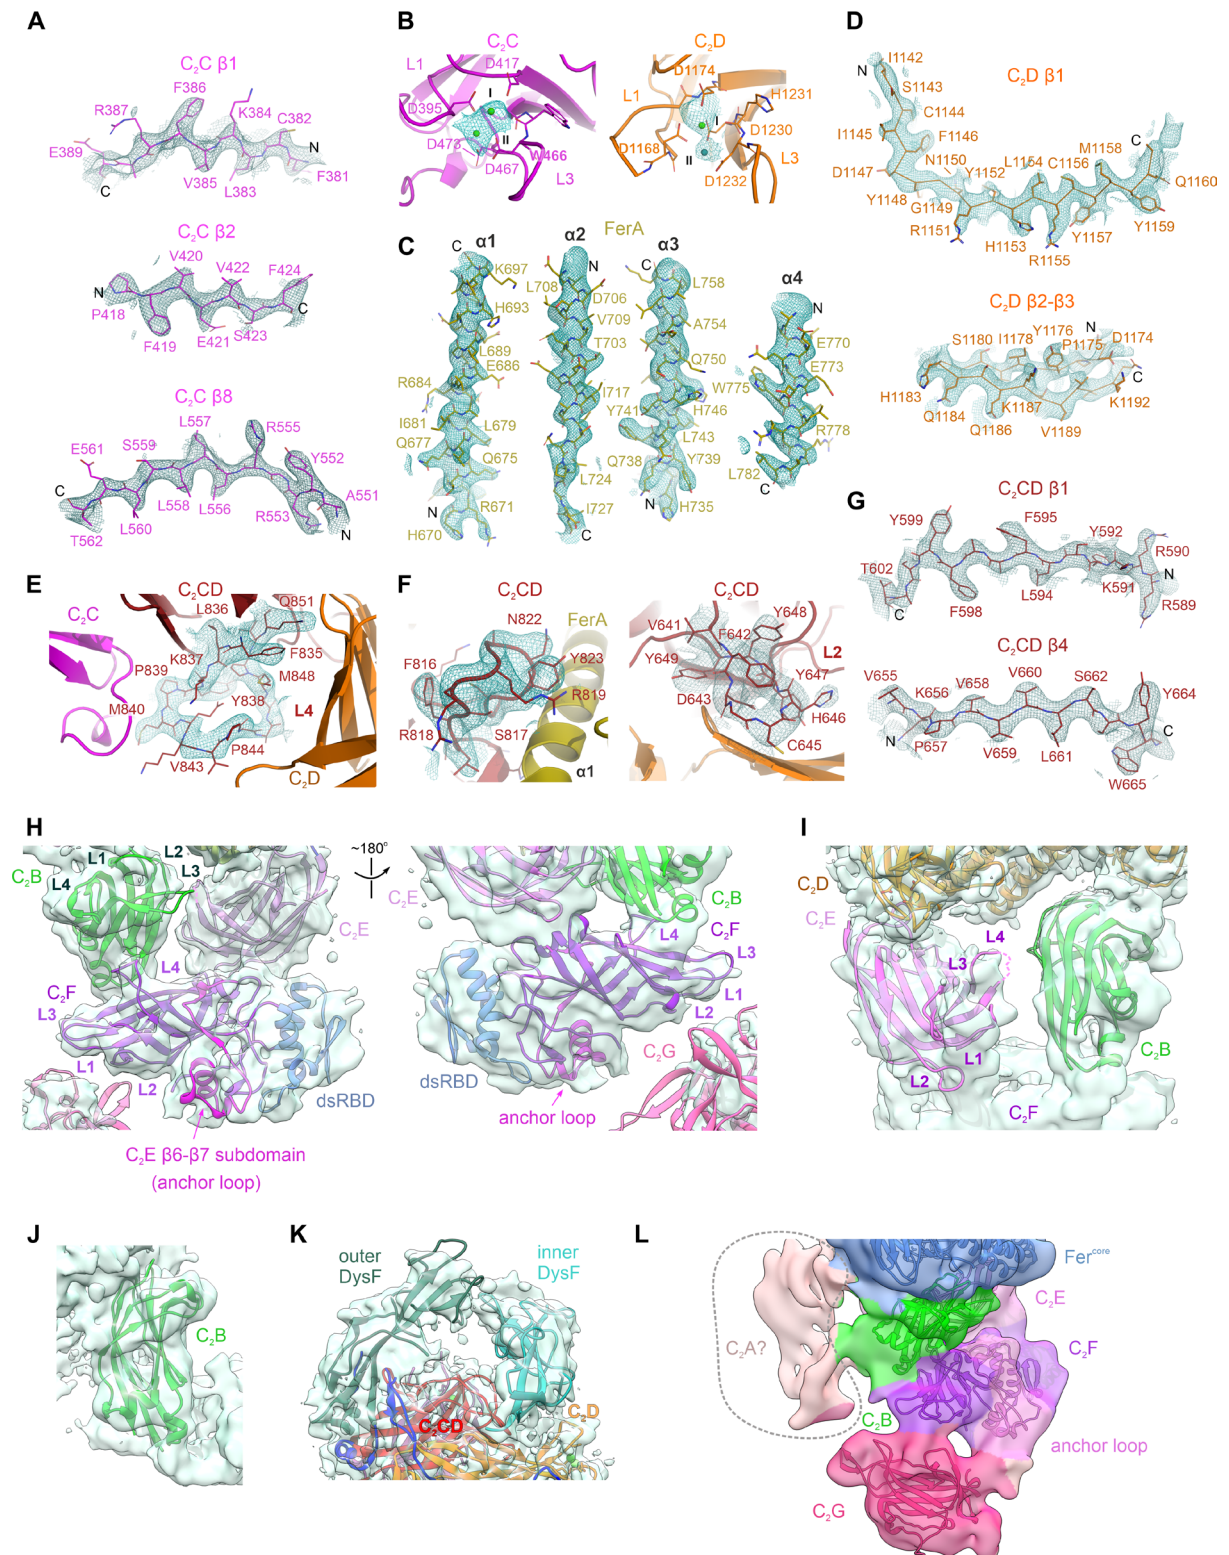

**Appendix Figure S8. Snapshots of the lipid-free dysferlin (1-2017) cryo-EM density.**

**A** Snapshots of C<sub>2</sub>C's cryo-EM density. C<sub>2</sub>C's  $\beta$ -strands are shown as sticks.

**B** Ca<sup>2+</sup>-binding sites of dysferlin's C<sub>2</sub>C and C<sub>2</sub>D domains. The cryo-EM density map is coloured cyan and contoured around the Ca<sup>2+</sup>-binding sites.

**C** Cryo-EM density of dysferlin's FerA domain. The FerA  $\alpha$ -helices are amphipathic and form a typical up-down-up-down four-helix bundle.

**D** Cryo-EM densities of C<sub>2</sub>D's  $\beta$ -strands.

**E** Cryo-EM density of C<sub>2</sub>CD's L4 loop, bridging the C<sub>2</sub>C and C<sub>2</sub>D domains.

**F** Cryo-EM densities of C<sub>2</sub>CD's  $\beta$ 6- $\beta$ 7 and L2 loops, interacting with the FerA and C<sub>2</sub>D domains, respectively.

**G** Densities of selected C<sub>2</sub>CD  $\beta$ -strands.

**H-I** Modelling of C<sub>2</sub>B, C<sub>2</sub>E, and C<sub>2</sub>F in the closed state cryo-EM map (map M2). The top loops of C<sub>2</sub>B and C<sub>2</sub>E project onto opposite surfaces of the dysferlin ring, whereas the top loops of C<sub>2</sub>F adopt a lateral orientation and face the C<sub>2</sub>B domain.

**J** Side view of C<sub>2</sub>B's density with the modelled domain fitted inside the cryo-EM map.

**K** Cryo-EM densities of the outer and inner DysF motifs of dysferlin. The outer and inner DysF motifs occupy a peripheral location, between C<sub>2</sub>CD and C<sub>2</sub>D, and share a dynamic contact interface (*i.e.*, not present in all imaged particles).

**L** Densities of the C-terminal C<sub>2</sub>F and C<sub>2</sub>G domains. The cryo-EM map (map M3) has been low-pass filtered to 10 Å. The unassigned density element, connected to C<sub>2</sub>B, might correspond to the N-terminal C<sub>2</sub>A domain, sampling many conformational states in solution. The long linker between C<sub>2</sub>A and C<sub>2</sub>B is, likely, unstructured. Interestingly, the linker helix (Fig 1D) could not be resolved in the lipid-free dysferlin structure.

Appendix Figure S9

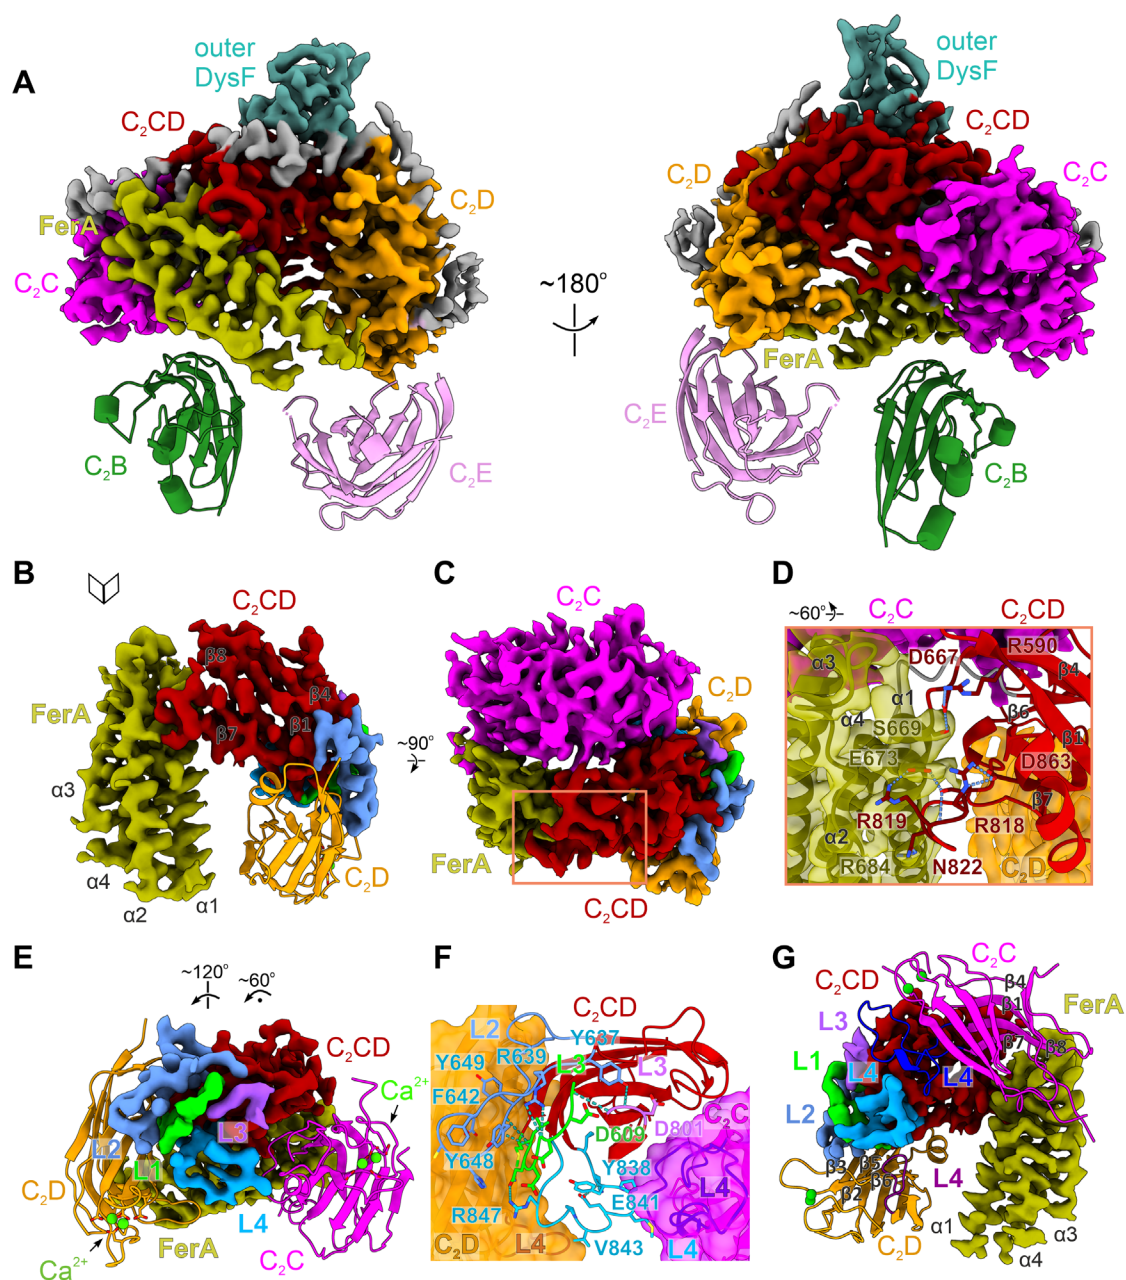



**Appendix Figure S9. Structural organization of dysferlin's Fer<sup>core</sup> module.**

**A** Structure of dysferlin's core module (Fer<sup>core</sup>) resolved at 2.9 Å resolution. The focused cryo-EM map of the C<sub>2</sub>C-C<sub>2</sub>D region (map M1), shown in two different orientations, has been sharpened and colour-coded.

**B-C** Interaction interfaces between C<sub>2</sub>CD and its neighbouring FerA, C<sub>2</sub>C, and C<sub>2</sub>D domains. The sharpened cryo-EM map is coloured according to the modelled domains.

**D** An insertion in C<sub>2</sub>CD's β6-β7 appears to stabilize the conformation of FerA. Dysferlin's domains are depicted in cartoon representation, and the sharpened cryo-EM map is contoured around FerA and C<sub>2</sub>D. The key polar interactions between C<sub>2</sub>CD's β6-β7 loop and FerA are shown as dashed blue lines.

**E** C<sub>2</sub>CD's top loops engage in multiple contacts with C<sub>2</sub>C and C<sub>2</sub>D. The L1-L4 loops of C<sub>2</sub>CD are coloured green, light blue, purple, and blue, respectively. C<sub>2</sub>CD and FerA are shown as cryo-EM maps.

**F** Selected polar interactions between C<sub>2</sub>CD's top loops (L1-L4) and C<sub>2</sub>C-C<sub>2</sub>D. Polar interactions are shown as dashed blue lines. C<sub>2</sub>C and C<sub>2</sub>D are displayed as surfaces.

**G** The large contact interfaces between C<sub>2</sub>CD-FerA and the Ca<sup>2+</sup>-binding C<sub>2</sub>C and C<sub>2</sub>D domains. C<sub>2</sub>CD and FerA are shown as cryo-EM maps, whereas C<sub>2</sub>C and C<sub>2</sub>D are shown as cartoons.

Appendix Figure S10

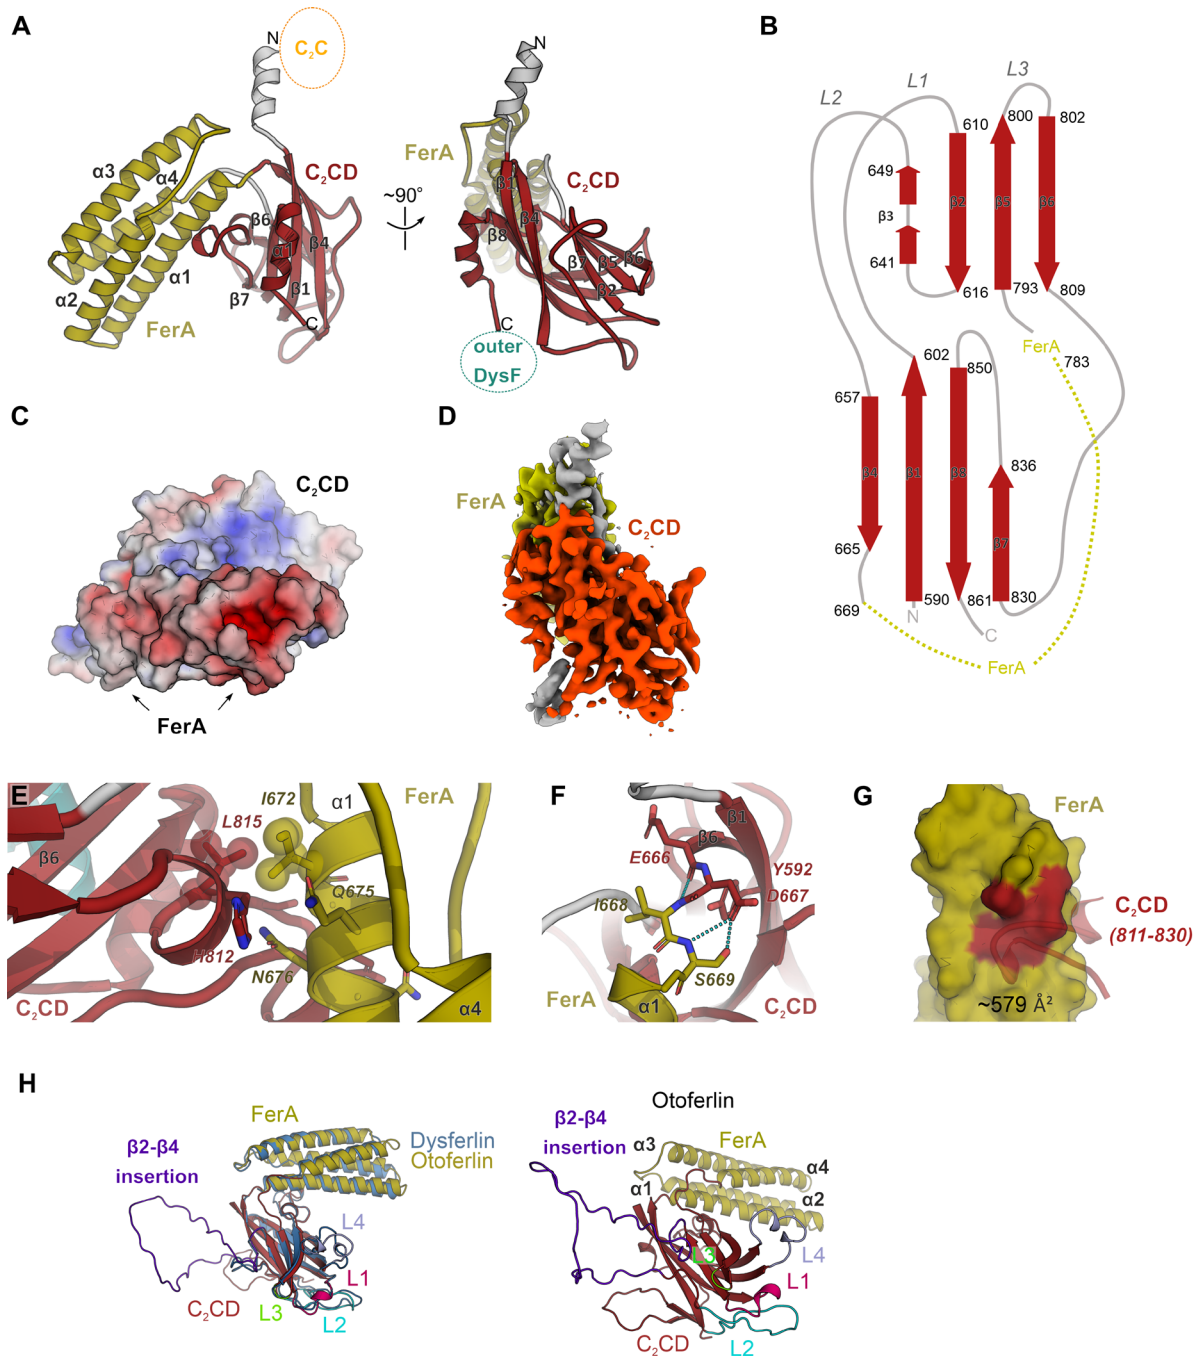

**Appendix Figure S10. C<sub>2</sub>CD represents a new C<sub>2</sub>-like structural domain in ferlins.**

**A** Structure of the C<sub>2</sub>CD-FerA module, using human dysferlin as an example. The FerA four-helix bundle inserts between C<sub>2</sub>CD's  $\beta$ 4- $\beta$ 5 strands.

**B** Topology diagram of the C<sub>2</sub>CD domain. As all other ferlin C<sub>2</sub> domains, C<sub>2</sub>CD has a type-II topology: its two  $\beta$ -sheets are formed by the  $\beta$ 1- $\beta$ 4- $\beta$ 7- $\beta$ 8 and  $\beta$ 2- $\beta$ 3- $\beta$ 5- $\beta$ 6 strands, respectively.

**C** Surface-charge distribution of the C<sub>2</sub>CD-FerA module of dysferlin. The electrostatic potentials are coloured from red (negative, -3 k<sub>B</sub>T/e<sup>-</sup>) to blue (positive, +3 k<sub>B</sub>T/e<sup>-</sup>) and mapped onto the solvent-excluded surface of the domains.

**D** Cryo-EM density of dysferlin's C<sub>2</sub>CD-FerA module, oriented and coloured as in A.

**E-F** Selected contacts between C<sub>2</sub>CD and FerA. The polar interactions are represented as dashed lines.

**G** C<sub>2</sub>CD's  $\beta$ 6- $\beta$ 7 loop interacts with the FerA domain. FerA's  $\alpha$ 1 helix is shown as a surface representation, and the C<sub>2</sub>CD interacting residues are coloured red.

**H** A similarly organized C<sub>2</sub>CD-FerA module is likely present in all human ferlins. AlphaFold2 prediction of otoferlin's C<sub>2</sub>CD-FerA region (right) is depicted side-by-side with its structural superposition to the cryo-EM model of dysferlin's C<sub>2</sub>CD-FerA (left). Note that a large insertion between C<sub>2</sub>CD's  $\beta$ 2- $\beta$ 4 strands is predicted in otoferlin.

## Appendix Figure S11

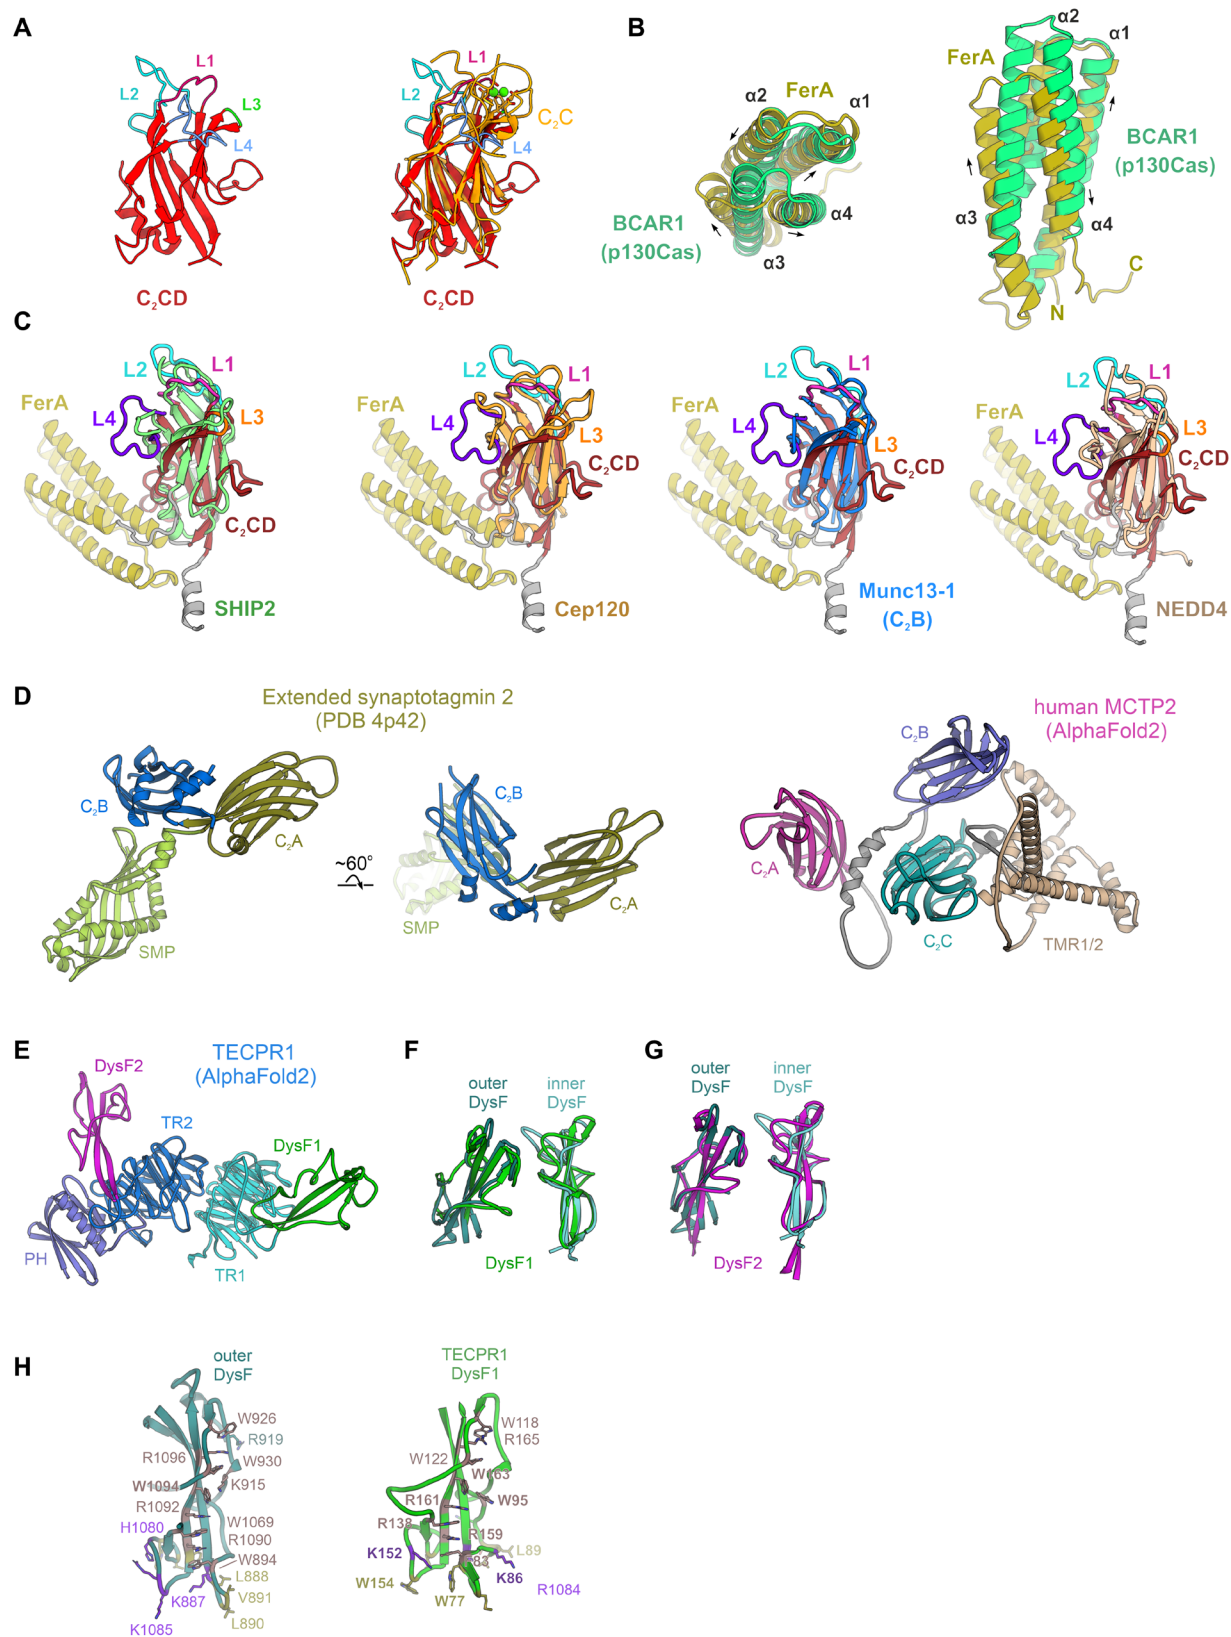

### **Appendix Figure S11. Structural conservation of ferlin C<sub>2</sub>CD, FerA, and DysF motifs.**

**A** Structural superposition of C<sub>2</sub>CD and the Ca<sup>2+</sup>-bound C<sub>2</sub>C domain of dysferlin, as an exemplary type-I ferlin. C<sub>2</sub>C's Ca<sup>2+</sup> ions are shown as green spheres.

**B** Structural similarity between dysferlin's FerA domain and the four-helix bundle of BCAR1 (p130Cas, PDB 3t6g). The direction of the four  $\alpha$ -helices is indicated by arrows.

**C** Alignments between the C<sub>2</sub>CD domain of dysferlin and the structurally similar C<sub>2</sub> domains of SHIP2 phosphatase (PDB 5OKM), Cep120 (PDB 6FLJ), Munc13-1 (PDB 5UE8), and NEDD4 (PDB 3M7F). The C<sub>2</sub> domains were aligned using Foldseek (van Kempen, Kim et al., 2024).

**D** Structures of extended synaptotagmin 2 (ESYT2, PDB 4P42) and human MCTP2 (Multiple C<sub>2</sub> and transmembrane domain-containing protein 2, AlphaFold2 prediction). SMP – synaptotagmin-like mitochondrial-lipid-binding protein domain; TMR1/2 – transmembrane region 1 and 2.

**E** AlphaFold2 prediction of TECPR1 (Tectonin Beta-Propeller Repeat-containing Protein 1)'s structure. The tectonin repeat  $\beta$ -propellers are coloured blue and cyan, respectively (TR1, TR2). The two spatially separated DysF motifs are coloured green (DysF1) and magenta (DysF2).

**F** Superposition of dysferlin's outer and inner DysF motifs and the related DysF1 domain of TECPR1, predicted by AlphaFold2 (Jumper et al., 2021).

**G** Structural superposition between the DysF motifs of dysferlin and TECPR1's DysF2.

**H** Stabilizing arginine/tryptophan (R/W) stacking interactions are present in both dysferlin/myoferlin's and TECPR1's DysF motifs. In both cases, the R/W stacks (shown as sticks) are mainly observed on one side of the DysF  $\beta$ -sheet (Patel, Harris et al., 2008, Sula, Cole et al., 2014).

## Appendix Figure S12

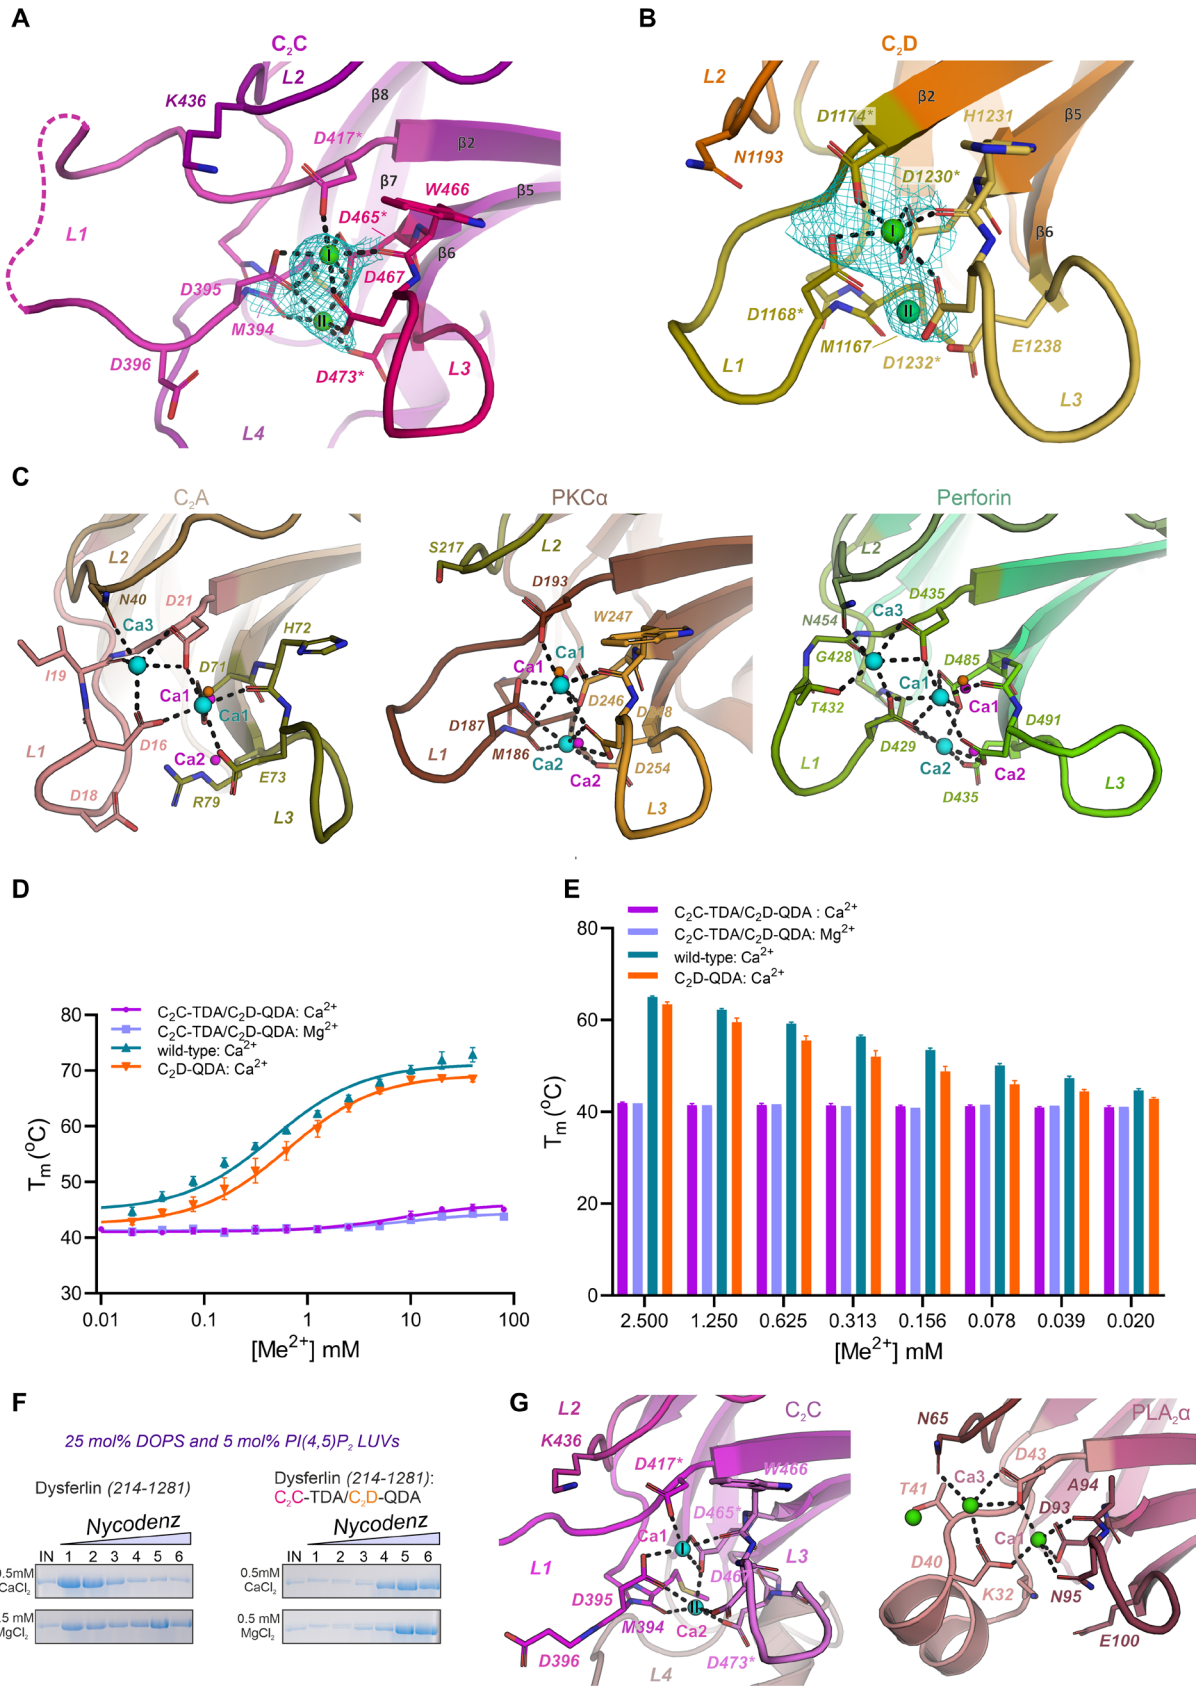

**Appendix Figure S12. Ca<sup>2+</sup>-binding sites in the Fer<sup>core</sup> module of dysferlin, modelled in the lipid-free state.**

**A** In dysferlin, two Ca<sup>2+</sup> ions bind to C<sub>2</sub>C's Ca<sup>2+</sup>-binding pocket. The cryo-EM map (cyan mesh) is contoured around the Ca<sup>2+</sup> ions (green spheres). Residues substituted with alanine (in D-E) are marked with asterisks.

**B** The Ca<sup>2+</sup>-binding sites of the C<sub>2</sub>D domain. Residues substituted for alanine in D-E are indicated with asterisks.

**C** Comparison of Ca<sup>2+</sup> coordination in dysferlin's C<sub>2</sub>C and C<sub>2</sub>A (PDB 7JOF) with the C<sub>2</sub> domains of PKC $\alpha$  (PDB 1DSY) and perforin (PDB 4Y1T). C<sub>2</sub>C's Ca<sup>2+</sup> ions are shown as magenta spheres, whereas the Ca<sup>2+</sup> sites of C<sub>2</sub>A, PKC $\alpha$ , and perforin are coloured cyan.

**D** Ca<sup>2+</sup>-binding activities of the Fer<sup>core</sup> of dysferlin (residues 214-1281) and of its C<sub>2</sub>D-QDA ("quadruple D (aspartate) to A (alanine)") and C<sub>2</sub>C-TDA ("triple D (aspartate) to A (alanine)")/C<sub>2</sub>D-QDA mutants. In C<sub>2</sub>D-QDA, four Ca<sup>2+</sup>-binding aspartates of C<sub>2</sub>D were substituted with alanine (D1168A, D1174A, D1230A, D1232A). In the C<sub>2</sub>C-TDA/C<sub>2</sub>D-QDA mutant, three additional residues of C<sub>2</sub>C were substituted with alanine (D417A, D465A, D473A) (see also Appendix Fig S13A-C). The nanoDSF-based Ca<sup>2+</sup>-activity measurements were performed in triplicate (n=3) for C<sub>2</sub>D-QDA and C<sub>2</sub>C-TDA/C<sub>2</sub>D-QDA, and five times (n=5) for the wild-type Fer<sup>core</sup> sample. Error bars represent the standard deviation (s.d.). The melting temperatures (T<sub>m</sub>) were plotted as a function of Ca<sup>2+</sup>/Mg<sup>2+</sup> concentration, and the [Ca<sup>2+</sup>]<sub>1/2</sub> values were estimated by nonlinear regression curve fitting.

**E** Bar plot of the Ca<sup>2+</sup>-activity data shown in D. Error bars represent the s.d..

**F** Ca<sup>2+</sup>-sensitive liposome binding activity of the wild-type and C<sub>2</sub>C-TDA/C<sub>2</sub>D-QDA Fer<sup>core</sup> of dysferlin (residues 214-1281). The liposomes (Large unilamellar vesicles, LUVs) contained 25 mol% DOPS and 5 mol% PI(4,5)P<sub>2</sub> anionic phospholipids. The Nycodenz step gradients (0%/30%/40%) were harvested from the top and analysed by SDS-PAGE. Importantly, disruption of C<sub>2</sub>C's and C<sub>2</sub>D's Ca<sup>2+</sup>-binding sites significantly reduced the ability of the Fer<sup>core</sup> module to interact with lipid membranes.

**G** Modelled Ca<sup>2+</sup>-binding sites in dysferlin's C<sub>2</sub>C domain and the C<sub>2</sub> domain of cytosolic phospholipase A<sub>2</sub> $\alpha$  (PLA<sub>2</sub> $\alpha$ , PDB 6IEJ). The Ca<sup>2+</sup> ions are depicted as spheres and the coordinating side chains shown as sticks. Notably, like the C<sub>2</sub>C domain of myoferlin (Fig 4F and 4I), PLA<sub>2</sub> $\alpha$ 's L1 loop features an amphipathic, lipid-binding  $\alpha$ -helix (Hirano, Gao et al., 2019).

## Appendix Figure S13

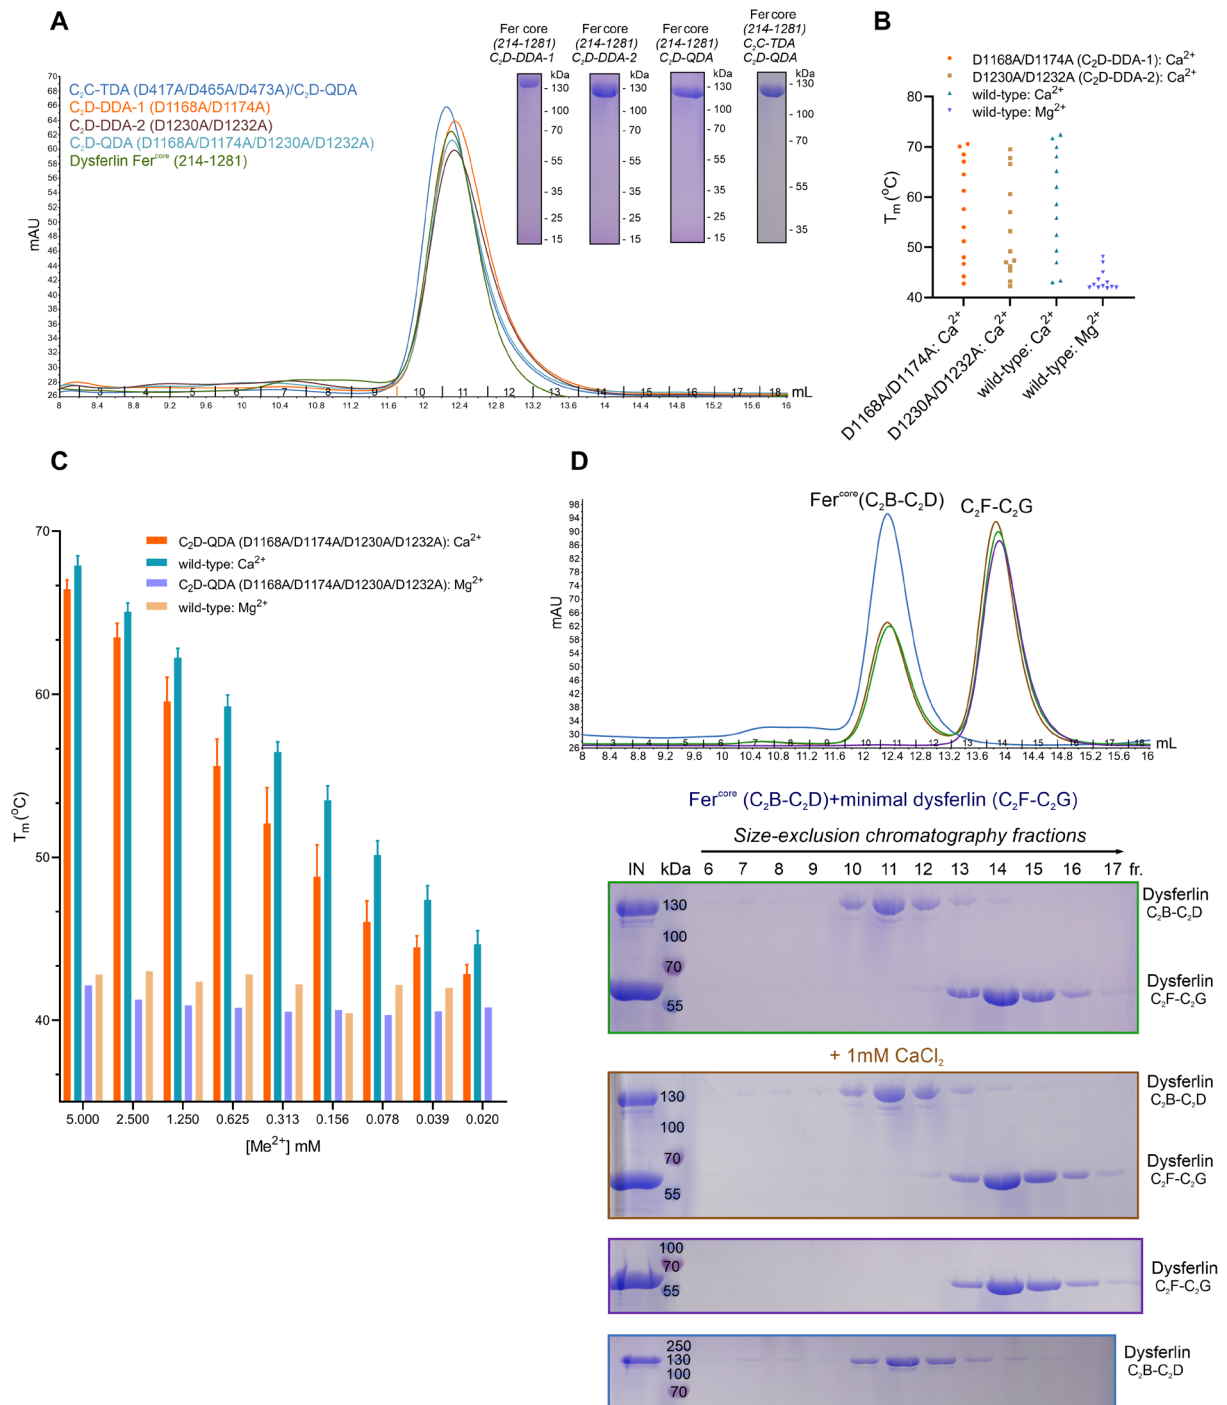



### Appendix Figure S13. Biochemical validation of Ca<sup>2+</sup>-binding sites in dysferlin.

**A** Size-exclusion chromatography (SEC) profiles of Ca<sup>2+</sup>-binding mutants in C<sub>2</sub>C and C<sub>2</sub>D. The purified mutants have retention volumes on Superdex 200 10/300 comparable to the wild-type Fer<sup>core</sup> (residues 214-1281). Therefore, substitution of two (C<sub>2</sub>D-DDA-1: D1168A/D1174A and C<sub>2</sub>D-DDA-2: D1230A/D1232A) or four Ca<sup>2+</sup>-binding aspartates (C<sub>2</sub>D-QDA: D1168A/D1174A/D1230A/D1232A) in C<sub>2</sub>D does not have a significant impact on the structure of the Fer<sup>core</sup>. Similarly, combined substitutions in C<sub>2</sub>C (C<sub>2</sub>C-TDA: D417A/D465A/D473A) and C<sub>2</sub>D (C<sub>2</sub>D-QDA) preserve the structural integrity of dysferlin's Fer<sup>core</sup> while abolishing its Ca<sup>2+</sup>-binding activity (see also Appendix Fig S12D-E). SDS-PAGE gels of the Fer<sup>core</sup> dysferlin mutants are shown as an inset.

**B** Ca<sup>2+</sup>-binding activity of C<sub>2</sub>D's DDA ("double D (aspartate) to A (alanine)") substitutions, measured using a nanoDSF assay. The melting temperatures (T<sub>m</sub>) of C<sub>2</sub>D-DDA-1 (D1168A/D1174A) and C<sub>2</sub>D-DDA-2 (D1230A/D1232A) were assessed as a function of [Ca<sup>2+</sup>] or [Mg<sup>2+</sup>]. Single nanoDSF T<sub>m</sub> estimates are shown (n=1).

**C** Ca<sup>2+</sup>-binding activity measurements of the C<sub>2</sub>D-QDA (D1168A/D1174A/D1230A/D1232A) Fer<sup>core</sup> mutant (see also Appendix Fig S12D-E). The estimated T<sub>m</sub> values were plotted as a function of [Ca<sup>2+</sup>] or [Mg<sup>2+</sup>]. Error bars represent the s.d. (C<sub>2</sub>D-QDA: n=3; wild-type: n=5).

**D** Probing the interaction between the C<sub>2</sub>B-C<sub>2</sub>D and C<sub>2</sub>F-C<sub>2</sub>G dysferlin fragments by SEC. The purified samples were mixed in the presence or absence of 1 mM CaCl<sub>2</sub> and subjected to SEC on a Superdex 200 10/300 column. The peak fractions were analysed by SDS-PAGE. In these experiments, no complex formation was observed between C<sub>2</sub>B-C<sub>2</sub>D (Fer<sup>core</sup>, residues 214-1281) and C<sub>2</sub>F-C<sub>2</sub>G (minimal dysferlin, residues 1503-1560 and 1613-2056): C<sub>2</sub>B-C<sub>2</sub>D peaked in fraction 11, whereas the C<sub>2</sub>F-C<sub>2</sub>G dysferlin fragment peaked in fraction 14. The SEC profiles of the reconstitution experiments are shown at the top.

## Appendix Figure S14

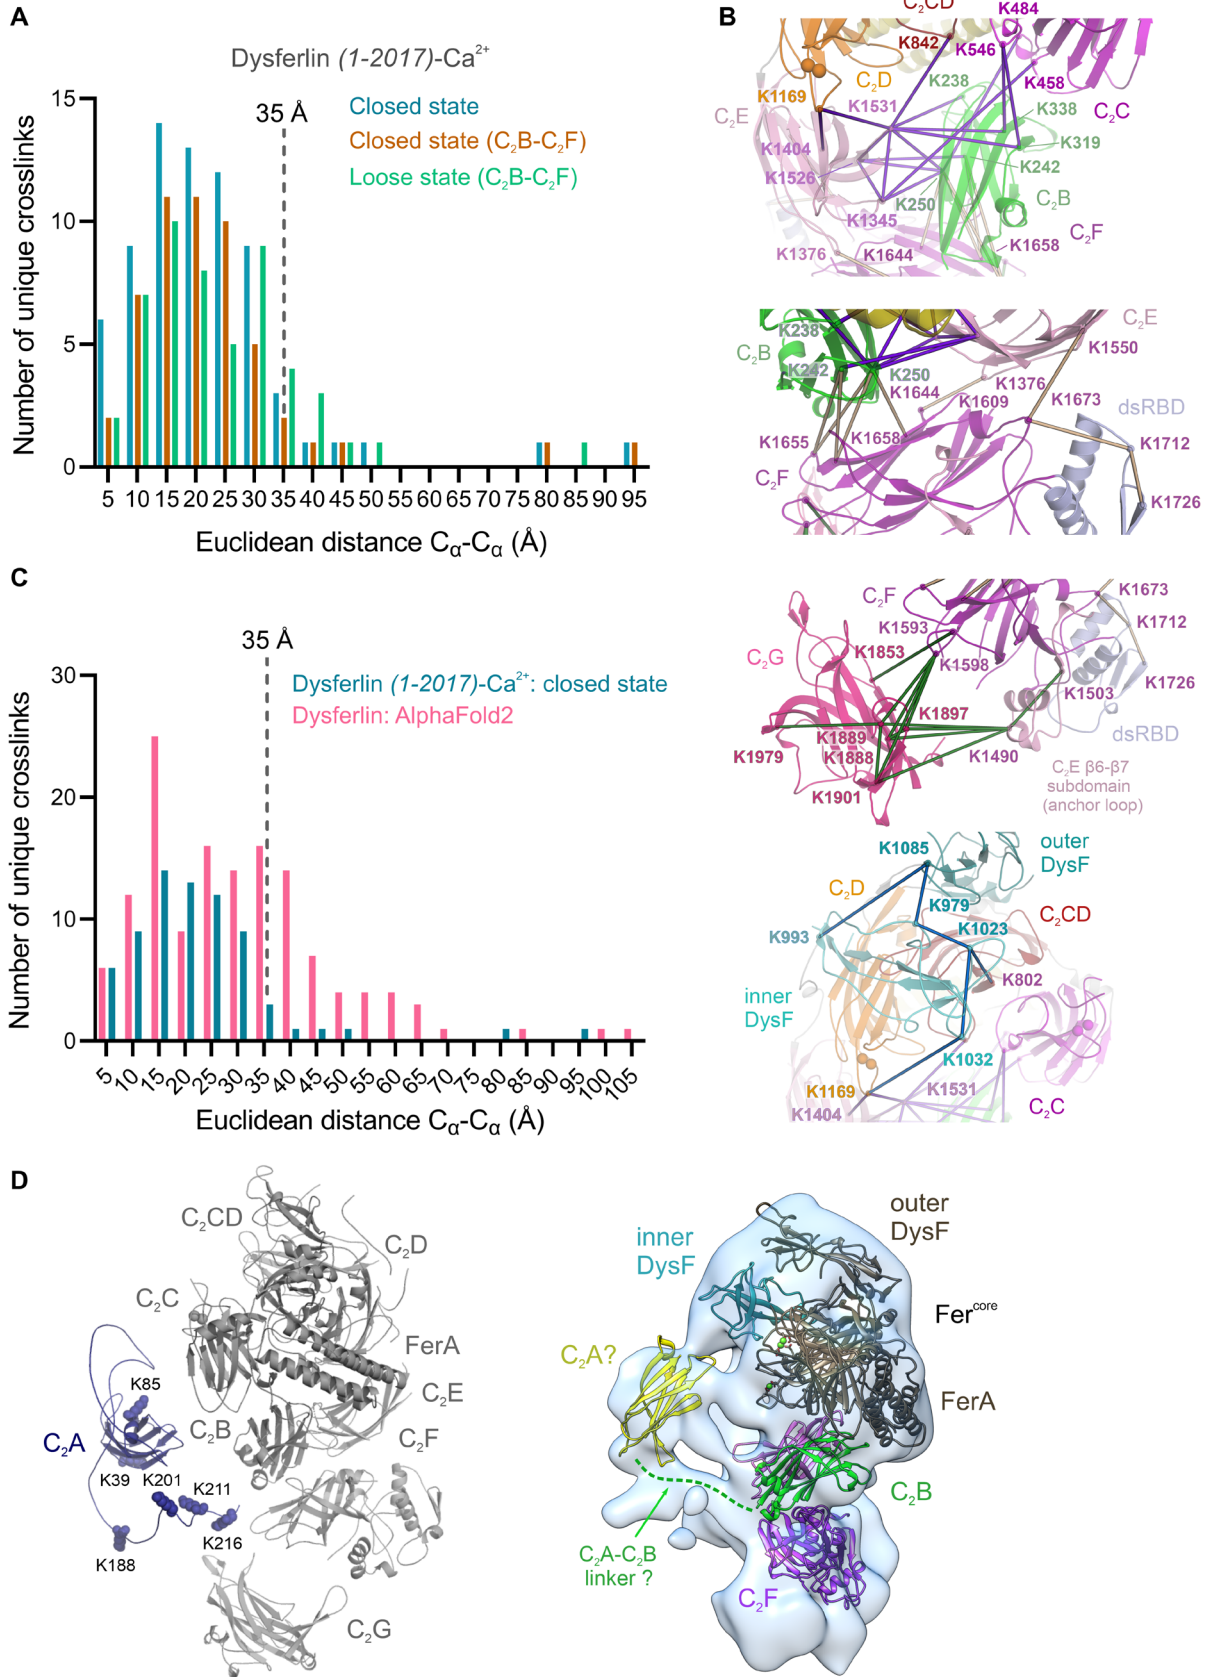

**Appendix Figure S14. Chemical-crosslinking mass spectrometry analysis of the Ca<sup>2+</sup>-bound soluble dysferlin (residues 1-2017).**

**A** Distribution of the C $\alpha$ -C $\alpha$  Euclidean distances between crosslinked lysine residues in the closed and loose dysferlin states (Appendix Fig 6A). Dysferlin's chemical crosslinking data indicate that when mapped onto the closed state model, ~93% of unique crosslinks occur between lysine residues less than 35 Å apart (Dataset EV1). Mapping to a loose state model lacking the dynamic C<sub>2</sub>G results in ~85% crosslinks satisfying the 35 Å distance threshold, consistent with the possibility that multiple dysferlin conformations coexist in solution.

**B** Selected chemical crosslinks between dysferlin's structural motifs. Euclidean distances were calculated between the C $\alpha$  atoms of crosslinked lysine residues in the closed dysferlin state and are depicted as coloured lines.

**C** Distribution of the crosslink distances in the closed state of soluble dysferlin (residues 1-2017, sDYSF) and a full-length dysferlin AlphaFold2 prediction (model 1, Appendix Fig S15B). Compared to the closed state model, only ~64.9% (37/57) unique crosslinks occur between residues less than 35 Å apart. The crosslink outliers map to the C<sub>2</sub>B-C<sub>2</sub>F, C<sub>2</sub>F-C<sub>2</sub>G, and C<sub>2</sub>A-C<sub>2</sub>B interfaces, indicating that the relative orientation of these domains is not accurately predicted in the AlphaFold2 model.

**D** BS3 crosslinks involving the flexible C<sub>2</sub>A and the C<sub>2</sub>A-C<sub>2</sub>B linker. The crosslinking data indicate that, although generally flexible, C<sub>2</sub>A likely samples a restricted number of conformations near the inner DysF and C<sub>2</sub>B. Notably, C<sub>2</sub>A could be accommodated by the unassigned density region, which continues from C<sub>2</sub>B towards the centre of dysferlin's (and myoferlin's) membrane-binding surface.

## Appendix Figure S15

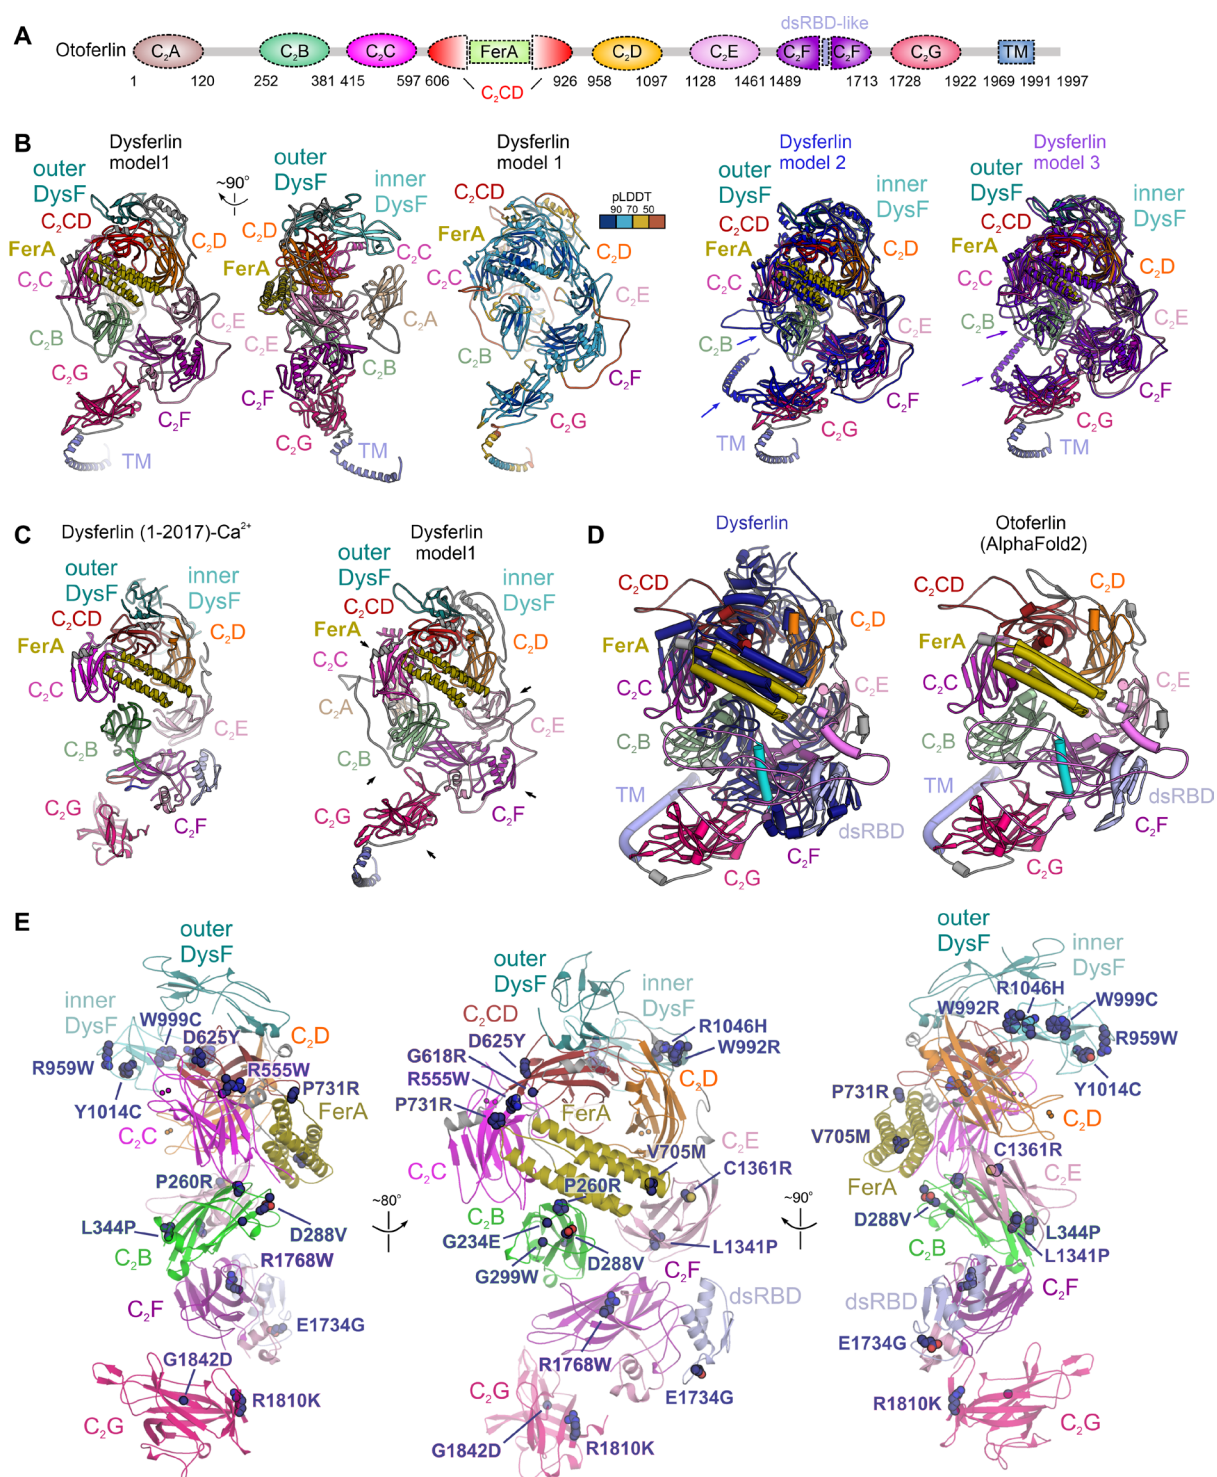

### Appendix Figure S15. Common organization principles of human ferlins.

**A** AlphaFold2-based domain composition schematic of human otoferlin (Jumper, Evans et al., 2021).

**B** AlphaFold2 models of human dysferlin. While the Fer<sup>core</sup> module is similar in these predictions, C<sub>2</sub>B, C<sub>2</sub>E, C<sub>2</sub>F, C<sub>2</sub>G, and the transmembrane region (TM) adopt alternative poses (marked by arrows), consistent with them being structurally dynamic. The long linkers connecting the C<sub>2</sub>A-C<sub>2</sub>B and C<sub>2</sub>E-C<sub>2</sub>F are likely unstructured, with pLDDT (predicted local distance difference test) scores <50.

**C** Comparison between dysferlin's closed state (Appendix Fig S6A) and an AlphaFold2 prediction (model 1) of full-length dysferlin. Note the significantly different poses of the C<sub>2</sub>B, C<sub>2</sub>E, C<sub>2</sub>F, and C<sub>2</sub>G domains (indicated by arrows, r.m.s.d.=4.85 over 1156 atoms). Minor differences are observed for the FerA domain. Conversely, the Fer<sup>core</sup> module (except the inner DysF motif) is similarly organized in the dysferlin cryo-EM structure and AlphaFold2 models (r.m.s.d.=1.79 over 618 atoms).

**D** Comparison between dysferlin's cryo-EM model and an AlphaFold2 prediction of human otoferlin. Otoferlin lacks the DysF motifs and the C<sub>2</sub>E anchor loop (magenta) is extended. In addition, C<sub>2</sub>B and C<sub>2</sub>E-C<sub>2</sub>F are arranged in a circular conformation – a configuration that appears reminiscent of the lipid-bound myoferlin structures (Fig 1C-D and Fig EV2).

**E** Pathogenic mutations mapped onto the lipid-free dysferlin structure. Pathogenic and likely pathogenic dysferlin substitutions were extracted from the ClinVar database (Landrum, Chitipiralla et al., 2020) and manually curated. Some dysferlin substitutions appear to cluster at tertiary interfaces, such as between C<sub>2</sub>C and C<sub>2</sub>CD (*e.g.*, R555W and D625Y).

**Appendix Table S1. Data collection, refinement, and validation statistics for the lipid-bound myoferlin (1-1997): 25 mol% DOPS and 5 mol% PI(4,5)P<sub>2</sub> nanodisc complex (PDB 9H6X/EMD-51902).**

|                                                               | Map M1<br>(consensus map) | Map M2    | Map M3<br>(overall map) |
|---------------------------------------------------------------|---------------------------|-----------|-------------------------|
| <b>Data collection and processing</b>                         | Dataset 1                 | Dataset 2 |                         |
| Electron gun                                                  | X-FEG                     | X-FEG     |                         |
| Detector                                                      | Falcon4i                  | Falcon4i  |                         |
| Magnification                                                 | 165,000                   | 165,000   |                         |
| Energy filter slit width (eV)                                 | 10                        | 10        |                         |
| Voltage (kV)                                                  | 300.0                     | 300.0     |                         |
| Dose rate (e <sup>-</sup> /Å <sup>2</sup> /s)                 | 12.53                     | 12.41     |                         |
| Electron exposure on sample (e <sup>-</sup> /Å <sup>2</sup> ) | 39.595                    | 39.216    |                         |
| Target defocus range (μm)                                     | 0.8-2.0                   | 0.8-2.3   |                         |
| Calibrated pixel size (Å)                                     | 0.72                      | 0.72      |                         |
| Symmetry imposed                                              | C1                        | C1        |                         |
| Collected movies (no.)                                        | 8,660                     | 22,379    |                         |
| Initial particle images (no.)                                 | 1,893,590                 | 5,758,253 |                         |
| Final particle images (no.)                                   | 1,585,485                 | 1,101,310 | 233,637                 |
| Map resolution at FSC=0.143 (Å)                               | 2.39                      | 2.46      | 2.56                    |
| <b>Refinement</b>                                             |                           |           |                         |
| Initial model used                                            | AlphaFold2                |           | AlphaFold2              |
| Model resolution (Å)                                          | 2.5                       |           | 2.8                     |
| Model resolution at FSC=0.5 (Å)                               | 2.65                      |           | 2.86                    |
| Map sharpening B factor (Å <sup>2</sup> )*                    | -90.7                     |           | -85.5                   |
| Model composition                                             |                           |           |                         |
| Non-hydrogen atoms                                            | 12,913                    |           | 13,813                  |
| Protein residues                                              | 1,585                     |           | 1,693                   |
| Ligands                                                       | 2x PS                     |           | 2x PS                   |
| Waters                                                        | -                         |           | -                       |
| Ions                                                          | 10x Ca <sup>2+</sup>      |           | 10x Ca <sup>2+</sup>    |
| <b>B factors (Å<sup>2</sup>)</b>                              |                           |           |                         |
| Protein (min/max/mean)                                        | 72.29/349.12/163.66       |           | 54.49/367.34/152.37     |
| Ligand (min/max/mean)                                         | 98.4/316.96/163.64        |           | 88.25/298.69/158.12     |
| Water                                                         | -                         |           | -                       |
| <b>R.m.s. deviations</b>                                      |                           |           |                         |
| Bond lengths (Å)                                              | 0.005                     |           | 0.004                   |
| Bond angles (°)                                               | 0.950                     |           | 0.840                   |
| <b>Validation</b>                                             |                           |           |                         |
| Molprobity score                                              | 1.24                      |           | 1.20                    |
| Clashscore                                                    | 1.79                      |           | 2.08                    |
| Rotamer outliers (%)                                          | 0.85                      |           | 0.86                    |
| Cβ outliers (%)                                               | -                         |           | -                       |
| CaBLAM outliers (%)                                           | 2.75                      |           | 2.16                    |
| Ramachandran plot                                             |                           |           |                         |
| Favored (%)                                                   | 95.61                     |           | 96.55                   |
| Allowed (%)                                                   | 4.32                      |           | 3.45                    |
| Disallowed (%)                                                | 0.06                      |           | -                       |

\*Automatically determined B factor; the maps were sharpened using LocScale and DeepEMhancer.

**Appendix Table S2. Data collection, refinement, and validation statistics for the lipid-bound myoferlin (1-1997): 25 mol% DOPS, 5 mol% PI(4,5)P<sub>2</sub> and 5 mol% cholesterol nanodisc complex (PDB 9QLF/EMD-53226).**

|                                                               | Map M4 A<br>(consensus map) | Map M4 C             | Map M4 B<br>(overall map) |
|---------------------------------------------------------------|-----------------------------|----------------------|---------------------------|
| <b>Data collection and processing</b>                         | Dataset 1                   | Dataset 2            |                           |
| Electron gun                                                  | X-FEG                       | X-FEG                |                           |
| Detector                                                      | Falcon4i                    | Falcon4i             |                           |
| Magnification                                                 | 165,000                     | 165,000              |                           |
| Energy filter slit width (eV)                                 | 10                          | 10                   |                           |
| Voltage (kV)                                                  | 300.0                       | 300.0                |                           |
| Dose rate (e <sup>-</sup> /Å <sup>2</sup> /s)                 | 10.99                       | 15.82                |                           |
| Electron exposure on sample (e <sup>-</sup> /Å <sup>2</sup> ) | 38.025                      | 38.917               |                           |
| Target defocus range (μm)                                     | 0.8-2.0                     | 0.8-2.0              |                           |
| Calibrated pixel size (Å)                                     | 0.72                        | 0.72                 |                           |
| Symmetry imposed                                              | C1                          | C1                   |                           |
| Collected movies (no.)                                        | 8,825                       | 12,511               |                           |
| Initial particle images (no.)                                 | 2,445,037                   | 2,594,384            |                           |
| Final particle images (no.)                                   | 882,916                     | 319,420              | 94,183                    |
| Map resolution at FSC=0.143 (Å)                               | 2.58                        | 2.65                 | 3.27                      |
| <b>Refinement</b>                                             |                             |                      |                           |
| Initial model used                                            | AlphaFold2                  | AlphaFold2           | AlphaFold2                |
| Model resolution (Å)                                          | 2.8                         | 3.0                  | 3.4                       |
| Model resolution at FSC=0.5 (Å)                               | 2.90                        | 2.89                 | 3.54                      |
| Map sharpening B factor (Å <sup>2</sup> )*                    | -100.7                      | -95.4                | -82.0                     |
| <b>Model composition</b>                                      |                             |                      |                           |
| Non-hydrogen atoms                                            | 12,901                      | 13,765               | 13,765                    |
| Protein residues                                              | 1,583                       | 1,687                | 1,687                     |
| Ligands                                                       | 2x PS                       | 2x PS                | 2x PS                     |
| Waters                                                        | -                           | -                    | -                         |
| Ions                                                          | 10x Ca <sup>2+</sup>        | 10x Ca <sup>2+</sup> | 10x Ca <sup>2+</sup>      |
| <b>B factors (Å<sup>2</sup>)</b>                              |                             |                      |                           |
| Protein (min/max/mean)                                        | 52.38/380.56/139.06         | 42.46/375.33/138.82  | 46.09/395.50/145.05       |
| Ligand (min/max/mean)                                         | 89.96/262.07/154.90         | 74.75/265.83/137.53  | 99.11/285.69/159.16       |
| Water                                                         | -                           | -                    | -                         |
| <b>R.m.s. deviations</b>                                      |                             |                      |                           |
| Bond lengths (Å)                                              | 0.005                       | 0.005                | 0.005                     |
| Bond angles (°)                                               | 0.968                       | 0.897                | 0.944                     |
| <b>Validation</b>                                             |                             |                      |                           |
| Molprobity score                                              | 1.43                        | 1.24                 | 1.49                      |
| Clashscore                                                    | 2.53                        | 1.76                 | 2.34                      |
| Rotamer outliers (%)                                          | 1.62                        | 1.33                 | 1.79                      |
| Cβ outliers (%)                                               | -                           | -                    | -                         |
| CaBLAM outliers (%)                                           | 2.12                        | 1.69                 | 1.75                      |
| <b>Ramachandran plot</b>                                      |                             |                      |                           |
| Favored (%)                                                   | 96.5                        | 96.65                | 95.88                     |
| Allowed (%)                                                   | 3.44                        | 3.35                 | 4.12                      |
| Disallowed (%)                                                | 0.06                        | -                    | -                         |

\*Automatically determined B factor

**Appendix Table S3. Data collection, refinement, and validation statistics for the lipid-bound myoferlin (1-1997): 15 mol% DOPS and 5 mol% cholesterol nanodisc complex (9QKV/EMD-53222).**

|                                                               | Map M5<br>(consensus map) | Map M6<br>(overall map) |
|---------------------------------------------------------------|---------------------------|-------------------------|
| <b>Data collection and processing</b>                         |                           |                         |
| Electron gun                                                  | X-FEG                     |                         |
| Detector                                                      | Falcon4i                  |                         |
| Magnification                                                 | 165,000                   |                         |
| Energy filter slit width (eV)                                 | 10                        |                         |
| Voltage (kV)                                                  | 300.0                     |                         |
| Dose rate (e <sup>-</sup> /Å <sup>2</sup> /s)                 | 11.55                     |                         |
| Electron exposure on sample (e <sup>-</sup> /Å <sup>2</sup> ) | 39.848                    |                         |
| Target defocus range (μm)                                     | 0.8-2.0                   |                         |
| Calibrated pixel size (Å)                                     | 0.72                      |                         |
| Symmetry imposed                                              | C1                        |                         |
| Collected movies (no.)                                        | 9,621                     |                         |
| Initial particle images (no.)                                 | 2,917,286                 |                         |
| Final particle images (no.)                                   | 277,729                   | 38,088                  |
| Map resolution at FSC=0.143 (Å)                               | 2.74                      | 3.29                    |
| <b>Refinement</b>                                             |                           |                         |
| Initial model used                                            | AlphaFold2                | AlphaFold2              |
| Model resolution (Å)                                          | 3.0                       | 3.4                     |
| Model resolution at FSC=0.5 (Å)                               | 3.1                       | 3.6                     |
| Map sharpening B factor (Å <sup>2</sup> )*                    | -97.7                     | -63.9                   |
| <b>Model composition</b>                                      |                           |                         |
| Non-hydrogen atoms                                            | 13,766                    | 13,766                  |
| Protein residues                                              | 1,688                     | 1,688                   |
| Ligands                                                       | 2x PS                     | 2x PS                   |
| Waters                                                        | -                         | -                       |
| Ions                                                          | 10x Ca <sup>2+</sup>      | 10x Ca <sup>2+</sup>    |
| <b>B factors (Å<sup>2</sup>)</b>                              |                           |                         |
| Protein (min/max/mean)                                        | 32.54/361.56/122.53       | 56.5/364.23/149.37      |
| Ligand (min/max/mean)                                         | 60.97/252.15/114.85       | 97.92/313.94/165.12     |
| Water                                                         | -                         | -                       |
| <b>R.m.s. deviations</b>                                      |                           |                         |
| Bond lengths (Å)                                              | 0.005                     | 0.005                   |
| Bond angles (°)                                               | 0.970                     | 1.018                   |
| <b>Validation</b>                                             |                           |                         |
| Molprobity score                                              | 1.24                      | 1.38                    |
| Clashscore                                                    | 2.01                      | 2.60                    |
| Rotamer outliers (%)                                          | 0.73                      | 1.33                    |
| Cβ outliers (%)                                               | -                         | 0.13                    |
| CaBLAM outliers (%)                                           | 1.69                      | 2.59                    |
| <b>Ramachandran plot</b>                                      |                           |                         |
| Favored (%)                                                   | 96.06                     | 96.36                   |
| Allowed (%)                                                   | 3.88                      | 3.58                    |
| Disallowed (%)                                                | 0.06                      | 0.06                    |

\*Automatically determined B factor



**Appendix Table S4. Data collection, refinement, and validation statistics for the lipid-bound myoferlin (1-1997): 15 mol% DOPS and 2 mol% PI(4,5)P<sub>2</sub> nanodisc (9QLE/EMD-53225).**

|                                                               | Map M7<br>(consensus map) | Map M8<br>(overall map) |
|---------------------------------------------------------------|---------------------------|-------------------------|
| <b>Data collection and processing</b>                         |                           |                         |
| Electron gun                                                  | X-FEG                     |                         |
| Detector                                                      | Falcon4i                  |                         |
| Magnification                                                 | 165,000                   |                         |
| Energy filter slit width (eV)                                 | 10                        |                         |
| Voltage (kV)                                                  | 300.0                     |                         |
| Dose rate (e <sup>-</sup> /Å <sup>2</sup> /s)                 | 11.53                     |                         |
| Electron exposure on sample (e <sup>-</sup> /Å <sup>2</sup> ) | 39.894                    |                         |
| Target defocus range (μm)                                     | 1.1-2.0                   |                         |
| Calibrated pixel size (Å)                                     | 0.72                      |                         |
| Symmetry imposed                                              | C1                        |                         |
| Collected movies (no.)                                        | 7,014                     |                         |
| Initial particle images (no.)                                 | 2,484,379                 |                         |
| Final particle images (no.)                                   | 583,145                   | 28,855                  |
| Map resolution at FSC=0.143 (Å)                               | 2.79                      | 3.43                    |
| <b>Refinement</b>                                             |                           |                         |
| Initial model used                                            | AlphaFold2                | AlphaFold2              |
| Model resolution (Å)                                          | 3.0                       | 3.6                     |
| Model resolution at FSC=0.5 (Å)                               | 3.12                      | 3.82                    |
| Map sharpening B factor (Å <sup>2</sup> )*                    | -107.9                    | -66.9                   |
| <b>Model composition</b>                                      |                           |                         |
| Non-hydrogen atoms                                            | 13,823                    | 13,823                  |
| Protein residues                                              | 1,695                     | 1,695                   |
| Ligands                                                       | 2x PS                     | 2x PS                   |
| Waters                                                        | -                         | -                       |
| Ions                                                          | 10x Ca <sup>2+</sup>      | 10x Ca <sup>2+</sup>    |
| <b>B factors (Å<sup>2</sup>)</b>                              |                           |                         |
| Protein (min/max/mean)                                        | 46.58/437.76/135.50       | 80.52/339.96/142.26     |
| Ligand (min/max/mean)                                         | 87.60/224.29/132.75       | 112.33/233.83/147.31    |
| Water                                                         | -                         | -                       |
| <b>R.m.s. deviations</b>                                      |                           |                         |
| Bond lengths (Å)                                              | 0.004                     | 0.005                   |
| Bond angles (°)                                               | 0.965                     | 1.003                   |
| <b>Validation</b>                                             |                           |                         |
| Molprobity score                                              | 1.26                      | 1.43                    |
| Clashscore                                                    | 1.71                      | 2.62                    |
| Rotamer outliers (%)                                          | 1.52                      | 1.26                    |
| Cβ outliers (%)                                               | -                         | -                       |
| CaBLAM outliers (%)                                           | 1.86                      | 2.45                    |
| <b>Ramachandran plot</b>                                      |                           |                         |
| Favored (%)                                                   | 96.79                     | 95.66                   |
| Allowed (%)                                                   | 3.21                      | 4.28                    |
| Disallowed (%)                                                | -                         | 0.06                    |

\*Automatically determined B factor

**Appendix Table S5. Data collection, refinement, and validation statistics for the lipid-free soluble myoferlin (residues 1-1997, PDB 9QLN/EMD-53229).**

|                                                               | Map M9<br>(consensus map) | Map M10<br>(Fer <sup>core</sup> ) | Map M11<br>(overall map) |
|---------------------------------------------------------------|---------------------------|-----------------------------------|--------------------------|
| <b>Data collection and processing</b>                         | Dataset 1                 | Dataset 2                         |                          |
| Electron gun                                                  | X-FEG                     | X-FEG                             |                          |
| Detector                                                      | Falcon4i                  | Falcon4i                          |                          |
| Magnification                                                 | 165,000                   | 165,000                           |                          |
| Energy filter slit width (eV)                                 | 10                        | 10                                |                          |
| Voltage (kV)                                                  | 300.0                     | 300.0                             |                          |
| Dose rate (e <sup>-</sup> /Å <sup>2</sup> /s)                 | 11.67                     | 10.8                              |                          |
| Electron exposure on sample (e <sup>-</sup> /Å <sup>2</sup> ) | 39.911                    | 39.852                            |                          |
| Target defocus range (μm)                                     | 1.1-2.3                   | 0.8-2.0                           |                          |
| Calibrated pixel size (Å)                                     | 0.72                      | 0.72                              |                          |
| Symmetry imposed                                              | C1                        | C1                                |                          |
| Collected movies (no.)                                        | 10,354                    | 8,669                             |                          |
| Initial particle images (no.)                                 | 6,088,884                 | 3,020,482                         |                          |
| Final particle images (no.)                                   | 102,339                   | 298,755                           | 18,157                   |
| Map resolution at FSC=0.143 (Å)                               | 3.21                      | 2.81                              | 8.5                      |
| <b>Refinement</b>                                             |                           |                                   |                          |
| Initial model used                                            | AlphaFold2                |                                   |                          |
| Model resolution (Å)                                          | 3.4                       |                                   |                          |
| Model resolution at FSC=0.5 (Å)                               | 3.73                      |                                   |                          |
| Map sharpening B factor (Å <sup>2</sup> )*                    | -91.9                     |                                   |                          |
| Model composition                                             |                           |                                   |                          |
| Non-hydrogen atoms                                            | 10,833                    |                                   |                          |
| Protein residues                                              | 1,340                     |                                   |                          |
| Ligands                                                       | -                         |                                   |                          |
| Waters                                                        | -                         |                                   |                          |
| Ions                                                          | 6x Ca <sup>2+</sup>       |                                   |                          |
| <i>B</i> factors (Å <sup>2</sup> )                            |                           |                                   |                          |
| Protein (min/max/mean)                                        | 29.97/419.31/167.9        |                                   |                          |
| Ligand (min/max/mean)                                         | 95.77/336.41/180.97       |                                   |                          |
| Water                                                         | -                         |                                   | -                        |
| R.m.s. deviations                                             |                           |                                   |                          |
| Bond lengths (Å)                                              | 0.005                     |                                   |                          |
| Bond angles (°)                                               | 1.002                     |                                   |                          |
| <b>Validation</b>                                             |                           |                                   |                          |
| Molprobity score                                              | 1.51                      |                                   |                          |
| Clashscore                                                    | 3.06                      |                                   |                          |
| Rotamer outliers (%)                                          | 1.34                      |                                   |                          |
| Cβ outliers (%)                                               | -                         |                                   |                          |
| CaBLAM outliers (%)                                           | 2.74                      |                                   |                          |
| Ramachandran plot                                             |                           |                                   |                          |
| Favored (%)                                                   | 95.48                     |                                   |                          |
| Allowed (%)                                                   | 4.45                      |                                   |                          |
| Disallowed (%)                                                | 0.08                      |                                   |                          |

\*Automatically determined B factor; the maps were sharpened using LocScale.

**Appendix Table S6. Data collection, refinement, and validation statistics for the lipid-free soluble dysferlin (residues 1-2017, PDB 9QLS, EMD-53233).**

|                                                               | Map M1<br>(Fer <sup>core</sup> map) | Map M2<br>(closed state) | Map M3<br>(overall map) |
|---------------------------------------------------------------|-------------------------------------|--------------------------|-------------------------|
| <b>Data collection and processing</b>                         | Dataset 1                           | Dataset 2                |                         |
| Electron gun                                                  | X-FEG                               | XFEG                     |                         |
| Detector                                                      | Falcon4i                            | Falcon4i                 |                         |
| Magnification                                                 | 165,000                             | 165,000                  |                         |
| Energy filter slit width (eV)                                 | 15                                  | 10                       |                         |
| Voltage (kV)                                                  | 300.0                               | 300.0                    |                         |
| Dose rate (e <sup>-</sup> /Å <sup>2</sup> /s)                 | 13.35                               | 13.59                    |                         |
| Electron exposure on sample (e <sup>-</sup> /Å <sup>2</sup> ) | 40.184                              | 40.227                   |                         |
| Target defocus range (μm)                                     | 0.8-2.3                             | 0.8-2.3                  |                         |
| Calibrated pixel size (Å)                                     | 0.72                                | 0.72                     |                         |
| Symmetry imposed                                              | C1                                  | C1                       |                         |
| Collected movies (no.)                                        | 4,582                               | 4,727                    |                         |
| Initial particle images (no.)                                 | 1,660,317                           | 1,201,065                |                         |
| Final particle images (no.)                                   | 230,540                             | 29,793                   | 11,477                  |
| Map resolution at FSC=0.143 (Å)                               | 2.92                                | 3.54                     | 4.76                    |
| <b>Refinement</b>                                             |                                     |                          |                         |
| Initial model used                                            |                                     | AlphaFold2               |                         |
| Model resolution (Å)                                          |                                     | 3.6                      |                         |
| Model resolution at FSC=0.5 (Å)                               |                                     | 3.81                     |                         |
| Map sharpening B factor (Å <sup>2</sup> )*                    |                                     | -56.9                    |                         |
| Model composition                                             |                                     |                          |                         |
| Non-hydrogen atoms                                            |                                     | 11,100                   |                         |
| Protein residues                                              |                                     | 1,370                    |                         |
| Ligands                                                       |                                     | -                        |                         |
| Waters                                                        |                                     | -                        |                         |
| Ions                                                          |                                     | 6x Ca <sup>2+</sup>      |                         |
| <br><i>B</i> factors (Å <sup>2</sup> )                        |                                     |                          |                         |
| Protein (min/max/mean)                                        |                                     | 45.60/370.52/173.98      |                         |
| Ligand (min/max/mean)                                         |                                     | 75.34/297.09/150.49      |                         |
| Water                                                         |                                     | -                        |                         |
| R.m.s. deviations                                             |                                     |                          |                         |
| Bond lengths (Å)                                              |                                     | 0.004                    |                         |
| Bond angles (°)                                               |                                     | 0.982                    |                         |
| <b>Validation</b>                                             |                                     |                          |                         |
| Molprobity score                                              |                                     | 1.54                     |                         |
| Clashscore                                                    |                                     | 2.68                     |                         |
| Rotamer outliers (%)                                          |                                     | 1.57                     |                         |
| Cβ outliers (%)                                               |                                     | -                        |                         |
| CaBLAM outliers (%)                                           |                                     | 2.19                     |                         |
| Ramachandran plot                                             |                                     |                          |                         |
| Favored (%)                                                   |                                     | 95.17                    |                         |
| Allowed (%)                                                   |                                     | 4.75                     |                         |
| Disallowed (%)                                                |                                     | 0.07                     |                         |

\*Automatically determined B factor; the maps were sharpened using LocScale.

**Appendix Table S7. PCR primers used in this study.**

| Primer    | Sequence (5'-3')                                         | Construct    |
|-----------|----------------------------------------------------------|--------------|
| CC10_REV  | GTCTTCCAACCTGGGGTTCATGTTAG (RH)                          | pCC17, pCC18 |
| CC11_FWD  | TGAGGTACCAAGCTTGTCGAGAAGTAC (RH)                         | pCC17, pCC18 |
| CC14_FWD  | TCTCCTCCTTCATCCCTCACGA (RH)                              | pCC19        |
| CC15_REV  | TCCAGGACCTTGGAACAGCACCTCCAG (RH)                         | pCC19        |
| CC34_REV  | CATGCCACCGGATCCGCCACCTG (RH)                             | pCC26        |
| CC35_FWD  | AGCGACAAGCCCCAAGACTTCCAG (RH)                            | pCC26        |
| CC70_FWD  | GGAAGCGGAAACGGAACGCCAAGGTCCACAGGAATGCT (RH)              | pCC48        |
| CC69_REV  | GAAGTCAGACAAACCTCGAAGGCTTCC (RH)                         | pCC48        |
| CC104_FWD | TACTTCCAATCCAATGCAATGCTGCGAGTGATTGTGGAATCTG (LIC)        | pCC68        |
| CC105_REV | TTATCCACTTCCAATGTTATTACACATTTGGCTTTACAATCTTCATTGAC (LIC) | pCC68        |
| CC117_REV | CTTCTCGCGCTGGATCAGTTCGAAAGAG (+CC11_FWD, RH)             | pCC75        |
| CC118_REV | GTCCAGCTTGGGGTTCATGTTGGGTTC (RH)                         | pCC76        |
| CC119_FWD | TAATAACATTGGAAGTGGATAACCGGTCCGA (RH)                     | pCC76        |
| CC121_FWD | CGTCGCCCCCTTCGTGGAAGTCTCTTTCGCTG (RH)                    | pCC95        |
| CC122_REV | AGGTTCTTCTTGTAGACTCGAAGCCGAAG (RH)                       | pCC95        |
| CC123_FWD | CAACGCCATCGTCGCCACCACTTACCTGTC (RH)                      | pCC94        |
| CC125_REV | TGAGTCAACCTGTCCCAGGCGATGATCCTG (RH)                      | pCC94        |
| CC126_FWD | CTATGGCCAAGGACTCTTTCAGCGCCCCATACGC (RH)                  | pCC84        |
| CC127_REV | CAGCCAAGTCGCGGGCTTGGTAC (RH)                             | pCC84        |
| CC128_FWD | GCTGTACGCCACGCCACCTACGGCGCCGAC (RH)                      | pCC85, pCC90 |
| CC129_REV | TCGACCACGATTGAAGGTGGCTGCTCG (RH)                         | pCC85, pCC90 |

RH – “around-the-horn” PCR (using 5’-phosphorylated primers); LIC – ligation-independent cloning

## References

- Hirano Y, Gao YG, Stephenson DJ, Vu NT, Malinina L, Simanshu DK, Chalfant CE, Patel DJ, Brown RE (2019) Structural basis of phosphatidylcholine recognition by the C2-domain of cytosolic phospholipase A2 $\alpha$ . *Elife* 8
- Jumper J, Evans R, Pritzel A, Green T, Figurnov M, Ronneberger O, Tunyasuvunakool K, Bates R, Zidek A, Potapenko A, Bridgland A, Meyer C, Kohl SAA, Ballard AJ, Cowie A, Romera-Paredes B, Nikolov S, Jain R, Adler J, Back T et al. (2021) Highly accurate protein structure prediction with AlphaFold. *Nature* 596: 583-589
- Landrum MJ, Chitipiralla S, Brown GR, Chen C, Gu B, Hart J, Hoffman D, Jang W, Kaur K, Liu C, Lyoshin V, Maddipatla Z, Maiti R, Mitchell J, O'Leary N, Riley GR, Shi W, Zhou G, Schneider V, Maglott D et al. (2020) ClinVar: improvements to accessing data. *Nucleic Acids Res* 48: D835-D844
- Patel P, Harris R, Geddes SM, Strehle EM, Watson JD, Bashir R, Bushby K, Driscoll PC, Keep NH (2008) Solution structure of the inner DysF domain of myoferlin and implications for limb girdle muscular dystrophy type 2b. *J Mol Biol* 379: 981-990
- Sula A, Cole AR, Yeats C, Orengo C, Keep NH (2014) Crystal structures of the human Dysferlin inner DysF domain. *BMC Struct Biol* 14: 3
- van Kempen M, Kim SS, Tumescheit C, Mirdita M, Lee J, Gilchrist CLM, Soding J, Steinegger M (2024) Fast and accurate protein structure search with Foldseek. *Nat Biotechnol* 42: 243-246
