# Supplementary material for: Structural insights into lipid membrane binding by human ferlins
Source: EMBO J. 2025 May 28;44(14):3926–58. doi: 10.1038/s44318-025-00463-8 (PMC12264198; doi:10.1038/s44318-025-00463-8)
Supplement: Supplementary file 3 — Dataset EV1 [file 44318_2025_463_MOESM3_ESM.xlsx]

## Sheet: Notes
Dataset EV1.
Identified peptides and descriptive statistics for the chemical crosslinking data of Ca2+-bound human dysferlin (residues 1-2017).
Euclidean distances were computed between the Cα atoms of the BS3-crosslinked residues modelled in dysferlin's structure.
"Intra-Protein" denotes intramolecular BS3 crosslinks and a higher score indicates a higher confidence of crosslink identification.

## Sheet: DYSF_BS3_crosslinks_fraction14
	Charge	Precursor_Mass	Peptide	Peptide_Type	Linker	Peptide_Mass	Modifications	Evalue	Ori_Score	Precursor_Mass_Error.Da.	Precursor_Mass_Error.ppm.	Proteins	Protein_Type	FileID	LabelID	Alpha_Matched	Beta_Matched	Alpha_Evalue	Beta_Evalue	Score	Protein1	LinkPos1	Protein2	LinkPos2	AbsPos1	AbsPos2	PepPos1	PepPos2	PepSeq1	PepSeq2
1	5	2217.2	LDKTESKIPAR(3)-KDAFWR(1)	Cross-Linked	BS3	2217.2	null	1.1e-13	1.46e-07	0.001236	0.557459	sDYSF(1944)-sDYSF(1936)/	Intra-Protein	1	1	19.5	13.5	3.2e-12	5.52e-12	6.83565	sDYSF	3	sDYSF	1	1944	1936	1942	1936	LDKTESKIPAR	KDAFWR
2	3	1780	LDKTESK(3)-KDAFWR(1)	Cross-Linked	BS3	1780	null	2.13e-13	1.57e-07	0.000321	0.180344	sDYSF(1944)-sDYSF(1936)/	Intra-Protein	1	1	14	10	4.65e-13	2.87e-11	6.8041	sDYSF	3	sDYSF	1	1944	1936	1942	1936	LDKTESK	KDAFWR
3	5	2220	LDKTESKIPAR(3)-KDAFWR(1)	Cross-Linked	BS3	2220	null	4.43e-13	2.69e-07	0.00095	0.428468	sDYSF(1944)-sDYSF(1936)/	Intra-Protein	1	1	18.5	11.5	9.02e-13	3.57e-14	6.57025	sDYSF	3	sDYSF	1	1944	1936	1942	1936	LDKTESKIPAR	KDAFWR
4	3	3980	GKTQEETEDPSVIGEFK(2)-EELYCPPITVKVIDNR(11)	Cross-Linked	BS3	3980	Carbamidomethyl[C](25)	6.92e-11	3.01e-07	0.001048	0.263517	sDYSF(1578)-sDYSF(1451)/	Intra-Protein	1	1	21	31	7.39e-14	2.54e-13	6.52143	sDYSF	2	sDYSF	11	1578	1451	1577	1441	GKTQEETEDPSVIGEFK	EELYCPPITVKVIDNR
5	4	2220	LDKTESKIPAR(3)-KDAFWR(1)	Cross-Linked	BS3	2220	null	2.28e-18	3.29e-07	0.00124	0.559263	sDYSF(1944)-sDYSF(1936)/	Intra-Protein	1	1	27.5	14.5	1.65e-16	1.09e-12	6.4828	sDYSF	3	sDYSF	1	1944	1936	1942	1936	LDKTESKIPAR	KDAFWR
6	4	2220	LDKTESKIPAR(3)-KDAFWR(1)	Cross-Linked	BS3	2220	null	1.53e-13	3.63e-07	0.001352	0.609777	sDYSF(1944)-sDYSF(1936)/	Intra-Protein	1	1	31.5	16.5	2.83e-13	6.42e-16	6.44009	sDYSF	3	sDYSF	1	1944	1936	1942	1936	LDKTESKIPAR	KDAFWR
7	4	3520	KWLLLSDPDDFSAGAR(1)-KLLSDKPQDFQIR(1)	Cross-Linked	BS3	3520	null	1.95e-07	4.47e-07	0.000108	0.030718	sDYSF(366)-sDYSF(258)/	Intra-Protein	1	1	25.5	16.5	4.68e-10	2.7e-07	6.34969	sDYSF	1	sDYSF	1	366	258	366	258	KWLLLSDPDDFSAGAR	KLLSDKPQDFQIR
8	3	2960	GKTQEETEDPSVIGEFK(2)-VTAAGQTKR(8)	Cross-Linked	BS3	2960	null	5.86e-14	4.71e-07	-0.000141	-0.047595	sDYSF(1578)-sDYSF(297)/	Intra-Protein	1	1	33	20	2.98e-40	9.66e-12	6.32698	sDYSF	2	sDYSF	8	1578	297	1577	290	GKTQEETEDPSVIGEFK	VTAAGQTKR
9	4	1780	LDKTESK(3)-KDAFWR(1)	Cross-Linked	BS3	1780	null	1.37e-10	4.76e-07	6.6e-05	0.03708	sDYSF(1944)-sDYSF(1936)/	Intra-Protein	1	1	10	13	5.78e-10	6.78e-08	6.32239	sDYSF	3	sDYSF	1	1944	1936	1942	1936	LDKTESK	KDAFWR
10	3	2220	LDKTESKIPAR(3)-KDAFWR(1)	Cross-Linked	BS3	2220	null	1.74e-19	5.96e-07	0.00189	0.852426	sDYSF(1944)-sDYSF(1936)/	Intra-Protein	1	1	24	10	4.28e-17	1.11e-18	6.22475	sDYSF	3	sDYSF	1	1944	1936	1942	1936	LDKTESKIPAR	KDAFWR
11	4	2510	LDKTESKIPAR(3)-EKCGSYLEK(2)	Cross-Linked	BS3	2510	Carbamidomethyl[C](17)	5.21e-15	7.41e-07	0.000276	0.110035	sDYSF(1944)-sDYSF(1537)/	Intra-Protein	1	1	18	15	7.22e-19	2.84e-09	6.13018	sDYSF	3	sDYSF	2	1944	1537	1942	1536	LDKTESKIPAR	EKCGSYLEK
12	4	3980	GKTQEETEDPSVIGEFK(2)-EELYCPPITVKVIDNR(11)	Cross-Linked	BS3	3980	Carbamidomethyl[C](25)	3.86e-16	8.54e-07	0.0013	0.326882	sDYSF(1578)-sDYSF(1451)/	Intra-Protein	1	1	28	31	5.11e-20	1.9e-14	6.06854	sDYSF	2	sDYSF	11	1578	1451	1577	1441	GKTQEETEDPSVIGEFK	EELYCPPITVKVIDNR
13	4	1780	LDKTESK(3)-KDAFWR(1)	Cross-Linked	BS3	1780	null	7.14e-11	1.06e-06	6.4e-05	0.035957	sDYSF(1944)-sDYSF(1936)/	Intra-Protein	1	1	12	11	1.26e-10	1.02e-07	5.97469	sDYSF	3	sDYSF	1	1944	1936	1942	1936	LDKTESK	KDAFWR
14	4	2750	KWLLLSDPDDFSAGAR(1)-KDPSEDK(1)	Cross-Linked	BS3	2750	null	5.13e-10	1.07e-06	0.003429	1.24856	sDYSF(366)-sDYSF(402)/	Intra-Protein	1	1	31	8	7.23e-17	7.45e-10	5.97062	sDYSF	1	sDYSF	1	366	402	366	402	KWLLLSDPDDFSAGAR	KDPSEDK
15	4	3540	FIFPFDYLPAEQVCTIAKK(18)-EKCGSYLEK(2)	Cross-Linked	BS3	3540	Carbamidomethyl[C](14);Carbamidomethyl[C](25)	2.3e-13	2.07e-06	-0.000671	-0.189668	sDYSF(1935)-sDYSF(1537)/	Intra-Protein	1	1	40.5	12.5	4.36e-22	6.2e-14	5.68403	sDYSF	18	sDYSF	2	1935	1537	1918	1536	FIFPFDYLPAEQVCTIAKK	EKCGSYLEK
16	4	5360	NMKSYQLANISSPSLVVECGGQTVQSCVIR(3)-GKTQEETEDPSVIGEFK(2)	Cross-Linked	BS3	5360	Carbamidomethyl[C](19);Carbamidomethyl[C](27)	7.01e-15	2.38e-06	-0.001745	-0.325766	sDYSF(1392)-sDYSF(1578)/	Intra-Protein	1	1	47	21	2.32e-24	7.48e-16	5.62342	sDYSF	3	sDYSF	2	1392	1578	1390	1577	NMKSYQLANISSPSLVVECGGQTVQSCVIR	GKTQEETEDPSVIGEFK
17	3	2220	LDKTESKIPAR(3)-KDAFWR(1)	Cross-Linked	BS3	2220	null	2.25e-13	3.04e-06	0.001878	0.847013	sDYSF(1944)-sDYSF(1936)/	Intra-Protein	1	1	25.5	11.5	5.55e-21	1.63e-13	5.51713	sDYSF	3	sDYSF	1	1944	1936	1942	1936	LDKTESKIPAR	KDAFWR
18	4	2220	LDKTESKIPAR(7)-KDAFWR(1)	Cross-Linked	BS3	2220	null	1.17e-10	3.1e-06	0.001019	0.459588	sDYSF(1948)-sDYSF(1936)/	Intra-Protein	1	1	25.5	12.5	9.32e-11	2.85e-12	5.50864	sDYSF	7	sDYSF	1	1948	1936	1942	1936	LDKTESKIPAR	KDAFWR
19	4	1780	LDKTESK(3)-KDAFWR(1)	Cross-Linked	BS3	1780	null	2.63e-08	3.38e-06	6.6e-05	0.03708	sDYSF(1944)-sDYSF(1936)/	Intra-Protein	1	1	11	9	2.34e-08	1.4e-06	5.47108	sDYSF	3	sDYSF	1	1944	1936	1942	1936	LDKTESK	KDAFWR
20	4	1780	LDKTESK(3)-KDAFWR(1)	Cross-Linked	BS3	1780	null	3.25e-09	3.4e-06	5e-05	0.028091	sDYSF(1944)-sDYSF(1936)/	Intra-Protein	1	1	10	10	9.04e-09	3.19e-07	5.46852	sDYSF	3	sDYSF	1	1944	1936	1942	1936	LDKTESK	KDAFWR
21	4	1780	LDKTESK(3)-KDAFWR(1)	Cross-Linked	BS3	1780	null	6.66e-09	3.7e-06	0.000167	0.093824	sDYSF(1944)-sDYSF(1936)/	Intra-Protein	1	1	9	9	2.52e-08	2.33e-07	5.4318	sDYSF	3	sDYSF	1	1944	1936	1942	1936	LDKTESK	KDAFWR
22	4	4840	DLAAMDKDSFSDPYAIVSFLHQSQK(7)-GKTQEETEDPSVIGEFK(2)	Cross-Linked	BS3	4840	null	1.85e-15	4.2e-06	0.000489	0.100943	sDYSF(1216)-sDYSF(1578)/	Intra-Protein	1	1	42.5	29.5	2.47e-22	3.27e-16	5.37675	sDYSF	7	sDYSF	2	1216	1578	1210	1577	DLAAMDKDSFSDPYAIVSFLHQSQK	GKTQEETEDPSVIGEFK
23	3	1780	LDKTESK(3)-KDAFWR(1)	Cross-Linked	BS3	1780	null	5.39e-12	5.82e-06	0.000368	0.20675	sDYSF(1944)-sDYSF(1936)/	Intra-Protein	1	1	13	10	6.31e-12	2.63e-14	5.23508	sDYSF	3	sDYSF	1	1944	1936	1942	1936	LDKTESK	KDAFWR
24	5	4420	GKTQEETEDPSVIGEFKGLFK(2)-EELYCPPITVKVIDNR(11)	Cross-Linked	BS3	4420	Carbamidomethyl[C](29)	9.54e-12	6e-06	0.000622	0.140653	sDYSF(1578)-sDYSF(1451)/	Intra-Protein	1	1	31	28	2.67e-13	1.88e-10	5.22185	sDYSF	2	sDYSF	11	1578	1451	1577	1441	GKTQEETEDPSVIGEFKGLFK	EELYCPPITVKVIDNR
25	4	3450	DLKITLYDYDLLSK(3)-DEKIGETVVDLENR(3)	Cross-Linked	BS3	3450	null	3e-07	6.97e-06	0.002836	0.821127	sDYSF(1691)-sDYSF(1705)/	Intra-Protein	1	1	19	20	1.32e-07	5.31e-10	5.15677	sDYSF	3	sDYSF	3	1691	1705	1689	1703	DLKITLYDYDLLSK	DEKIGETVVDLENR
26	3	1780	LDKTESK(3)-KDAFWR(1)	Cross-Linked	BS3	1780	null	1.28e-12	7.83e-06	0.000416	0.233717	sDYSF(1944)-sDYSF(1936)/	Intra-Protein	1	1	13.5	10.5	5.03e-12	1.33e-08	5.10624	sDYSF	3	sDYSF	1	1944	1936	1942	1936	LDKTESK	KDAFWR
27	4	2220	LDKTESKIPAR(3)-KDAFWR(1)	Cross-Linked	BS3	2220	null	1.03e-10	8.15e-06	0.001428	0.644055	sDYSF(1944)-sDYSF(1936)/	Intra-Protein	1	1	13.5	8.5	7.14e-10	6.06e-08	5.08884	sDYSF	3	sDYSF	1	1944	1936	1942	1936	LDKTESKIPAR	KDAFWR
28	5	2560	KLLSDKPQDFQIR(1)-VKAPVYR(2)	Cross-Linked	BS3	2560	null	4.34e-07	8.82e-06	0.000439	0.171655	sDYSF(258)-sDYSF(1759)/	Intra-Protein	1	1	20.5	9.5	1.75e-13	6.88e-07	5.05453	sDYSF	1	sDYSF	2	258	1759	258	1758	KLLSDKPQDFQIR	VKAPVYR
29	5	4840	DLAAMDKDSFSDPYAIVSFLHQSQK(7)-GKTQEETEDPSVIGEFK(2)	Cross-Linked	BS3	4840	null	3.43e-12	9.02e-06	0.004434	0.9153	sDYSF(1216)-sDYSF(1578)/	Intra-Protein	1	1	39.5	23.5	5.37e-18	7.6e-12	5.04479	sDYSF	7	sDYSF	2	1216	1578	1210	1577	DLAAMDKDSFSDPYAIVSFLHQSQK	GKTQEETEDPSVIGEFK
30	5	3520	KWLLLSDPDDFSAGAR(1)-KLLSDKPQDFQIR(1)	Cross-Linked	BS3	3520	null	5.1e-11	9.4e-06	0.004072	1.15818	sDYSF(366)-sDYSF(258)/	Intra-Protein	1	1	29.5	18.5	6.96e-14	2.35e-10	5.02687	sDYSF	1	sDYSF	1	366	258	366	258	KWLLLSDPDDFSAGAR	KLLSDKPQDFQIR
31	4	3920	GKTQEETEDPSVIGEFK(2)-GKTQEETEDPSVIGEFK(2)	Cross-Linked	BS3	3920	null	0.00222	1.12e-05	-0.00195	-0.496831	sDYSF(1578)-sDYSF(1578)/	Inter-Protein	1	1	12	12	0.00375	0.00697	4.95078	sDYSF	2	sDYSF	2	1578	1578	1577	1577	GKTQEETEDPSVIGEFK	GKTQEETEDPSVIGEFK
32	3	2150	EKCGSYLEK(2)-TESKIPAR(4)	Cross-Linked	BS3	2150	Carbamidomethyl[C](3)	1.87e-14	1.23e-05	0.001043	0.484644	sDYSF(1537)-sDYSF(1948)/	Intra-Protein	1	1	17	19	8.18e-18	6.98e-12	4.91009	sDYSF	2	sDYSF	4	1537	1948	1536	1945	EKCGSYLEK	TESKIPAR
33	4	3540	FIFPFDYLPAEQVCTIAKK(18)-EKCGSYLEK(2)	Cross-Linked	BS3	3540	Carbamidomethyl[C](14);Carbamidomethyl[C](25)	3.91e-09	1.57e-05	-0.000671	-0.189668	sDYSF(1935)-sDYSF(1537)/	Intra-Protein	1	1	38.5	9.5	5.12e-17	3.92e-09	4.8041	sDYSF	18	sDYSF	2	1935	1537	1918	1536	FIFPFDYLPAEQVCTIAKK	EKCGSYLEK
34	5	3440	ITLYDYDLLSKDEK(11)-KLLSDKPQDFQIR(1)	Cross-Linked	BS3	3440	null	9.87e-15	1.61e-05	0.000895	0.260112	sDYSF(1702)-sDYSF(258)/	Intra-Protein	1	1	24	21	2.43e-11	1.09e-15	4.79317	sDYSF	11	sDYSF	1	1702	258	1692	258	ITLYDYDLLSKDEK	KLLSDKPQDFQIR
35	3	2750	KWLLLSDPDDFSAGAR(1)-KDPSEDK(1)	Cross-Linked	BS3	2750	null	2.47e-08	1.73e-05	0.004198	1.52857	sDYSF(366)-sDYSF(402)/	Intra-Protein	1	1	30	10	3.9e-16	5.81e-08	4.76195	sDYSF	1	sDYSF	1	366	402	366	402	KWLLLSDPDDFSAGAR	KDPSEDK
36	4	2220	LDKTESKIPAR(3)-KDAFWR(1)	Cross-Linked	BS3	2220	null	9.82e-09	1.78e-05	0.001318	0.594443	sDYSF(1944)-sDYSF(1936)/	Intra-Protein	1	1	21.5	12.5	6.39e-09	5.08e-10	4.74958	sDYSF	3	sDYSF	1	1944	1936	1942	1936	LDKTESKIPAR	KDAFWR
37	4	2220	LDKTESKIPAR(3)-KDAFWR(1)	Cross-Linked	BS3	2220	null	1.2e-07	1.82e-05	0.00125	0.563773	sDYSF(1944)-sDYSF(1936)/	Intra-Protein	1	1	15.5	12.5	1.38e-07	8.52e-11	4.73993	sDYSF	3	sDYSF	1	1944	1936	1942	1936	LDKTESKIPAR	KDAFWR
38	4	2220	LDKTESKIPAR(3)-KDAFWR(1)	Cross-Linked	BS3	2220	null	4.18e-11	1.89e-05	0.001428	0.644055	sDYSF(1944)-sDYSF(1936)/	Intra-Protein	1	1	26.5	11.5	3.28e-13	2.16e-11	4.72354	sDYSF	3	sDYSF	1	1944	1936	1942	1936	LDKTESKIPAR	KDAFWR
39	4	1590	KDAFWR(1)-KILAGK(1)	Cross-Linked	BS3	1590	null	4.24e-06	2.01e-05	-1.8e-05	-0.011328	sDYSF(1936)-sDYSF(2026)/	Intra-Protein	1	1	10	9	1.62e-10	1.22e-05	4.6968	sDYSF	1	sDYSF	1	1936	2026	1936	2026	KDAFWR	KILAGK
40	4	3620	GKTQEETEDPSVIGEFK(2)-KLLSDKPQDFQIR(1)	Cross-Linked	BS3	3620	null	3.36e-16	2.24e-05	0.001843	0.509277	sDYSF(1578)-sDYSF(258)/	Intra-Protein	1	1	35	18	4.13e-17	7.22e-16	4.64975	sDYSF	2	sDYSF	1	1578	258	1577	258	GKTQEETEDPSVIGEFK	KLLSDKPQDFQIR
41	5	5790	NMKSYQLANISSPSLVVECGGQTVQSCVIR(3)-LYRGKTQEETEDPSVIGEFK(5)	Cross-Linked	BS3	5790	Carbamidomethyl[C](19);Carbamidomethyl[C](27)	1.58e-09	2.27e-05	-0.000527	-0.091037	sDYSF(1392)-sDYSF(1578)/	Intra-Protein	1	1	48	23	8.77e-21	1.55e-10	4.64397	sDYSF	3	sDYSF	5	1392	1578	1390	1574	NMKSYQLANISSPSLVVECGGQTVQSCVIR	LYRGKTQEETEDPSVIGEFK
42	5	4950	DFDTLKVYDTQLENVEAFEGLSDFCNTFKLYR(29)-VTAAGQTKR(8)	Cross-Linked	BS3	4950	Carbamidomethyl[C](25)	2.45e-05	2.34e-05	0.008778	1.77462	sDYSF(1573)-sDYSF(297)/	Intra-Protein	1	1	56.5	9.5	1.84e-19	1.71e-05	4.63078	sDYSF	29	sDYSF	8	1573	297	1545	290	DFDTLKVYDTQLENVEAFEGLSDFCNTFKLYR	VTAAGQTKR
43	4	2220	LDKTESKIPAR(7)-KDAFWR(1)	Cross-Linked	BS3	2220	null	2.72e-08	2.37e-05	0.001019	0.459588	sDYSF(1948)-sDYSF(1936)/	Intra-Protein	1	1	22.5	11.5	2.7e-08	8.32e-09	4.62525	sDYSF	7	sDYSF	1	1948	1936	1942	1936	LDKTESKIPAR	KDAFWR
44	4	3680	FIFPFDYLPAEQVCTIAKK(18)-LDKTESKIPAR(3)	Cross-Linked	BS3	3680	Carbamidomethyl[C](14)	1.71e-13	2.43e-05	0.003103	0.842758	sDYSF(1935)-sDYSF(1944)/	Intra-Protein	1	1	42	15	1.23e-15	3.61e-15	4.61439	sDYSF	18	sDYSF	3	1935	1944	1918	1942	FIFPFDYLPAEQVCTIAKK	LDKTESKIPAR
45	5	4010	FIFPFDYLPAEQVCTIAKK(18)-KLLSDKPQDFQIR(1)	Cross-Linked	BS3	4010	Carbamidomethyl[C](14)	2.37e-14	2.53e-05	0.003734	0.930678	sDYSF(1935)-sDYSF(258)/	Intra-Protein	1	1	34	16	2.89e-15	4.95e-14	4.59688	sDYSF	18	sDYSF	1	1935	258	1918	258	FIFPFDYLPAEQVCTIAKK	KLLSDKPQDFQIR
46	4	3670	DDIECPLGWKWEDEEWSTDLNR(10)-KTDAFR(1)	Cross-Linked	BS3	3670	Carbamidomethyl[C](5)	9.18e-08	2.56e-05	0.004253	1.15959	sDYSF(1040)-sDYSF(1132)/	Intra-Protein	1	1	53.5	8.5	2.3e-25	4.05e-07	4.59176	sDYSF	10	sDYSF	1	1040	1132	1031	1132	DDIECPLGWKWEDEEWSTDLNR	KTDAFR
47	3	2690	DEKIGETVVDLENR(3)-VTAAGQTKR(8)	Cross-Linked	BS3	2690	null	2.64e-10	2.61e-05	0.000986	0.36717	sDYSF(1705)-sDYSF(297)/	Intra-Protein	1	1	23.5	20.5	3.27e-19	6.97e-10	4.58336	sDYSF	3	sDYSF	8	1705	297	1703	290	DEKIGETVVDLENR	VTAAGQTKR
48	5	3930	QAEAEGEGWEYASLFGWKFHLEYR(18)-KTDAFRR(1)	Cross-Linked	BS3	3930	null	9.74e-11	2.61e-05	0.004587	1.16602	sDYSF(1125)-sDYSF(1132)/	Intra-Protein	1	1	40.5	10.5	5.25e-24	3.86e-12	4.58336	sDYSF	18	sDYSF	1	1125	1132	1108	1132	QAEAEGEGWEYASLFGWKFHLEYR	KTDAFRR
49	3	1780	LDKTESK(3)-KDAFWR(1)	Cross-Linked	BS3	1780	null	4.97e-10	2.73e-05	0.000421	0.236526	sDYSF(1944)-sDYSF(1936)/	Intra-Protein	1	1	12	9	6.45e-10	5.66e-08	4.56384	sDYSF	3	sDYSF	1	1944	1936	1942	1936	LDKTESK	KDAFWR
50	3	2510	LDKTESKIPAR(3)-EKCGSYLEK(2)	Cross-Linked	BS3	2510	Carbamidomethyl[C](17)	3.43e-09	2.76e-05	0.000512	0.204122	sDYSF(1944)-sDYSF(1537)/	Intra-Protein	1	1	21.5	18.5	1.51e-20	3.63e-08	4.55909	sDYSF	3	sDYSF	2	1944	1537	1942	1536	LDKTESKIPAR	EKCGSYLEK
51	5	2700	DPNGKCDPYIK(5)-LDKTESKIPAR(3)	Cross-Linked	BS3	2700	Carbamidomethyl[C](6)	1.59e-09	2.8e-05	-0.000387	-0.14326	sDYSF(1645)-sDYSF(1944)/	Intra-Protein	1	1	13	16	4.74e-11	6.89e-10	4.55284	sDYSF	5	sDYSF	3	1645	1944	1641	1942	DPNGKCDPYIK	LDKTESKIPAR
52	5	3680	FIFPFDYLPAEQVCTIAKK(18)-LDKTESKIPAR(3)	Cross-Linked	BS3	3680	Carbamidomethyl[C](14)	1.61e-16	2.98e-05	0.00578	1.56982	sDYSF(1935)-sDYSF(1944)/	Intra-Protein	1	1	37	14	1.01e-14	2.05e-18	4.52578	sDYSF	18	sDYSF	3	1935	1944	1918	1942	FIFPFDYLPAEQVCTIAKK	LDKTESKIPAR
53	4	4100	GYLKTSLCVLGPGDEAPLER(4)-KWLLLSDPDDFSAGAR(1)	Cross-Linked	BS3	4100	Carbamidomethyl[C](8)	5.45e-12	2.98e-05	0.000751	0.183033	sDYSF(385)-sDYSF(366)/	Intra-Protein	1	1	33.5	27.5	1.18e-15	1.94e-12	4.52578	sDYSF	4	sDYSF	1	385	366	382	366	GYLKTSLCVLGPGDEAPLER	KWLLLSDPDDFSAGAR
54	3	2220	LDKTESKIPAR(3)-KDAFWR(1)	Cross-Linked	BS3	2220	null	6.85e-20	3.05e-05	0.001878	0.847013	sDYSF(1944)-sDYSF(1936)/	Intra-Protein	1	1	21	10	7.33e-12	1.45e-20	4.5157	sDYSF	3	sDYSF	1	1944	1936	1942	1936	LDKTESKIPAR	KDAFWR
55	3	2070	EKCGSYLEK(2)-LDKTESK(3)	Cross-Linked	BS3	2070	Carbamidomethyl[C](3)	3.41e-08	3.16e-05	-0.00105	-0.506995	sDYSF(1537)-sDYSF(1944)/	Intra-Protein	1	1	14.5	12.5	4.32e-16	9.23e-07	4.50031	sDYSF	2	sDYSF	3	1537	1944	1536	1942	EKCGSYLEK	LDKTESK
56	5	3680	FIFPFDYLPAEQVCTIAKK(18)-LDKTESKIPAR(3)	Cross-Linked	BS3	3680	Carbamidomethyl[C](14)	6.63e-10	3.4e-05	0.005927	1.60974	sDYSF(1935)-sDYSF(1944)/	Intra-Protein	1	1	26	13	2.75e-14	6.65e-10	4.46852	sDYSF	18	sDYSF	3	1935	1944	1918	1942	FIFPFDYLPAEQVCTIAKK	LDKTESKIPAR
57	4	3680	FIFPFDYLPAEQVCTIAKK(18)-LDKTESKIPAR(3)	Cross-Linked	BS3	3680	Carbamidomethyl[C](14)	3.06e-13	3.53e-05	0.003392	0.921248	sDYSF(1935)-sDYSF(1944)/	Intra-Protein	1	1	47	14	2.85e-17	5.01e-13	4.45223	sDYSF	18	sDYSF	3	1935	1944	1918	1942	FIFPFDYLPAEQVCTIAKK	LDKTESKIPAR
58	5	4540	DLAAMDKDSFSDPYAIVSFLHQSQK(7)-KLLSDKPQDFQIR(1)	Cross-Linked	BS3	4540	null	3.32e-08	4.2e-05	0.011265	2.48221	sDYSF(1216)-sDYSF(258)/	Intra-Protein	1	1	34	19	1.1e-12	1.05e-08	4.37675	sDYSF	7	sDYSF	1	1216	258	1210	258	DLAAMDKDSFSDPYAIVSFLHQSQK	KLLSDKPQDFQIR
59	5	3680	FIFPFDYLPAEQVCTIAKK(18)-LDKTESKIPAR(3)	Cross-Linked	BS3	3680	Carbamidomethyl[C](14)	1.71e-14	4.29e-05	0.006099	1.65646	sDYSF(1935)-sDYSF(1944)/	Intra-Protein	1	1	38	17	1.79e-18	4.21e-16	4.36754	sDYSF	18	sDYSF	3	1935	1944	1918	1942	FIFPFDYLPAEQVCTIAKK	LDKTESKIPAR
60	4	3670	DDIECPLGWKWEDEEWSTDLNR(10)-KTDAFR(1)	Cross-Linked	BS3	3670	Carbamidomethyl[C](5)	8.33e-07	4.51e-05	0.004253	1.15959	sDYSF(1040)-sDYSF(1132)/	Intra-Protein	1	1	45.5	7.5	2.64e-21	1.7e-06	4.34582	sDYSF	10	sDYSF	1	1040	1132	1031	1132	DDIECPLGWKWEDEEWSTDLNR	KTDAFR
61	3	4700	DFDTLKVYDTQLENVEAFEGLSDFCNTFK(6)-EKCGSYLEK(2)	Cross-Linked	BS3	4700	Carbamidomethyl[C](25);Carbamidomethyl[C](35)	2.84e-07	5e-05	0.003568	0.759769	sDYSF(1550)-sDYSF(1537)/	Intra-Protein	1	1	39.5	9.5	4.08e-15	2.22e-06	4.30103	sDYSF	6	sDYSF	2	1550	1537	1545	1536	DFDTLKVYDTQLENVEAFEGLSDFCNTFK	EKCGSYLEK
62	3	4100	GYLKTSLCVLGPGDEAPLER(4)-KWLLLSDPDDFSAGAR(1)	Cross-Linked	BS3	4100	Carbamidomethyl[C](8)	2.21e-12	5.14e-05	-0.003452	-0.841319	sDYSF(385)-sDYSF(366)/	Intra-Protein	1	1	31.5	19.5	9.89e-11	3.68e-17	4.28904	sDYSF	4	sDYSF	1	385	366	382	366	GYLKTSLCVLGPGDEAPLER	KWLLLSDPDDFSAGAR
63	4	2220	LDKTESKIPAR(3)-KDAFWR(1)	Cross-Linked	BS3	2220	null	5.79e-06	5.23e-05	0.001377	0.621053	sDYSF(1944)-sDYSF(1936)/	Intra-Protein	1	1	21.5	11.5	8.45e-08	3e-05	4.2815	sDYSF	3	sDYSF	1	1944	1936	1942	1936	LDKTESKIPAR	KDAFWR
64	5	4070	HRQAEAEGEGWEYASLFGWKFHLEYR(20)-KTDAFR(1)	Cross-Linked	BS3	4070	null	1.91e-09	5.61e-05	0.002545	0.62516	sDYSF(1125)-sDYSF(1132)/	Intra-Protein	1	1	57.5	4.5	1.05e-33	6.26e-08	4.25104	sDYSF	20	sDYSF	1	1125	1132	1106	1132	HRQAEAEGEGWEYASLFGWKFHLEYR	KTDAFR
65	4	5360	NMKSYQLANISSPSLVVECGGQTVQSCVIR(3)-GKTQEETEDPSVIGEFK(2)	Cross-Linked	BS3	5360	Carbamidomethyl[C](19);Carbamidomethyl[C](27)	5.51e-11	5.63e-05	-0.003848	-0.718366	sDYSF(1392)-sDYSF(1578)/	Intra-Protein	1	1	26	18	3.1e-18	6.93e-13	4.24949	sDYSF	3	sDYSF	2	1392	1578	1390	1577	NMKSYQLANISSPSLVVECGGQTVQSCVIR	GKTQEETEDPSVIGEFK
66	6	5000	ILAGKLEMTLEIVAESEHEERPAGQGR(5)-TVKGWWPCVAEEGEKK(15)	Cross-Linked	BS3	5000	Carbamidomethyl[C](38)	2.07e-11	5.86e-05	0.001188	0.237385	sDYSF(2031)-sDYSF(2025)/	Intra-Protein	1	1	24	25	8.8e-15	1.05e-10	4.2321	sDYSF	5	sDYSF	15	2031	2025	2027	2011	ILAGKLEMTLEIVAESEHEERPAGQGR	TVKGWWPCVAEEGEKK
67	6	2710	KLPSRPPPHYPGIKR(1)-VKAPVYR(2)	Cross-Linked	BS3	2710	null	1.45e-09	6.55e-05	-0.001189	-0.438328	sDYSF(235)-sDYSF(1759)/	Intra-Protein	1	1	18.5	7.5	4.52e-10	1.06e-08	4.18376	sDYSF	1	sDYSF	2	235	1759	235	1758	KLPSRPPPHYPGIKR	VKAPVYR
68	4	4700	DFDTLKVYDTQLENVEAFEGLSDFCNTFK(6)-EKCGSYLEK(2)	Cross-Linked	BS3	4700	Carbamidomethyl[C](25);Carbamidomethyl[C](35)	4.06e-06	6.98e-05	0.001856	0.395216	sDYSF(1550)-sDYSF(1537)/	Intra-Protein	1	1	49.5	11.5	3.66e-21	5.93e-06	4.15614	sDYSF	6	sDYSF	2	1550	1537	1545	1536	DFDTLKVYDTQLENVEAFEGLSDFCNTFK	EKCGSYLEK
69	4	5370	NMKSYQLANISSPSLVVECGGQTVQSCVIR(3)-GKTQEETEDPSVIGEFK(2)	Cross-Linked	BS3	5370	Carbamidomethyl[C](19);Carbamidomethyl[C](27);Oxidation[M](2)	2.96e-12	6.99e-05	-0.005253	-0.977739	sDYSF(1392)-sDYSF(1578)/	Intra-Protein	1	1	60	24	1.94e-25	1e-11	4.15552	sDYSF	3	sDYSF	2	1392	1578	1390	1577	NMKSYQLANISSPSLVVECGGQTVQSCVIR	GKTQEETEDPSVIGEFK
70	4	3680	FIFPFDYLPAEQVCTIAKK(18)-LDKTESKIPAR(7)	Cross-Linked	BS3	3680	Carbamidomethyl[C](14)	4.36e-13	7.08e-05	0.002109	0.572793	sDYSF(1935)-sDYSF(1948)/	Intra-Protein	1	1	42	11	5.69e-17	1.53e-14	4.14997	sDYSF	18	sDYSF	7	1935	1948	1918	1942	FIFPFDYLPAEQVCTIAKK	LDKTESKIPAR
71	5	2700	DPNGKCDPYIK(5)-LDKTESKIPAR(3)	Cross-Linked	BS3	2700	Carbamidomethyl[C](6)	2.21e-10	7.24e-05	-0.000361	-0.133635	sDYSF(1645)-sDYSF(1944)/	Intra-Protein	1	1	15	22	2.47e-13	5.11e-10	4.14026	sDYSF	5	sDYSF	3	1645	1944	1641	1942	DPNGKCDPYIK	LDKTESKIPAR
72	4	4560	VLPKDDIECPLGWKWEDEEWSTDLNR(14)-DLSQMEALKR(9)	Cross-Linked	BS3	4560	Carbamidomethyl[C](9)	3.87e-07	7.77e-05	-0.000263	-0.057698	sDYSF(1040)-sDYSF(1104)/	Intra-Protein	1	1	40.5	16.5	1.31e-17	1.41e-06	4.10958	sDYSF	14	sDYSF	9	1040	1104	1027	1096	VLPKDDIECPLGWKWEDEEWSTDLNR	DLSQMEALKR
73	4	4860	DLAAMDKDSFSDPYAIVSFLHQSQK(7)-GKTQEETEDPSVIGEFK(2)	Cross-Linked	BS3	4860	Oxidation[M](5)	1.4e-15	8.8e-05	0.003456	0.711066	sDYSF(1216)-sDYSF(1578)/	Intra-Protein	1	1	48.5	29.5	5.1e-20	1.68e-13	4.05552	sDYSF	7	sDYSF	2	1216	1578	1210	1577	DLAAMDKDSFSDPYAIVSFLHQSQK	GKTQEETEDPSVIGEFK
74	3	2070	EKCGSYLEK(2)-KDAFWR(1)	Cross-Linked	BS3	2070	Carbamidomethyl[C](3)	1.13e-07	8.86e-05	-0.002179	-1.05113	sDYSF(1537)-sDYSF(1936)/	Intra-Protein	1	1	13	9	8.97e-10	4.39e-07	4.05257	sDYSF	2	sDYSF	1	1537	1936	1536	1936	EKCGSYLEK	KDAFWR
75	4	4860	EFTGFPDPYTELNTGKGEGVAYR(16)-GYLKTSLCVLGPGDEAPLER(4)	Cross-Linked	BS3	4860	Carbamidomethyl[C](34)	2.18e-12	9.24e-05	-0.009265	-1.90623	sDYSF(593)-sDYSF(385)/	Intra-Protein	1	1	35.5	26.5	6.24e-13	1.32e-14	4.03433	sDYSF	16	sDYSF	4	593	385	578	382	EFTGFPDPYTELNTGKGEGVAYR	GYLKTSLCVLGPGDEAPLER
76	5	4010	FIFPFDYLPAEQVCTIAKK(18)-KLLSDKPQDFQIR(1)	Cross-Linked	BS3	4010	Carbamidomethyl[C](14)	1.44e-15	9.31e-05	0.003734	0.930678	sDYSF(1935)-sDYSF(258)/	Intra-Protein	1	1	35	18	8.82e-15	1e-15	4.03105	sDYSF	18	sDYSF	1	1935	258	1918	258	FIFPFDYLPAEQVCTIAKK	KLLSDKPQDFQIR
77	4	3670	DDIECPLGWKWEDEEWSTDLNR(10)-KTDAFR(1)	Cross-Linked	BS3	3670	Carbamidomethyl[C](5)	1.95e-05	9.84e-05	0.004253	1.15959	sDYSF(1040)-sDYSF(1132)/	Intra-Protein	1	1	35.5	6.5	1.8e-17	3.36e-05	4.007	sDYSF	10	sDYSF	1	1040	1132	1031	1132	DDIECPLGWKWEDEEWSTDLNR	KTDAFR
78	6	4230	HRQAEAEGEGWEYASLFGWKFHLEYR(20)-KTDAFRR(1)	Cross-Linked	BS3	4230	null	6.73e-07	0.000115	-0.003144	-0.74378	sDYSF(1125)-sDYSF(1132)/	Intra-Protein	1	1	51.5	10.5	2.75e-23	9.88e-07	3.9393	sDYSF	20	sDYSF	1	1125	1132	1106	1132	HRQAEAEGEGWEYASLFGWKFHLEYR	KTDAFRR
79	4	2070	EKCGSYLEK(2)-KDAFWR(1)	Cross-Linked	BS3	2070	Carbamidomethyl[C](3)	1.09e-07	0.000123	0.000232	0.111915	sDYSF(1537)-sDYSF(1936)/	Intra-Protein	1	1	13	13	2.49e-10	1.59e-07	3.91009	sDYSF	2	sDYSF	1	1537	1936	1536	1936	EKCGSYLEK	KDAFWR
80	5	5910	DFDTLKVYDTQLENVEAFEGLSDFCNTFKLYR(29)-GKTQEETEDPSVIGEFK(2)	Cross-Linked	BS3	5910	Carbamidomethyl[C](25)	1.12e-11	0.000128	0.028639	4.84684	sDYSF(1573)-sDYSF(1578)/	Intra-Protein	1	1	51	20	6.25e-15	4.13e-12	3.89279	sDYSF	29	sDYSF	2	1573	1578	1545	1577	DFDTLKVYDTQLENVEAFEGLSDFCNTFKLYR	GKTQEETEDPSVIGEFK
81	5	3690	ISAPGGEIEEEPAGAVKPSK(17)-KLLSDKPQDFQIR(1)	Cross-Linked	BS3	3690	null	2.59e-10	0.000129	0.00054	0.146303	sDYSF(548)-sDYSF(258)/	Intra-Protein	1	1	30	16	2.4e-10	9.62e-12	3.88941	sDYSF	17	sDYSF	1	548	258	532	258	ISAPGGEIEEEPAGAVKPSK	KLLSDKPQDFQIR
82	4	3930	QAEAEGEGWEYASLFGWKFHLEYR(18)-KTDAFRR(1)	Cross-Linked	BS3	3930	null	1.49e-12	0.000146	0.007756	1.97158	sDYSF(1125)-sDYSF(1132)/	Intra-Protein	1	1	51	12	2.16e-21	1.1e-12	3.83565	sDYSF	18	sDYSF	1	1125	1132	1108	1132	QAEAEGEGWEYASLFGWKFHLEYR	KTDAFRR
83	3	2270	DPNGKCDPYIK(5)-KDAFWR(1)	Cross-Linked	BS3	2270	Carbamidomethyl[C](6)	7.58e-06	0.000148	-0.003172	-1.39976	sDYSF(1645)-sDYSF(1936)/	Intra-Protein	1	1	17	10	7.07e-09	6.78e-06	3.82974	sDYSF	5	sDYSF	1	1645	1936	1641	1936	DPNGKCDPYIK	KDAFWR
84	5	4890	KDPSEDKEDIESNLLRPTGVALR(1)-GYLKTSLCVLGPGDEAPLER(4)	Cross-Linked	BS3	4890	Carbamidomethyl[C](34)	3.49e-07	0.000155	0.004012	0.819693	sDYSF(402)-sDYSF(385)/	Intra-Protein	1	1	24.5	30.5	2.76e-08	3.81e-14	3.80967	sDYSF	1	sDYSF	4	402	385	402	382	KDPSEDKEDIESNLLRPTGVALR	GYLKTSLCVLGPGDEAPLER
85	4	3440	ITLYDYDLLSKDEK(11)-KLLSDKPQDFQIR(1)	Cross-Linked	BS3	3440	null	1.55e-10	0.000159	0.007087	2.05968	sDYSF(1702)-sDYSF(258)/	Intra-Protein	1	1	29	21	4.33e-09	2.26e-11	3.7986	sDYSF	11	sDYSF	1	1702	258	1692	258	ITLYDYDLLSKDEK	KLLSDKPQDFQIR
86	5	2220	LDKTESKIPAR(3)-KDAFWR(1)	Cross-Linked	BS3	2220	null	3.04e-07	0.000181	-0.00071	-0.320223	sDYSF(1944)-sDYSF(1936)/	Intra-Protein	1	1	19.5	10.5	2.74e-06	6.33e-09	3.74232	sDYSF	3	sDYSF	1	1944	1936	1942	1936	LDKTESKIPAR	KDAFWR
87	5	6160	DFDTLKVYDTQLENVEAFEGLSDFCNTFK(6)-KDPSEDKEDIESNLLRPTGVALR(1)	Cross-Linked	BS3	6160	Carbamidomethyl[C](25)	1.52e-08	0.000182	-0.000678	-0.109976	sDYSF(1550)-sDYSF(402)/	Intra-Protein	1	1	41	14	5.88e-21	3.12e-08	3.73993	sDYSF	6	sDYSF	1	1550	402	1545	402	DFDTLKVYDTQLENVEAFEGLSDFCNTFK	KDPSEDKEDIESNLLRPTGVALR
88	5	2980	KLLSDKPQDFQIR(1)-LDKTESKIPAR(3)	Cross-Linked	BS3	2980	null	4.03e-06	0.00019	-0.005626	-1.88623	sDYSF(258)-sDYSF(1944)/	Intra-Protein	1	1	18.5	14.5	7.44e-09	5.35e-06	3.72125	sDYSF	1	sDYSF	3	258	1944	258	1942	KLLSDKPQDFQIR	LDKTESKIPAR
89	4	3620	GKTQEETEDPSVIGEFK(2)-KLLSDKPQDFQIR(6)	Cross-Linked	BS3	3620	null	6.23e-12	0.000199	-0.000993	-0.274396	sDYSF(1578)-sDYSF(263)/	Intra-Protein	1	1	31	14	6.92e-20	4.49e-11	3.70115	sDYSF	2	sDYSF	6	1578	263	1577	258	GKTQEETEDPSVIGEFK	KLLSDKPQDFQIR
90	5	4230	HRQAEAEGEGWEYASLFGWKFHLEYR(20)-KTDAFRR(1)	Cross-Linked	BS3	4230	null	9.94e-10	0.0002	0.000395	0.093446	sDYSF(1125)-sDYSF(1132)/	Intra-Protein	1	1	58.5	12.5	2.53e-26	1.13e-08	3.69897	sDYSF	20	sDYSF	1	1125	1132	1106	1132	HRQAEAEGEGWEYASLFGWKFHLEYR	KTDAFRR
91	4	3330	FIFPFDYLPAEQVCTIAKK(18)-TESKIPAR(4)	Cross-Linked	BS3	3330	Carbamidomethyl[C](14)	1.5e-10	0.000208	0.004225	1.27039	sDYSF(1935)-sDYSF(1948)/	Intra-Protein	1	1	42	12	6.17e-17	4.53e-11	3.68194	sDYSF	18	sDYSF	4	1935	1948	1918	1945	FIFPFDYLPAEQVCTIAKK	TESKIPAR
92	6	4310	KDPSEDKEDIESNLLRPTGVALR(7)-KLLSDKPQDFQIR(1)	Cross-Linked	BS3	4310	null	4.12e-09	0.000211	0.004777	1.10905	sDYSF(408)-sDYSF(258)/	Intra-Protein	1	1	26	16	1.36e-08	1.35e-10	3.67572	sDYSF	7	sDYSF	1	408	258	402	258	KDPSEDKEDIESNLLRPTGVALR	KLLSDKPQDFQIR
93	4	2960	GKTQEETEDPSVIGEFK(2)-VTAAGQTKR(8)	Cross-Linked	BS3	2960	null	1.17e-05	0.000226	0.000255	0.086076	sDYSF(1578)-sDYSF(297)/	Intra-Protein	1	1	22	13	3.2e-13	1.62e-05	3.64589	sDYSF	2	sDYSF	8	1578	297	1577	290	GKTQEETEDPSVIGEFK	VTAAGQTKR
94	6	4890	KDPSEDKEDIESNLLRPTGVALR(1)-GYLKTSLCVLGPGDEAPLER(4)	Cross-Linked	BS3	4890	Carbamidomethyl[C](34)	2.93e-07	0.00023	0.002849	0.58208	sDYSF(402)-sDYSF(385)/	Intra-Protein	1	1	16.5	23.5	1.48e-06	2.09e-18	3.63827	sDYSF	1	sDYSF	4	402	385	402	382	KDPSEDKEDIESNLLRPTGVALR	GYLKTSLCVLGPGDEAPLER
95	5	4470	EELYCPPITVKVIDNRQFGR(11)-GKTQEETEDPSVIGEFK(2)	Cross-Linked	BS3	4470	Carbamidomethyl[C](5)	1.46e-10	0.000239	0.00472	1.05706	sDYSF(1451)-sDYSF(1578)/	Intra-Protein	1	1	27	23	3.04e-09	7.51e-11	3.6216	sDYSF	11	sDYSF	2	1451	1578	1441	1577	EELYCPPITVKVIDNRQFGR	GKTQEETEDPSVIGEFK
96	4	1790	VKAPVYR(2)-KDAFWR(1)	Cross-Linked	BS3	1790	null	3.88e-05	0.000248	-0.001261	-0.703687	sDYSF(1759)-sDYSF(1936)/	Intra-Protein	1	1	7.5	5.5	9.91e-07	7.06e-05	3.60555	sDYSF	2	sDYSF	1	1759	1936	1758	1936	VKAPVYR	KDAFWR
97	5	5280	DLAAMDKDSFSDPYAIVSFLHQSQK(7)-LYRGKTQEETEDPSVIGEFK(5)	Cross-Linked	BS3	5280	null	1.92e-09	0.000249	0.000156	0.029565	sDYSF(1216)-sDYSF(1578)/	Intra-Protein	1	1	34.5	22.5	3.88e-16	1.72e-09	3.6038	sDYSF	7	sDYSF	5	1216	1578	1210	1574	DLAAMDKDSFSDPYAIVSFLHQSQK	LYRGKTQEETEDPSVIGEFK
98	3	2220	LDKTESKIPAR(7)-KDAFWR(1)	Cross-Linked	BS3	2220	null	2.35e-10	0.000252	0.00024	0.108245	sDYSF(1948)-sDYSF(1936)/	Intra-Protein	1	1	21	11	1.93e-12	3.2e-10	3.5986	sDYSF	7	sDYSF	1	1948	1936	1942	1936	LDKTESKIPAR	KDAFWR
99	6	4310	KDPSEDKEDIESNLLRPTGVALR(1)-KLLSDKPQDFQIR(1)	Cross-Linked	BS3	4310	null	1.16e-09	0.000271	0.001295	0.300653	sDYSF(402)-sDYSF(258)/	Intra-Protein	1	1	21	13	6.53e-10	4.16e-09	3.56703	sDYSF	1	sDYSF	1	402	258	402	258	KDPSEDKEDIESNLLRPTGVALR	KLLSDKPQDFQIR
100	5	4860	DLAAMDKDSFSDPYAIVSFLHQSQK(7)-GKTQEETEDPSVIGEFK(2)	Cross-Linked	BS3	4860	Oxidation[M](5)	9.92e-13	0.000295	0.011067	2.27702	sDYSF(1216)-sDYSF(1578)/	Intra-Protein	1	1	38.5	26.5	1.6e-14	6.65e-12	3.53018	sDYSF	7	sDYSF	2	1216	1578	1210	1577	DLAAMDKDSFSDPYAIVSFLHQSQK	GKTQEETEDPSVIGEFK
101	4	3830	EFTGFPDPYTELNTGKGEGVAYR(16)-YPMEKVPGAR(5)	Cross-Linked	BS3	3830	null	4.2e-07	0.000299	-0.000497	-0.129668	sDYSF(593)-sDYSF(889)/	Intra-Protein	1	1	39.5	11.5	7.33e-14	1.98e-07	3.52433	sDYSF	16	sDYSF	5	593	889	578	885	EFTGFPDPYTELNTGKGEGVAYR	YPMEKVPGAR
102	3	2070	EKCGSYLEK(2)-KDPSEDK(1)	Cross-Linked	BS3	2070	Carbamidomethyl[C](3)	2.56e-08	0.000301	-0.000897	-0.433548	sDYSF(1537)-sDYSF(402)/	Intra-Protein	1	1	9.5	8.5	1.27e-08	1.77e-09	3.52143	sDYSF	2	sDYSF	1	1537	402	1536	402	EKCGSYLEK	KDPSEDK
103	4	2260	DPNGKCDPYIK(5)-LDKTESK(3)	Cross-Linked	BS3	2260	Carbamidomethyl[C](6)	8.16e-09	0.000305	0.000242	0.106885	sDYSF(1645)-sDYSF(1944)/	Intra-Protein	1	1	23.5	9.5	1.45e-12	2.75e-07	3.5157	sDYSF	5	sDYSF	3	1645	1944	1641	1942	DPNGKCDPYIK	LDKTESK
104	5	2220	KDAFWRLDK(1)-TESKIPAR(4)	Cross-Linked	BS3	2220	null	1.37e-09	0.000306	6.4e-05	0.028865	sDYSF(1936)-sDYSF(1948)/	Intra-Protein	1	1	16	11	6.18e-13	1.15e-08	3.51428	sDYSF	1	sDYSF	4	1936	1948	1936	1945	KDAFWRLDK	TESKIPAR
105	5	3620	GKTQEETEDPSVIGEFK(2)-KLLSDKPQDFQIR(1)	Cross-Linked	BS3	3620	null	1.15e-10	0.000311	0.001607	0.444063	sDYSF(1578)-sDYSF(258)/	Intra-Protein	1	1	30	16	3.9e-14	2.14e-11	3.50724	sDYSF	2	sDYSF	1	1578	258	1577	258	GKTQEETEDPSVIGEFK	KLLSDKPQDFQIR
106	4	5190	VYDTQLENVEAFEGLSDFCNTFKLYR(23)-GKTQEETEDPSVIGEFK(2)	Cross-Linked	BS3	5190	Carbamidomethyl[C](19)	1.6e-11	0.000325	-0.015567	-2.99974	sDYSF(1573)-sDYSF(1578)/	Intra-Protein	1	1	47.5	20.5	1.12e-14	2.53e-12	3.48812	sDYSF	23	sDYSF	2	1573	1578	1551	1577	VYDTQLENVEAFEGLSDFCNTFKLYR	GKTQEETEDPSVIGEFK
107	5	3250	MSDIYVKGWMIGFEEHK(7)-QKTDVHYR(2)	Cross-Linked	BS3	3250	null	0.000543	0.000379	-0.002298	-0.706299	sDYSF(1888)-sDYSF(1900)/	Intra-Protein	1	1	26	10	1.08e-12	0.000649	3.42136	sDYSF	7	sDYSF	2	1888	1900	1882	1899	MSDIYVKGWMIGFEEHK	QKTDVHYR
108	6	4070	HRQAEAEGEGWEYASLFGWKFHLEYR(20)-KTDAFR(1)	Cross-Linked	BS3	4070	null	1.79e-08	0.000419	0.002195	0.539185	sDYSF(1125)-sDYSF(1132)/	Intra-Protein	1	1	50.5	7.5	6.18e-25	6.07e-08	3.37779	sDYSF	20	sDYSF	1	1125	1132	1106	1132	HRQAEAEGEGWEYASLFGWKFHLEYR	KTDAFR
109	6	2710	KLPSRPPPHYPGIKR(1)-VKAPVYR(2)	Cross-Linked	BS3	2710	null	2.54e-14	0.000424	-0.001239	-0.45676	sDYSF(235)-sDYSF(1759)/	Intra-Protein	1	1	20.5	7.5	2.88e-10	1.21e-09	3.37263	sDYSF	1	sDYSF	2	235	1759	235	1758	KLPSRPPPHYPGIKR	VKAPVYR
110	5	3470	KLPSRPPPHYPGIKR(1)-KLLSDKPQDFQIR(1)	Cross-Linked	BS3	3470	null	1.16e-14	0.000445	-0.001166	-0.33622	sDYSF(235)-sDYSF(258)/	Intra-Protein	1	1	23.5	20.5	1.6e-13	2.18e-16	3.35164	sDYSF	1	sDYSF	1	235	258	235	258	KLPSRPPPHYPGIKR	KLLSDKPQDFQIR
111	4	4390	NMKSYQLANISSPSLVVECGGQTVQSCVIR(3)-VTAAGQTKR(8)	Cross-Linked	BS3	4390	Carbamidomethyl[C](19);Carbamidomethyl[C](27)	9.02e-06	0.000453	0.001748	0.397795	sDYSF(1392)-sDYSF(297)/	Intra-Protein	1	1	61.5	11.5	2.81e-25	9.26e-06	3.3439	sDYSF	3	sDYSF	8	1392	297	1390	290	NMKSYQLANISSPSLVVECGGQTVQSCVIR	VTAAGQTKR
112	4	2220	KDAFWRLDK(1)-TESKIPAR(4)	Cross-Linked	BS3	2220	null	6.39e-11	0.000472	0.000987	0.445156	sDYSF(1936)-sDYSF(1948)/	Intra-Protein	1	1	18	13	4.29e-15	1.58e-08	3.32606	sDYSF	1	sDYSF	4	1936	1948	1936	1945	KDAFWRLDK	TESKIPAR
113	5	4410	LYRGKTQEETEDPSVIGEFK(5)-EELYCPPITVKVIDNR(11)	Cross-Linked	BS3	4410	Carbamidomethyl[C](28)	3.45e-09	0.000517	0.001479	0.335433	sDYSF(1578)-sDYSF(1451)/	Intra-Protein	1	1	24	28	4.69e-10	3.39e-10	3.28651	sDYSF	5	sDYSF	11	1578	1451	1574	1441	LYRGKTQEETEDPSVIGEFK	EELYCPPITVKVIDNR
114	4	2270	DPNGKCDPYIK(5)-KDAFWR(1)	Cross-Linked	BS3	2270	Carbamidomethyl[C](6)	1.24e-09	0.000519	0.000208	0.091788	sDYSF(1645)-sDYSF(1936)/	Intra-Protein	1	1	17	9	7.58e-10	6.52e-09	3.28483	sDYSF	5	sDYSF	1	1645	1936	1641	1936	DPNGKCDPYIK	KDAFWR
115	6	3770	GKTQEETEDPSVIGEFK(2)-KLPSRPPPHYPGIKR(1)	Cross-Linked	BS3	3770	null	1.07e-05	0.000544	0.006737	1.78512	sDYSF(1578)-sDYSF(235)/	Intra-Protein	1	1	24	15	8.47e-12	1.61e-05	3.2644	sDYSF	2	sDYSF	1	1578	235	1577	235	GKTQEETEDPSVIGEFK	KLPSRPPPHYPGIKR
116	6	2630	KLLSDKPQDFQIR(1)-KRSAPTSR(1)	Cross-Linked	BS3	2630	null	7.47e-08	0.000545	0.000436	0.16594	sDYSF(258)-sDYSF(250)/	Intra-Protein	1	1	18.5	8.5	4.14e-15	2.21e-07	3.2636	sDYSF	1	sDYSF	1	258	250	258	250	KLLSDKPQDFQIR	KRSAPTSR
117	7	2710	KLPSRPPPHYPGIKR(1)-VKAPVYR(2)	Cross-Linked	BS3	2710	null	7.4e-07	0.000581	-0.000354	-0.130503	sDYSF(235)-sDYSF(1759)/	Intra-Protein	1	1	19.5	6.5	1.05e-07	1.13e-06	3.23582	sDYSF	1	sDYSF	2	235	1759	235	1758	KLPSRPPPHYPGIKR	VKAPVYR
118	3	3130	GYLKTSLCVLGPGDEAPLER(4)-KDPSEDK(1)	Cross-Linked	BS3	3130	Carbamidomethyl[C](8)	8.86e-10	0.000598	-0.000331	-0.105732	sDYSF(385)-sDYSF(402)/	Intra-Protein	1	1	40.5	9.5	5.38e-21	2.77e-09	3.2233	sDYSF	4	sDYSF	1	385	402	382	402	GYLKTSLCVLGPGDEAPLER	KDPSEDK
119	5	3440	ITLYDYDLLSKDEK(11)-KLLSDKPQDFQIR(6)	Cross-Linked	BS3	3440	null	2.66e-08	0.000599	0.001497	0.435071	sDYSF(1702)-sDYSF(263)/	Intra-Protein	1	1	30	17	9.59e-10	3.2e-08	3.22257	sDYSF	11	sDYSF	6	1702	263	1692	258	ITLYDYDLLSKDEK	KLLSDKPQDFQIR
120	6	2560	KLPSRPPPHYPGIK(1)-VKAPVYR(2)	Cross-Linked	BS3	2560	null	1.79e-12	0.000639	0.004464	1.74615	sDYSF(235)-sDYSF(1759)/	Intra-Protein	1	1	19	8	1.31e-09	3.35e-09	3.1945	sDYSF	1	sDYSF	2	235	1759	235	1758	KLPSRPPPHYPGIK	VKAPVYR
121	6	5330	DFDTLKVYDTQLENVEAFEGLSDFCNTFK(6)-KLPSRPPPHYPGIKR(1)	Cross-Linked	BS3	5330	Carbamidomethyl[C](25)	7.49e-06	0.000646	-0.015604	-2.92997	sDYSF(1550)-sDYSF(235)/	Intra-Protein	1	1	35	16	1.05e-13	3.11e-06	3.18977	sDYSF	6	sDYSF	1	1550	235	1545	235	DFDTLKVYDTQLENVEAFEGLSDFCNTFK	KLPSRPPPHYPGIKR
122	5	5190	VYDTQLENVEAFEGLSDFCNTFKLYR(23)-GKTQEETEDPSVIGEFK(2)	Cross-Linked	BS3	5190	Carbamidomethyl[C](19)	1.51e-08	0.000652	-0.029348	-5.65533	sDYSF(1573)-sDYSF(1578)/	Intra-Protein	1	1	37.5	19.5	2.77e-13	3.32e-09	3.18575	sDYSF	23	sDYSF	2	1573	1578	1551	1577	VYDTQLENVEAFEGLSDFCNTFKLYR	GKTQEETEDPSVIGEFK
123	4	4270	EFTGFPDPYTELNTGKGEGVAYR(16)-KLLSDKPQDFQIR(1)	Cross-Linked	BS3	4270	null	9.09e-10	0.000665	0.003912	0.915485	sDYSF(593)-sDYSF(258)/	Intra-Protein	1	1	41.5	14.5	6.36e-16	7.68e-11	3.17718	sDYSF	16	sDYSF	1	593	258	578	258	EFTGFPDPYTELNTGKGEGVAYR	KLLSDKPQDFQIR
124	4	2690	DEKIGETVVDLENR(3)-VTAAGQTKR(8)	Cross-Linked	BS3	2690	null	1.24e-07	0.00075	0.002142	0.797645	sDYSF(1705)-sDYSF(297)/	Intra-Protein	1	1	19.5	10.5	1.44e-12	1.28e-06	3.12494	sDYSF	3	sDYSF	8	1705	297	1703	290	DEKIGETVVDLENR	VTAAGQTKR
125	4	3240	FIFPFDYLPAEQVCTIAKK(18)-LDKTESK(3)	Cross-Linked	BS3	3240	Carbamidomethyl[C](14)	2.64e-06	0.000758	0.002486	0.766176	sDYSF(1935)-sDYSF(1944)/	Intra-Protein	1	1	37.5	5.5	1.49e-14	2.63e-07	3.12033	sDYSF	18	sDYSF	3	1935	1944	1918	1942	FIFPFDYLPAEQVCTIAKK	LDKTESK
126	4	3730	FIFPFDYLPAEQVCTIAKK(18)-DPNGKCDPYIK(5)	Cross-Linked	BS3	3730	Carbamidomethyl[C](14);Carbamidomethyl[C](28)	9.25e-07	0.000769	0.001343	0.359971	sDYSF(1935)-sDYSF(1645)/	Intra-Protein	1	1	27.5	10.5	3.78e-11	6.73e-07	3.11407	sDYSF	18	sDYSF	5	1935	1645	1918	1641	FIFPFDYLPAEQVCTIAKK	DPNGKCDPYIK
127	4	3240	FIFPFDYLPAEQVCTIAKK(18)-LDKTESK(3)	Cross-Linked	BS3	3240	Carbamidomethyl[C](14)	9.32e-14	0.000783	0.003538	1.0904	sDYSF(1935)-sDYSF(1944)/	Intra-Protein	1	1	40.5	5.5	4.16e-19	1.9e-10	3.10624	sDYSF	18	sDYSF	3	1935	1944	1918	1942	FIFPFDYLPAEQVCTIAKK	LDKTESK
128	3	2070	EKCGSYLEK(2)-KDAFWR(1)	Cross-Linked	BS3	2070	Carbamidomethyl[C](3)	2.49e-06	0.000783	-0.002179	-1.05113	sDYSF(1537)-sDYSF(1936)/	Intra-Protein	1	1	17	9	3.13e-09	3.34e-06	3.10624	sDYSF	2	sDYSF	1	1537	1936	1536	1936	EKCGSYLEK	KDAFWR
129	7	4230	HRQAEAEGEGWEYASLFGWKFHLEYR(20)-KTDAFRR(1)	Cross-Linked	BS3	4230	null	7.03e-07	0.000806	0.003921	0.927595	sDYSF(1125)-sDYSF(1132)/	Intra-Protein	1	1	42.5	10.5	4.75e-23	1.17e-06	3.09366	sDYSF	20	sDYSF	1	1125	1132	1106	1132	HRQAEAEGEGWEYASLFGWKFHLEYR	KTDAFRR
130	5	3470	KLPSRPPPHYPGIKR(1)-KLLSDKPQDFQIR(1)	Cross-Linked	BS3	3470	null	6.79e-11	0.000808	-0.001166	-0.33622	sDYSF(235)-sDYSF(258)/	Intra-Protein	1	1	21.5	21.5	5.43e-11	2.52e-14	3.09259	sDYSF	1	sDYSF	1	235	258	235	258	KLPSRPPPHYPGIKR	KLLSDKPQDFQIR
131	5	5290	DLAAMDKDSFSDPYAIVSFLHQSQK(7)-GKTQEETEDPSVIGEFKGLFK(2)	Cross-Linked	BS3	5290	null	3.3e-09	0.000817	-0.004202	-0.794392	sDYSF(1216)-sDYSF(1578)/	Intra-Protein	1	1	33.5	21.5	4.54e-11	4.36e-09	3.08778	sDYSF	7	sDYSF	2	1216	1578	1210	1577	DLAAMDKDSFSDPYAIVSFLHQSQK	GKTQEETEDPSVIGEFKGLFK
132	5	3680	FIFPFDYLPAEQVCTIAKK(18)-LDKTESKIPAR(7)	Cross-Linked	BS3	3680	Carbamidomethyl[C](14)	3.56e-10	0.000821	0.004948	1.34385	sDYSF(1935)-sDYSF(1948)/	Intra-Protein	1	1	27	9	1.01e-11	3.46e-09	3.08566	sDYSF	18	sDYSF	7	1935	1948	1918	1942	FIFPFDYLPAEQVCTIAKK	LDKTESKIPAR
133	4	3240	FIFPFDYLPAEQVCTIAKK(18)-LDKTESK(3)	Cross-Linked	BS3	3240	Carbamidomethyl[C](14)	2.8e-06	0.000868	0.003494	1.07684	sDYSF(1935)-sDYSF(1944)/	Intra-Protein	1	1	34.5	5.5	7.99e-15	4.27e-06	3.06148	sDYSF	18	sDYSF	3	1935	1944	1918	1942	FIFPFDYLPAEQVCTIAKK	LDKTESK
134	3	3450	DLKITLYDYDLLSK(3)-DEKIGETVVDLENR(3)	Cross-Linked	BS3	3450	null	1.59e-07	0.000899	0.001169	0.338469	sDYSF(1691)-sDYSF(1705)/	Intra-Protein	1	1	15	14	1.98e-07	7.99e-07	3.04624	sDYSF	3	sDYSF	3	1691	1705	1689	1703	DLKITLYDYDLLSK	DEKIGETVVDLENR
135	5	4350	VMFQDKEYSIEEIEAGRIPNPHLGPVEER(6)-VKAPVYR(2)	Cross-Linked	BS3	4350	null	0.000307	0.000932	0.004298	0.987538	sDYSF(1773)-sDYSF(1759)/	Intra-Protein	1	1	44	9	1.12e-16	0.00064	3.03058	sDYSF	6	sDYSF	2	1773	1759	1768	1758	VMFQDKEYSIEEIEAGRIPNPHLGPVEER	VKAPVYR
136	5	5910	DFDTLKVYDTQLENVEAFEGLSDFCNTFKLYR(29)-GKTQEETEDPSVIGEFK(2)	Cross-Linked	BS3	5910	Carbamidomethyl[C](25)	8.35e-11	0.000935	0.028639	4.84684	sDYSF(1573)-sDYSF(1578)/	Intra-Protein	1	1	49	21	2.19e-15	8.45e-12	3.02919	sDYSF	29	sDYSF	2	1573	1578	1545	1577	DFDTLKVYDTQLENVEAFEGLSDFCNTFKLYR	GKTQEETEDPSVIGEFK
137	5	5130	DFDTLKVYDTQLENVEAFEGLSDFCNTFKLYR(6)-EKCGSYLEK(2)	Cross-Linked	BS3	5130	Carbamidomethyl[C](25);Carbamidomethyl[C](38)	5.15e-05	0.000941	0.001823	0.355471	sDYSF(1550)-sDYSF(1537)/	Intra-Protein	1	1	43	11	1.31e-14	1.7e-05	3.02641	sDYSF	6	sDYSF	2	1550	1537	1545	1536	DFDTLKVYDTQLENVEAFEGLSDFCNTFKLYR	EKCGSYLEK
138	6	2710	KLPSRPPPHYPGIKR(1)-VKAPVYR(2)	Cross-Linked	BS3	2710	null	2.05e-09	0.000946	-0.001197	-0.441277	sDYSF(235)-sDYSF(1759)/	Intra-Protein	1	1	16.5	7.5	2.4e-06	3.66e-08	3.02411	sDYSF	1	sDYSF	2	235	1759	235	1758	KLPSRPPPHYPGIKR	VKAPVYR
139	4	3130	GYLKTSLCVLGPGDEAPLER(4)-KDPSEDK(1)	Cross-Linked	BS3	3130	Carbamidomethyl[C](8)	7.04e-09	0.000974	0.000511	0.16323	sDYSF(385)-sDYSF(402)/	Intra-Protein	1	1	34	10	1.21e-17	1.41e-08	3.01144	sDYSF	4	sDYSF	1	385	402	382	402	GYLKTSLCVLGPGDEAPLER	KDPSEDK
140	5	6620	NMKSYQLANISSPSLVVECGGQTVQSCVIR(3)-VYDTQLENVEAFEGLSDFCNTFKLYR(23)	Cross-Linked	BS3	6620	Carbamidomethyl[C](19);Carbamidomethyl[C](27);Carbamidomethyl[C](52)	6.63e-08	0.00104	-0.000956	-0.144385	sDYSF(1392)-sDYSF(1573)/	Intra-Protein	1	1	33.5	23.5	5.51e-14	4.9e-08	2.98297	sDYSF	3	sDYSF	23	1392	1573	1390	1551	NMKSYQLANISSPSLVVECGGQTVQSCVIR	VYDTQLENVEAFEGLSDFCNTFKLYR
141	4	3980	GKTQEETEDPSVIGEFK(2)-EELYCPPITVKVIDNR(11)	Cross-Linked	BS3	3980	Carbamidomethyl[C](25)	1.13e-08	0.00104	-0.005005	-1.25849	sDYSF(1578)-sDYSF(1451)/	Intra-Protein	1	1	20	26	8.28e-09	1.07e-10	2.98297	sDYSF	2	sDYSF	11	1578	1451	1577	1441	GKTQEETEDPSVIGEFK	EELYCPPITVKVIDNR
142	6	3310	KLPSRPPPHYPGIK(1)-KLLSDKPQDFQIR(1)	Cross-Linked	BS3	3310	null	1.32e-05	0.00104	0.002367	0.714704	sDYSF(235)-sDYSF(258)/	Intra-Protein	1	1	15	14	1.74e-05	1.82e-08	2.98297	sDYSF	1	sDYSF	1	235	258	235	258	KLPSRPPPHYPGIK	KLLSDKPQDFQIR
143	4	2180	GAHFCLKVFR(7)-VEKYLR(3)	Cross-Linked	BS3	2180	Carbamidomethyl[C](5)	3.45e-10	0.00105	0.000452	0.207417	sDYSF(431)-sDYSF(632)/	Intra-Protein	1	1	23.5	9.5	1.09e-10	2.22e-09	2.97881	sDYSF	7	sDYSF	3	431	632	425	630	GAHFCLKVFR	VEKYLR
144	5	2220	DLSQMEALKR(9)-KTDAFRR(1)	Cross-Linked	BS3	2220	null	2.15e-13	0.00107	0.000284	0.12786	sDYSF(1104)-sDYSF(1132)/	Intra-Protein	1	1	15.5	12.5	3.51e-12	6.96e-15	2.97062	sDYSF	9	sDYSF	1	1104	1132	1096	1132	DLSQMEALKR	KTDAFRR
145	5	4890	KDPSEDKEDIESNLLRPTGVALR(7)-GYLKTSLCVLGPGDEAPLER(4)	Cross-Linked	BS3	4890	Carbamidomethyl[C](34)	3.24e-07	0.00113	0.004977	1.01685	sDYSF(408)-sDYSF(385)/	Intra-Protein	1	1	20.5	30.5	3.41e-07	3.28e-16	2.94692	sDYSF	7	sDYSF	4	408	385	402	382	KDPSEDKEDIESNLLRPTGVALR	GYLKTSLCVLGPGDEAPLER
146	3	3210	TVKGWWPCVAEEGEK(3)-DEPNMNPKLED(8)	Cross-Linked	BS3	3210	Carbamidomethyl[C](8)	6.91e-07	0.00117	-0.000909	-0.282784	sDYSF(2013)-sDYSF(2061)/	Intra-Protein	1	1	18	12	4.68e-11	1.04e-06	2.93181	sDYSF	3	sDYSF	8	2013	2061	2011	2054	TVKGWWPCVAEEGEK	DEPNMNPKLED
147	6	2780	KLPSRPPPHYPGIKR(1)-KRSAPTSR(1)	Cross-Linked	BS3	2780	null	2.95e-13	0.00118	-0.005356	-1.92482	sDYSF(235)-sDYSF(250)/	Intra-Protein	1	1	21.5	9.5	5.21e-09	9.75e-11	2.92812	sDYSF	1	sDYSF	1	235	250	235	250	KLPSRPPPHYPGIKR	KRSAPTSR
148	4	4950	DFDTLKVYDTQLENVEAFEGLSDFCNTFKLYR(29)-VTAAGQTKR(8)	Cross-Linked	BS3	4950	Carbamidomethyl[C](25)	8.88e-06	0.00118	0.005898	1.19238	sDYSF(1573)-sDYSF(297)/	Intra-Protein	1	1	52.5	7.5	1.78e-26	3.71e-06	2.92812	sDYSF	29	sDYSF	8	1573	297	1545	290	DFDTLKVYDTQLENVEAFEGLSDFCNTFKLYR	VTAAGQTKR
149	5	2510	LDKTESKIPAR(3)-EKCGSYLEK(2)	Cross-Linked	BS3	2510	Carbamidomethyl[C](17)	2.53e-12	0.00121	0.000183	0.072958	sDYSF(1944)-sDYSF(1537)/	Intra-Protein	1	1	16	11	1.49e-10	1.43e-06	2.91721	sDYSF	3	sDYSF	2	1944	1537	1942	1536	LDKTESKIPAR	EKCGSYLEK
150	4	3820	DDIECPLGWKWEDEEWSTDLNR(10)-KTDAFRR(1)	Cross-Linked	BS3	3820	Carbamidomethyl[C](5)	3.31e-07	0.00125	-0.006487	-1.6965	sDYSF(1040)-sDYSF(1132)/	Intra-Protein	1	1	48.5	7.5	1.09e-25	5.97e-07	2.90309	sDYSF	10	sDYSF	1	1040	1132	1031	1132	DDIECPLGWKWEDEEWSTDLNR	KTDAFRR
151	3	3680	FIFPFDYLPAEQVCTIAKK(18)-LDKTESKIPAR(3)	Cross-Linked	BS3	3680	Carbamidomethyl[C](14)	1.57e-13	0.00125	-0.000466	-0.126563	sDYSF(1935)-sDYSF(1944)/	Intra-Protein	1	1	29	11	6.61e-10	2.92e-13	2.90309	sDYSF	18	sDYSF	3	1935	1944	1918	1942	FIFPFDYLPAEQVCTIAKK	LDKTESKIPAR
152	7	5480	EFTGFPDPYTELNTGKGEGVAYRGR(16)-KDPSEDKEDIESNLLRPTGVALR(7)	Cross-Linked	BS3	5480	null	3.52e-08	0.00128	0.017311	3.15852	sDYSF(593)-sDYSF(408)/	Intra-Protein	1	1	23.5	24.5	3.38e-08	1.27e-08	2.89279	sDYSF	16	sDYSF	7	593	408	578	402	EFTGFPDPYTELNTGKGEGVAYRGR	KDPSEDKEDIESNLLRPTGVALR
153	4	2960	GKTQEETEDPSVIGEFK(2)-VTAAGQTKR(8)	Cross-Linked	BS3	2960	null	8.57e-06	0.00132	0.000255	0.086076	sDYSF(1578)-sDYSF(297)/	Intra-Protein	1	1	28	9	7.65e-18	3.37e-05	2.87943	sDYSF	2	sDYSF	8	1578	297	1577	290	GKTQEETEDPSVIGEFK	VTAAGQTKR
154	4	3240	FIFPFDYLPAEQVCTIAKK(18)-LDKTESK(3)	Cross-Linked	BS3	3240	Carbamidomethyl[C](14)	6.09e-22	0.00134	0.003488	1.07499	sDYSF(1935)-sDYSF(1944)/	Intra-Protein	1	1	40.5	5.5	1.73e-14	8.85e-11	2.8729	sDYSF	18	sDYSF	3	1935	1944	1918	1942	FIFPFDYLPAEQVCTIAKK	LDKTESK
155	3	2070	EKCGSYLEK(2)-KDAFWR(1)	Cross-Linked	BS3	2070	Carbamidomethyl[C](3)	1.62e-06	0.00134	-0.002179	-1.05113	sDYSF(1537)-sDYSF(1936)/	Intra-Protein	1	1	12	9	4.71e-07	1.94e-06	2.8729	sDYSF	2	sDYSF	1	1537	1936	1536	1936	EKCGSYLEK	KDAFWR
156	6	5270	KDPSEDKEDIESNLLRPTGVALR(7)-EFTGFPDPYTELNTGKGEGVAYR(16)	Cross-Linked	BS3	5270	null	1.33e-05	0.00144	-0.001264	-0.239957	sDYSF(408)-sDYSF(593)/	Intra-Protein	1	1	15.5	22.5	1.32e-05	1.32e-12	2.84164	sDYSF	7	sDYSF	16	408	593	402	578	KDPSEDKEDIESNLLRPTGVALR	EFTGFPDPYTELNTGKGEGVAYR
157	5	4350	VMFQDKEYSIEEIEAGRIPNPHLGPVEER(6)-VKAPVYR(2)	Cross-Linked	BS3	4350	null	0.000549	0.00146	0.004298	0.987538	sDYSF(1773)-sDYSF(1759)/	Intra-Protein	1	1	46.5	6.5	1.03e-17	0.000697	2.83565	sDYSF	6	sDYSF	2	1773	1759	1768	1758	VMFQDKEYSIEEIEAGRIPNPHLGPVEER	VKAPVYR
158	4	4410	LYRGKTQEETEDPSVIGEFK(5)-EELYCPPITVKVIDNR(11)	Cross-Linked	BS3	4410	Carbamidomethyl[C](28)	7.78e-12	0.00153	0.00307	0.696268	sDYSF(1578)-sDYSF(1451)/	Intra-Protein	1	1	18	33	7.39e-12	2.12e-14	2.81531	sDYSF	5	sDYSF	11	1578	1451	1574	1441	LYRGKTQEETEDPSVIGEFK	EELYCPPITVKVIDNR
159	4	2070	EKCGSYLEK(2)-LDKTESK(3)	Cross-Linked	BS3	2070	Carbamidomethyl[C](3)	1.95e-06	0.00153	0.002451	1.18347	sDYSF(1537)-sDYSF(1944)/	Intra-Protein	1	1	9.5	7.5	3.1e-09	4.84e-06	2.81531	sDYSF	2	sDYSF	3	1537	1944	1536	1942	EKCGSYLEK	LDKTESK
160	6	3470	KLPSRPPPHYPGIKR(1)-KLLSDKPQDFQIR(1)	Cross-Linked	BS3	3470	null	1.91e-08	0.00162	0.001078	0.310845	sDYSF(235)-sDYSF(258)/	Intra-Protein	1	1	23.5	12.5	3.54e-08	3.1e-10	2.79048	sDYSF	1	sDYSF	1	235	258	235	258	KLPSRPPPHYPGIKR	KLLSDKPQDFQIR
161	5	4370	VMFQDKEYSIEEIEAGRIPNPHLGPVEER(6)-VKAPVYR(2)	Cross-Linked	BS3	4370	Oxidation[M](2)	0.000126	0.00163	-0.014256	-3.26356	sDYSF(1773)-sDYSF(1759)/	Intra-Protein	1	1	52.5	8.5	2.6e-18	0.000114	2.78781	sDYSF	6	sDYSF	2	1773	1759	1768	1758	VMFQDKEYSIEEIEAGRIPNPHLGPVEER	VKAPVYR
162	5	4360	FIFPFDYLPAEQVCTIAKK(18)-DAFWRLDKTESKIPAR(8)	Cross-Linked	BS3	4360	Carbamidomethyl[C](14)	8.3e-09	0.00168	-0.000346	-0.079407	sDYSF(1935)-sDYSF(1944)/	Intra-Protein	1	1	38	15	1.7e-15	1.16e-09	2.77469	sDYSF	18	sDYSF	8	1935	1944	1918	1937	FIFPFDYLPAEQVCTIAKK	DAFWRLDKTESKIPAR
163	3	3980	GKTQEETEDPSVIGEFK(2)-EELYCPPITVKVIDNR(11)	Cross-Linked	BS3	3980	Carbamidomethyl[C](25)	3.15e-09	0.00171	0.000912	0.22932	sDYSF(1578)-sDYSF(1451)/	Intra-Protein	1	1	14	23	1.15e-13	4.56e-11	2.767	sDYSF	2	sDYSF	11	1578	1451	1577	1441	GKTQEETEDPSVIGEFK	EELYCPPITVKVIDNR
164	5	2220	LDKTESKIPAR(7)-KDAFWR(1)	Cross-Linked	BS3	2220	null	1.43e-08	0.00181	-0.000957	-0.431625	sDYSF(1948)-sDYSF(1936)/	Intra-Protein	1	1	13.5	7.5	2.31e-07	1.03e-09	2.74232	sDYSF	7	sDYSF	1	1948	1936	1942	1936	LDKTESKIPAR	KDAFWR
165	4	4380	DPSEDKEDIESNLLRPTGVALR(6)-KWLLLSDPDDFSAGAR(1)	Cross-Linked	BS3	4380	null	6.6e-12	0.00193	0.004295	0.980098	sDYSF(408)-sDYSF(366)/	Intra-Protein	1	1	20.5	31.5	5.87e-10	6.53e-25	2.71444	sDYSF	6	sDYSF	1	408	366	403	366	DPSEDKEDIESNLLRPTGVALR	KWLLLSDPDDFSAGAR
166	3	3210	TVKGWWPCVAEEGEK(3)-DEPNMNPKLED(8)	Cross-Linked	BS3	3210	Carbamidomethyl[C](8)	7.3e-10	0.00194	-0.003632	-1.12989	sDYSF(2013)-sDYSF(2061)/	Intra-Protein	1	1	20	16	1.03e-11	4.45e-09	2.7122	sDYSF	3	sDYSF	8	2013	2061	2011	2054	TVKGWWPCVAEEGEK	DEPNMNPKLED
167	6	2700	KLPSRPPPHYPGIKR(1)-KDAFWR(1)	Cross-Linked	BS3	2700	null	1.57e-08	0.002	0.001415	0.523588	sDYSF(235)-sDYSF(1936)/	Intra-Protein	1	1	21.5	10.5	1.6e-08	1.26e-07	2.69897	sDYSF	1	sDYSF	1	235	1936	235	1936	KLPSRPPPHYPGIKR	KDAFWR
168	4	4230	VYDTQLENVEAFEGLSDFCNTFKLYR(23)-VTAAGQTKR(8)	Cross-Linked	BS3	4230	Carbamidomethyl[C](19)	3.54e-05	0.00211	-0.003854	-0.911743	sDYSF(1573)-sDYSF(297)/	Intra-Protein	1	1	47.5	8.5	3.22e-24	3.05e-05	2.67572	sDYSF	23	sDYSF	8	1573	297	1551	290	VYDTQLENVEAFEGLSDFCNTFKLYR	VTAAGQTKR
169	5	4510	KDPSEDKEDIESNLLRPTGVALR(7)-KWLLLSDPDDFSAGAR(1)	Cross-Linked	BS3	4510	null	7.33e-08	0.00211	0.010118	2.2433	sDYSF(408)-sDYSF(366)/	Intra-Protein	1	1	18.5	25.5	2.16e-08	2.8e-12	2.67572	sDYSF	7	sDYSF	1	408	366	402	366	KDPSEDKEDIESNLLRPTGVALR	KWLLLSDPDDFSAGAR
170	4	4420	GKTQEETEDPSVIGEFKGLFK(2)-EELYCPPITVKVIDNR(11)	Cross-Linked	BS3	4420	Carbamidomethyl[C](29)	3.14e-12	0.00214	0.001833	0.414496	sDYSF(1578)-sDYSF(1451)/	Intra-Protein	1	1	24	26	2.12e-11	1.31e-14	2.66959	sDYSF	2	sDYSF	11	1578	1451	1577	1441	GKTQEETEDPSVIGEFKGLFK	EELYCPPITVKVIDNR
171	3	2370	KLLSDKPQDFQIR(6)-ISIGKK(5)	Cross-Linked	BS3	2370	null	7.94e-06	0.00217	-0.001336	-0.563624	sDYSF(263)-sDYSF(1656)/	Intra-Protein	1	1	26.5	7.5	5.4e-16	2.22e-05	2.66354	sDYSF	6	sDYSF	5	263	1656	258	1652	KLLSDKPQDFQIR	ISIGKK
172	3	3230	TVKGWWPCVAEEGEK(3)-DEPNMNPKLED(8)	Cross-Linked	BS3	3230	Carbamidomethyl[C](8);Oxidation[M](23)	2.48e-09	0.00222	0.000667	0.206472	sDYSF(2013)-sDYSF(2061)/	Intra-Protein	1	1	24	23	1.71e-15	1.17e-08	2.65365	sDYSF	3	sDYSF	8	2013	2061	2011	2054	TVKGWWPCVAEEGEK	DEPNMNPKLED
173	4	4470	EELYCPPITVKVIDNRQFGR(11)-GKTQEETEDPSVIGEFK(2)	Cross-Linked	BS3	4470	Carbamidomethyl[C](5)	4.44e-12	0.00232	0.000667	0.149377	sDYSF(1451)-sDYSF(1578)/	Intra-Protein	1	1	29	22	2.33e-13	1.26e-11	2.63451	sDYSF	11	sDYSF	2	1451	1578	1441	1577	EELYCPPITVKVIDNRQFGR	GKTQEETEDPSVIGEFK
174	6	3930	QAEAEGEGWEYASLFGWKFHLEYR(18)-KTDAFRR(1)	Cross-Linked	BS3	3930	null	3.56e-07	0.00232	0.00442	1.12357	sDYSF(1125)-sDYSF(1132)/	Intra-Protein	1	1	34.5	9.5	1.48e-17	1.3e-07	2.63451	sDYSF	18	sDYSF	1	1125	1132	1108	1132	QAEAEGEGWEYASLFGWKFHLEYR	KTDAFRR
175	3	4120	DDIECPLGWKWEDEEWSTDLNR(10)-DLSQMEALKR(9)	Cross-Linked	BS3	4120	Carbamidomethyl[C](5)	1.12e-08	0.00233	-0.003657	-0.88743	sDYSF(1040)-sDYSF(1104)/	Intra-Protein	1	1	33	14	2.15e-21	1.18e-07	2.63264	sDYSF	10	sDYSF	9	1040	1104	1031	1096	DDIECPLGWKWEDEEWSTDLNR	DLSQMEALKR
176	5	4890	KDPSEDKEDIESNLLRPTGVALR(7)-GYLKTSLCVLGPGDEAPLER(4)	Cross-Linked	BS3	4890	Carbamidomethyl[C](34)	1.37e-08	0.00235	0.004977	1.01685	sDYSF(408)-sDYSF(385)/	Intra-Protein	1	1	16.5	30.5	4.89e-07	9.18e-20	2.62893	sDYSF	7	sDYSF	4	408	385	402	382	KDPSEDKEDIESNLLRPTGVALR	GYLKTSLCVLGPGDEAPLER
177	5	3520	KWLLLSDPDDFSAGAR(1)-KLLSDKPQDFQIR(1)	Cross-Linked	BS3	3520	null	6.39e-06	0.00235	0.001864	0.53017	sDYSF(366)-sDYSF(258)/	Intra-Protein	1	1	19.5	12.5	3.89e-06	9.99e-06	2.62893	sDYSF	1	sDYSF	1	366	258	366	258	KWLLLSDPDDFSAGAR	KLLSDKPQDFQIR
178	3	3240	FIFPFDYLPAEQVCTIAKK(18)-LDKTESK(3)	Cross-Linked	BS3	3240	Carbamidomethyl[C](14)	5.35e-08	0.00236	0.003752	1.15635	sDYSF(1935)-sDYSF(1944)/	Intra-Protein	1	1	34.5	7.5	8.27e-14	3.92e-08	2.62709	sDYSF	18	sDYSF	3	1935	1944	1918	1942	FIFPFDYLPAEQVCTIAKK	LDKTESK
179	3	1780	LDKTESK(3)-KDAFWR(1)	Cross-Linked	BS3	1780	null	5.38e-07	0.00237	0.000385	0.216301	sDYSF(1944)-sDYSF(1936)/	Intra-Protein	1	1	10	6	2.39e-06	1.28e-07	2.62525	sDYSF	3	sDYSF	1	1944	1936	1942	1936	LDKTESK	KDAFWR
180	5	2510	LDKTESKIPAR(3)-EKCGSYLEK(2)	Cross-Linked	BS3	2510	Carbamidomethyl[C](17)	1.94e-09	0.00241	0.000183	0.072958	sDYSF(1944)-sDYSF(1537)/	Intra-Protein	1	1	16	12	3.59e-09	1.68e-10	2.61798	sDYSF	3	sDYSF	2	1944	1537	1942	1536	LDKTESKIPAR	EKCGSYLEK
181	5	4900	DLAAMDKDSFSDPYAIVSFLHQSQK(7)-EELYCPPITVKVIDNR(11)	Cross-Linked	BS3	4900	Carbamidomethyl[C](33)	4.85e-10	0.00253	-0.002753	-0.562249	sDYSF(1216)-sDYSF(1451)/	Intra-Protein	1	1	30	22	1.42e-09	4.53e-09	2.59688	sDYSF	7	sDYSF	11	1216	1451	1210	1441	DLAAMDKDSFSDPYAIVSFLHQSQK	EELYCPPITVKVIDNR
182	5	2220	LDKTESKIPAR(7)-KDAFWR(1)	Cross-Linked	BS3	2220	null	7.59e-07	0.00259	-0.000415	-0.187173	sDYSF(1948)-sDYSF(1936)/	Intra-Protein	1	1	15.5	10.5	3.28e-07	5.07e-07	2.5867	sDYSF	7	sDYSF	1	1948	1936	1942	1936	LDKTESKIPAR	KDAFWR
183	3	3450	DLKITLYDYDLLSK(3)-DEKIGETVVDLENR(3)	Cross-Linked	BS3	3450	null	6.83e-06	0.00261	0.001169	0.338469	sDYSF(1691)-sDYSF(1705)/	Intra-Protein	1	1	14	14	4.41e-05	6.57e-06	2.58336	sDYSF	3	sDYSF	3	1691	1705	1689	1703	DLKITLYDYDLLSK	DEKIGETVVDLENR
184	4	4070	HRQAEAEGEGWEYASLFGWKFHLEYR(20)-KTDAFR(1)	Cross-Linked	BS3	4070	null	1.57e-06	0.00262	0.008515	2.09165	sDYSF(1125)-sDYSF(1132)/	Intra-Protein	1	1	52	6	6.16e-19	7.87e-06	2.5817	sDYSF	20	sDYSF	1	1125	1132	1106	1132	HRQAEAEGEGWEYASLFGWKFHLEYR	KTDAFR
185	5	4310	QLPGVNIKPVVKVTAAGQTKR(12)-ISAPGGEIEEEPAGAVKPSK(17)	Cross-Linked	BS3	4310	null	1.55e-09	0.00266	-0.00347	-0.805591	sDYSF(289)-sDYSF(548)/	Intra-Protein	1	1	24	23	2.67e-08	1.18e-08	2.57512	sDYSF	12	sDYSF	17	289	548	278	532	QLPGVNIKPVVKVTAAGQTKR	ISAPGGEIEEEPAGAVKPSK
186	3	3380	EELYCPPITVKVIDNR(11)-DEPNMNPKLED(8)	Cross-Linked	BS3	3380	Carbamidomethyl[C](5)	1.49e-06	0.00272	0.00181	0.53477	sDYSF(1451)-sDYSF(2061)/	Intra-Protein	1	1	26	13	1.07e-15	2.02e-06	2.56543	sDYSF	11	sDYSF	8	1451	2061	1441	2054	EELYCPPITVKVIDNR	DEPNMNPKLED
187	5	4070	HRQAEAEGEGWEYASLFGWKFHLEYR(20)-KTDAFR(1)	Cross-Linked	BS3	4070	null	5.25e-05	0.00274	0.00177	0.434787	sDYSF(1125)-sDYSF(1132)/	Intra-Protein	1	1	54.5	4.5	5.93e-17	5.64e-05	2.56225	sDYSF	20	sDYSF	1	1125	1132	1106	1132	HRQAEAEGEGWEYASLFGWKFHLEYR	KTDAFR
188	4	4230	LSVFAETYENETKLALVGNWGTTGLTYPK(13)-KTDAFRR(1)	Cross-Linked	BS3	4230	null	6.57e-05	0.00278	0.000806	0.1904	sDYSF(934)-sDYSF(1132)/	Intra-Protein	1	1	52	7	1.05e-15	4.51e-05	2.55596	sDYSF	13	sDYSF	1	934	1132	922	1132	LSVFAETYENETKLALVGNWGTTGLTYPK	KTDAFRR
189	4	3330	FIFPFDYLPAEQVCTIAKK(18)-TESKIPAR(4)	Cross-Linked	BS3	3330	Carbamidomethyl[C](14)	1.26e-07	0.00282	0.004283	1.28783	sDYSF(1935)-sDYSF(1948)/	Intra-Protein	1	1	33	8	7.67e-11	2.62e-08	2.54975	sDYSF	18	sDYSF	4	1935	1948	1918	1945	FIFPFDYLPAEQVCTIAKK	TESKIPAR
190	4	3180	GKTQEETEDPSVIGEFK(2)-YPMEKVPGAR(5)	Cross-Linked	BS3	3180	null	2.79e-09	0.00294	-0.009319	-2.93183	sDYSF(1578)-sDYSF(889)/	Intra-Protein	1	1	31	13	6.07e-14	8.29e-08	2.53165	sDYSF	2	sDYSF	5	1578	889	1577	885	GKTQEETEDPSVIGEFK	YPMEKVPGAR
191	6	4890	KDPSEDKEDIESNLLRPTGVALR(1)-GYLKTSLCVLGPGDEAPLER(4)	Cross-Linked	BS3	4890	Carbamidomethyl[C](34)	4.16e-06	0.00313	0.00428	0.874448	sDYSF(402)-sDYSF(385)/	Intra-Protein	1	1	15.5	25.5	1.49e-05	2.72e-19	2.50446	sDYSF	1	sDYSF	4	402	385	402	382	KDPSEDKEDIESNLLRPTGVALR	GYLKTSLCVLGPGDEAPLER
192	3	2370	KLLSDKPQDFQIR(6)-ISIGKK(5)	Cross-Linked	BS3	2370	null	8.58e-07	0.00318	-0.001336	-0.563624	sDYSF(263)-sDYSF(1656)/	Intra-Protein	1	1	23	8	3.37e-25	3.35e-07	2.49757	sDYSF	6	sDYSF	5	263	1656	258	1652	KLLSDKPQDFQIR	ISIGKK
193	5	4480	LVEHSEQKVEDLPADDILR(8)-NLVDPFVEVSFAGKMLCSK(14)	Cross-Linked	BS3	4480	Carbamidomethyl[C](39)	1.5e-08	0.00319	0.001479	0.329819	sDYSF(618)-sDYSF(474)/	Intra-Protein	1	1	23	22	2.42e-08	6.57e-09	2.49621	sDYSF	8	sDYSF	14	618	474	611	461	LVEHSEQKVEDLPADDILR	NLVDPFVEVSFAGKMLCSK
194	6	4510	KDPSEDKEDIESNLLRPTGVALR(7)-KWLLLSDPDDFSAGAR(1)	Cross-Linked	BS3	4510	null	2.63e-09	0.00329	0.016203	3.59244	sDYSF(408)-sDYSF(366)/	Intra-Protein	1	1	18.5	21.5	1.59e-08	1.93e-14	2.4828	sDYSF	7	sDYSF	1	408	366	402	366	KDPSEDKEDIESNLLRPTGVALR	KWLLLSDPDDFSAGAR
195	4	4510	KDPSEDKEDIESNLLRPTGVALR(1)-KWLLLSDPDDFSAGAR(1)	Cross-Linked	BS3	4510	null	1.33e-14	0.00333	0.003745	0.83032	sDYSF(402)-sDYSF(366)/	Intra-Protein	1	1	23.5	32.5	3.49e-17	4.4e-26	2.47756	sDYSF	1	sDYSF	1	402	366	402	366	KDPSEDKEDIESNLLRPTGVALR	KWLLLSDPDDFSAGAR
196	4	3730	FIFPFDYLPAEQVCTIAKK(18)-DPNGKCDPYIK(5)	Cross-Linked	BS3	3730	Carbamidomethyl[C](14);Carbamidomethyl[C](28)	8.86e-11	0.00334	0.000153	0.041009	sDYSF(1935)-sDYSF(1645)/	Intra-Protein	1	1	31.5	10.5	8.72e-12	5.5e-11	2.47625	sDYSF	18	sDYSF	5	1935	1645	1918	1641	FIFPFDYLPAEQVCTIAKK	DPNGKCDPYIK
197	6	7240	ISAPGGEIEEEPAGAVKPSKASDLDDYLGFLPTFGPCYINLYGSPR(17)-QLPGVNIKPVVKVTAAGQTKR(12)	Cross-Linked	BS3	7240	Carbamidomethyl[C](37)	4.19e-08	0.00339	-0.017083	-2.35961	sDYSF(548)-sDYSF(289)/	Intra-Protein	1	1	37.5	21.5	7.57e-16	4.95e-08	2.4698	sDYSF	17	sDYSF	12	548	289	532	278	ISAPGGEIEEEPAGAVKPSKASDLDDYLGFLPTFGPCYINLYGSPR	QLPGVNIKPVVKVTAAGQTKR
198	5	3960	QLPGVNIKPVVKVTAAGQTKR(12)-DEKIGETVVDLENR(3)	Cross-Linked	BS3	3960	null	9.51e-07	0.00342	0.000928	0.23445	sDYSF(289)-sDYSF(1705)/	Intra-Protein	1	1	21.5	16.5	8.21e-07	1.05e-08	2.46597	sDYSF	12	sDYSF	3	289	1705	278	1703	QLPGVNIKPVVKVTAAGQTKR	DEKIGETVVDLENR
199	5	3680	FIFPFDYLPAEQVCTIAKK(18)-LDKTESKIPAR(7)	Cross-Linked	BS3	3680	Carbamidomethyl[C](14)	2.37e-14	0.00354	0.004941	1.34195	sDYSF(1935)-sDYSF(1948)/	Intra-Protein	1	1	33	9	3.82e-11	3.12e-14	2.451	sDYSF	18	sDYSF	7	1935	1948	1918	1942	FIFPFDYLPAEQVCTIAKK	LDKTESKIPAR
200	5	3980	GKTQEETEDPSVIGEFK(2)-EELYCPPITVKVIDNR(11)	Cross-Linked	BS3	3980	Carbamidomethyl[C](25)	2.61e-07	0.00357	0.004671	1.17451	sDYSF(1578)-sDYSF(1451)/	Intra-Protein	1	1	15	25	1.08e-07	1.55e-07	2.44733	sDYSF	2	sDYSF	11	1578	1451	1577	1441	GKTQEETEDPSVIGEFK	EELYCPPITVKVIDNR
201	3	2260	DPNGKCDPYIK(5)-LDKTESK(3)	Cross-Linked	BS3	2260	Carbamidomethyl[C](6)	7.72e-09	0.00371	0.00217	0.958433	sDYSF(1645)-sDYSF(1944)/	Intra-Protein	1	1	25.5	13.5	9.48e-17	1.54e-07	2.43063	sDYSF	5	sDYSF	3	1645	1944	1641	1942	DPNGKCDPYIK	LDKTESK
202	4	3850	EFTGFPDPYTELNTGKGEGVAYR(16)-YPMEKVPGAR(5)	Cross-Linked	BS3	3850	Oxidation[M](29)	2.15e-08	0.00371	-0.000101	-0.026242	sDYSF(593)-sDYSF(889)/	Intra-Protein	1	1	45.5	14.5	2.52e-16	8.1e-08	2.43063	sDYSF	16	sDYSF	5	593	889	578	885	EFTGFPDPYTELNTGKGEGVAYR	YPMEKVPGAR
203	6	4610	KDPSEDKEDIESNLLRPTGVALR(1)-GKTQEETEDPSVIGEFK(2)	Cross-Linked	BS3	4610	null	2.31e-09	0.00376	0.0046	0.997115	sDYSF(402)-sDYSF(1578)/	Intra-Protein	1	1	17	20	2.15e-11	8.17e-11	2.42481	sDYSF	1	sDYSF	2	402	1578	402	1577	KDPSEDKEDIESNLLRPTGVALR	GKTQEETEDPSVIGEFK
204	5	4560	VLPKDDIECPLGWKWEDEEWSTDLNR(14)-DLSQMEALKR(9)	Cross-Linked	BS3	4560	Carbamidomethyl[C](9)	0.000306	0.00376	0.001396	0.306262	sDYSF(1040)-sDYSF(1104)/	Intra-Protein	1	1	28.5	12.5	3.49e-11	0.00043	2.42481	sDYSF	14	sDYSF	9	1040	1104	1027	1096	VLPKDDIECPLGWKWEDEEWSTDLNR	DLSQMEALKR
205	4	4010	FIFPFDYLPAEQVCTIAKK(18)-KLLSDKPQDFQIR(1)	Cross-Linked	BS3	4010	Carbamidomethyl[C](14)	1.04e-10	0.0038	0.008256	2.05776	sDYSF(1935)-sDYSF(258)/	Intra-Protein	1	1	29	17	4.63e-10	1.18e-11	2.42022	sDYSF	18	sDYSF	1	1935	258	1918	258	FIFPFDYLPAEQVCTIAKK	KLLSDKPQDFQIR
206	6	3470	KLPSRPPPHYPGIKR(1)-KLLSDKPQDFQIR(6)	Cross-Linked	BS3	3470	null	1.56e-06	0.00385	0.004759	1.37227	sDYSF(235)-sDYSF(263)/	Intra-Protein	1	1	17.5	18.5	2.15e-06	8.56e-09	2.41454	sDYSF	1	sDYSF	6	235	263	235	258	KLPSRPPPHYPGIKR	KLLSDKPQDFQIR
207	4	4410	NMKSYQLANISSPSLVVECGGQTVQSCVIR(3)-VTAAGQTKR(8)	Cross-Linked	BS3	4410	Carbamidomethyl[C](19);Carbamidomethyl[C](27);Oxidation[M](2)	8.58e-06	0.00385	0.009791	2.22007	sDYSF(1392)-sDYSF(297)/	Intra-Protein	1	1	72.5	11.5	2.74e-27	1.31e-05	2.41454	sDYSF	3	sDYSF	8	1392	297	1390	290	NMKSYQLANISSPSLVVECGGQTVQSCVIR	VTAAGQTKR
208	4	4560	VLPKDDIECPLGWKWEDEEWSTDLNR(14)-DLSQMEALKR(9)	Cross-Linked	BS3	4560	Carbamidomethyl[C](9)	7.49e-06	0.00396	-0.000263	-0.057698	sDYSF(1040)-sDYSF(1104)/	Intra-Protein	1	1	23.5	11.5	1.68e-12	3.38e-05	2.4023	sDYSF	14	sDYSF	9	1040	1104	1027	1096	VLPKDDIECPLGWKWEDEEWSTDLNR	DLSQMEALKR
209	4	4510	KDPSEDKEDIESNLLRPTGVALR(7)-KWLLLSDPDDFSAGAR(1)	Cross-Linked	BS3	4510	null	2.13e-11	0.00402	0.005092	1.12897	sDYSF(408)-sDYSF(366)/	Intra-Protein	1	1	25	39	7.49e-29	1.01e-28	2.39577	sDYSF	7	sDYSF	1	408	366	402	366	KDPSEDKEDIESNLLRPTGVALR	KWLLLSDPDDFSAGAR
210	4	1890	VTAAGQTKR(8)-KDAFWR(1)	Cross-Linked	BS3	1890	null	2.71e-07	0.00416	-0.001353	-0.715487	sDYSF(297)-sDYSF(1936)/	Intra-Protein	1	1	12.5	6.5	6.55e-06	1.74e-08	2.38091	sDYSF	8	sDYSF	1	297	1936	290	1936	VTAAGQTKR	KDAFWR
211	6	5270	KDPSEDKEDIESNLLRPTGVALR(7)-EFTGFPDPYTELNTGKGEGVAYR(16)	Cross-Linked	BS3	5270	null	0.000358	0.00422	-0.001264	-0.239957	sDYSF(408)-sDYSF(593)/	Intra-Protein	1	1	17.5	23.5	0.000228	2.12e-11	2.37469	sDYSF	7	sDYSF	16	408	593	402	578	KDPSEDKEDIESNLLRPTGVALR	EFTGFPDPYTELNTGKGEGVAYR
212	4	3330	FIFPFDYLPAEQVCTIAKK(18)-TESKIPAR(4)	Cross-Linked	BS3	3330	Carbamidomethyl[C](14)	2.27e-05	0.00425	0.004193	1.26077	sDYSF(1935)-sDYSF(1948)/	Intra-Protein	1	1	30.5	9.5	2.58e-10	1.58e-05	2.37161	sDYSF	18	sDYSF	4	1935	1948	1918	1945	FIFPFDYLPAEQVCTIAKK	TESKIPAR
213	3	3210	TVKGWWPCVAEEGEK(3)-DEPNMNPKLED(8)	Cross-Linked	BS3	3210	Carbamidomethyl[C](8)	2.03e-11	0.00484	-0.00096	-0.298649	sDYSF(2013)-sDYSF(2061)/	Intra-Protein	1	1	22	19	7.04e-14	2.65e-10	2.31515	sDYSF	3	sDYSF	8	2013	2061	2011	2054	TVKGWWPCVAEEGEK	DEPNMNPKLED
214	3	3670	DDIECPLGWKWEDEEWSTDLNR(10)-KTDAFR(1)	Cross-Linked	BS3	3670	Carbamidomethyl[C](5)	5.85e-09	0.00492	-0.00501	-1.36599	sDYSF(1040)-sDYSF(1132)/	Intra-Protein	1	1	30.5	4.5	9.41e-20	2.94e-08	2.30803	sDYSF	10	sDYSF	1	1040	1132	1031	1132	DDIECPLGWKWEDEEWSTDLNR	KTDAFR
215	5	4860	DLAAMDKDSFSDPYAIVSFLHQSQK(7)-GKTQEETEDPSVIGEFK(2)	Cross-Linked	BS3	4860	Oxidation[M](5)	5.01e-06	0.00498	0.011178	2.29985	sDYSF(1216)-sDYSF(1578)/	Intra-Protein	1	1	34	12	4.45e-09	1.09e-05	2.30277	sDYSF	7	sDYSF	2	1216	1578	1210	1577	DLAAMDKDSFSDPYAIVSFLHQSQK	GKTQEETEDPSVIGEFK
216	4	2150	EKCGSYLEK(2)-TESKIPAR(4)	Cross-Linked	BS3	2150	Carbamidomethyl[C](3)	5.48e-08	0.00503	0.002092	0.972076	sDYSF(1537)-sDYSF(1948)/	Intra-Protein	1	1	10.5	14.5	1.65e-08	1.3e-07	2.29843	sDYSF	2	sDYSF	4	1537	1948	1536	1945	EKCGSYLEK	TESKIPAR
217	3	4230	VYDTQLENVEAFEGLSDFCNTFKLYR(23)-VTAAGQTKR(8)	Cross-Linked	BS3	4230	Carbamidomethyl[C](19)	4.02e-07	0.00508	-0.003709	-0.87744	sDYSF(1573)-sDYSF(297)/	Intra-Protein	1	1	38.5	9.5	2.1e-20	7.55e-07	2.29414	sDYSF	23	sDYSF	8	1573	297	1551	290	VYDTQLENVEAFEGLSDFCNTFKLYR	VTAAGQTKR
218	6	4230	HRQAEAEGEGWEYASLFGWKFHLEYR(20)-KTDAFRR(1)	Cross-Linked	BS3	4230	null	2.55e-07	0.00515	0.002195	0.519274	sDYSF(1125)-sDYSF(1132)/	Intra-Protein	1	1	40.5	8.5	1.11e-17	4.76e-07	2.28819	sDYSF	20	sDYSF	1	1125	1132	1106	1132	HRQAEAEGEGWEYASLFGWKFHLEYR	KTDAFRR
219	5	2510	LDKTESKIPAR(3)-EKCGSYLEK(2)	Cross-Linked	BS3	2510	Carbamidomethyl[C](17)	1.08e-08	0.00522	0.000183	0.072958	sDYSF(1944)-sDYSF(1537)/	Intra-Protein	1	1	18	15	5.01e-09	1.29e-07	2.28233	sDYSF	3	sDYSF	2	1944	1537	1942	1536	LDKTESKIPAR	EKCGSYLEK
220	6	4350	VMFQDKEYSIEEIEAGRIPNPHLGPVEER(6)-VKAPVYR(2)	Cross-Linked	BS3	4350	null	4.95e-05	0.00533	0.006793	1.56081	sDYSF(1773)-sDYSF(1759)/	Intra-Protein	1	1	39.5	9.5	7.68e-17	1.37e-05	2.27327	sDYSF	6	sDYSF	2	1773	1759	1768	1758	VMFQDKEYSIEEIEAGRIPNPHLGPVEER	VKAPVYR
221	6	3470	KLPSRPPPHYPGIKR(1)-KLLSDKPQDFQIR(1)	Cross-Linked	BS3	3470	null	4.4e-07	0.00552	-0.00054	-0.155711	sDYSF(235)-sDYSF(258)/	Intra-Protein	1	1	22.5	15.5	5.79e-07	2.06e-10	2.25806	sDYSF	1	sDYSF	1	235	258	235	258	KLPSRPPPHYPGIKR	KLLSDKPQDFQIR
222	6	2710	KLPSRPPPHYPGIKR(1)-VKAPVYR(2)	Cross-Linked	BS3	2710	null	1.13e-05	0.0056	-0.001226	-0.451968	sDYSF(235)-sDYSF(1759)/	Intra-Protein	1	1	17.5	8.5	1.31e-05	5.43e-05	2.25181	sDYSF	1	sDYSF	2	235	1759	235	1758	KLPSRPPPHYPGIKR	VKAPVYR
223	4	4890	KDPSEDKEDIESNLLRPTGVALR(1)-GYLKTSLCVLGPGDEAPLER(4)	Cross-Linked	BS3	4890	Carbamidomethyl[C](34)	2.68e-06	0.00564	0.000381	0.077842	sDYSF(402)-sDYSF(385)/	Intra-Protein	1	1	16	41	1.94e-10	2.04e-15	2.24872	sDYSF	1	sDYSF	4	402	385	402	382	KDPSEDKEDIESNLLRPTGVALR	GYLKTSLCVLGPGDEAPLER
224	5	2560	KLPSRPPPHYPGIK(1)-VKAPVYR(2)	Cross-Linked	BS3	2560	null	2.99e-05	0.00585	0.000676	0.264426	sDYSF(235)-sDYSF(1759)/	Intra-Protein	1	1	25	11	7.37e-08	6.41e-05	2.23284	sDYSF	1	sDYSF	2	235	1759	235	1758	KLPSRPPPHYPGIK	VKAPVYR
225	6	6160	DFDTLKVYDTQLENVEAFEGLSDFCNTFK(6)-KDPSEDKEDIESNLLRPTGVALR(1)	Cross-Linked	BS3	6160	Carbamidomethyl[C](25)	0.000812	0.00597	0.012697	2.05954	sDYSF(1550)-sDYSF(402)/	Intra-Protein	1	1	34	12	4.9e-19	0.000933	2.22403	sDYSF	6	sDYSF	1	1550	402	1545	402	DFDTLKVYDTQLENVEAFEGLSDFCNTFK	KDPSEDKEDIESNLLRPTGVALR
226	4	2150	EKCGSYLEK(2)-TESKIPAR(4)	Cross-Linked	BS3	2150	Carbamidomethyl[C](3)	3.09e-07	0.00632	0.002092	0.972076	sDYSF(1537)-sDYSF(1948)/	Intra-Protein	1	1	11.5	13.5	3.18e-08	2.34e-06	2.19928	sDYSF	2	sDYSF	4	1537	1948	1536	1945	EKCGSYLEK	TESKIPAR
227	6	4890	KDPSEDKEDIESNLLRPTGVALR(7)-GYLKTSLCVLGPGDEAPLER(4)	Cross-Linked	BS3	4890	Carbamidomethyl[C](34)	9.47e-05	0.00657	0.001235	0.252323	sDYSF(408)-sDYSF(385)/	Intra-Protein	1	1	18.5	29.5	0.000165	1.18e-13	2.18243	sDYSF	7	sDYSF	4	408	385	402	382	KDPSEDKEDIESNLLRPTGVALR	GYLKTSLCVLGPGDEAPLER
228	6	4310	QLPGVNIKPVVKVTAAGQTKR(12)-ISAPGGEIEEEPAGAVKPSK(17)	Cross-Linked	BS3	4310	null	1.04e-08	0.00664	-0.008244	-1.91392	sDYSF(289)-sDYSF(548)/	Intra-Protein	1	1	24	23	6.1e-08	3.38e-08	2.17783	sDYSF	12	sDYSF	17	289	548	278	532	QLPGVNIKPVVKVTAAGQTKR	ISAPGGEIEEEPAGAVKPSK
229	5	3950	KCSLDQLDDAFHPEWFVSLFEQK(1)-MPKPAKTAK(6)	Cross-Linked	BS3	3950	Carbamidomethyl[C](2)	0.000373	0.00678	-0.001919	-0.486072	sDYSF(1988)-sDYSF(1984)/	Intra-Protein	1	1	38.5	8.5	1.17e-19	0.000429	2.16877	sDYSF	1	sDYSF	6	1988	1984	1988	1979	KCSLDQLDDAFHPEWFVSLFEQK	MPKPAKTAK
230	4	2510	LDKTESKIPAR(7)-EKCGSYLEK(2)	Cross-Linked	BS3	2510	Carbamidomethyl[C](17)	3.45e-08	0.00696	0.000276	0.110035	sDYSF(1948)-sDYSF(1537)/	Intra-Protein	1	1	11	10	1.43e-08	8.51e-07	2.15739	sDYSF	7	sDYSF	2	1948	1537	1942	1536	LDKTESKIPAR	EKCGSYLEK
231	4	4480	EFTGFPDPYTELNTGKGEGVAYR(16)-KWLLLSDPDDFSAGAR(1)	Cross-Linked	BS3	4480	null	4.99e-09	0.00697	-0.001124	-0.251108	sDYSF(593)-sDYSF(366)/	Intra-Protein	1	1	24.5	17.5	1.16e-08	1.35e-10	2.15677	sDYSF	16	sDYSF	1	593	366	578	366	EFTGFPDPYTELNTGKGEGVAYR	KWLLLSDPDDFSAGAR
232	7	3930	QLPGVNIKPVVKVTAAGQTKR(12)-KLLSDKPQDFQIR(1)	Cross-Linked	BS3	3930	null	6.62e-07	0.00706	0.005183	1.31907	sDYSF(289)-sDYSF(258)/	Intra-Protein	1	1	15.5	12.5	1.58e-06	2.59e-08	2.1512	sDYSF	12	sDYSF	1	289	258	278	258	QLPGVNIKPVVKVTAAGQTKR	KLLSDKPQDFQIR
233	5	4840	DLAAMDKDSFSDPYAIVSFLHQSQK(7)-GKTQEETEDPSVIGEFK(2)	Cross-Linked	BS3	4840	null	3.49e-08	0.00718	0.004588	0.94709	sDYSF(1216)-sDYSF(1578)/	Intra-Protein	1	1	32.5	20.5	1.25e-10	4.04e-08	2.14388	sDYSF	7	sDYSF	2	1216	1578	1210	1577	DLAAMDKDSFSDPYAIVSFLHQSQK	GKTQEETEDPSVIGEFK
234	5	2180	GAHFCLKVFR(7)-VEKYLR(3)	Cross-Linked	BS3	2180	Carbamidomethyl[C](5)	4.16e-08	0.00722	-0.001293	-0.593341	sDYSF(431)-sDYSF(632)/	Intra-Protein	1	1	15.5	7.5	3.19e-11	2.63e-08	2.14146	sDYSF	7	sDYSF	3	431	632	425	630	GAHFCLKVFR	VEKYLR
235	5	2220	LDKTESKIPAR(7)-KDAFWR(1)	Cross-Linked	BS3	2220	null	2.54e-06	0.00729	-0.000415	-0.187173	sDYSF(1948)-sDYSF(1936)/	Intra-Protein	1	1	13.5	9.5	3.01e-06	8.42e-07	2.13727	sDYSF	7	sDYSF	1	1948	1936	1942	1936	LDKTESKIPAR	KDAFWR
236	5	4510	KDPSEDKEDIESNLLRPTGVALR(7)-KWLLLSDPDDFSAGAR(1)	Cross-Linked	BS3	4510	null	3.04e-12	0.00729	0.010344	2.29341	sDYSF(408)-sDYSF(366)/	Intra-Protein	1	1	21.5	25.5	2.04e-12	1.79e-22	2.13727	sDYSF	7	sDYSF	1	408	366	402	366	KDPSEDKEDIESNLLRPTGVALR	KWLLLSDPDDFSAGAR
237	4	3440	ITLYDYDLLSKDEK(11)-KLLSDKPQDFQIR(6)	Cross-Linked	BS3	3440	null	3.87e-08	0.00752	0.006391	1.85741	sDYSF(1702)-sDYSF(263)/	Intra-Protein	1	1	26	18	1.53e-08	1.63e-08	2.12378	sDYSF	11	sDYSF	6	1702	263	1692	258	ITLYDYDLLSKDEK	KLLSDKPQDFQIR
238	6	4360	FIFPFDYLPAEQVCTIAKK(18)-DAFWRLDKTESKIPAR(8)	Cross-Linked	BS3	4360	Carbamidomethyl[C](14)	1.92e-10	0.00779	-0.003038	-0.697225	sDYSF(1935)-sDYSF(1944)/	Intra-Protein	1	1	24	16	8.31e-12	3.47e-11	2.10846	sDYSF	18	sDYSF	8	1935	1944	1918	1937	FIFPFDYLPAEQVCTIAKK	DAFWRLDKTESKIPAR
239	3	3240	FIFPFDYLPAEQVCTIAKK(18)-LDKTESK(3)	Cross-Linked	BS3	3240	Carbamidomethyl[C](14)	1.87e-10	0.00782	0.004003	1.23371	sDYSF(1935)-sDYSF(1944)/	Intra-Protein	1	1	38	7	1.46e-15	1.36e-09	2.10679	sDYSF	18	sDYSF	3	1935	1944	1918	1942	FIFPFDYLPAEQVCTIAKK	LDKTESK
240	4	2960	GKTQEETEDPSVIGEFK(2)-VTAAGQTKR(8)	Cross-Linked	BS3	2960	null	0.000261	0.00808	0.000271	0.091477	sDYSF(1578)-sDYSF(297)/	Intra-Protein	1	1	25	8	2.43e-14	0.000442	2.09259	sDYSF	2	sDYSF	8	1578	297	1577	290	GKTQEETEDPSVIGEFK	VTAAGQTKR
241	5	4860	DLAAMDKDSFSDPYAIVSFLHQSQK(7)-GKTQEETEDPSVIGEFK(2)	Cross-Linked	BS3	4860	Oxidation[M](5)	8.72e-07	0.00812	0.01052	2.16447	sDYSF(1216)-sDYSF(1578)/	Intra-Protein	1	1	30.5	17.5	3.02e-08	1.89e-06	2.09044	sDYSF	7	sDYSF	2	1216	1578	1210	1577	DLAAMDKDSFSDPYAIVSFLHQSQK	GKTQEETEDPSVIGEFK
242	5	4560	VLPKDDIECPLGWKWEDEEWSTDLNR(14)-DLSQMEALKR(9)	Cross-Linked	BS3	4560	Carbamidomethyl[C](9)	0.000177	0.00815	0.001396	0.306262	sDYSF(1040)-sDYSF(1104)/	Intra-Protein	1	1	32.5	10.5	1.35e-11	0.00019	2.08884	sDYSF	14	sDYSF	9	1040	1104	1027	1096	VLPKDDIECPLGWKWEDEEWSTDLNR	DLSQMEALKR
243	5	2300	LDKTESKIPAR(3)-KRSAPTSR(1)	Cross-Linked	BS3	2300	null	1.62e-06	0.00845	0.00282	1.22753	sDYSF(1944)-sDYSF(250)/	Intra-Protein	1	1	26.5	7.5	7.44e-14	8.82e-06	2.07314	sDYSF	3	sDYSF	1	1944	250	1942	250	LDKTESKIPAR	KRSAPTSR
244	4	4680	EFTGFPDPYTELNTGKGEGVAYR(16)-LQTIFLKYPMEKVPGAR(12)	Cross-Linked	BS3	4680	null	5.49e-09	0.00852	0.000256	0.054743	sDYSF(593)-sDYSF(889)/	Intra-Protein	1	1	32.5	14.5	2.16e-12	2.85e-10	2.06956	sDYSF	16	sDYSF	12	593	889	578	878	EFTGFPDPYTELNTGKGEGVAYR	LQTIFLKYPMEKVPGAR
245	4	4120	DDIECPLGWKWEDEEWSTDLNR(10)-DLSQMEALKR(9)	Cross-Linked	BS3	4120	Carbamidomethyl[C](5)	1.3e-05	0.00857	-0.003771	-0.915094	sDYSF(1040)-sDYSF(1104)/	Intra-Protein	1	1	39	14	4.14e-16	2.06e-05	2.06702	sDYSF	10	sDYSF	9	1040	1104	1031	1096	DDIECPLGWKWEDEEWSTDLNR	DLSQMEALKR
246	4	3240	FIFPFDYLPAEQVCTIAKK(18)-LDKTESK(3)	Cross-Linked	BS3	3240	Carbamidomethyl[C](14)	4.9e-07	0.00892	-0.000298	-0.091843	sDYSF(1935)-sDYSF(1944)/	Intra-Protein	1	1	36.5	6.5	4.23e-14	1.26e-07	2.04964	sDYSF	18	sDYSF	3	1935	1944	1918	1942	FIFPFDYLPAEQVCTIAKK	LDKTESK
247	5	4420	GKTQEETEDPSVIGEFKGLFK(2)-EELYCPPITVKVIDNR(11)	Cross-Linked	BS3	4420	Carbamidomethyl[C](29)	0.000181	0.00945	0.000622	0.140653	sDYSF(1578)-sDYSF(1451)/	Intra-Protein	1	1	21	15	0.000303	0.000205	2.02457	sDYSF	2	sDYSF	11	1578	1451	1577	1441	GKTQEETEDPSVIGEFKGLFK	EELYCPPITVKVIDNR
248	6	4510	KDPSEDKEDIESNLLRPTGVALR(7)-KWLLLSDPDDFSAGAR(1)	Cross-Linked	BS3	4510	null	1.55e-10	0.00969	0.016359	3.62702	sDYSF(408)-sDYSF(366)/	Intra-Protein	1	1	19.5	21.5	3.04e-09	2.03e-15	2.01368	sDYSF	7	sDYSF	1	408	366	402	366	KDPSEDKEDIESNLLRPTGVALR	KWLLLSDPDDFSAGAR
249	5	4380	DPSEDKEDIESNLLRPTGVALR(6)-KWLLLSDPDDFSAGAR(1)	Cross-Linked	BS3	4380	null	2.8e-08	0.00999	0.013792	3.14727	sDYSF(408)-sDYSF(366)/	Intra-Protein	1	1	18.5	25.5	3.6e-09	2.11e-15	2.00043	sDYSF	6	sDYSF	1	408	366	403	366	DPSEDKEDIESNLLRPTGVALR	KWLLLSDPDDFSAGAR
250	4	2790	EKCGSYLEKDFDTLK(2)-LDKTESK(3)	Cross-Linked	BS3	2790	Carbamidomethyl[C](3)	0.000344	0.0101	0.006537	2.3427	sDYSF(1537)-sDYSF(1944)/	Intra-Protein	1	1	23.5	7.5	8.79e-08	0.000835	1.99568	sDYSF	2	sDYSF	3	1537	1944	1536	1942	EKCGSYLEKDFDTLK	LDKTESK
251	6	4370	VMFQDKEYSIEEIEAGRIPNPHLGPVEER(6)-VKAPVYR(2)	Cross-Linked	BS3	4370	Oxidation[M](2)	1.59e-05	0.0104	-0.003126	-0.715621	sDYSF(1773)-sDYSF(1759)/	Intra-Protein	1	1	46	10	3.88e-18	8.51e-06	1.98297	sDYSF	6	sDYSF	2	1773	1759	1768	1758	VMFQDKEYSIEEIEAGRIPNPHLGPVEER	VKAPVYR
252	3	2260	DPNGKCDPYIK(5)-LDKTESK(3)	Cross-Linked	BS3	2260	Carbamidomethyl[C](6)	5.99e-06	0.0109	0.00217	0.958433	sDYSF(1645)-sDYSF(1944)/	Intra-Protein	1	1	14.5	7.5	5.03e-12	4.65e-05	1.96257	sDYSF	5	sDYSF	3	1645	1944	1641	1942	DPNGKCDPYIK	LDKTESK
253	3	3400	EKPAIHHIPGFEVQETSR(2)-DLSQMEALKR(9)	Cross-Linked	BS3	3400	null	4.51e-13	0.011	0.002323	0.682684	sDYSF(1328)-sDYSF(1104)/	Intra-Protein	1	1	33.5	9.5	2.23e-20	2.5e-14	1.95861	sDYSF	2	sDYSF	9	1328	1104	1327	1096	EKPAIHHIPGFEVQETSR	DLSQMEALKR
254	4	3110	KLPSRPPPHYPGIKR(14)-GANYCGKNCGK(7)	Cross-Linked	BS3	3110	Carbamidomethyl[C](23);Carbamidomethyl[C](27)	4.99e-11	0.0112	-0.000197	-0.063373	sDYSF(248)-sDYSF(873)/	Intra-Protein	1	1	19.5	13.5	1.92e-16	4.06e-13	1.95078	sDYSF	14	sDYSF	7	248	873	235	867	KLPSRPPPHYPGIKR	GANYCGKNCGK
255	5	4690	EFTGFPDPYTELNTGKGEGVAYR(16)-LQTIFLKYPMEKVPGAR(12)	Cross-Linked	BS3	4690	Oxidation[M](36)	9.42e-08	0.0113	0.00497	1.05917	sDYSF(593)-sDYSF(889)/	Intra-Protein	1	1	35.5	16.5	1.5e-11	8.35e-08	1.94692	sDYSF	16	sDYSF	12	593	889	578	878	EFTGFPDPYTELNTGKGEGVAYR	LQTIFLKYPMEKVPGAR
256	3	4410	LYRGKTQEETEDPSVIGEFK(5)-EELYCPPITVKVIDNR(11)	Cross-Linked	BS3	4410	Carbamidomethyl[C](28)	3.97e-05	0.0115	-0.001058	-0.239952	sDYSF(1578)-sDYSF(1451)/	Intra-Protein	1	1	13	16	1.27e-07	6.09e-08	1.9393	sDYSF	5	sDYSF	11	1578	1451	1574	1441	LYRGKTQEETEDPSVIGEFK	EELYCPPITVKVIDNR
257	4	4140	DDIECPLGWKWEDEEWSTDLNR(10)-DLSQMEALKR(9)	Cross-Linked	BS3	4140	Carbamidomethyl[C](5);Oxidation[M](30)	1.9e-06	0.0117	-0.011258	-2.72137	sDYSF(1040)-sDYSF(1104)/	Intra-Protein	1	1	40	21	2.54e-19	1.16e-05	1.93181	sDYSF	10	sDYSF	9	1040	1104	1031	1096	DDIECPLGWKWEDEEWSTDLNR	DLSQMEALKR
258	6	7240	ISAPGGEIEEEPAGAVKPSKASDLDDYLGFLPTFGPCYINLYGSPR(20)-QLPGVNIKPVVKVTAAGQTKR(12)	Cross-Linked	BS3	7240	Carbamidomethyl[C](37)	6.83e-06	0.0118	-0.017083	-2.35961	sDYSF(551)-sDYSF(289)/	Intra-Protein	1	1	37.5	17.5	8.41e-10	1.65e-07	1.92812	sDYSF	20	sDYSF	12	551	289	532	278	ISAPGGEIEEEPAGAVKPSKASDLDDYLGFLPTFGPCYINLYGSPR	QLPGVNIKPVVKVTAAGQTKR
259	6	2530	RRDLSQMEALKR(11)-KTDAFRR(1)	Cross-Linked	BS3	2530	null	1.52e-10	0.012	0.00115	0.453939	sDYSF(1104)-sDYSF(1132)/	Intra-Protein	1	1	15.5	10.5	7.63e-11	7.41e-13	1.92082	sDYSF	11	sDYSF	1	1104	1132	1094	1132	RRDLSQMEALKR	KTDAFRR
260	4	2220	DLSQMEALKR(9)-KTDAFRR(1)	Cross-Linked	BS3	2220	null	4.29e-21	0.0127	0.000964	0.434004	sDYSF(1104)-sDYSF(1132)/	Intra-Protein	1	1	16.5	9.5	2.66e-15	3.06e-21	1.8962	sDYSF	9	sDYSF	1	1104	1132	1096	1132	DLSQMEALKR	KTDAFRR
261	4	3320	GKTQEETEDPSVIGEFK(2)-QLPGVNIKPVVK(8)	Cross-Linked	BS3	3320	null	7.95e-07	0.0127	0.006688	2.01277	sDYSF(1578)-sDYSF(285)/	Intra-Protein	1	1	19.5	18.5	1.44e-10	9.35e-07	1.8962	sDYSF	2	sDYSF	8	1578	285	1577	278	GKTQEETEDPSVIGEFK	QLPGVNIKPVVK
262	4	4060	QLPGVNIKPVVKVTAAGQTKR(12)-ITLYDYDLLSKDEK(11)	Cross-Linked	BS3	4060	null	4.18e-10	0.0132	0.009824	2.42134	sDYSF(289)-sDYSF(1702)/	Intra-Protein	1	1	27	22	5.98e-10	2e-09	1.87943	sDYSF	12	sDYSF	11	289	1702	278	1692	QLPGVNIKPVVKVTAAGQTKR	ITLYDYDLLSKDEK
263	5	2930	GKTQEETEDPSVIGEFK(2)-KRSAPTSR(1)	Cross-Linked	BS3	2930	null	6.97e-06	0.0134	-0.000452	-0.154083	sDYSF(1578)-sDYSF(250)/	Intra-Protein	1	1	32	7	2.83e-17	1.78e-05	1.8729	sDYSF	2	sDYSF	1	1578	250	1577	250	GKTQEETEDPSVIGEFK	KRSAPTSR
264	4	1860	TESKIPAR(4)-KDAFWR(1)	Cross-Linked	BS3	1860	null	1.58e-10	0.0135	0.001756	0.94358	sDYSF(1948)-sDYSF(1936)/	Intra-Protein	1	1	12.5	7.5	2.97e-10	9.1e-08	1.86967	sDYSF	4	sDYSF	1	1948	1936	1945	1936	TESKIPAR	KDAFWR
265	6	4720	TDRVMFQDKEYSIEEIEAGRIPNPHLGPVEER(9)-VKAPVYR(2)	Cross-Linked	BS3	4720	null	1.77e-05	0.0136	-0.00089	-0.188383	sDYSF(1773)-sDYSF(1759)/	Intra-Protein	1	1	50.5	8.5	1.37e-16	1.91e-05	1.86646	sDYSF	9	sDYSF	2	1773	1759	1765	1758	TDRVMFQDKEYSIEEIEAGRIPNPHLGPVEER	VKAPVYR
266	4	2360	QLPGVNIKPVVK(8)-VTAAGQTKR(8)	Cross-Linked	BS3	2360	null	5.83e-07	0.0141	0.001636	0.693102	sDYSF(285)-sDYSF(297)/	Intra-Protein	1	1	12.5	8.5	6.17e-07	3.42e-06	1.85078	sDYSF	8	sDYSF	8	285	297	278	290	QLPGVNIKPVVK	VTAAGQTKR
267	5	3420	EKPAIHHIPGFEVQETSR(2)-DLSQMEALKR(9)	Cross-Linked	BS3	3420	Oxidation[M](26)	1.75e-05	0.0144	-0.003285	-0.96088	sDYSF(1328)-sDYSF(1104)/	Intra-Protein	1	1	31.5	17.5	9.93e-17	1.29e-05	1.84164	sDYSF	2	sDYSF	9	1328	1104	1327	1096	EKPAIHHIPGFEVQETSR	DLSQMEALKR
268	4	2860	GKTQEETEDPSVIGEFK(2)-VKAPVYR(2)	Cross-Linked	BS3	2860	null	2.29e-06	0.0151	0.004071	1.4217	sDYSF(1578)-sDYSF(1759)/	Intra-Protein	1	1	20	7	4.32e-09	2.92e-06	1.82102	sDYSF	2	sDYSF	2	1578	1759	1577	1758	GKTQEETEDPSVIGEFK	VKAPVYR
269	5	4070	HRQAEAEGEGWEYASLFGWKFHLEYR(20)-KTDAFR(1)	Cross-Linked	BS3	4070	null	2.07e-05	0.0151	0.002355	0.578488	sDYSF(1125)-sDYSF(1132)/	Intra-Protein	1	1	47.5	4.5	3.03e-13	4.42e-05	1.82102	sDYSF	20	sDYSF	1	1125	1132	1106	1132	HRQAEAEGEGWEYASLFGWKFHLEYR	KTDAFR
270	4	4610	KDPSEDKEDIESNLLRPTGVALR(1)-GKTQEETEDPSVIGEFK(2)	Cross-Linked	BS3	4610	null	2.16e-11	0.0155	0.001159	0.25123	sDYSF(402)-sDYSF(1578)/	Intra-Protein	1	1	15	32	8.03e-09	1.48e-15	1.80967	sDYSF	1	sDYSF	2	402	1578	402	1577	KDPSEDKEDIESNLLRPTGVALR	GKTQEETEDPSVIGEFK
271	4	4010	ITLYDYDLLSKDEKIGETVVDLENR(14)-VTAAGQTKR(8)	Cross-Linked	BS3	4010	null	2.37e-07	0.0156	0.002018	0.50323	sDYSF(1705)-sDYSF(297)/	Intra-Protein	1	1	57.5	17.5	1.23e-19	2.12e-07	1.80688	sDYSF	14	sDYSF	8	1705	297	1692	290	ITLYDYDLLSKDEKIGETVVDLENR	VTAAGQTKR
272	4	2830	CDPYIKISIGKK(6)-AFGLQPKDPNGK(7)	Cross-Linked	BS3	2830	Carbamidomethyl[C](1)	1.85e-06	0.0157	0.000806	0.284754	sDYSF(1651)-sDYSF(1640)/	Intra-Protein	1	1	14.5	19.5	2.88e-08	4.04e-05	1.8041	sDYSF	6	sDYSF	7	1651	1640	1646	1634	CDPYIKISIGKK	AFGLQPKDPNGK
273	3	2260	DPNGKCDPYIK(5)-LDKTESK(3)	Cross-Linked	BS3	2260	Carbamidomethyl[C](6)	1.14e-08	0.0157	0.00217	0.958433	sDYSF(1645)-sDYSF(1944)/	Intra-Protein	1	1	18	8	2.05e-11	1.96e-07	1.8041	sDYSF	5	sDYSF	3	1645	1944	1641	1942	DPNGKCDPYIK	LDKTESK
274	4	2910	ISAPGGEIEEEPAGAVKPSK(17)-VEKYLR(3)	Cross-Linked	BS3	2910	null	2.03e-09	0.0166	0.002363	0.811875	sDYSF(548)-sDYSF(632)/	Intra-Protein	1	1	33.5	6.5	7.3e-18	4.25e-10	1.77989	sDYSF	17	sDYSF	3	548	632	532	630	ISAPGGEIEEEPAGAVKPSK	VEKYLR
275	5	4610	KDPSEDKEDIESNLLRPTGVALR(1)-GKTQEETEDPSVIGEFK(2)	Cross-Linked	BS3	4610	null	1.53e-08	0.017	0.002902	0.629049	sDYSF(402)-sDYSF(1578)/	Intra-Protein	1	1	19	26	3.09e-08	2.4e-17	1.76955	sDYSF	1	sDYSF	2	402	1578	402	1577	KDPSEDKEDIESNLLRPTGVALR	GKTQEETEDPSVIGEFK
276	5	4260	FIFPFDYLPAEQVCTIAKK(18)-EKCGSYLEKDFDTLK(2)	Cross-Linked	BS3	4260	Carbamidomethyl[C](14);Carbamidomethyl[C](25)	2.69e-05	0.0172	0.005352	1.25719	sDYSF(1935)-sDYSF(1537)/	Intra-Protein	1	1	19.5	15.5	1.12e-07	7.64e-05	1.76447	sDYSF	18	sDYSF	2	1935	1537	1918	1536	FIFPFDYLPAEQVCTIAKK	EKCGSYLEKDFDTLK
277	3	3730	FIFPFDYLPAEQVCTIAKK(18)-DPNGKCDPYIK(5)	Cross-Linked	BS3	3730	Carbamidomethyl[C](14);Carbamidomethyl[C](28)	6.62e-07	0.0173	-0.000311	-0.083359	sDYSF(1935)-sDYSF(1645)/	Intra-Protein	1	1	28.5	9.5	3.04e-13	8.53e-07	1.76195	sDYSF	18	sDYSF	5	1935	1645	1918	1641	FIFPFDYLPAEQVCTIAKK	DPNGKCDPYIK
278	4	2510	LDKTESKIPAR(3)-EKCGSYLEK(2)	Cross-Linked	BS3	2510	Carbamidomethyl[C](17)	9.66e-10	0.0173	-0.000301	-0.120002	sDYSF(1944)-sDYSF(1537)/	Intra-Protein	1	1	21	12	8.05e-10	1.67e-08	1.76195	sDYSF	3	sDYSF	2	1944	1537	1942	1536	LDKTESKIPAR	EKCGSYLEK
279	4	2710	KLPSRPPPHYPGIKR(1)-VKAPVYR(2)	Cross-Linked	BS3	2710	null	1.2e-10	0.0179	-0.002447	-0.902092	sDYSF(235)-sDYSF(1759)/	Intra-Protein	1	1	27	14	2.21e-09	1.96e-11	1.74715	sDYSF	1	sDYSF	2	235	1759	235	1758	KLPSRPPPHYPGIKR	VKAPVYR
280	4	4310	QLPGVNIKPVVKVTAAGQTKR(12)-ISAPGGEIEEEPAGAVKPSK(17)	Cross-Linked	BS3	4310	null	3.8e-09	0.0183	-0.005171	-1.20049	sDYSF(289)-sDYSF(548)/	Intra-Protein	1	1	20	33	1.79e-07	1.25e-08	1.73755	sDYSF	12	sDYSF	17	289	548	278	532	QLPGVNIKPVVKVTAAGQTKR	ISAPGGEIEEEPAGAVKPSK
281	5	2530	RRDLSQMEALKR(11)-KTDAFRR(1)	Cross-Linked	BS3	2530	null	6.6e-09	0.0184	-0.000523	-0.206444	sDYSF(1104)-sDYSF(1132)/	Intra-Protein	1	1	16.5	10.5	1.89e-10	1.43e-19	1.73518	sDYSF	11	sDYSF	1	1104	1132	1094	1132	RRDLSQMEALKR	KTDAFRR
282	4	2910	ISAPGGEIEEEPAGAVKPSK(17)-VEKYLR(3)	Cross-Linked	BS3	2910	null	5.34e-06	0.0184	0.002124	0.72976	sDYSF(548)-sDYSF(632)/	Intra-Protein	1	1	37.5	6.5	5.92e-16	1.03e-05	1.73518	sDYSF	17	sDYSF	3	548	632	532	630	ISAPGGEIEEEPAGAVKPSK	VEKYLR
283	5	3950	KCSLDQLDDAFHPEWFVSLFEQK(1)-MPKPAKTAK(6)	Cross-Linked	BS3	3950	Carbamidomethyl[C](2)	0.000286	0.0185	-0.001919	-0.486072	sDYSF(1988)-sDYSF(1984)/	Intra-Protein	1	1	40.5	8.5	3.73e-20	0.000349	1.73283	sDYSF	1	sDYSF	6	1988	1984	1988	1979	KCSLDQLDDAFHPEWFVSLFEQK	MPKPAKTAK
284	3	2960	GKTQEETEDPSVIGEFK(2)-VTAAGQTKR(8)	Cross-Linked	BS3	2960	null	5.54e-06	0.0185	0.000255	0.086076	sDYSF(1578)-sDYSF(297)/	Intra-Protein	1	1	23	11	3.4e-12	2.72e-06	1.73283	sDYSF	2	sDYSF	8	1578	297	1577	290	GKTQEETEDPSVIGEFK	VTAAGQTKR
285	5	5340	VYDTQLENVEAFEGLSDFCNTFKLYR(23)-QLPGVNIKPVVKVTAAGQTK(12)	Cross-Linked	BS3	5340	Carbamidomethyl[C](19)	4.09e-05	0.0201	0.005723	1.07097	sDYSF(1573)-sDYSF(289)/	Intra-Protein	1	1	28	14	4.03e-11	2.84e-05	1.6968	sDYSF	23	sDYSF	12	1573	289	1551	278	VYDTQLENVEAFEGLSDFCNTFKLYR	QLPGVNIKPVVKVTAAGQTK
286	5	2910	ISAPGGEIEEEPAGAVKPSK(17)-VEKYLR(3)	Cross-Linked	BS3	2910	null	7.59e-06	0.0203	0.001715	0.589237	sDYSF(548)-sDYSF(632)/	Intra-Protein	1	1	31.5	5.5	6.87e-13	3.13e-06	1.6925	sDYSF	17	sDYSF	3	548	632	532	630	ISAPGGEIEEEPAGAVKPSK	VEKYLR
287	4	1860	KTDAFRR(1)-VKAPVYR(2)	Cross-Linked	BS3	1860	null	8.21e-06	0.0204	-0.000521	-0.279647	sDYSF(1132)-sDYSF(1759)/	Intra-Protein	1	1	9.5	11.5	8.02e-06	1.32e-07	1.69037	sDYSF	1	sDYSF	2	1132	1759	1132	1758	KTDAFRR	VKAPVYR
288	5	4020	KSVSDQDNYIPCTLEPVFGK(1)-KLLSDKPQDFQIR(6)	Cross-Linked	BS3	4020	Carbamidomethyl[C](12)	9.37e-08	0.0207	0.006549	1.62827	sDYSF(1657)-sDYSF(263)/	Intra-Protein	1	1	29	12	5.98e-11	8.68e-08	1.68403	sDYSF	1	sDYSF	6	1657	263	1657	258	KSVSDQDNYIPCTLEPVFGK	KLLSDKPQDFQIR
289	6	3310	KLPSRPPPHYPGIK(1)-KLLSDKPQDFQIR(1)	Cross-Linked	BS3	3310	null	5.26e-06	0.0215	0.002367	0.714704	sDYSF(235)-sDYSF(258)/	Intra-Protein	1	1	9	12	5.59e-06	7.04e-10	1.66756	sDYSF	1	sDYSF	1	235	258	235	258	KLPSRPPPHYPGIK	KLLSDKPQDFQIR
290	6	3670	KWLLLSDPDDFSAGAR(1)-KLPSRPPPHYPGIKR(1)	Cross-Linked	BS3	3670	null	0.000612	0.0217	0.002524	0.687554	sDYSF(366)-sDYSF(235)/	Intra-Protein	1	1	21.5	9.5	1.35e-13	0.000935	1.66354	sDYSF	1	sDYSF	1	366	235	366	235	KWLLLSDPDDFSAGAR	KLPSRPPPHYPGIKR
291	6	4890	KDPSEDKEDIESNLLRPTGVALR(1)-GYLKTSLCVLGPGDEAPLER(4)	Cross-Linked	BS3	4890	Carbamidomethyl[C](34)	1.41e-05	0.0232	0.003195	0.652772	sDYSF(402)-sDYSF(385)/	Intra-Protein	1	1	14.5	27.5	2.42e-05	2.41e-21	1.63451	sDYSF	1	sDYSF	4	402	385	402	382	KDPSEDKEDIESNLLRPTGVALR	GYLKTSLCVLGPGDEAPLER
292	5	6640	NMKSYQLANISSPSLVVECGGQTVQSCVIR(3)-VYDTQLENVEAFEGLSDFCNTFKLYR(23)	Cross-Linked	BS3	6640	Carbamidomethyl[C](19);Carbamidomethyl[C](27);Oxidation[M](2);Carbamidomethyl[C](52)	3.52e-07	0.0233	-0.00379	-0.571027	sDYSF(1392)-sDYSF(1573)/	Intra-Protein	1	1	26.5	24.5	2.39e-12	4.93e-07	1.63264	sDYSF	3	sDYSF	23	1392	1573	1390	1551	NMKSYQLANISSPSLVVECGGQTVQSCVIR	VYDTQLENVEAFEGLSDFCNTFKLYR
293	5	4230	HRQAEAEGEGWEYASLFGWKFHLEYR(20)-KTDAFRR(1)	Cross-Linked	BS3	4230	null	6.33e-05	0.0235	-0.000852	-0.201559	sDYSF(1125)-sDYSF(1132)/	Intra-Protein	1	1	51.5	4.5	1.8e-19	0.000154	1.62893	sDYSF	20	sDYSF	1	1125	1132	1106	1132	HRQAEAEGEGWEYASLFGWKFHLEYR	KTDAFRR
294	4	2270	DPNGKCDPYIK(5)-KDAFWR(1)	Cross-Linked	BS3	2270	Carbamidomethyl[C](6)	8.83e-07	0.0239	0.000208	0.091788	sDYSF(1645)-sDYSF(1936)/	Intra-Protein	1	1	14	9	1.18e-06	8.41e-07	1.6216	sDYSF	5	sDYSF	1	1645	1936	1641	1936	DPNGKCDPYIK	KDAFWR
295	6	4770	EFTGFPDPYTELNTGKGEGVAYR(16)-GRLLLSLETKLVEHSEQK(10)	Cross-Linked	BS3	4770	null	2.22e-05	0.0242	0.012675	2.65978	sDYSF(593)-sDYSF(610)/	Intra-Protein	1	1	27	9	1.66e-07	3.19e-05	1.61618	sDYSF	16	sDYSF	10	593	610	578	601	EFTGFPDPYTELNTGKGEGVAYR	GRLLLSLETKLVEHSEQK
296	4	3410	GKTQEETEDPSVIGEFKGLFK(2)-VTAAGQTKR(8)	Cross-Linked	BS3	3410	null	0.00568	0.0244	0.000581	0.170493	sDYSF(1578)-sDYSF(297)/	Intra-Protein	1	1	29	11	2.86e-07	0.0099	1.61261	sDYSF	2	sDYSF	8	1578	297	1577	290	GKTQEETEDPSVIGEFKGLFK	VTAAGQTKR
297	5	2560	KLLSDKPQDFQIR(1)-VKAPVYR(2)	Cross-Linked	BS3	2560	null	0.00132	0.025	0.000439	0.171655	sDYSF(258)-sDYSF(1759)/	Intra-Protein	1	1	12.5	7.5	0.000263	0.0026	1.60206	sDYSF	1	sDYSF	2	258	1759	258	1758	KLLSDKPQDFQIR	VKAPVYR
298	7	7240	ISAPGGEIEEEPAGAVKPSKASDLDDYLGFLPTFGPCYINLYGSPR(17)-QLPGVNIKPVVKVTAAGQTKR(12)	Cross-Linked	BS3	7240	Carbamidomethyl[C](37)	2.36e-06	0.0254	-0.002713	-0.374736	sDYSF(548)-sDYSF(289)/	Intra-Protein	1	1	38.5	19.5	4.33e-11	3.28e-07	1.59517	sDYSF	17	sDYSF	12	548	289	532	278	ISAPGGEIEEEPAGAVKPSKASDLDDYLGFLPTFGPCYINLYGSPR	QLPGVNIKPVVKVTAAGQTKR
299	3	3230	TVKGWWPCVAEEGEK(3)-DEPNMNPKLED(8)	Cross-Linked	BS3	3230	Carbamidomethyl[C](8);Oxidation[M](23)	3.88e-07	0.027	0.00091	0.281693	sDYSF(2013)-sDYSF(2061)/	Intra-Protein	1	1	25	16	7.18e-14	3.89e-07	1.56864	sDYSF	3	sDYSF	8	2013	2061	2011	2054	TVKGWWPCVAEEGEK	DEPNMNPKLED
300	4	2180	GAHFCLKVFR(7)-VEKYLR(3)	Cross-Linked	BS3	2180	Carbamidomethyl[C](5)	1.38e-05	0.0285	0.000442	0.202828	sDYSF(431)-sDYSF(632)/	Intra-Protein	1	1	17.5	6.5	5.59e-07	2.02e-05	1.54516	sDYSF	7	sDYSF	3	431	632	425	630	GAHFCLKVFR	VEKYLR
301	5	2630	KLLSDKPQDFQIR(1)-KRSAPTSR(1)	Cross-Linked	BS3	2630	null	5.32e-05	0.0292	-0.001124	-0.427789	sDYSF(258)-sDYSF(250)/	Intra-Protein	1	1	11.5	7.5	7.13e-06	5.94e-05	1.53462	sDYSF	1	sDYSF	1	258	250	258	250	KLLSDKPQDFQIR	KRSAPTSR
302	3	2370	KLLSDKPQDFQIR(6)-ISIGKK(5)	Cross-Linked	BS3	2370	null	0.000421	0.0297	-0.001342	-0.566155	sDYSF(263)-sDYSF(1656)/	Intra-Protein	1	1	23	7	4.05e-09	0.00142	1.52724	sDYSF	6	sDYSF	5	263	1656	258	1652	KLLSDKPQDFQIR	ISIGKK
303	3	1860	TESKIPAR(4)-KDAFWR(1)	Cross-Linked	BS3	1860	null	2.07e-06	0.0301	0.001409	0.757121	sDYSF(1948)-sDYSF(1936)/	Intra-Protein	1	1	15.5	8.5	1.76e-09	3.33e-06	1.52143	sDYSF	4	sDYSF	1	1948	1936	1945	1936	TESKIPAR	KDAFWR
304	5	4060	QLPGVNIKPVVKVTAAGQTKR(12)-ITLYDYDLLSKDEK(11)	Cross-Linked	BS3	4060	null	1.22e-06	0.0324	0.007172	1.7677	sDYSF(289)-sDYSF(1702)/	Intra-Protein	1	1	23	17	3.05e-06	1.76e-06	1.48945	sDYSF	12	sDYSF	11	289	1702	278	1692	QLPGVNIKPVVKVTAAGQTKR	ITLYDYDLLSKDEK
305	5	5370	NMKSYQLANISSPSLVVECGGQTVQSCVIR(3)-GKTQEETEDPSVIGEFK(2)	Cross-Linked	BS3	5370	Carbamidomethyl[C](19);Carbamidomethyl[C](27);Oxidation[M](2)	2.43e-11	0.0325	0.003257	0.606225	sDYSF(1392)-sDYSF(1578)/	Intra-Protein	1	1	42	18	4.22e-21	5.9e-10	1.48812	sDYSF	3	sDYSF	2	1392	1578	1390	1577	NMKSYQLANISSPSLVVECGGQTVQSCVIR	GKTQEETEDPSVIGEFK
306	4	3980	GKTQEETEDPSVIGEFK(2)-EELYCPPITVKVIDNR(11)	Cross-Linked	BS3	3980	Carbamidomethyl[C](25)	1.9e-07	0.0329	0.001483	0.372897	sDYSF(1578)-sDYSF(1451)/	Intra-Protein	1	1	12	22	5.8e-07	4.07e-09	1.4828	sDYSF	2	sDYSF	11	1578	1451	1577	1441	GKTQEETEDPSVIGEFK	EELYCPPITVKVIDNR
307	4	2340	GAHFCLKVFR(7)-VEKYLRR(3)	Cross-Linked	BS3	2340	Carbamidomethyl[C](5)	4.09e-09	0.0331	-0.000108	-0.046247	sDYSF(431)-sDYSF(632)/	Intra-Protein	1	1	21	8	1.58e-10	2.43e-08	1.48017	sDYSF	7	sDYSF	3	431	632	425	630	GAHFCLKVFR	VEKYLRR
308	5	4510	KDPSEDKEDIESNLLRPTGVALR(1)-KWLLLSDPDDFSAGAR(1)	Cross-Linked	BS3	4510	null	2.49e-10	0.0349	0.009265	2.05418	sDYSF(402)-sDYSF(366)/	Intra-Protein	1	1	15.5	24.5	9.19e-10	1.2e-20	1.45717	sDYSF	1	sDYSF	1	402	366	402	366	KDPSEDKEDIESNLLRPTGVALR	KWLLLSDPDDFSAGAR
309	5	3400	EKPAIHHIPGFEVQETSR(2)-DLSQMEALKR(9)	Cross-Linked	BS3	3400	null	4.2e-05	0.0353	0.004264	1.2531	sDYSF(1328)-sDYSF(1104)/	Intra-Protein	1	1	31.5	13.5	4.5e-13	0.000127	1.45223	sDYSF	2	sDYSF	9	1328	1104	1327	1096	EKPAIHHIPGFEVQETSR	DLSQMEALKR
310	4	2660	KLLSDKPQDFQIR(1)-VTAAGQTKR(8)	Cross-Linked	BS3	2660	null	1.44e-05	0.0356	0.001554	0.584985	sDYSF(258)-sDYSF(297)/	Intra-Protein	1	1	17.5	13.5	7.15e-11	0.000133	1.44855	sDYSF	1	sDYSF	8	258	297	258	290	KLLSDKPQDFQIR	VTAAGQTKR
311	4	3180	GLFKIYPLPEDPAIPMPPR(4)-LLSKFGAR(4)	Cross-Linked	BS3	3180	null	0.000138	0.0379	0.007665	2.41055	sDYSF(1597)-sDYSF(1720)/	Intra-Protein	1	1	28	7	5.05e-11	0.000287	1.42136	sDYSF	4	sDYSF	4	1597	1720	1594	1717	GLFKIYPLPEDPAIPMPPR	LLSKFGAR
312	5	2630	KLLSDKPQDFQIR(1)-KRSAPTSR(1)	Cross-Linked	BS3	2630	null	1.19e-08	0.038	-0.000387	-0.14729	sDYSF(258)-sDYSF(250)/	Intra-Protein	1	1	19.5	6.5	5.25e-14	4.96e-08	1.42022	sDYSF	1	sDYSF	1	258	250	258	250	KLLSDKPQDFQIR	KRSAPTSR
313	5	2560	KLPSRPPPHYPGIK(1)-VKAPVYR(2)	Cross-Linked	BS3	2560	null	9.88e-08	0.0382	0.000676	0.264426	sDYSF(235)-sDYSF(1759)/	Intra-Protein	1	1	18.5	9.5	1.56e-07	4.7e-07	1.41794	sDYSF	1	sDYSF	2	235	1759	235	1758	KLPSRPPPHYPGIK	VKAPVYR
314	4	2370	KLLSDKPQDFQIR(6)-ISIGKK(5)	Cross-Linked	BS3	2370	null	9.63e-06	0.0383	0.000882	0.372093	sDYSF(263)-sDYSF(1656)/	Intra-Protein	1	1	24	10	8.4e-16	1.49e-06	1.4168	sDYSF	6	sDYSF	5	263	1656	258	1652	KLLSDKPQDFQIR	ISIGKK
315	4	3540	FIFPFDYLPAEQVCTIAKK(18)-EKCGSYLEK(2)	Cross-Linked	BS3	3540	Carbamidomethyl[C](14);Carbamidomethyl[C](25)	0.000221	0.0394	-0.000638	-0.18034	sDYSF(1935)-sDYSF(1537)/	Intra-Protein	1	1	30.5	8.5	8.91e-08	0.000386	1.4045	sDYSF	18	sDYSF	2	1935	1537	1918	1536	FIFPFDYLPAEQVCTIAKK	EKCGSYLEK
316	6	4510	KDPSEDKEDIESNLLRPTGVALR(1)-KWLLLSDPDDFSAGAR(1)	Cross-Linked	BS3	4510	null	4.37e-09	0.0395	0.01137	2.52089	sDYSF(402)-sDYSF(366)/	Intra-Protein	1	1	16.5	24.5	7.46e-09	4.49e-16	1.4034	sDYSF	1	sDYSF	1	402	366	402	366	KDPSEDKEDIESNLLRPTGVALR	KWLLLSDPDDFSAGAR
317	5	2910	ISAPGGEIEEEPAGAVKPSK(17)-VEKYLR(3)	Cross-Linked	BS3	2910	null	1.54e-05	0.0397	0.001715	0.589237	sDYSF(548)-sDYSF(632)/	Intra-Protein	1	1	33.5	4.5	3.58e-14	2.46e-06	1.40121	sDYSF	17	sDYSF	3	548	632	532	630	ISAPGGEIEEEPAGAVKPSK	VEKYLR
318	3	2910	ISAPGGEIEEEPAGAVKPSK(17)-VEKYLR(3)	Cross-Linked	BS3	2910	null	3.41e-07	0.0404	0.001047	0.359726	sDYSF(548)-sDYSF(632)/	Intra-Protein	1	1	43.5	5.5	6.41e-16	3.52e-07	1.39362	sDYSF	17	sDYSF	3	548	632	532	630	ISAPGGEIEEEPAGAVKPSK	VEKYLR
319	6	5480	EFTGFPDPYTELNTGKGEGVAYRGR(16)-KDPSEDKEDIESNLLRPTGVALR(7)	Cross-Linked	BS3	5480	null	1.23e-06	0.0421	0.008463	1.54414	sDYSF(593)-sDYSF(408)/	Intra-Protein	1	1	23.5	21.5	2.29e-07	3.07e-06	1.37572	sDYSF	16	sDYSF	7	593	408	578	402	EFTGFPDPYTELNTGKGEGVAYRGR	KDPSEDKEDIESNLLRPTGVALR
320	6	5270	KDPSEDKEDIESNLLRPTGVALR(7)-EFTGFPDPYTELNTGKGEGVAYR(16)	Cross-Linked	BS3	5270	null	0.000641	0.0435	-0.001068	-0.202749	sDYSF(408)-sDYSF(593)/	Intra-Protein	1	1	14.5	20.5	0.00137	1.26e-08	1.36151	sDYSF	7	sDYSF	16	408	593	402	578	KDPSEDKEDIESNLLRPTGVALR	EFTGFPDPYTELNTGKGEGVAYR
321	4	3730	FIFPFDYLPAEQVCTIAKK(18)-DPNGKCDPYIK(5)	Cross-Linked	BS3	3730	Carbamidomethyl[C](14);Carbamidomethyl[C](28)	6.9e-06	0.0439	0.000153	0.041009	sDYSF(1935)-sDYSF(1645)/	Intra-Protein	1	1	17.5	10.5	2.42e-08	1.83e-05	1.35754	sDYSF	18	sDYSF	5	1935	1645	1918	1641	FIFPFDYLPAEQVCTIAKK	DPNGKCDPYIK
322	5	4950	DFDTLKVYDTQLENVEAFEGLSDFCNTFKLYR(29)-VTAAGQTKR(8)	Cross-Linked	BS3	4950	Carbamidomethyl[C](25)	0.000411	0.044	0.008778	1.77462	sDYSF(1573)-sDYSF(297)/	Intra-Protein	1	1	38.5	7.5	1.02e-14	0.000269	1.35655	sDYSF	29	sDYSF	8	1573	297	1545	290	DFDTLKVYDTQLENVEAFEGLSDFCNTFKLYR	VTAAGQTKR
323	4	4510	KDPSEDKEDIESNLLRPTGVALR(7)-KWLLLSDPDDFSAGAR(1)	Cross-Linked	BS3	4510	null	9.16e-05	0.0455	0.005152	1.14227	sDYSF(408)-sDYSF(366)/	Intra-Protein	1	1	20.5	12.5	5.48e-05	0.000111	1.34199	sDYSF	7	sDYSF	1	408	366	402	366	KDPSEDKEDIESNLLRPTGVALR	KWLLLSDPDDFSAGAR
324	4	3500	EFTGFPDPYTELNTGKGEGVAYR(16)-KDPSEDK(1)	Cross-Linked	BS3	3500	null	0.00147	0.046	-0.001973	-0.563127	sDYSF(593)-sDYSF(402)/	Intra-Protein	1	1	38	7	2.11e-14	0.00226	1.33724	sDYSF	16	sDYSF	1	593	402	578	402	EFTGFPDPYTELNTGKGEGVAYR	KDPSEDK
325	5	4770	EFTGFPDPYTELNTGKGEGVAYR(16)-GRLLLSLETKLVEHSEQK(10)	Cross-Linked	BS3	4770	null	5.13e-05	0.0461	-0.001787	-0.374992	sDYSF(593)-sDYSF(610)/	Intra-Protein	1	1	29	11	8.16e-08	3.47e-05	1.3363	sDYSF	16	sDYSF	10	593	610	578	601	EFTGFPDPYTELNTGKGEGVAYR	GRLLLSLETKLVEHSEQK
326	5	2660	KLLSDKPQDFQIR(1)-VTAAGQTKR(8)	Cross-Linked	BS3	2660	null	0.00108	0.0461	-0.000355	-0.133636	sDYSF(258)-sDYSF(297)/	Intra-Protein	1	1	19.5	12.5	7.34e-15	0.00133	1.3363	sDYSF	1	sDYSF	8	258	297	258	290	KLLSDKPQDFQIR	VTAAGQTKR
327	4	2510	LDKTESKIPAR(7)-EKCGSYLEK(2)	Cross-Linked	BS3	2510	Carbamidomethyl[C](17)	5.46e-06	0.0467	0.000276	0.110035	sDYSF(1948)-sDYSF(1537)/	Intra-Protein	1	1	11	9	9.23e-06	1.2e-05	1.33068	sDYSF	7	sDYSF	2	1948	1537	1942	1536	LDKTESKIPAR	EKCGSYLEK
328	4	2850	GKTQEETEDPSVIGEFK(2)-LDKTESK(3)	Cross-Linked	BS3	2850	null	3.91e-05	0.0475	0.003054	1.07105	sDYSF(1578)-sDYSF(1944)/	Intra-Protein	1	1	23.5	5.5	1.45e-09	0.000105	1.32331	sDYSF	2	sDYSF	3	1578	1944	1577	1942	GKTQEETEDPSVIGEFK	LDKTESK
329	4	2510	LDKTESKIPAR(7)-EKCGSYLEK(2)	Cross-Linked	BS3	2510	Carbamidomethyl[C](17)	5.17e-06	0.0477	-7e-06	-0.002791	sDYSF(1948)-sDYSF(1537)/	Intra-Protein	1	1	10	9	2.52e-05	1.35e-05	1.32148	sDYSF	7	sDYSF	2	1948	1537	1942	1536	LDKTESKIPAR	EKCGSYLEK
330	5	2560	KLLSDKPQDFQIR(1)-VKAPVYR(2)	Cross-Linked	BS3	2560	null	3.4e-05	0.0492	0.000439	0.171655	sDYSF(258)-sDYSF(1759)/	Intra-Protein	1	1	11.5	7.5	6.96e-06	2.55e-05	1.30803	sDYSF	1	sDYSF	2	258	1759	258	1758	KLLSDKPQDFQIR	VKAPVYR
331	3	2220	LDKTESKIPAR(3)-KDAFWR(1)	Cross-Linked	BS3	2220	null	3.7e-05	0.0512	0.001635	0.737416	sDYSF(1944)-sDYSF(1936)/	Intra-Protein	1	1	14	7	4.5e-05	5.58e-05	1.29073	sDYSF	3	sDYSF	1	1944	1936	1942	1936	LDKTESKIPAR	KDAFWR
332	4	1860	LLSKFGAR(4)-VKAPVYR(2)	Cross-Linked	BS3	1860	null	2.58e-06	0.0516	0.000222	0.119284	sDYSF(1720)-sDYSF(1759)/	Intra-Protein	1	1	11.5	7.5	9.35e-06	1.99e-10	1.28735	sDYSF	4	sDYSF	2	1720	1759	1717	1758	LLSKFGAR	VKAPVYR
333	5	2660	KLLSDKPQDFQIR(1)-VTAAGQTKR(8)	Cross-Linked	BS3	2660	null	0.027	0.053	-0.000355	-0.133636	sDYSF(258)-sDYSF(297)/	Intra-Protein	1	1	17.5	8.5	2.36e-08	0.0511	1.27572	sDYSF	1	sDYSF	8	258	297	258	290	KLLSDKPQDFQIR	VTAAGQTKR
334	5	3920	FIFPFDYLPAEQVCTIAKKDAFWR(19)-LDKTESK(3)	Cross-Linked	BS3	3920	Carbamidomethyl[C](14)	1.99e-07	0.0534	-0.001118	-0.285204	sDYSF(1936)-sDYSF(1944)/	Intra-Protein	1	1	37	7	3.5e-16	4.08e-06	1.27246	sDYSF	19	sDYSF	3	1936	1944	1918	1942	FIFPFDYLPAEQVCTIAKKDAFWR	LDKTESK
335	4	3390	LYRGKTQEETEDPSVIGEFK(5)-VTAAGQTKR(8)	Cross-Linked	BS3	3390	null	9.35e-06	0.0549	0.006665	1.96333	sDYSF(1578)-sDYSF(297)/	Intra-Protein	1	1	26	14	2.93e-14	5.38e-06	1.26043	sDYSF	5	sDYSF	8	1578	297	1574	290	LYRGKTQEETEDPSVIGEFK	VTAAGQTKR
336	3	3180	GKTQEETEDPSVIGEFK(2)-YPMEKVPGAR(5)	Cross-Linked	BS3	3180	null	5.05e-11	0.0572	-0.00652	-2.05124	sDYSF(1578)-sDYSF(889)/	Intra-Protein	1	1	19	12	1.68e-11	3.64e-10	1.2426	sDYSF	2	sDYSF	5	1578	889	1577	885	GKTQEETEDPSVIGEFK	YPMEKVPGAR
337	6	5270	KDPSEDKEDIESNLLRPTGVALR(1)-EFTGFPDPYTELNTGKGEGVAYR(16)	Cross-Linked	BS3	5270	null	5.33e-05	0.0593	-0.01211	-2.29896	sDYSF(402)-sDYSF(593)/	Intra-Protein	1	1	13.5	22.5	6.08e-05	6.2e-09	1.22695	sDYSF	1	sDYSF	16	402	593	402	578	KDPSEDKEDIESNLLRPTGVALR	EFTGFPDPYTELNTGKGEGVAYR
338	4	3400	EKPAIHHIPGFEVQETSR(2)-DLSQMEALKR(9)	Cross-Linked	BS3	3400	null	4.06e-05	0.0604	0.005015	1.47381	sDYSF(1328)-sDYSF(1104)/	Intra-Protein	1	1	31.5	18.5	2.01e-15	7.71e-05	1.21896	sDYSF	2	sDYSF	9	1328	1104	1327	1096	EKPAIHHIPGFEVQETSR	DLSQMEALKR
339	3	2360	QLPGVNIKPVVK(8)-VTAAGQTKR(8)	Cross-Linked	BS3	2360	null	8.74e-05	0.0608	-0.00474	-2.00813	sDYSF(285)-sDYSF(297)/	Intra-Protein	1	1	15.5	7.5	1.22e-07	0.000174	1.2161	sDYSF	8	sDYSF	8	285	297	278	290	QLPGVNIKPVVK	VTAAGQTKR
340	3	4510	KDPSEDKEDIESNLLRPTGVALR(7)-KWLLLSDPDDFSAGAR(1)	Cross-Linked	BS3	4510	null	1	0.0612	-0.004825	-1.06977	sDYSF(408)-sDYSF(366)/	Intra-Protein	1	1	18	14	1	1	1.21325	sDYSF	7	sDYSF	1	408	366	402	366	KDPSEDKEDIESNLLRPTGVALR	KWLLLSDPDDFSAGAR
341	3	1860	KRSAPTSR(1)-LDKTESK(3)	Cross-Linked	BS3	1860	null	9.94e-07	0.0617	0.000438	0.235482	sDYSF(250)-sDYSF(1944)/	Intra-Protein	1	1	6.5	7.5	8.1e-06	4.18e-05	1.20971	sDYSF	1	sDYSF	3	250	1944	250	1942	KRSAPTSR	LDKTESK
342	6	3470	KLPSRPPPHYPGIKR(14)-KLLSDKPQDFQIR(1)	Cross-Linked	BS3	3470	null	0.000392	0.0617	-0.001736	-0.500582	sDYSF(248)-sDYSF(258)/	Intra-Protein	1	1	13	18	0.00233	2.08e-17	1.20971	sDYSF	14	sDYSF	1	248	258	235	258	KLPSRPPPHYPGIKR	KLLSDKPQDFQIR
343	4	3540	FIFPFDYLPAEQVCTIAKK(18)-EKCGSYLEK(2)	Cross-Linked	BS3	3540	Carbamidomethyl[C](14);Carbamidomethyl[C](25)	1.21e-06	0.0617	-0.000671	-0.189668	sDYSF(1935)-sDYSF(1537)/	Intra-Protein	1	1	26.5	9.5	1.94e-11	5.72e-07	1.20971	sDYSF	18	sDYSF	2	1935	1537	1918	1536	FIFPFDYLPAEQVCTIAKK	EKCGSYLEK
344	6	2510	KLPSRPPPHYPGIKR(1)-KILAGK(1)	Cross-Linked	BS3	2510	null	0.000286	0.0621	-0.004203	-1.67483	sDYSF(235)-sDYSF(2026)/	Intra-Protein	1	1	12	8	0.000286	0.000403	1.20691	sDYSF	1	sDYSF	1	235	2026	235	2026	KLPSRPPPHYPGIKR	KILAGK
345	6	2780	KLPSRPPPHYPGIKR(1)-KRSAPTSR(1)	Cross-Linked	BS3	2780	null	1.14e-05	0.063	-0.005658	-2.03335	sDYSF(235)-sDYSF(250)/	Intra-Protein	1	1	18.5	6.5	7e-09	3.54e-05	1.20066	sDYSF	1	sDYSF	1	235	250	235	250	KLPSRPPPHYPGIKR	KRSAPTSR
346	5	6330	ISAPGGEIEEEPAGAVKPSKASDLDDYLGFLPTFGPCYINLYGSPR(20)-QLPGVNIKPVVK(8)	Cross-Linked	BS3	6330	Carbamidomethyl[C](37)	3.14e-08	0.0632	0.004608	0.728278	sDYSF(551)-sDYSF(285)/	Intra-Protein	1	1	47.5	15.5	1.17e-10	2.31e-07	1.19928	sDYSF	20	sDYSF	8	551	285	532	278	ISAPGGEIEEEPAGAVKPSKASDLDDYLGFLPTFGPCYINLYGSPR	QLPGVNIKPVVK
347	4	2630	KLLSDKPQDFQIR(1)-KRSAPTSR(1)	Cross-Linked	BS3	2630	null	1.76e-09	0.0633	-0.000969	-0.368797	sDYSF(258)-sDYSF(250)/	Intra-Protein	1	1	33	7	3.08e-25	2.76e-07	1.1986	sDYSF	1	sDYSF	1	258	250	258	250	KLLSDKPQDFQIR	KRSAPTSR
348	4	3320	GKTQEETEDPSVIGEFK(2)-QLPGVNIKPVVK(8)	Cross-Linked	BS3	3320	null	1.55e-05	0.0637	0.009808	2.95175	sDYSF(1578)-sDYSF(285)/	Intra-Protein	1	1	17.5	14.5	5.85e-07	3.95e-05	1.19586	sDYSF	2	sDYSF	8	1578	285	1577	278	GKTQEETEDPSVIGEFK	QLPGVNIKPVVK
349	4	3390	ISAPGGEIEEEPAGAVKPSK(17)-QLPGVNIKPVVK(8)	Cross-Linked	BS3	3390	null	1.37e-05	0.0652	-0.003034	-0.893698	sDYSF(548)-sDYSF(285)/	Intra-Protein	1	1	18.5	12.5	3.28e-06	2.22e-05	1.18575	sDYSF	17	sDYSF	8	548	285	532	278	ISAPGGEIEEEPAGAVKPSK	QLPGVNIKPVVK
350	6	3660	DPNGKCDPYIKISIGKK(11)-KLLSDKPQDFQIR(1)	Cross-Linked	BS3	3660	Carbamidomethyl[C](6)	0.00235	0.0664	-0.00228	-0.623297	sDYSF(1651)-sDYSF(258)/	Intra-Protein	1	1	12	13	0.00481	4.25e-07	1.17783	sDYSF	11	sDYSF	1	1651	258	1641	258	DPNGKCDPYIKISIGKK	KLLSDKPQDFQIR
351	5	5840	ISAPGGEIEEEPAGAVKPSKASDLDDYLGFLPTFGPCYINLYGSPR(17)-VEKYLR(3)	Cross-Linked	BS3	5840	Carbamidomethyl[C](37)	0.1	0.0665	0.002116	0.362148	sDYSF(548)-sDYSF(632)/	Intra-Protein	1	1	54	5	1.22e-14	0.162	1.17718	sDYSF	17	sDYSF	3	548	632	532	630	ISAPGGEIEEEPAGAVKPSKASDLDDYLGFLPTFGPCYINLYGSPR	VEKYLR
352	5	4950	DFDTLKVYDTQLENVEAFEGLSDFCNTFKLYR(29)-VTAAGQTKR(8)	Cross-Linked	BS3	4950	Carbamidomethyl[C](25)	0.000427	0.067	0.008778	1.77462	sDYSF(1573)-sDYSF(297)/	Intra-Protein	1	1	38.5	7.5	2.35e-09	0.000286	1.17393	sDYSF	29	sDYSF	8	1573	297	1545	290	DFDTLKVYDTQLENVEAFEGLSDFCNTFKLYR	VTAAGQTKR
353	4	3490	GKTQEETEDPSVIGEFK(2)-LLSDKPQDFQIR(5)	Cross-Linked	BS3	3490	null	8.58e-06	0.0673	-0.00367	-1.05135	sDYSF(1578)-sDYSF(263)/	Intra-Protein	1	1	18	13	1e-05	4.67e-06	1.17198	sDYSF	2	sDYSF	5	1578	263	1577	259	GKTQEETEDPSVIGEFK	LLSDKPQDFQIR
354	5	4500	LVEHSEQKVEDLPADDILR(8)-NLVDPFVEVSFAGKMLCSK(14)	Cross-Linked	BS3	4500	Carbamidomethyl[C](39);Oxidation[M](37)	5.4e-05	0.0684	0.019917	4.42574	sDYSF(618)-sDYSF(474)/	Intra-Protein	1	1	23	22	8.52e-05	3.21e-06	1.16494	sDYSF	8	sDYSF	14	618	474	611	461	LVEHSEQKVEDLPADDILR	NLVDPFVEVSFAGKMLCSK
355	3	2690	DEKIGETVVDLENR(3)-VTAAGQTKR(8)	Cross-Linked	BS3	2690	null	0.000333	0.0688	0.000986	0.36717	sDYSF(1705)-sDYSF(297)/	Intra-Protein	1	1	16.5	11.5	1.04e-05	0.00113	1.16241	sDYSF	3	sDYSF	8	1705	297	1703	290	DEKIGETVVDLENR	VTAAGQTKR
356	4	3180	GLFKIYPLPEDPAIPMPPR(4)-LLSKFGAR(4)	Cross-Linked	BS3	3180	null	0.00433	0.0691	0.007665	2.41055	sDYSF(1597)-sDYSF(1720)/	Intra-Protein	1	1	30	6	1.29e-11	0.00962	1.16052	sDYSF	4	sDYSF	4	1597	1720	1594	1717	GLFKIYPLPEDPAIPMPPR	LLSKFGAR
357	3	2080	DLSQMEALKR(9)-KTDAFR(1)	Cross-Linked	BS3	2080	Oxidation[M](5)	5.3e-13	0.0692	-0.001496	-0.718861	sDYSF(1104)-sDYSF(1132)/	Intra-Protein	1	1	19.5	5.5	1.74e-11	1.62e-16	1.15989	sDYSF	9	sDYSF	1	1104	1132	1096	1132	DLSQMEALKR	KTDAFR
358	4	5270	KDPSEDKEDIESNLLRPTGVALR(1)-EFTGFPDPYTELNTGKGEGVAYR(16)	Cross-Linked	BS3	5270	null	5.45e-14	0.0693	-0.004926	-0.93515	sDYSF(402)-sDYSF(593)/	Intra-Protein	1	1	13.5	41.5	6.41e-11	5.83e-12	1.15927	sDYSF	1	sDYSF	16	402	593	402	578	KDPSEDKEDIESNLLRPTGVALR	EFTGFPDPYTELNTGKGEGVAYR
359	5	4890	KDPSEDKEDIESNLLRPTGVALR(1)-GYLKTSLCVLGPGDEAPLER(4)	Cross-Linked	BS3	4890	Carbamidomethyl[C](34)	0.000158	0.0702	0.004012	0.819693	sDYSF(402)-sDYSF(385)/	Intra-Protein	1	1	11.5	26.5	0.000157	1.22e-15	1.15366	sDYSF	1	sDYSF	4	402	385	402	382	KDPSEDKEDIESNLLRPTGVALR	GYLKTSLCVLGPGDEAPLER
360	4	2830	KWLLLSDPDDFSAGAR(1)-KRSAPTSR(1)	Cross-Linked	BS3	2830	null	0.00789	0.0707	0.000339	0.119767	sDYSF(366)-sDYSF(250)/	Intra-Protein	1	1	24.5	4.5	6.39e-08	0.0199	1.15058	sDYSF	1	sDYSF	1	366	250	366	250	KWLLLSDPDDFSAGAR	KRSAPTSR
361	4	3470	KLPSRPPPHYPGIKR(14)-KLLSDKPQDFQIR(1)	Cross-Linked	BS3	3470	null	1.68e-07	0.072	-0.002842	-0.819501	sDYSF(248)-sDYSF(258)/	Intra-Protein	1	1	19	30	4.68e-07	4.75e-26	1.14267	sDYSF	14	sDYSF	1	248	258	235	258	KLPSRPPPHYPGIKR	KLLSDKPQDFQIR
362	6	3710	EKPAIHHIPGFEVQETSR(2)-RRDLSQMEALKR(11)	Cross-Linked	BS3	3710	null	0.000681	0.0724	0.001296	0.348861	sDYSF(1328)-sDYSF(1104)/	Intra-Protein	1	1	34.5	6.5	1.85e-17	0.000257	1.14026	sDYSF	2	sDYSF	11	1328	1104	1327	1094	EKPAIHHIPGFEVQETSR	RRDLSQMEALKR
363	6	5270	KDPSEDKEDIESNLLRPTGVALR(1)-EFTGFPDPYTELNTGKGEGVAYR(16)	Cross-Linked	BS3	5270	null	2.24e-05	0.0768	-0.01211	-2.29896	sDYSF(402)-sDYSF(593)/	Intra-Protein	1	1	12.5	28.5	2.59e-05	2.09e-12	1.11464	sDYSF	1	sDYSF	16	402	593	402	578	KDPSEDKEDIESNLLRPTGVALR	EFTGFPDPYTELNTGKGEGVAYR
364	6	3850	ISAPGGEIEEEPAGAVKPSK(17)-KLPSRPPPHYPGIKR(1)	Cross-Linked	BS3	3850	null	1.85e-05	0.0775	0.004176	1.08578	sDYSF(548)-sDYSF(235)/	Intra-Protein	1	1	24	13	4.08e-10	2.13e-05	1.1107	sDYSF	17	sDYSF	1	548	235	532	235	ISAPGGEIEEEPAGAVKPSK	KLPSRPPPHYPGIKR
365	5	4360	FIFPFDYLPAEQVCTIAKK(18)-DAFWRLDKTESKIPAR(8)	Cross-Linked	BS3	4360	Carbamidomethyl[C](14)	9.04e-06	0.0782	-0.000346	-0.079407	sDYSF(1935)-sDYSF(1944)/	Intra-Protein	1	1	30	13	8.96e-12	3.16e-06	1.10679	sDYSF	18	sDYSF	8	1935	1944	1918	1937	FIFPFDYLPAEQVCTIAKK	DAFWRLDKTESKIPAR
366	3	2220	DLSQMEALKR(9)-KTDAFRR(1)	Cross-Linked	BS3	2220	null	4.2e-07	0.0787	0.000781	0.351616	sDYSF(1104)-sDYSF(1132)/	Intra-Protein	1	1	14.5	7.5	3.39e-09	1.96e-07	1.10403	sDYSF	9	sDYSF	1	1104	1132	1096	1132	DLSQMEALKR	KTDAFRR
367	4	3980	GKTQEETEDPSVIGEFK(2)-EELYCPPITVKVIDNR(11)	Cross-Linked	BS3	3980	Carbamidomethyl[C](25)	2.61e-07	0.0832	0.001433	0.360324	sDYSF(1578)-sDYSF(1451)/	Intra-Protein	1	1	14	23	4.17e-08	2.17e-08	1.07988	sDYSF	2	sDYSF	11	1578	1451	1577	1441	GKTQEETEDPSVIGEFK	EELYCPPITVKVIDNR
368	4	2220	LDKTESKIPAR(3)-KDAFWR(1)	Cross-Linked	BS3	2220	null	0.0573	0.0844	0.001575	0.710355	sDYSF(1944)-sDYSF(1936)/	Intra-Protein	1	1	27	6	1.58e-08	0.117	1.07366	sDYSF	3	sDYSF	1	1944	1936	1942	1936	LDKTESKIPAR	KDAFWR
369	4	4510	KDPSEDKEDIESNLLRPTGVALR(7)-KWLLLSDPDDFSAGAR(1)	Cross-Linked	BS3	4510	null	1.58e-06	0.0847	0.005152	1.14227	sDYSF(408)-sDYSF(366)/	Intra-Protein	1	1	15.5	22.5	1.1e-05	1.24e-10	1.07212	sDYSF	7	sDYSF	1	408	366	402	366	KDPSEDKEDIESNLLRPTGVALR	KWLLLSDPDDFSAGAR
370	3	4390	NMKSYQLANISSPSLVVECGGQTVQSCVIR(3)-VTAAGQTKR(8)	Cross-Linked	BS3	4390	Carbamidomethyl[C](19);Carbamidomethyl[C](27)	5.35e-08	0.0856	-0.000488	-0.111055	sDYSF(1392)-sDYSF(297)/	Intra-Protein	1	1	37.5	7.5	1.42e-12	2.78e-11	1.06753	sDYSF	3	sDYSF	8	1392	297	1390	290	NMKSYQLANISSPSLVVECGGQTVQSCVIR	VTAAGQTKR
371	5	4010	ITLYDYDLLSKDEKIGETVVDLENR(14)-VTAAGQTKR(8)	Cross-Linked	BS3	4010	null	0.02	0.0902	0.007355	1.83412	sDYSF(1705)-sDYSF(297)/	Intra-Protein	1	1	39.5	9.5	7.8e-13	0.0462	1.04479	sDYSF	14	sDYSF	8	1705	297	1692	290	ITLYDYDLLSKDEKIGETVVDLENR	VTAAGQTKR
372	5	4680	EFTGFPDPYTELNTGKGEGVAYR(16)-LQTIFLKYPMEKVPGAR(12)	Cross-Linked	BS3	4680	null	4.08e-05	0.0908	0.007835	1.67544	sDYSF(593)-sDYSF(889)/	Intra-Protein	1	1	25.5	10.5	7.69e-08	1.97e-05	1.04191	sDYSF	16	sDYSF	12	593	889	578	878	EFTGFPDPYTELNTGKGEGVAYR	LQTIFLKYPMEKVPGAR
373	5	4100	VLPKDDIECPLGWKWEDEEWSTDLNR(14)-KTDAFR(1)	Cross-Linked	BS3	4100	Carbamidomethyl[C](9)	0.000621	0.0923	-0.003495	-0.851408	sDYSF(1040)-sDYSF(1132)/	Intra-Protein	1	1	20.5	5.5	2.35e-07	0.000923	1.0348	sDYSF	14	sDYSF	1	1040	1132	1027	1132	VLPKDDIECPLGWKWEDEEWSTDLNR	KTDAFR
374	4	3180	GLFKIYPLPEDPAIPMPPR(4)-LLSKFGAR(4)	Cross-Linked	BS3	3180	null	0.00201	0.0935	0.006739	2.11934	sDYSF(1597)-sDYSF(1720)/	Intra-Protein	1	1	27.5	7.5	4.47e-08	0.00296	1.02919	sDYSF	4	sDYSF	4	1597	1720	1594	1717	GLFKIYPLPEDPAIPMPPR	LLSKFGAR
375	6	2780	KLPSRPPPHYPGIKR(1)-KRSAPTSR(1)	Cross-Linked	BS3	2780	null	0.000112	0.0952	-0.005749	-2.06606	sDYSF(235)-sDYSF(250)/	Intra-Protein	1	1	8.5	8.5	0.00041	1.72e-05	1.02136	sDYSF	1	sDYSF	1	235	250	235	250	KLPSRPPPHYPGIKR	KRSAPTSR
376	5	4680	EFTGFPDPYTELNTGKGEGVAYR(16)-LQTIFLKYPMEKVPGAR(12)	Cross-Linked	BS3	4680	null	2.22e-06	0.0953	0.007835	1.67544	sDYSF(593)-sDYSF(889)/	Intra-Protein	1	1	25.5	11.5	5.36e-10	2.14e-05	1.02091	sDYSF	16	sDYSF	12	593	889	578	878	EFTGFPDPYTELNTGKGEGVAYR	LQTIFLKYPMEKVPGAR
377	5	3920	FIFPFDYLPAEQVCTIAKK(18)-DAFWRLDKTESK(8)	Cross-Linked	BS3	3920	Carbamidomethyl[C](14)	2.33e-08	0.0962	-0.000284	-0.072449	sDYSF(1935)-sDYSF(1944)/	Intra-Protein	1	1	34.5	11.5	1.61e-14	3.01e-08	1.01682	sDYSF	18	sDYSF	8	1935	1944	1918	1937	FIFPFDYLPAEQVCTIAKK	DAFWRLDKTESK
378	6	4350	AVDEQGWEYSITIPPERKPK(18)-HWVPAEKMYYTHRR(7)	Cross-Linked	BS3	4350	null	0.00131	0.0967	0.000423	0.097148	sDYSF(1070)-sDYSF(1079)/	Intra-Protein	1	1	19	8	4.73e-08	0.00213	1.01457	sDYSF	18	sDYSF	7	1070	1079	1053	1073	AVDEQGWEYSITIPPERKPK	HWVPAEKMYYTHRR
379	4	2220	LDKTESKIPAR(3)-KDAFWR(1)	Cross-Linked	BS3	2220	null	0.000676	0.0968	0.000903	0.40727	sDYSF(1944)-sDYSF(1936)/	Intra-Protein	1	1	11.5	6.5	0.0011	4.36e-06	1.01412	sDYSF	3	sDYSF	1	1944	1936	1942	1936	LDKTESKIPAR	KDAFWR
380	4	3200	GLFKIYPLPEDPAIPMPPR(4)-LLSKFGAR(4)	Cross-Linked	BS3	3200	Oxidation[M](16)	0.000587	0.0986	0.004914	1.53766	sDYSF(1597)-sDYSF(1720)/	Intra-Protein	1	1	45	8	6.46e-13	0.00139	1.00612	sDYSF	4	sDYSF	4	1597	1720	1594	1717	GLFKIYPLPEDPAIPMPPR	LLSKFGAR
381	6	6000	LLLSLETKLVEHSEQKVEDLPADDILR(8)-EFTGFPDPYTELNTGKGEGVAYRGR(16)	Cross-Linked	BS3	6000	null	7.21e-05	0.0995	0.008992	1.49815	sDYSF(610)-sDYSF(593)/	Intra-Protein	1	1	18.5	11.5	2.26e-06	0.000366	1.00218	sDYSF	8	sDYSF	16	610	593	603	578	LLLSLETKLVEHSEQKVEDLPADDILR	EFTGFPDPYTELNTGKGEGVAYRGR
382	3	2370	KLLSDKPQDFQIR(6)-ISIGKK(5)	Cross-Linked	BS3	2370	null	0.000886	0.1	-0.001361	-0.574171	sDYSF(263)-sDYSF(1656)/	Intra-Protein	1	1	24.5	6.5	2.73e-09	0.00143	1	sDYSF	6	sDYSF	5	263	1656	258	1652	KLLSDKPQDFQIR	ISIGKK
383	5	4370	VMFQDKEYSIEEIEAGRIPNPHLGPVEER(6)-VKAPVYR(2)	Cross-Linked	BS3	4370	Oxidation[M](2)	1.39e-05	0.103	-0.016883	-3.86495	sDYSF(1773)-sDYSF(1759)/	Intra-Protein	1	1	51.5	8.5	4.18e-18	1.31e-05	0.987163	sDYSF	6	sDYSF	2	1773	1759	1768	1758	VMFQDKEYSIEEIEAGRIPNPHLGPVEER	VKAPVYR
384	4	2630	KLLSDKPQDFQIR(6)-KRSAPTSR(1)	Cross-Linked	BS3	2630	null	1.55e-06	0.103	0.000243	0.092485	sDYSF(263)-sDYSF(250)/	Intra-Protein	1	1	26	6	1.32e-15	7.72e-08	0.987163	sDYSF	6	sDYSF	1	263	250	258	250	KLLSDKPQDFQIR	KRSAPTSR
385	5	4740	HAYLRKWLLLSDPDDFSAGAR(6)-GYLKTSLCVLGPGDEAPLER(4)	Cross-Linked	BS3	4740	Carbamidomethyl[C](32)	0.0109	0.103	0.008617	1.81662	sDYSF(366)-sDYSF(385)/	Intra-Protein	1	1	10.5	18.5	0.0186	9.29e-06	0.987163	sDYSF	6	sDYSF	4	366	385	361	382	HAYLRKWLLLSDPDDFSAGAR	GYLKTSLCVLGPGDEAPLER
386	5	3770	GKTQEETEDPSVIGEFK(2)-KLPSRPPPHYPGIKR(1)	Cross-Linked	BS3	3770	null	7.44e-06	0.109	1.2e-05	0.00318	sDYSF(1578)-sDYSF(235)/	Intra-Protein	1	1	25	11	4.61e-13	1.96e-05	0.962574	sDYSF	2	sDYSF	1	1578	235	1577	235	GKTQEETEDPSVIGEFK	KLPSRPPPHYPGIKR
387	6	3670	KWLLLSDPDDFSAGAR(1)-KLPSRPPPHYPGIKR(14)	Cross-Linked	BS3	3670	null	0.000686	0.11	-0.003513	-0.956964	sDYSF(366)-sDYSF(248)/	Intra-Protein	1	1	22.5	8.5	5.21e-14	0.00507	0.958607	sDYSF	1	sDYSF	14	366	248	366	235	KWLLLSDPDDFSAGAR	KLPSRPPPHYPGIKR
388	4	3230	TVKGWWPCVAEEGEK(3)-DEPNMNPKLED(8)	Cross-Linked	BS3	3230	Carbamidomethyl[C](8);Oxidation[M](23)	7.04e-06	0.111	0.002457	0.760571	sDYSF(2013)-sDYSF(2061)/	Intra-Protein	1	1	20	17	5.07e-10	5.04e-06	0.954677	sDYSF	3	sDYSF	8	2013	2061	2011	2054	TVKGWWPCVAEEGEK	DEPNMNPKLED
389	4	2960	GKTQEETEDPSVIGEFK(2)-VTAAGQTKR(8)	Cross-Linked	BS3	2960	null	0.000934	0.112	-0.004205	-1.41941	sDYSF(1578)-sDYSF(297)/	Intra-Protein	1	1	14	13	6.21e-09	0.00114	0.950782	sDYSF	2	sDYSF	8	1578	297	1577	290	GKTQEETEDPSVIGEFK	VTAAGQTKR
390	5	3820	DDIECPLGWKWEDEEWSTDLNR(10)-KTDAFRR(1)	Cross-Linked	BS3	3820	Carbamidomethyl[C](5)	0.000285	0.112	-0.013672	-3.57553	sDYSF(1040)-sDYSF(1132)/	Intra-Protein	1	1	39.5	6.5	2.41e-19	0.000431	0.950782	sDYSF	10	sDYSF	1	1040	1132	1031	1132	DDIECPLGWKWEDEEWSTDLNR	KTDAFRR
391	4	2830	KWLLLSDPDDFSAGAR(1)-KRSAPTSR(1)	Cross-Linked	BS3	2830	null	5.38e-05	0.112	0.002933	1.03622	sDYSF(366)-sDYSF(250)/	Intra-Protein	1	1	33.5	5.5	2.14e-13	4.62e-05	0.950782	sDYSF	1	sDYSF	1	366	250	366	250	KWLLLSDPDDFSAGAR	KRSAPTSR
392	5	4360	FIFPFDYLPAEQVCTIAKK(18)-DAFWRLDKTESKIPAR(8)	Cross-Linked	BS3	4360	Carbamidomethyl[C](14)	0.000759	0.114	-0.000346	-0.079407	sDYSF(1935)-sDYSF(1944)/	Intra-Protein	1	1	19	12	2.1e-06	0.000457	0.943095	sDYSF	18	sDYSF	8	1935	1944	1918	1937	FIFPFDYLPAEQVCTIAKK	DAFWRLDKTESKIPAR
393	4	2380	RDLSQMEALKR(10)-KTDAFRR(1)	Cross-Linked	BS3	2380	null	3.97e-08	0.116	-0.001484	-0.624244	sDYSF(1104)-sDYSF(1132)/	Intra-Protein	1	1	12	11	4.9e-08	6.15e-08	0.935542	sDYSF	10	sDYSF	1	1104	1132	1095	1132	RDLSQMEALKR	KTDAFRR
394	4	2700	DPNGKCDPYIK(5)-LDKTESKIPAR(3)	Cross-Linked	BS3	2700	Carbamidomethyl[C](6)	2.98e-05	0.117	0.002084	0.771456	sDYSF(1645)-sDYSF(1944)/	Intra-Protein	1	1	13	15	2.08e-05	2.21e-05	0.931814	sDYSF	5	sDYSF	3	1645	1944	1641	1942	DPNGKCDPYIK	LDKTESKIPAR
395	5	3670	KWLLLSDPDDFSAGAR(1)-KLPSRPPPHYPGIKR(1)	Cross-Linked	BS3	3670	null	0.00131	0.119	0.001919	0.522748	sDYSF(366)-sDYSF(235)/	Intra-Protein	1	1	21.5	11.5	2.4e-10	0.0028	0.924453	sDYSF	1	sDYSF	1	366	235	366	235	KWLLLSDPDDFSAGAR	KLPSRPPPHYPGIKR
396	7	6000	LLLSLETKLVEHSEQKVEDLPADDILR(8)-EFTGFPDPYTELNTGKGEGVAYRGR(16)	Cross-Linked	BS3	6000	null	8.44e-07	0.121	0.007408	1.23424	sDYSF(610)-sDYSF(593)/	Intra-Protein	1	1	17.5	15.5	1.7e-07	3.64e-06	0.917215	sDYSF	8	sDYSF	16	610	593	603	578	LLLSLETKLVEHSEQKVEDLPADDILR	EFTGFPDPYTELNTGKGEGVAYRGR
397	5	4390	NMKSYQLANISSPSLVVECGGQTVQSCVIR(3)-VTAAGQTKR(8)	Cross-Linked	BS3	4390	Carbamidomethyl[C](19);Carbamidomethyl[C](27)	0.036	0.122	-0.000324	-0.073733	sDYSF(1392)-sDYSF(297)/	Intra-Protein	1	1	29.5	9.5	8.15e-06	0.096	0.91364	sDYSF	3	sDYSF	8	1392	297	1390	290	NMKSYQLANISSPSLVVECGGQTVQSCVIR	VTAAGQTKR
398	4	2220	DLSQMEALKR(9)-KTDAFRR(1)	Cross-Linked	BS3	2220	null	2.03e-06	0.122	0.001064	0.479026	sDYSF(1104)-sDYSF(1132)/	Intra-Protein	1	1	17.5	6.5	4.05e-06	2.27e-06	0.91364	sDYSF	9	sDYSF	1	1104	1132	1096	1132	DLSQMEALKR	KTDAFRR
399	5	4230	LSVFAETYENETKLALVGNWGTTGLTYPK(13)-KTDAFRR(1)	Cross-Linked	BS3	4230	null	0.0125	0.123	-0.000306	-0.072286	sDYSF(934)-sDYSF(1132)/	Intra-Protein	1	1	35	6	5.49e-10	0.0247	0.910095	sDYSF	13	sDYSF	1	934	1132	922	1132	LSVFAETYENETKLALVGNWGTTGLTYPK	KTDAFRR
400	6	3680	FIFPFDYLPAEQVCTIAKK(18)-LDKTESKIPAR(3)	Cross-Linked	BS3	3680	Carbamidomethyl[C](14)	4.22e-08	0.124	0.005084	1.38079	sDYSF(1935)-sDYSF(1944)/	Intra-Protein	1	1	19	11	1.5e-06	2.1e-08	0.906578	sDYSF	18	sDYSF	3	1935	1944	1918	1942	FIFPFDYLPAEQVCTIAKK	LDKTESKIPAR
401	4	3390	LYRGKTQEETEDPSVIGEFK(5)-VTAAGQTKR(8)	Cross-Linked	BS3	3390	null	0.000243	0.124	0.006665	1.96333	sDYSF(1578)-sDYSF(297)/	Intra-Protein	1	1	23	12	1.4e-11	0.000441	0.906578	sDYSF	5	sDYSF	8	1578	297	1574	290	LYRGKTQEETEDPSVIGEFK	VTAAGQTKR
402	4	2430	YPMEKVPGAR(5)-YPMEKVPGAR(5)	Cross-Linked	BS3	2430	null	1	0.143	0.007647	3.14401	sDYSF(889)-sDYSF(889)/	Inter-Protein	1	1	2	2	1	1	0.844664	sDYSF	5	sDYSF	5	889	889	885	885	YPMEKVPGAR	YPMEKVPGAR
403	5	5040	NCGKLQTIFLKYPMEKVPGAR(4)-NCGKLQTIFLKYPMEKVPGAR(4)	Cross-Linked	BS3	5040	Carbamidomethyl[C](2);Carbamidomethyl[C](26)	1	0.197	0.016468	3.26897	sDYSF(877)-sDYSF(877)/	Inter-Protein	1	1	3	3	1	1	0.705534	sDYSF	4	sDYSF	4	877	877	874	874	NCGKLQTIFLKYPMEKVPGAR	NCGKLQTIFLKYPMEKVPGAR
404	3	2370	KLLSDKPQDFQIR(6)-ISIGKK(5)	Cross-Linked	BS3	2370	null	0.0106	0.127	-0.000871	-0.367452	sDYSF(263)-sDYSF(1656)/	Intra-Protein	1	1	23	5	9.27e-07	0.029	0.896196	sDYSF	6	sDYSF	5	263	1656	258	1652	KLLSDKPQDFQIR	ISIGKK
405	5	3950	KCSLDQLDDAFHPEWFVSLFEQK(1)-MPKPAKTAK(6)	Cross-Linked	BS3	3950	Carbamidomethyl[C](2)	0.000599	0.128	-0.001971	-0.499244	sDYSF(1988)-sDYSF(1984)/	Intra-Protein	1	1	24.5	7.5	2.69e-11	0.00151	0.89279	sDYSF	1	sDYSF	6	1988	1984	1988	1979	KCSLDQLDDAFHPEWFVSLFEQK	MPKPAKTAK
406	5	5270	KDPSEDKEDIESNLLRPTGVALR(1)-EFTGFPDPYTELNTGKGEGVAYR(16)	Cross-Linked	BS3	5270	null	1.38e-07	0.129	-0.004726	-0.897182	sDYSF(402)-sDYSF(593)/	Intra-Protein	1	1	13.5	31.5	4.81e-06	1.12e-12	0.88941	sDYSF	1	sDYSF	16	402	593	402	578	KDPSEDKEDIESNLLRPTGVALR	EFTGFPDPYTELNTGKGEGVAYR
407	5	4060	QLPGVNIKPVVKVTAAGQTKR(12)-ITLYDYDLLSKDEK(11)	Cross-Linked	BS3	4060	null	2.13e-05	0.129	0.007172	1.7677	sDYSF(289)-sDYSF(1702)/	Intra-Protein	1	1	20	15	1.87e-05	2.29e-05	0.88941	sDYSF	12	sDYSF	11	289	1702	278	1692	QLPGVNIKPVVKVTAAGQTKR	ITLYDYDLLSKDEK
408	5	3470	KLPSRPPPHYPGIKR(14)-KLLSDKPQDFQIR(1)	Cross-Linked	BS3	3470	null	6.13e-07	0.132	-0.000487	-0.140428	sDYSF(248)-sDYSF(258)/	Intra-Protein	1	1	19.5	23.5	2.06e-06	1.73e-12	0.879426	sDYSF	14	sDYSF	1	248	258	235	258	KLPSRPPPHYPGIKR	KLLSDKPQDFQIR
409	5	4890	KDPSEDKEDIESNLLRPTGVALR(7)-GYLKTSLCVLGPGDEAPLER(4)	Cross-Linked	BS3	4890	Carbamidomethyl[C](34)	0.0118	0.132	0.003249	0.663804	sDYSF(408)-sDYSF(385)/	Intra-Protein	1	1	10.5	27.5	0.017	7.01e-12	0.879426	sDYSF	7	sDYSF	4	408	385	402	382	KDPSEDKEDIESNLLRPTGVALR	GYLKTSLCVLGPGDEAPLER
410	6	4770	EFTGFPDPYTELNTGKGEGVAYRGR(16)-LLLSLETKLVEHSEQK(8)	Cross-Linked	BS3	4770	null	1.25e-05	0.137	0.021445	4.50011	sDYSF(593)-sDYSF(610)/	Intra-Protein	1	1	21	12	2.58e-05	5.22e-06	0.863279	sDYSF	16	sDYSF	8	593	610	578	603	EFTGFPDPYTELNTGKGEGVAYRGR	LLLSLETKLVEHSEQK
411	4	2700	KLPSRPPPHYPGIKR(14)-LDKTESK(3)	Cross-Linked	BS3	2700	null	7.49e-06	0.14	0.000225	0.083317	sDYSF(248)-sDYSF(1944)/	Intra-Protein	1	1	21	5	5.47e-06	2.63e-10	0.853872	sDYSF	14	sDYSF	3	248	1944	235	1942	KLPSRPPPHYPGIKR	LDKTESK
412	6	3470	KLPSRPPPHYPGIKR(14)-KLLSDKPQDFQIR(1)	Cross-Linked	BS3	3470	null	0.00242	0.141	-0.001105	-0.318631	sDYSF(248)-sDYSF(258)/	Intra-Protein	1	1	14.5	15.5	0.00285	2.63e-15	0.850781	sDYSF	14	sDYSF	1	248	258	235	258	KLPSRPPPHYPGIKR	KLLSDKPQDFQIR
413	4	3830	EFTGFPDPYTELNTGKGEGVAYR(16)-YPMEKVPGAR(5)	Cross-Linked	BS3	3830	null	6.22e-05	0.141	-0.000497	-0.129668	sDYSF(593)-sDYSF(889)/	Intra-Protein	1	1	40.5	9.5	1.12e-10	0.000126	0.850781	sDYSF	16	sDYSF	5	593	889	578	885	EFTGFPDPYTELNTGKGEGVAYR	YPMEKVPGAR
414	4	2930	GKTQEETEDPSVIGEFK(2)-KRSAPTSR(1)	Cross-Linked	BS3	2930	null	2.31e-06	0.141	-0.001089	-0.371231	sDYSF(1578)-sDYSF(250)/	Intra-Protein	1	1	37	4	1.59e-22	2.96e-05	0.850781	sDYSF	2	sDYSF	1	1578	250	1577	250	GKTQEETEDPSVIGEFK	KRSAPTSR
415	4	2220	DLSQMEALKR(9)-KTDAFRR(1)	Cross-Linked	BS3	2220	null	8.72e-08	0.141	0.000611	0.27508	sDYSF(1104)-sDYSF(1132)/	Intra-Protein	1	1	16.5	7.5	2.76e-07	7.61e-11	0.850781	sDYSF	9	sDYSF	1	1104	1132	1096	1132	DLSQMEALKR	KTDAFRR
416	7	6000	LLLSLETKLVEHSEQKVEDLPADDILR(8)-EFTGFPDPYTELNTGKGEGVAYRGR(16)	Cross-Linked	BS3	6000	null	2.04e-07	0.142	0.005541	0.923181	sDYSF(610)-sDYSF(593)/	Intra-Protein	1	1	16.5	12.5	6.82e-10	9.12e-06	0.847712	sDYSF	8	sDYSF	16	610	593	603	578	LLLSLETKLVEHSEQKVEDLPADDILR	EFTGFPDPYTELNTGKGEGVAYRGR
417	6	4710	QLPGVNIKPVVKVTAAGQTKR(8)-KLLSDKPQDFQIRVQVIEGR(6)	Cross-Linked	BS3	4710	null	0.00826	0.143	0.002452	0.520516	sDYSF(285)-sDYSF(263)/	Intra-Protein	1	1	23.5	9.5	3.53e-08	0.0187	0.844664	sDYSF	8	sDYSF	6	285	263	278	258	QLPGVNIKPVVKVTAAGQTKR	KLLSDKPQDFQIRVQVIEGR
418	6	6000	LLLSLETKLVEHSEQKVEDLPADDILR(8)-EFTGFPDPYTELNTGKGEGVAYRGR(16)	Cross-Linked	BS3	6000	null	4.04e-07	0.144	0.007981	1.32971	sDYSF(610)-sDYSF(593)/	Intra-Protein	1	1	17.5	14.5	1.86e-07	3.05e-06	0.841638	sDYSF	8	sDYSF	16	610	593	603	578	LLLSLETKLVEHSEQKVEDLPADDILR	EFTGFPDPYTELNTGKGEGVAYRGR
419	6	6000	LLLSLETKLVEHSEQKVEDLPADDILR(8)-EFTGFPDPYTELNTGKGEGVAYRGR(16)	Cross-Linked	BS3	6000	null	3.29e-07	0.144	0.006678	1.11262	sDYSF(610)-sDYSF(593)/	Intra-Protein	1	1	15.5	14.5	1.08e-07	1.78e-06	0.841638	sDYSF	8	sDYSF	16	610	593	603	578	LLLSLETKLVEHSEQKVEDLPADDILR	EFTGFPDPYTELNTGKGEGVAYRGR
420	5	4070	HRQAEAEGEGWEYASLFGWKFHLEYR(20)-KTDAFR(1)	Cross-Linked	BS3	4070	null	0.00342	0.149	0.00177	0.434787	sDYSF(1125)-sDYSF(1132)/	Intra-Protein	1	1	42.5	2.5	6.02e-10	0.00526	0.826814	sDYSF	20	sDYSF	1	1125	1132	1106	1132	HRQAEAEGEGWEYASLFGWKFHLEYR	KTDAFR
421	4	2530	RRDLSQMEALKR(11)-KTDAFRR(1)	Cross-Linked	BS3	2530	null	4.47e-06	0.15	-0.000577	-0.227759	sDYSF(1104)-sDYSF(1132)/	Intra-Protein	1	1	10	7	2.61e-06	8.6e-09	0.823909	sDYSF	11	sDYSF	1	1104	1132	1094	1132	RRDLSQMEALKR	KTDAFRR
422	5	5330	DFDTLKVYDTQLENVEAFEGLSDFCNTFK(6)-KLPSRPPPHYPGIKR(14)	Cross-Linked	BS3	5330	Carbamidomethyl[C](25)	0.0251	0.15	0.004095	0.768919	sDYSF(1550)-sDYSF(248)/	Intra-Protein	1	1	46	9	8.48e-19	0.0334	0.823909	sDYSF	6	sDYSF	14	1550	248	1545	235	DFDTLKVYDTQLENVEAFEGLSDFCNTFK	KLPSRPPPHYPGIKR
423	6	6040	VFILYAENVHTPDTDISDAYCSAVFAGVKKR(29)-GIPLDQGSELHVVVKDHETMGR(15)	Cross-Linked	BS3	6040	Carbamidomethyl[C](21)	3.88e-06	0.154	-0.004314	-0.714118	sDYSF(79)-sDYSF(117)/	Intra-Protein	1	1	25.5	14.5	6.65e-08	6.93e-06	0.812479	sDYSF	29	sDYSF	15	79	117	51	103	VFILYAENVHTPDTDISDAYCSAVFAGVKKR	GIPLDQGSELHVVVKDHETMGR
424	4	4100	VLPKDDIECPLGWKWEDEEWSTDLNR(14)-KTDAFR(1)	Cross-Linked	BS3	4100	Carbamidomethyl[C](9)	3.49e-06	0.158	-0.004098	-0.998303	sDYSF(1040)-sDYSF(1132)/	Intra-Protein	1	1	35.5	6.5	4.93e-09	1.59e-05	0.801343	sDYSF	14	sDYSF	1	1040	1132	1027	1132	VLPKDDIECPLGWKWEDEEWSTDLNR	KTDAFR
425	6	3240	QLPGVNIKPVVKVTAAGQTKR(8)-KRSAPTSR(1)	Cross-Linked	BS3	3240	null	0.00462	0.159	0.000813	0.250624	sDYSF(285)-sDYSF(250)/	Intra-Protein	1	1	18.5	5.5	2.25e-10	0.00962	0.798603	sDYSF	8	sDYSF	1	285	250	278	250	QLPGVNIKPVVKVTAAGQTKR	KRSAPTSR
426	6	6060	NMKSYQLANISSPSLVVECGGQTVQSCVIR(3)-KDPSEDKEDIESNLLRPTGVALR(1)	Cross-Linked	BS3	6060	Carbamidomethyl[C](19);Carbamidomethyl[C](27);Oxidation[M](2)	1.95e-05	0.16	0.010052	1.65846	sDYSF(1392)-sDYSF(402)/	Intra-Protein	1	1	34	14	8.76e-16	7.35e-06	0.79588	sDYSF	3	sDYSF	1	1392	402	1390	402	NMKSYQLANISSPSLVVECGGQTVQSCVIR	KDPSEDKEDIESNLLRPTGVALR
427	5	3930	QAEAEGEGWEYASLFGWKFHLEYR(18)-KTDAFRR(1)	Cross-Linked	BS3	3930	null	2.53e-05	0.164	0.015377	3.90884	sDYSF(1125)-sDYSF(1132)/	Intra-Protein	1	1	27.5	5.5	5.21e-11	6.18e-05	0.785156	sDYSF	18	sDYSF	1	1125	1132	1108	1132	QAEAEGEGWEYASLFGWKFHLEYR	KTDAFRR
428	5	3110	KLLSDKPQDFQIR(1)-RGANYCGKNCGK(8)	Cross-Linked	BS3	3110	Carbamidomethyl[C](22);Carbamidomethyl[C](26)	5.87e-06	0.165	0.002193	0.705243	sDYSF(258)-sDYSF(873)/	Intra-Protein	1	1	15	14	5.3e-07	2.9e-05	0.782516	sDYSF	1	sDYSF	8	258	873	258	866	KLLSDKPQDFQIR	RGANYCGKNCGK
429	4	2240	LLSDKPQDFQIR(5)-ISIGKK(5)	Cross-Linked	BS3	2240	null	0.00119	0.165	0.001602	0.714451	sDYSF(263)-sDYSF(1656)/	Intra-Protein	1	1	19.5	7.5	3.59e-14	0.00606	0.782516	sDYSF	5	sDYSF	5	263	1656	259	1652	LLSDKPQDFQIR	ISIGKK
430	5	3960	KCSLDQLDDAFHPEWFVSLFEQK(1)-MPKPAKTAK(6)	Cross-Linked	BS3	3960	Carbamidomethyl[C](2);Oxidation[M](27)	0.000507	0.167	0.006994	1.76439	sDYSF(1988)-sDYSF(1984)/	Intra-Protein	1	1	30.5	9.5	3.73e-17	0.000675	0.777284	sDYSF	1	sDYSF	6	1988	1984	1988	1979	KCSLDQLDDAFHPEWFVSLFEQK	MPKPAKTAK
431	3	2220	DLSQMEALKR(9)-KTDAFRR(1)	Cross-Linked	BS3	2220	null	8.98e-09	0.168	0.000783	0.352516	sDYSF(1104)-sDYSF(1132)/	Intra-Protein	1	1	13	6	4.14e-08	1.7e-09	0.774691	sDYSF	9	sDYSF	1	1104	1132	1096	1132	DLSQMEALKR	KTDAFRR
432	6	2710	KLPSRPPPHYPGIKR(1)-VKAPVYR(2)	Cross-Linked	BS3	2710	null	7.77e-07	0.169	-0.001061	-0.39114	sDYSF(235)-sDYSF(1759)/	Intra-Protein	1	1	14.5	8.5	5.01e-06	2.49e-06	0.772113	sDYSF	1	sDYSF	2	235	1759	235	1758	KLPSRPPPHYPGIKR	VKAPVYR
433	5	4890	KDPSEDKEDIESNLLRPTGVALR(7)-GYLKTSLCVLGPGDEAPLER(4)	Cross-Linked	BS3	4890	Carbamidomethyl[C](34)	7.51e-05	0.172	0.004012	0.819693	sDYSF(408)-sDYSF(385)/	Intra-Protein	1	1	11.5	33.5	2.29e-05	7.77e-15	0.764472	sDYSF	7	sDYSF	4	408	385	402	382	KDPSEDKEDIESNLLRPTGVALR	GYLKTSLCVLGPGDEAPLER
434	7	3470	KLPSRPPPHYPGIKR(1)-KLLSDKPQDFQIR(1)	Cross-Linked	BS3	3470	null	0.000123	0.175	0.00193	0.556523	sDYSF(235)-sDYSF(258)/	Intra-Protein	1	1	12.5	10.5	0.000304	0.000197	0.756962	sDYSF	1	sDYSF	1	235	258	235	258	KLPSRPPPHYPGIKR	KLLSDKPQDFQIR
435	3	3400	EELYCPPITVKVIDNR(11)-DEPNMNPKLED(8)	Cross-Linked	BS3	3400	Carbamidomethyl[C](5);Oxidation[M](24)	0.000113	0.175	-0.000888	-0.261128	sDYSF(1451)-sDYSF(2061)/	Intra-Protein	1	1	23	13	4.46e-12	0.000273	0.756962	sDYSF	11	sDYSF	8	1451	2061	1441	2054	EELYCPPITVKVIDNR	DEPNMNPKLED
436	5	5270	KDPSEDKEDIESNLLRPTGVALR(7)-EFTGFPDPYTELNTGKGEGVAYR(16)	Cross-Linked	BS3	5270	null	1.81e-05	0.176	-0.004182	-0.79391	sDYSF(408)-sDYSF(593)/	Intra-Protein	1	1	20.5	27.5	9.62e-06	2.23e-11	0.754487	sDYSF	7	sDYSF	16	408	593	402	578	KDPSEDKEDIESNLLRPTGVALR	EFTGFPDPYTELNTGKGEGVAYR
437	3	3330	FIFPFDYLPAEQVCTIAKK(18)-TESKIPAR(4)	Cross-Linked	BS3	3330	Carbamidomethyl[C](14)	2.6e-06	0.178	0.004932	1.48297	sDYSF(1935)-sDYSF(1948)/	Intra-Protein	1	1	39	6	2.65e-15	5.49e-06	0.74958	sDYSF	18	sDYSF	4	1935	1948	1918	1945	FIFPFDYLPAEQVCTIAKK	TESKIPAR
438	5	4770	EFTGFPDPYTELNTGKGEGVAYR(16)-GRLLLSLETKLVEHSEQK(10)	Cross-Linked	BS3	4770	null	5.51e-06	0.178	0.001441	0.302386	sDYSF(593)-sDYSF(610)/	Intra-Protein	1	1	23	10	3.16e-08	2.38e-05	0.74958	sDYSF	16	sDYSF	10	593	610	578	601	EFTGFPDPYTELNTGKGEGVAYR	GRLLLSLETKLVEHSEQK
439	4	3320	GKTQEETEDPSVIGEFK(2)-QLPGVNIKPVVK(8)	Cross-Linked	BS3	3320	null	0.00154	0.179	0.002782	0.837251	sDYSF(1578)-sDYSF(285)/	Intra-Protein	1	1	11.5	11.5	0.000359	0.00465	0.747147	sDYSF	2	sDYSF	8	1578	285	1577	278	GKTQEETEDPSVIGEFK	QLPGVNIKPVVK
440	6	3240	QLPGVNIKPVVKVTAAGQTKR(12)-KRSAPTSR(1)	Cross-Linked	BS3	3240	null	0.00773	0.182	0.000813	0.250624	sDYSF(289)-sDYSF(250)/	Intra-Protein	1	1	17.5	5.5	1.97e-08	0.00958	0.739929	sDYSF	12	sDYSF	1	289	250	278	250	QLPGVNIKPVVKVTAAGQTKR	KRSAPTSR
441	4	4480	LVEHSEQKVEDLPADDILR(8)-NLVDPFVEVSFAGKMLCSK(14)	Cross-Linked	BS3	4480	Carbamidomethyl[C](39)	9.06e-07	0.188	0.003342	0.745271	sDYSF(618)-sDYSF(474)/	Intra-Protein	1	1	19	27	2.61e-06	3.63e-07	0.725842	sDYSF	8	sDYSF	14	618	474	611	461	LVEHSEQKVEDLPADDILR	NLVDPFVEVSFAGKMLCSK
442	5	5840	ISAPGGEIEEEPAGAVKPSKASDLDDYLGFLPTFGPCYINLYGSPR(17)-VEKYLR(3)	Cross-Linked	BS3	5840	Carbamidomethyl[C](37)	0.128	0.189	0.004228	0.723611	sDYSF(548)-sDYSF(632)/	Intra-Protein	1	1	54	4	2.08e-12	0.201	0.723538	sDYSF	17	sDYSF	3	548	632	532	630	ISAPGGEIEEEPAGAVKPSKASDLDDYLGFLPTFGPCYINLYGSPR	VEKYLR
443	5	6050	NMKSYQLANISSPSLVVECGGQTVQSCVIR(3)-KDPSEDKEDIESNLLRPTGVALR(1)	Cross-Linked	BS3	6050	Carbamidomethyl[C](19);Carbamidomethyl[C](27)	1.11e-08	0.193	-0.014233	-2.35449	sDYSF(1392)-sDYSF(402)/	Intra-Protein	1	1	35	12	7.54e-14	1.28e-09	0.714443	sDYSF	3	sDYSF	1	1392	402	1390	402	NMKSYQLANISSPSLVVECGGQTVQSCVIR	KDPSEDKEDIESNLLRPTGVALR
444	5	2530	RRDLSQMEALKR(11)-KTDAFRR(1)	Cross-Linked	BS3	2530	null	1.61e-05	0.194	-0.000509	-0.200918	sDYSF(1104)-sDYSF(1132)/	Intra-Protein	1	1	11.5	10.5	1.4e-06	3.88e-15	0.712198	sDYSF	11	sDYSF	1	1104	1132	1094	1132	RRDLSQMEALKR	KTDAFRR
445	6	3950	KCSLDQLDDAFHPEWFVSLFEQK(1)-MPKPAKTAK(6)	Cross-Linked	BS3	3950	Carbamidomethyl[C](2)	6.37e-05	0.194	0.002692	0.681869	sDYSF(1988)-sDYSF(1984)/	Intra-Protein	1	1	36.5	8.5	9.86e-19	5.81e-05	0.712198	sDYSF	1	sDYSF	6	1988	1984	1988	1979	KCSLDQLDDAFHPEWFVSLFEQK	MPKPAKTAK
446	6	3470	KLPSRPPPHYPGIKR(14)-KLLSDKPQDFQIR(1)	Cross-Linked	BS3	3470	null	0.000361	0.194	-0.001736	-0.500582	sDYSF(248)-sDYSF(258)/	Intra-Protein	1	1	12.5	16.5	0.00138	1.94e-19	0.712198	sDYSF	14	sDYSF	1	248	258	235	258	KLPSRPPPHYPGIKR	KLLSDKPQDFQIR
447	6	4080	QLPGVNIKPVVKVTAAGQTKR(12)-KLPSRPPPHYPGIKR(1)	Cross-Linked	BS3	4080	null	6.8e-06	0.195	0.001583	0.387572	sDYSF(289)-sDYSF(235)/	Intra-Protein	1	1	23	13	5.72e-07	2.89e-06	0.709965	sDYSF	12	sDYSF	1	289	235	278	235	QLPGVNIKPVVKVTAAGQTKR	KLPSRPPPHYPGIKR
448	3	2660	KLLSDKPQDFQIR(1)-VTAAGQTKR(8)	Cross-Linked	BS3	2660	null	2.93e-05	0.195	0.001343	0.505557	sDYSF(258)-sDYSF(297)/	Intra-Protein	1	1	18	7	2.38e-24	0.000111	0.709965	sDYSF	1	sDYSF	8	258	297	258	290	KLLSDKPQDFQIR	VTAAGQTKR
449	5	4470	EELYCPPITVKVIDNRQFGR(11)-GKTQEETEDPSVIGEFK(2)	Cross-Linked	BS3	4470	Carbamidomethyl[C](5)	0.000177	0.198	0.00472	1.05706	sDYSF(1451)-sDYSF(1578)/	Intra-Protein	1	1	15	12	0.000464	0.000112	0.703335	sDYSF	11	sDYSF	2	1451	1578	1441	1577	EELYCPPITVKVIDNRQFGR	GKTQEETEDPSVIGEFK
450	6	4510	KDPSEDKEDIESNLLRPTGVALR(7)-KWLLLSDPDDFSAGAR(1)	Cross-Linked	BS3	4510	null	1.82e-06	0.206	0.016367	3.6288	sDYSF(408)-sDYSF(366)/	Intra-Protein	1	1	16.5	20.5	3.64e-06	3.67e-10	0.686133	sDYSF	7	sDYSF	1	408	366	402	366	KDPSEDKEDIESNLLRPTGVALR	KWLLLSDPDDFSAGAR
451	5	5000	ILAGKLEMTLEIVAESEHEERPAGQGR(5)-TVKGWWPCVAEEGEKK(15)	Cross-Linked	BS3	5000	Carbamidomethyl[C](38)	0.000286	0.215	0.012762	2.55009	sDYSF(2031)-sDYSF(2025)/	Intra-Protein	1	1	19	12	0.000171	0.000719	0.667562	sDYSF	5	sDYSF	15	2031	2025	2027	2011	ILAGKLEMTLEIVAESEHEERPAGQGR	TVKGWWPCVAEEGEKK
452	5	3470	KLPSRPPPHYPGIKR(14)-KLLSDKPQDFQIR(1)	Cross-Linked	BS3	3470	null	0.0131	0.217	-0.000121	-0.034891	sDYSF(248)-sDYSF(258)/	Intra-Protein	1	1	19.5	22.5	0.0229	1.13e-09	0.66354	sDYSF	14	sDYSF	1	248	258	235	258	KLPSRPPPHYPGIKR	KLLSDKPQDFQIR
453	7	6700	TRIHKGNSPLFNETLFFNLFDSPGELFDEPIFITVVDSR(5)-QLPGVNIKPVVKVTAAGQTK(8)	Cross-Linked	BS3	6700	null	0.00221	0.222	0.013875	2.07165	sDYSF(303)-sDYSF(285)/	Intra-Protein	1	1	16	11	5.22e-08	0.0019	0.653647	sDYSF	5	sDYSF	8	303	285	299	278	TRIHKGNSPLFNETLFFNLFDSPGELFDEPIFITVVDSR	QLPGVNIKPVVKVTAAGQTK
454	5	6000	LLLSLETKLVEHSEQKVEDLPADDILR(8)-EFTGFPDPYTELNTGKGEGVAYRGR(16)	Cross-Linked	BS3	6000	null	7.4e-08	0.225	0.003955	0.658939	sDYSF(610)-sDYSF(593)/	Intra-Protein	1	1	21.5	14.5	2.29e-08	4.45e-06	0.647817	sDYSF	8	sDYSF	16	610	593	603	578	LLLSLETKLVEHSEQKVEDLPADDILR	EFTGFPDPYTELNTGKGEGVAYRGR
455	5	3470	KLPSRPPPHYPGIKR(1)-KLLSDKPQDFQIR(6)	Cross-Linked	BS3	3470	null	1.55e-06	0.228	0.002745	0.791531	sDYSF(235)-sDYSF(263)/	Intra-Protein	1	1	12.5	13.5	1.05e-06	4.11e-07	0.642065	sDYSF	1	sDYSF	6	235	263	235	258	KLPSRPPPHYPGIKR	KLLSDKPQDFQIR
456	4	3670	KWLLLSDPDDFSAGAR(1)-KLPSRPPPHYPGIKR(14)	Cross-Linked	BS3	3670	null	4.15e-06	0.233	-0.009442	-2.57206	sDYSF(366)-sDYSF(248)/	Intra-Protein	1	1	32.5	16.5	2.79e-17	9.19e-06	0.632644	sDYSF	1	sDYSF	14	366	248	366	235	KWLLLSDPDDFSAGAR	KLPSRPPPHYPGIKR
457	5	2220	LDKTESKIPAR(3)-KDAFWR(1)	Cross-Linked	BS3	2220	null	0.00255	0.236	-0.000158	-0.071261	sDYSF(1944)-sDYSF(1936)/	Intra-Protein	1	1	10.5	7.5	0.00666	0.000101	0.627088	sDYSF	3	sDYSF	1	1944	1936	1942	1936	LDKTESKIPAR	KDAFWR
458	7	3470	KLPSRPPPHYPGIKR(14)-KLLSDKPQDFQIR(1)	Cross-Linked	BS3	3470	null	0.000568	0.236	0.003737	1.07758	sDYSF(248)-sDYSF(258)/	Intra-Protein	1	1	14.5	13.5	0.000998	3.84e-15	0.627088	sDYSF	14	sDYSF	1	248	258	235	258	KLPSRPPPHYPGIKR	KLLSDKPQDFQIR
459	6	3470	KLPSRPPPHYPGIKR(14)-KLLSDKPQDFQIR(1)	Cross-Linked	BS3	3470	null	0.0575	0.24	-0.001801	-0.519325	sDYSF(248)-sDYSF(258)/	Intra-Protein	1	1	10.5	18.5	0.0601	4.68e-14	0.619789	sDYSF	14	sDYSF	1	248	258	235	258	KLPSRPPPHYPGIKR	KLLSDKPQDFQIR
460	5	2510	LDKTESKIPAR(7)-EKCGSYLEK(2)	Cross-Linked	BS3	2510	Carbamidomethyl[C](17)	0.00162	0.241	-0.000173	-0.068971	sDYSF(1948)-sDYSF(1537)/	Intra-Protein	1	1	10	8	0.0012	0.00449	0.617983	sDYSF	7	sDYSF	2	1948	1537	1942	1536	LDKTESKIPAR	EKCGSYLEK
461	6	5350	DLAAMDKDSFSDPYAIVSFLHQSQK(7)-ILAGKLEMTLEIVAESEHEER(5)	Cross-Linked	BS3	5350	null	0.0808	0.242	-0.029815	-5.57536	sDYSF(1216)-sDYSF(2031)/	Intra-Protein	1	1	30	8	1.54e-10	0.221	0.616185	sDYSF	7	sDYSF	5	1216	2031	1210	2027	DLAAMDKDSFSDPYAIVSFLHQSQK	ILAGKLEMTLEIVAESEHEER
462	4	3200	GLFKIYPLPEDPAIPMPPR(4)-LLSKFGAR(4)	Cross-Linked	BS3	3200	Oxidation[M](16)	0.000177	0.248	0.006392	2.00015	sDYSF(1597)-sDYSF(1720)/	Intra-Protein	1	1	46	8	1.72e-15	0.000589	0.605548	sDYSF	4	sDYSF	4	1597	1720	1594	1717	GLFKIYPLPEDPAIPMPPR	LLSKFGAR
463	6	4770	EFTGFPDPYTELNTGKGEGVAYRGR(16)-LLLSLETKLVEHSEQK(8)	Cross-Linked	BS3	4770	null	1.53e-05	0.25	0.005219	1.09518	sDYSF(593)-sDYSF(610)/	Intra-Protein	1	1	18	11	1.08e-06	6.89e-06	0.60206	sDYSF	16	sDYSF	8	593	610	578	603	EFTGFPDPYTELNTGKGEGVAYRGR	LLLSLETKLVEHSEQK
464	4	4080	LSVFAETYENETKLALVGNWGTTGLTYPK(13)-KTDAFR(1)	Cross-Linked	BS3	4080	null	0.000172	0.25	0.022177	5.43942	sDYSF(934)-sDYSF(1132)/	Intra-Protein	1	1	29	7	9.21e-06	0.000234	0.60206	sDYSF	13	sDYSF	1	934	1132	922	1132	LSVFAETYENETKLALVGNWGTTGLTYPK	KTDAFR
465	5	2380	RDLSQMEALKR(10)-KTDAFRR(1)	Cross-Linked	BS3	2380	null	1.13e-07	0.253	0.000726	0.305391	sDYSF(1104)-sDYSF(1132)/	Intra-Protein	1	1	19.5	7.5	7.3e-12	1.03e-07	0.596879	sDYSF	10	sDYSF	1	1104	1132	1095	1132	RDLSQMEALKR	KTDAFRR
466	6	6000	EFTGFPDPYTELNTGKGEGVAYRGRLLLSLETK(16)-LVEHSEQKVEDLPADDILR(8)	Cross-Linked	BS3	6000	null	4.66e-07	0.254	0.012901	2.14942	sDYSF(593)-sDYSF(618)/	Intra-Protein	1	1	15	15	2.06e-05	1.5e-08	0.595166	sDYSF	16	sDYSF	8	593	618	578	611	EFTGFPDPYTELNTGKGEGVAYRGRLLLSLETK	LVEHSEQKVEDLPADDILR
467	3	2240	LLSDKPQDFQIR(5)-ISIGKK(5)	Cross-Linked	BS3	2240	null	0.0206	0.254	0.00052	0.231907	sDYSF(263)-sDYSF(1656)/	Intra-Protein	1	1	15	5	5.59e-09	0.0579	0.595166	sDYSF	5	sDYSF	5	263	1656	259	1652	LLSDKPQDFQIR	ISIGKK
468	6	5330	DFDTLKVYDTQLENVEAFEGLSDFCNTFK(6)-KLPSRPPPHYPGIKR(14)	Cross-Linked	BS3	5330	Carbamidomethyl[C](25)	0.105	0.255	0.002097	0.393754	sDYSF(1550)-sDYSF(248)/	Intra-Protein	1	1	39	10	1.35e-14	0.213	0.59346	sDYSF	6	sDYSF	14	1550	248	1545	235	DFDTLKVYDTQLENVEAFEGLSDFCNTFK	KLPSRPPPHYPGIKR
469	4	2080	DLSQMEALKR(9)-KTDAFR(1)	Cross-Linked	BS3	2080	Oxidation[M](5)	0.00159	0.256	0.000768	0.369041	sDYSF(1104)-sDYSF(1132)/	Intra-Protein	1	1	12.5	3.5	0.00303	1.35e-06	0.59176	sDYSF	9	sDYSF	1	1104	1132	1096	1132	DLSQMEALKR	KTDAFR
470	6	3470	KLPSRPPPHYPGIKR(1)-KLLSDKPQDFQIR(1)	Cross-Linked	BS3	3470	null	0.00639	0.259	0.001078	0.310845	sDYSF(235)-sDYSF(258)/	Intra-Protein	1	1	12.5	14.5	0.0159	1.13e-07	0.5867	sDYSF	1	sDYSF	1	235	258	235	258	KLPSRPPPHYPGIKR	KLLSDKPQDFQIR
471	4	3790	DPNGKCDPYIKISIGKK(11)-ITLYDYDLLSKDEK(11)	Cross-Linked	BS3	3790	Carbamidomethyl[C](6)	0.00651	0.26	-0.001464	-0.386692	sDYSF(1651)-sDYSF(1702)/	Intra-Protein	1	1	13.5	13.5	0.00644	0.00925	0.585027	sDYSF	11	sDYSF	11	1651	1702	1641	1692	DPNGKCDPYIKISIGKK	ITLYDYDLLSKDEK
472	5	3770	GKTQEETEDPSVIGEFK(2)-KLPSRPPPHYPGIKR(14)	Cross-Linked	BS3	3770	null	0.00036	0.267	-0.005415	-1.43482	sDYSF(1578)-sDYSF(248)/	Intra-Protein	1	1	27	12	1.79e-18	0.00139	0.573489	sDYSF	2	sDYSF	14	1578	248	1577	235	GKTQEETEDPSVIGEFK	KLPSRPPPHYPGIKR
473	6	3400	EKPAIHHIPGFEVQETSR(2)-DLSQMEALKR(9)	Cross-Linked	BS3	3400	null	0.00201	0.267	0.000653	0.191904	sDYSF(1328)-sDYSF(1104)/	Intra-Protein	1	1	25.5	5.5	5.29e-11	0.00479	0.573489	sDYSF	2	sDYSF	9	1328	1104	1327	1096	EKPAIHHIPGFEVQETSR	DLSQMEALKR
474	5	3470	KLPSRPPPHYPGIKR(14)-KLLSDKPQDFQIR(1)	Cross-Linked	BS3	3470	null	0.000282	0.274	-0.000861	-0.248273	sDYSF(248)-sDYSF(258)/	Intra-Protein	1	1	14.5	20.5	0.000595	2e-12	0.562249	sDYSF	14	sDYSF	1	248	258	235	258	KLPSRPPPHYPGIKR	KLLSDKPQDFQIR
475	6	4170	FIFPFDYLPAEQVCTIAKK(18)-KLPSRPPPHYPGIKR(14)	Cross-Linked	BS3	4170	Carbamidomethyl[C](14)	0.00316	0.281	0.002337	0.5608	sDYSF(1935)-sDYSF(248)/	Intra-Protein	1	1	23	12	3.35e-10	0.00357	0.551294	sDYSF	18	sDYSF	14	1935	248	1918	235	FIFPFDYLPAEQVCTIAKK	KLPSRPPPHYPGIKR
476	5	3960	KCSLDQLDDAFHPEWFVSLFEQK(1)-MPKPAKTAK(6)	Cross-Linked	BS3	3960	Carbamidomethyl[C](2);Oxidation[M](27)	0.00139	0.293	0.006994	1.76439	sDYSF(1988)-sDYSF(1984)/	Intra-Protein	1	1	30.5	10.5	8.13e-19	0.00284	0.533132	sDYSF	1	sDYSF	6	1988	1984	1988	1979	KCSLDQLDDAFHPEWFVSLFEQK	MPKPAKTAK
477	5	3470	KLPSRPPPHYPGIKR(14)-KLLSDKPQDFQIR(1)	Cross-Linked	BS3	3470	null	0.000483	0.293	-0.000988	-0.284893	sDYSF(248)-sDYSF(258)/	Intra-Protein	1	1	15.5	22.5	0.000461	3.11e-12	0.533132	sDYSF	14	sDYSF	1	248	258	235	258	KLPSRPPPHYPGIKR	KLLSDKPQDFQIR
478	4	2160	FLGEAKVPLR(6)-KTDAFRR(1)	Cross-Linked	BS3	2160	null	0.0216	0.3	0.000588	0.272193	sDYSF(132)-sDYSF(1132)/	Intra-Protein	1	1	14.5	6.5	0.000543	0.0501	0.522879	sDYSF	6	sDYSF	1	132	1132	127	1132	FLGEAKVPLR	KTDAFRR
479	5	2780	KLPSRPPPHYPGIKR(1)-KRSAPTSR(1)	Cross-Linked	BS3	2780	null	0.000114	0.301	-0.001628	-0.585065	sDYSF(235)-sDYSF(250)/	Intra-Protein	1	1	24.5	5.5	7.95e-08	0.000137	0.521434	sDYSF	1	sDYSF	1	235	250	235	250	KLPSRPPPHYPGIKR	KRSAPTSR
480	7	4090	QAEAEGEGWEYASLFGWKFHLEYR(18)-KTDAFRRR(1)	Cross-Linked	BS3	4090	null	0.0118	0.303	0.024065	5.88386	sDYSF(1125)-sDYSF(1132)/	Intra-Protein	1	1	22.5	4.5	6.82e-12	0.0191	0.518557	sDYSF	18	sDYSF	1	1125	1132	1108	1132	QAEAEGEGWEYASLFGWKFHLEYR	KTDAFRRR
481	5	5270	KDPSEDKEDIESNLLRPTGVALR(1)-EFTGFPDPYTELNTGKGEGVAYR(16)	Cross-Linked	BS3	5270	null	0.00097	0.305	-0.007876	-1.49518	sDYSF(402)-sDYSF(593)/	Intra-Protein	1	1	11.5	23.5	0.00119	1.42e-11	0.5157	sDYSF	1	sDYSF	16	402	593	402	578	KDPSEDKEDIESNLLRPTGVALR	EFTGFPDPYTELNTGKGEGVAYR
482	4	1860	LLSKFGAR(4)-VKAPVYR(2)	Cross-Linked	BS3	1860	null	0.000489	0.317	0.000222	0.119284	sDYSF(1720)-sDYSF(1759)/	Intra-Protein	1	1	6.5	7.5	0.00147	1.1e-07	0.498941	sDYSF	4	sDYSF	2	1720	1759	1717	1758	LLSKFGAR	VKAPVYR
483	4	2700	KLPSRPPPHYPGIKR(14)-LDKTESK(3)	Cross-Linked	BS3	2700	null	1.03e-07	0.318	0.000225	0.083317	sDYSF(248)-sDYSF(1944)/	Intra-Protein	1	1	24	8	1.03e-08	3.05e-11	0.497573	sDYSF	14	sDYSF	3	248	1944	235	1942	KLPSRPPPHYPGIKR	LDKTESK
484	3	2260	DEPNMNPKLED(8)-LDKTESK(3)	Cross-Linked	BS3	2260	null	2.51e-06	0.32	0.002635	1.16641	sDYSF(2061)-sDYSF(1944)/	Intra-Protein	1	1	13	6	2.36e-07	1.93e-06	0.49485	sDYSF	8	sDYSF	3	2061	1944	2054	1942	DEPNMNPKLED	LDKTESK
485	6	3470	KLPSRPPPHYPGIKR(14)-KLLSDKPQDFQIR(1)	Cross-Linked	BS3	3470	null	0.0116	0.324	-0.002122	-0.611886	sDYSF(248)-sDYSF(258)/	Intra-Protein	1	1	13.5	15.5	0.0345	1.09e-09	0.489455	sDYSF	14	sDYSF	1	248	258	235	258	KLPSRPPPHYPGIKR	KLLSDKPQDFQIR
486	5	4090	QAEAEGEGWEYASLFGWKFHLEYR(18)-KTDAFRRR(1)	Cross-Linked	BS3	4090	null	6.62e-06	0.324	0.023078	5.64254	sDYSF(1125)-sDYSF(1132)/	Intra-Protein	1	1	26.5	7.5	1.95e-14	3.14e-06	0.489455	sDYSF	18	sDYSF	1	1125	1132	1108	1132	QAEAEGEGWEYASLFGWKFHLEYR	KTDAFRRR
487	5	3470	KLPSRPPPHYPGIKR(14)-KLLSDKPQDFQIR(1)	Cross-Linked	BS3	3470	null	0.123	0.329	-0.000988	-0.284893	sDYSF(248)-sDYSF(258)/	Intra-Protein	1	1	14.5	19.5	0.265	4.47e-07	0.482804	sDYSF	14	sDYSF	1	248	258	235	258	KLPSRPPPHYPGIKR	KLLSDKPQDFQIR
488	6	3470	KLPSRPPPHYPGIKR(14)-KLLSDKPQDFQIR(1)	Cross-Linked	BS3	3470	null	0.00784	0.332	0.00299	0.862177	sDYSF(248)-sDYSF(258)/	Intra-Protein	1	1	11.5	10.5	0.00698	5.96e-16	0.478862	sDYSF	14	sDYSF	1	248	258	235	258	KLPSRPPPHYPGIKR	KLLSDKPQDFQIR
489	4	2830	CDPYIKISIGKK(6)-AFGLQPKDPNGK(7)	Cross-Linked	BS3	2830	Carbamidomethyl[C](1)	0.00212	0.334	0.000806	0.284754	sDYSF(1651)-sDYSF(1640)/	Intra-Protein	1	1	11.5	8.5	0.00238	0.00192	0.476254	sDYSF	6	sDYSF	7	1651	1640	1646	1634	CDPYIKISIGKK	AFGLQPKDPNGK
490	7	4080	QLPGVNIKPVVKVTAAGQTKR(12)-KLPSRPPPHYPGIKR(14)	Cross-Linked	BS3	4080	null	0.00905	0.339	0.002161	0.529086	sDYSF(289)-sDYSF(248)/	Intra-Protein	1	1	20.5	15.5	2.73e-06	0.00832	0.4698	sDYSF	12	sDYSF	14	289	248	278	235	QLPGVNIKPVVKVTAAGQTKR	KLPSRPPPHYPGIKR
491	7	3470	LPSRPPPHYPGIKRK(13)-KLLSDKPQDFQIR(1)	Cross-Linked	BS3	3470	null	0.0536	0.344	0.002635	0.759812	sDYSF(248)-sDYSF(258)/	Intra-Protein	1	1	12	13	0.0684	1.79e-13	0.463442	sDYSF	13	sDYSF	1	248	258	236	258	LPSRPPPHYPGIKRK	KLLSDKPQDFQIR
492	5	4420	GKTQEETEDPSVIGEFKGLFK(2)-EELYCPPITVKVIDNR(11)	Cross-Linked	BS3	4420	Carbamidomethyl[C](29)	0.000175	0.345	0.00065	0.146984	sDYSF(1578)-sDYSF(1451)/	Intra-Protein	1	1	16	13	0.00295	0.000118	0.462181	sDYSF	2	sDYSF	11	1578	1451	1577	1441	GKTQEETEDPSVIGEFKGLFK	EELYCPPITVKVIDNR
493	4	2060	QLPGVNIKPVVK(8)-KILAGK(1)	Cross-Linked	BS3	2060	null	0.0169	0.363	-0.001233	-0.599037	sDYSF(285)-sDYSF(2026)/	Intra-Protein	1	1	9.5	5.5	0.0399	0.00655	0.440093	sDYSF	8	sDYSF	1	285	2026	278	2026	QLPGVNIKPVVK	KILAGK
494	5	4100	VLPKDDIECPLGWKWEDEEWSTDLNR(14)-KTDAFR(1)	Cross-Linked	BS3	4100	Carbamidomethyl[C](9)	0.000171	0.366	-0.001472	-0.35859	sDYSF(1040)-sDYSF(1132)/	Intra-Protein	1	1	28.5	6.5	3.18e-09	0.000299	0.436519	sDYSF	14	sDYSF	1	1040	1132	1027	1132	VLPKDDIECPLGWKWEDEEWSTDLNR	KTDAFR
495	6	3950	MEPLEKTGPAAVFALEGALGGVMDDK(6)-FLGEAKVPLR(6)	Cross-Linked	BS3	3950	Oxidation[M](1);Oxidation[M](23)	0.03	0.367	-0.004763	-1.20734	sDYSF(1150)-sDYSF(132)/	Intra-Protein	1	1	37	11	1.13e-10	0.0974	0.435334	sDYSF	6	sDYSF	6	1150	132	1145	127	MEPLEKTGPAAVFALEGALGGVMDDK	FLGEAKVPLR
496	6	3470	KLPSRPPPHYPGIKR(1)-KLLSDKPQDFQIR(1)	Cross-Linked	BS3	3470	null	0.00066	0.37	0.001146	0.330453	sDYSF(235)-sDYSF(258)/	Intra-Protein	1	1	9.5	13.5	0.000717	8.24e-08	0.431798	sDYSF	1	sDYSF	1	235	258	235	258	KLPSRPPPHYPGIKR	KLLSDKPQDFQIR
497	5	5480	EFTGFPDPYTELNTGKGEGVAYRGR(16)-KDPSEDKEDIESNLLRPTGVALR(7)	Cross-Linked	BS3	5480	null	2.58e-07	0.371	0.011346	2.07016	sDYSF(593)-sDYSF(408)/	Intra-Protein	1	1	17.5	20.5	1.1e-06	1.17e-05	0.430626	sDYSF	16	sDYSF	7	593	408	578	402	EFTGFPDPYTELNTGKGEGVAYRGR	KDPSEDKEDIESNLLRPTGVALR
498	5	4890	RRMEPLEKTGPAAVFALEGALGGVMDDK(8)-KWLLLSDPDDFSAGAR(1)	Cross-Linked	BS3	4890	null	0.0238	0.376	-0.004639	-0.949353	sDYSF(1150)-sDYSF(366)/	Intra-Protein	1	1	8	18	0.0495	3.22e-08	0.424812	sDYSF	8	sDYSF	1	1150	366	1143	366	RRMEPLEKTGPAAVFALEGALGGVMDDK	KWLLLSDPDDFSAGAR
499	5	2340	GAHFCLKVFR(7)-VEKYLRR(3)	Cross-Linked	BS3	2340	Carbamidomethyl[C](5)	1.43e-05	0.377	0.000407	0.174283	sDYSF(431)-sDYSF(632)/	Intra-Protein	1	1	19.5	5.5	9.19e-13	6.22e-06	0.423659	sDYSF	7	sDYSF	3	431	632	425	630	GAHFCLKVFR	VEKYLRR
500	5	4350	AVDEQGWEYSITIPPERKPK(18)-HWVPAEKMYYTHRR(7)	Cross-Linked	BS3	4350	null	0.000827	0.378	0.000448	0.102889	sDYSF(1070)-sDYSF(1079)/	Intra-Protein	1	1	15	7	4.34e-09	0.00149	0.422508	sDYSF	18	sDYSF	7	1070	1079	1053	1073	AVDEQGWEYSITIPPERKPK	HWVPAEKMYYTHRR
501	5	3420	EKPAIHHIPGFEVQETSR(2)-DLSQMEALKR(9)	Cross-Linked	BS3	3420	Oxidation[M](26)	0.0023	0.379	-0.003638	-1.06413	sDYSF(1328)-sDYSF(1104)/	Intra-Protein	1	1	22.5	9.5	2.46e-10	0.00326	0.421361	sDYSF	2	sDYSF	9	1328	1104	1327	1096	EKPAIHHIPGFEVQETSR	DLSQMEALKR
502	5	2220	LDKTESKIPAR(3)-KDAFWR(1)	Cross-Linked	BS3	2220	null	0.00034	0.38	-7.3e-05	-0.032924	sDYSF(1944)-sDYSF(1936)/	Intra-Protein	1	1	9.5	5.5	0.000588	4.76e-05	0.420216	sDYSF	3	sDYSF	1	1944	1936	1942	1936	LDKTESKIPAR	KDAFWR
503	6	4080	QLPGVNIKPVVKVTAAGQTKR(12)-KLPSRPPPHYPGIKR(14)	Cross-Linked	BS3	4080	null	0.0295	0.385	-0.001797	-0.439966	sDYSF(289)-sDYSF(248)/	Intra-Protein	1	1	21.5	12.5	1.95e-07	0.0386	0.414539	sDYSF	12	sDYSF	14	289	248	278	235	QLPGVNIKPVVKVTAAGQTKR	KLPSRPPPHYPGIKR
504	4	1890	VTAAGQTKR(8)-LDKTESK(3)	Cross-Linked	BS3	1890	null	3.67e-05	0.386	-0.002324	-1.23026	sDYSF(297)-sDYSF(1944)/	Intra-Protein	1	1	9.5	4.5	0.000247	4.06e-05	0.413413	sDYSF	8	sDYSF	3	297	1944	290	1942	VTAAGQTKR	LDKTESK
505	4	2260	DPNGKCDPYIK(5)-LDKTESK(3)	Cross-Linked	BS3	2260	Carbamidomethyl[C](6)	0.144	0.388	0.000255	0.112627	sDYSF(1645)-sDYSF(1944)/	Intra-Protein	1	1	11.5	6.5	0.0203	0.44	0.411168	sDYSF	5	sDYSF	3	1645	1944	1641	1942	DPNGKCDPYIK	LDKTESK
506	4	3470	KLPSRPPPHYPGIKR(14)-KLLSDKPQDFQIR(1)	Cross-Linked	BS3	3470	null	3.97e-06	0.389	-0.002842	-0.819501	sDYSF(248)-sDYSF(258)/	Intra-Protein	1	1	14.5	30.5	4.61e-05	9.37e-16	0.41005	sDYSF	14	sDYSF	1	248	258	235	258	KLPSRPPPHYPGIKR	KLLSDKPQDFQIR
507	5	4570	VLPKDDIECPLGWKWEDEEWSTDLNR(14)-DLSQMEALKR(9)	Cross-Linked	BS3	4570	Carbamidomethyl[C](9);Oxidation[M](34)	0.00262	0.393	0.00768	1.67899	sDYSF(1040)-sDYSF(1104)/	Intra-Protein	1	1	27.5	8.5	3.75e-09	0.00511	0.405607	sDYSF	14	sDYSF	9	1040	1104	1027	1096	VLPKDDIECPLGWKWEDEEWSTDLNR	DLSQMEALKR
508	3	2630	KLLSDKPQDFQIR(1)-KRSAPTSR(1)	Cross-Linked	BS3	2630	null	9.2e-09	0.394	-0.00074	-0.281641	sDYSF(258)-sDYSF(250)/	Intra-Protein	1	1	17.5	5.5	5.84e-05	4.86e-11	0.404504	sDYSF	1	sDYSF	1	258	250	258	250	KLLSDKPQDFQIR	KRSAPTSR
509	5	2700	KLPSRPPPHYPGIKR(14)-LDKTESK(3)	Cross-Linked	BS3	2700	null	3.19e-06	0.4	-0.000873	-0.323271	sDYSF(248)-sDYSF(1944)/	Intra-Protein	1	1	16	8	2.87e-06	1.15e-11	0.39794	sDYSF	14	sDYSF	3	248	1944	235	1942	KLPSRPPPHYPGIKR	LDKTESK
510	6	4780	DLAAMDKDSFSDPYAIVSFLHQSQK(7)-EKCGSYLEKDFDTLK(9)	Cross-Linked	BS3	4780	Carbamidomethyl[C](31)	0.418	0.401	9.6e-05	0.02007	sDYSF(1216)-sDYSF(1544)/	Intra-Protein	1	1	28.5	5.5	3.48e-12	1	0.396856	sDYSF	7	sDYSF	9	1216	1544	1210	1536	DLAAMDKDSFSDPYAIVSFLHQSQK	EKCGSYLEKDFDTLK
511	4	5270	KDPSEDKEDIESNLLRPTGVALR(7)-EFTGFPDPYTELNTGKGEGVAYR(16)	Cross-Linked	BS3	5270	null	0.0281	0.401	-0.00688	-1.3061	sDYSF(408)-sDYSF(593)/	Intra-Protein	1	1	12	34	1.72e-06	4.93e-10	0.396856	sDYSF	7	sDYSF	16	408	593	402	578	KDPSEDKEDIESNLLRPTGVALR	EFTGFPDPYTELNTGKGEGVAYR
512	5	4890	KDPSEDKEDIESNLLRPTGVALR(1)-GYLKTSLCVLGPGDEAPLER(4)	Cross-Linked	BS3	4890	Carbamidomethyl[C](34)	0.00688	0.403	0.004608	0.941462	sDYSF(402)-sDYSF(385)/	Intra-Protein	1	1	11.5	18.5	0.00996	4.11e-05	0.394695	sDYSF	1	sDYSF	4	402	385	402	382	KDPSEDKEDIESNLLRPTGVALR	GYLKTSLCVLGPGDEAPLER
513	5	5190	PLYSPLQPDIEQGKLQMWVDLFPK(14)-LVEHSEQKVEDLPADDILR(8)	Cross-Linked	BS3	5190	null	0.0176	0.404	-0.001022	-0.197081	sDYSF(1829)-sDYSF(618)/	Intra-Protein	1	1	10.5	11.5	0.00173	0.0436	0.393619	sDYSF	14	sDYSF	8	1829	618	1816	611	PLYSPLQPDIEQGKLQMWVDLFPK	LVEHSEQKVEDLPADDILR
514	4	3470	KLPSRPPPHYPGIKR(14)-KLLSDKPQDFQIR(6)	Cross-Linked	BS3	3470	null	2.64e-05	0.413	0.00459	1.32354	sDYSF(248)-sDYSF(263)/	Intra-Protein	1	1	13	23	0.000112	3.53e-20	0.38405	sDYSF	14	sDYSF	6	248	263	235	258	KLPSRPPPHYPGIKR	KLLSDKPQDFQIR
515	7	6000	LLLSLETKLVEHSEQKVEDLPADDILR(8)-EFTGFPDPYTELNTGKGEGVAYRGR(16)	Cross-Linked	BS3	6000	null	2.13e-05	0.418	0.007399	1.23274	sDYSF(610)-sDYSF(593)/	Intra-Protein	1	1	12.5	13.5	2.85e-05	2.9e-05	0.378824	sDYSF	8	sDYSF	16	610	593	603	578	LLLSLETKLVEHSEQKVEDLPADDILR	EFTGFPDPYTELNTGKGEGVAYRGR
516	4	2360	QLPGVNIKPVVK(8)-VTAAGQTKR(8)	Cross-Linked	BS3	2360	null	0.000393	0.422	0.001636	0.693102	sDYSF(285)-sDYSF(297)/	Intra-Protein	1	1	13.5	6.5	7.83e-06	0.00102	0.374688	sDYSF	8	sDYSF	8	285	297	278	290	QLPGVNIKPVVK	VTAAGQTKR
517	5	5270	KDPSEDKEDIESNLLRPTGVALR(7)-EFTGFPDPYTELNTGKGEGVAYR(16)	Cross-Linked	BS3	5270	null	0.0113	0.422	-0.004497	-0.853709	sDYSF(408)-sDYSF(593)/	Intra-Protein	1	1	9.5	26.5	0.017	7.43e-11	0.374688	sDYSF	7	sDYSF	16	408	593	402	578	KDPSEDKEDIESNLLRPTGVALR	EFTGFPDPYTELNTGKGEGVAYR
518	5	4560	VLPKDDIECPLGWKWEDEEWSTDLNR(14)-DLSQMEALKR(9)	Cross-Linked	BS3	4560	Carbamidomethyl[C](9)	0.00138	0.423	0.001396	0.306262	sDYSF(1040)-sDYSF(1104)/	Intra-Protein	1	1	18.5	8.5	9.27e-07	0.00219	0.37366	sDYSF	14	sDYSF	9	1040	1104	1027	1096	VLPKDDIECPLGWKWEDEEWSTDLNR	DLSQMEALKR
519	5	5270	KDPSEDKEDIESNLLRPTGVALR(7)-EFTGFPDPYTELNTGKGEGVAYR(16)	Cross-Linked	BS3	5270	null	0.00957	0.425	-0.004182	-0.79391	sDYSF(408)-sDYSF(593)/	Intra-Protein	1	1	11.5	29.5	0.00359	4.38e-09	0.371611	sDYSF	7	sDYSF	16	408	593	402	578	KDPSEDKEDIESNLLRPTGVALR	EFTGFPDPYTELNTGKGEGVAYR
520	6	4900	TSLCVLGPGDEAPLERKDPSEDK(17)-DVILDDLSLTGEKMSDIYVK(13)	Cross-Linked	BS3	4900	Carbamidomethyl[C](4)	0.0142	0.433	-0.009848	-2.00798	sDYSF(402)-sDYSF(1881)/	Intra-Protein	1	1	8.5	12.5	0.0447	5.53e-05	0.363512	sDYSF	17	sDYSF	13	402	1881	386	1869	TSLCVLGPGDEAPLERKDPSEDK	DVILDDLSLTGEKMSDIYVK
521	6	4430	EFTGFPDPYTELNTGKGEGVAYR(16)-KLPSRPPPHYPGIKR(1)	Cross-Linked	BS3	4430	null	0.121	0.434	-0.007971	-1.80002	sDYSF(593)-sDYSF(235)/	Intra-Protein	1	1	19.5	8.5	3.62e-05	0.27	0.36251	sDYSF	16	sDYSF	1	593	235	578	235	EFTGFPDPYTELNTGKGEGVAYR	KLPSRPPPHYPGIKR
522	5	4310	QLPGVNIKPVVKVTAAGQTKR(12)-ISAPGGEIEEEPAGAVKPSK(17)	Cross-Linked	BS3	4310	null	1.53e-05	0.449	-0.00347	-0.805591	sDYSF(289)-sDYSF(548)/	Intra-Protein	1	1	15	16	9.3e-05	9.86e-07	0.347754	sDYSF	12	sDYSF	17	289	548	278	532	QLPGVNIKPVVKVTAAGQTKR	ISAPGGEIEEEPAGAVKPSK
523	5	5840	ISAPGGEIEEEPAGAVKPSKASDLDDYLGFLPTFGPCYINLYGSPR(20)-VEKYLR(3)	Cross-Linked	BS3	5840	Carbamidomethyl[C](37)	0.055	0.452	0.004228	0.723611	sDYSF(551)-sDYSF(632)/	Intra-Protein	1	1	54	4	4.86e-12	0.0627	0.344862	sDYSF	20	sDYSF	3	551	632	532	630	ISAPGGEIEEEPAGAVKPSKASDLDDYLGFLPTFGPCYINLYGSPR	VEKYLR
524	6	3260	KLPSRPPPHYPGIKR(14)-RGANYCGKNCGK(8)	Cross-Linked	BS3	3260	Carbamidomethyl[C](24);Carbamidomethyl[C](28)	0.000346	0.453	-0.001914	-0.586271	sDYSF(248)-sDYSF(873)/	Intra-Protein	1	1	17	15	0.000424	8.62e-07	0.343902	sDYSF	14	sDYSF	8	248	873	235	866	KLPSRPPPHYPGIKR	RGANYCGKNCGK
525	3	1860	LLSKFGAR(4)-VKAPVYR(2)	Cross-Linked	BS3	1860	null	4.21e-05	0.459	0.001948	1.04669	sDYSF(1720)-sDYSF(1759)/	Intra-Protein	1	1	7.5	9.5	5.39e-05	1.58e-08	0.338187	sDYSF	4	sDYSF	2	1720	1759	1717	1758	LLSKFGAR	VKAPVYR
526	6	3140	LPSRPPPHYPGIKRK(13)-LDKTESKIPAR(3)	Cross-Linked	BS3	3140	null	0.017	0.46	-0.003995	-1.27319	sDYSF(248)-sDYSF(1944)/	Intra-Protein	1	1	10	12	0.0527	6.4e-05	0.337242	sDYSF	13	sDYSF	3	248	1944	236	1942	LPSRPPPHYPGIKRK	LDKTESKIPAR
527	4	2080	DLSQMEALKR(9)-KTDAFR(1)	Cross-Linked	BS3	2080	Oxidation[M](5)	1.15e-10	0.461	0.000595	0.285911	sDYSF(1104)-sDYSF(1132)/	Intra-Protein	1	1	17.5	6.5	1.01e-10	3.17e-17	0.336299	sDYSF	9	sDYSF	1	1104	1132	1096	1132	DLSQMEALKR	KTDAFR
528	4	3010	KNPNFDICTLFMEVMLPR(1)-ISIGKK(5)	Cross-Linked	BS3	3010	Carbamidomethyl[C](8)	0.00895	0.463	0.008605	2.8611	sDYSF(1423)-sDYSF(1656)/	Intra-Protein	1	1	41	4	2.13e-21	0.0172	0.334419	sDYSF	1	sDYSF	5	1423	1656	1423	1652	KNPNFDICTLFMEVMLPR	ISIGKK
529	5	5010	DDIECPLGWKWEDEEWSTDLNR(10)-EKPAIHHIPGFEVQETSR(2)	Cross-Linked	BS3	5010	Carbamidomethyl[C](5)	5.1e-05	0.469	0.017501	3.49647	sDYSF(1040)-sDYSF(1328)/	Intra-Protein	1	1	22.5	14.5	1.96e-07	9.88e-05	0.328827	sDYSF	10	sDYSF	2	1040	1328	1031	1327	DDIECPLGWKWEDEEWSTDLNR	EKPAIHHIPGFEVQETSR
530	4	3330	FIFPFDYLPAEQVCTIAKK(18)-TESKIPAR(4)	Cross-Linked	BS3	3330	Carbamidomethyl[C](14)	7.71e-07	0.474	0.004048	1.21717	sDYSF(1935)-sDYSF(1948)/	Intra-Protein	1	1	22	11	8.21e-07	1.01e-06	0.324222	sDYSF	18	sDYSF	4	1935	1948	1918	1945	FIFPFDYLPAEQVCTIAKK	TESKIPAR
531	6	4070	HRQAEAEGEGWEYASLFGWKFHLEYR(20)-KTDAFR(1)	Cross-Linked	BS3	4070	null	5.34e-05	0.485	0.003599	0.884067	sDYSF(1125)-sDYSF(1132)/	Intra-Protein	1	1	30.5	4.5	5.02e-07	0.000105	0.314258	sDYSF	20	sDYSF	1	1125	1132	1106	1132	HRQAEAEGEGWEYASLFGWKFHLEYR	KTDAFR

## Sheet: Closed_state_Ca_Ca_distances
protein1	chain1	res1	protein2	chain2	res2	Euclidean distance Cα-Cα (Å)
Dysferlin(1-2017)	E	250	Dysferlin(1-2017)	C	1531	18.7197
Dysferlin(1-2017)	G	1889	Dysferlin(1-2017)	G	1897	5.30904
Dysferlin(1-2017)	G	1889	Dysferlin(1-2017)	G	1979	24.365
Dysferlin(1-2017)	C	1404	Dysferlin(1-2017)	C	1531	14.3414
Dysferlin(1-2017)	H	1490	Dysferlin(1-2017)	G	1889	30.6552
Dysferlin(1-2017)	G	1889	Dysferlin(1-2017)	G	1901	12.5419
Dysferlin(1-2017)	G	1841	Dysferlin(1-2017)	G	1853	4.3673
Dysferlin(1-2017)	H	1490	Dysferlin(1-2017)	G	1901	32.824
Dysferlin(1-2017)	C	1345	Dysferlin(1-2017)	C	1531	15.0097
Dysferlin(1-2017)	H	1490	Dysferlin(1-2017)	G	1897	25.7564
Dysferlin(1-2017)	H	1598	Dysferlin(1-2017)	G	1897	16.9208
Dysferlin(1-2017)	D	993	Dysferlin(1-2017)	A	1085	32.8317
Dysferlin(1-2017)	H	1598	Dysferlin(1-2017)	G	1889	18.4842
Dysferlin(1-2017)	G	1888	Dysferlin(1-2017)	G	1897	4.53555
Dysferlin(1-2017)	H	1490	Dysferlin(1-2017)	G	1888	28.7373
Dysferlin(1-2017)	E	319	Dysferlin(1-2017)	E	338	5.45787
Dysferlin(1-2017)	A	1078	Dysferlin(1-2017)	A	1085	14.6385
Dysferlin(1-2017)	H	1644	Dysferlin(1-2017)	H	1658	14.0509
Dysferlin(1-2017)	C	1526	Dysferlin(1-2017)	C	1531	13.8005
Dysferlin(1-2017)	A	842	Dysferlin(1-2017)	C	1531	23.5636
Dysferlin(1-2017)	E	250	Dysferlin(1-2017)	H	1658	22.4992
Dysferlin(1-2017)	A	1169	Dysferlin(1-2017)	C	1531	22.8173
Dysferlin(1-2017)	E	250	Dysferlin(1-2017)	H	1644	18.2016
Dysferlin(1-2017)	E	338	Dysferlin(1-2017)	C	1531	23.555
Dysferlin(1-2017)	G	1978	Dysferlin(1-2017)	G	1984	17.3997
Dysferlin(1-2017)	A	1169	Dysferlin(1-2017)	C	1404	20.5744
Dysferlin(1-2017)	H	1490	Dysferlin(1-2017)	H	1503	17.3213
Dysferlin(1-2017)	E	338	Dysferlin(1-2017)	A	546	21.5872
Dysferlin(1-2017)	G	1888	Dysferlin(1-2017)	G	1901	9.50121
Dysferlin(1-2017)	E	250	Dysferlin(1-2017)	C	1345	17.5707
Dysferlin(1-2017)	A	384	Dysferlin(1-2017)	A	585	15.7389
Dysferlin(1-2017)	A	546	Dysferlin(1-2017)	A	842	9.90587
Dysferlin(1-2017)	H	1712	Dysferlin(1-2017)	H	1726	10.9141
Dysferlin(1-2017)	E	250	Dysferlin(1-2017)	C	1526	18.8386
Dysferlin(1-2017)	C	1376	Dysferlin(1-2017)	H	1609	14.6949
Dysferlin(1-2017)	E	242	Dysferlin(1-2017)	H	1655	29.5325
Dysferlin(1-2017)	G	1937	Dysferlin(1-2017)	G	1941	7.92655
Dysferlin(1-2017)	E	242	Dysferlin(1-2017)	C	1526	23.8758
Dysferlin(1-2017)	A	887	Dysferlin(1-2017)	A	1085	10.6856
Dysferlin(1-2017)	H	1598	Dysferlin(1-2017)	G	1888	20.6906
Dysferlin(1-2017)	H	1673	Dysferlin(1-2017)	H	1712	18.3262
Dysferlin(1-2017)	C	1345	Dysferlin(1-2017)	C	1526	12.7456
Dysferlin(1-2017)	A	427	Dysferlin(1-2017)	A	571	11.452
Dysferlin(1-2017)	A	802	Dysferlin(1-2017)	D	1023	21.81
Dysferlin(1-2017)	E	250	Dysferlin(1-2017)	H	1655	28.3599
Dysferlin(1-2017)	E	238	Dysferlin(1-2017)	C	1531	24.0676
Dysferlin(1-2017)	E	319	Dysferlin(1-2017)	A	546	22.6333
Dysferlin(1-2017)	C	1550	Dysferlin(1-2017)	H	1673	18.0178
Dysferlin(1-2017)	D	979	Dysferlin(1-2017)	D	1023	12.4028
Dysferlin(1-2017)	H	1593	Dysferlin(1-2017)	H	1604	17.2498
Dysferlin(1-2017)	E	242	Dysferlin(1-2017)	H	1658	23.876
Dysferlin(1-2017)	D	1023	Dysferlin(1-2017)	D	1032	18.0621
Dysferlin(1-2017)	A	412	Dysferlin(1-2017)	A	436	9.55059
Dysferlin(1-2017)	D	1032	Dysferlin(1-2017)	A	1169	32.3846
Dysferlin(1-2017)	A	546	Dysferlin(1-2017)	A	563	30.1626
Dysferlin(1-2017)	A	910	Dysferlin(1-2017)	A	1085	25.9799
Dysferlin(1-2017)	A	432	Dysferlin(1-2017)	A	571	12.2264
Dysferlin(1-2017)	G	1937	Dysferlin(1-2017)	G	1966	7.07704
Dysferlin(1-2017)	H	1598	Dysferlin(1-2017)	G	1901	29.8197
Dysferlin(1-2017)	D	979	Dysferlin(1-2017)	A	1085	13.0634
Dysferlin(1-2017)	A	458	Dysferlin(1-2017)	C	1345	41.7362
Dysferlin(1-2017)	E	250	Dysferlin(1-2017)	A	484	33.2632
Dysferlin(1-2017)	A	546	Dysferlin(1-2017)	A	571	28.2464
Dysferlin(1-2017)	A	432	Dysferlin(1-2017)	A	458	22.9846
Dysferlin(1-2017)	E	250	Dysferlin(1-2017)	G	1897	49.671
Dysferlin(1-2017)	H	1593	Dysferlin(1-2017)	G	1853	28.1552
Dysferlin(1-2017)	E	238	Dysferlin(1-2017)	E	256	4.11833
Dysferlin(1-2017)	A	432	Dysferlin(1-2017)	H	1490	92.8677
Dysferlin(1-2017)	E	338	Dysferlin(1-2017)	A	413	45.4274
Dysferlin(1-2017)	E	319	Dysferlin(1-2017)	C	1531	26.3162
Dysferlin(1-2017)	A	1169	Dysferlin(1-2017)	H	1497	79.5901

## Sheet: Loose_state_Ca_Ca_distances
protein1	chain1	res1	protein2	chain2	res2	Euclidean distance Cα-Cα (Å)
Dysferlin(1-2017)	E	250	Dysferlin(1-2017)	C	1531	20.1131
Dysferlin(1-2017)	C	1404	Dysferlin(1-2017)	C	1531	14.3408
Dysferlin(1-2017)	C	1345	Dysferlin(1-2017)	C	1531	15.0102
Dysferlin(1-2017)	D	993	Dysferlin(1-2017)	A	1085	32.8311
Dysferlin(1-2017)	E	319	Dysferlin(1-2017)	E	338	5.45885
Dysferlin(1-2017)	A	1078	Dysferlin(1-2017)	A	1085	14.6364
Dysferlin(1-2017)	H	1644	Dysferlin(1-2017)	H	1658	14.0518
Dysferlin(1-2017)	C	1526	Dysferlin(1-2017)	C	1531	13.7996
Dysferlin(1-2017)	A	842	Dysferlin(1-2017)	C	1531	24.6989
Dysferlin(1-2017)	E	250	Dysferlin(1-2017)	H	1658	34.7911
Dysferlin(1-2017)	A	1169	Dysferlin(1-2017)	C	1531	22.4153
Dysferlin(1-2017)	E	250	Dysferlin(1-2017)	H	1644	30.1567
Dysferlin(1-2017)	E	338	Dysferlin(1-2017)	C	1531	36.1137
Dysferlin(1-2017)	A	1169	Dysferlin(1-2017)	C	1404	21.2225
Dysferlin(1-2017)	H	1490	Dysferlin(1-2017)	H	1503	17.3214
Dysferlin(1-2017)	E	338	Dysferlin(1-2017)	A	546	29.7176
Dysferlin(1-2017)	E	250	Dysferlin(1-2017)	C	1345	22.4475
Dysferlin(1-2017)	A	384	Dysferlin(1-2017)	A	585	15.7388
Dysferlin(1-2017)	A	546	Dysferlin(1-2017)	A	842	9.90571
Dysferlin(1-2017)	H	1712	Dysferlin(1-2017)	H	1726	10.9136
Dysferlin(1-2017)	E	250	Dysferlin(1-2017)	C	1526	28.0513
Dysferlin(1-2017)	C	1376	Dysferlin(1-2017)	H	1609	19.5677
Dysferlin(1-2017)	E	242	Dysferlin(1-2017)	H	1655	38.0354
Dysferlin(1-2017)	E	242	Dysferlin(1-2017)	C	1526	28.8328
Dysferlin(1-2017)	A	887	Dysferlin(1-2017)	A	1085	10.6855
Dysferlin(1-2017)	H	1673	Dysferlin(1-2017)	H	1712	18.3262
Dysferlin(1-2017)	C	1345	Dysferlin(1-2017)	C	1526	12.7451
Dysferlin(1-2017)	A	427	Dysferlin(1-2017)	A	571	11.4512
Dysferlin(1-2017)	A	802	Dysferlin(1-2017)	D	1023	21.811
Dysferlin(1-2017)	E	250	Dysferlin(1-2017)	H	1655	38.8707
Dysferlin(1-2017)	E	238	Dysferlin(1-2017)	C	1531	25.3955
Dysferlin(1-2017)	E	319	Dysferlin(1-2017)	A	546	32.4943
Dysferlin(1-2017)	C	1550	Dysferlin(1-2017)	H	1673	26.1671
Dysferlin(1-2017)	D	979	Dysferlin(1-2017)	D	1023	12.4023
Dysferlin(1-2017)	H	1593	Dysferlin(1-2017)	H	1604	17.2659
Dysferlin(1-2017)	E	242	Dysferlin(1-2017)	H	1658	32.9167
Dysferlin(1-2017)	D	1023	Dysferlin(1-2017)	D	1032	18.0623
Dysferlin(1-2017)	A	412	Dysferlin(1-2017)	A	436	9.55096
Dysferlin(1-2017)	D	1032	Dysferlin(1-2017)	A	1169	32.3848
Dysferlin(1-2017)	A	546	Dysferlin(1-2017)	A	563	30.1629
Dysferlin(1-2017)	A	910	Dysferlin(1-2017)	A	1085	25.979
Dysferlin(1-2017)	A	432	Dysferlin(1-2017)	A	571	12.2267
Dysferlin(1-2017)	D	979	Dysferlin(1-2017)	A	1085	13.0629
Dysferlin(1-2017)	A	458	Dysferlin(1-2017)	C	1345	43.1635
Dysferlin(1-2017)	E	250	Dysferlin(1-2017)	A	484	27.9601
Dysferlin(1-2017)	A	546	Dysferlin(1-2017)	A	571	28.2464
Dysferlin(1-2017)	A	432	Dysferlin(1-2017)	A	458	22.9852
Dysferlin(1-2017)	E	238	Dysferlin(1-2017)	E	256	4.11809
Dysferlin(1-2017)	E	338	Dysferlin(1-2017)	A	413	50.1623
Dysferlin(1-2017)	E	319	Dysferlin(1-2017)	C	1531	39.9427
Dysferlin(1-2017)	A	1169	Dysferlin(1-2017)	H	1497	82.6131
