# Supplementary material for: Structural insights into lipid membrane binding by human ferlins
Source: EMBO J. 2025 May 28;44(14):3926–58. doi: 10.1038/s44318-025-00463-8 (PMC12264198; doi:10.1038/s44318-025-00463-8)
Supplement: Supplementary file 11 — Appendix Source Data [file 44318_2025_463_MOESM11_ESM.xlsx]

## Sheet: FigS1E
[Ca2+] μM	Myoferlin (1-1997): Ca2+					Myoferlin (1-1997): Mg2+			Myoferlin (1-2061)-DDM: Ca2+
	TmoC	TmoC	TmoC	TmoC		TmoC			TmoC	TmoC	TmoC	TmoC	TmoC	TmoC	TmoC
	Repeat 1	Repeat 2	Repeat 3	Repeat 4		Repeat 1			Repeat 1	Repeat 2	Repeat 3	Repeat 4	Repeat 5	Repeat 6	Repeat 7
0	43.05	41.53	41.8	41.85		42.627			42.029	41.895	42.559	41.096	42.325	42.222	42.397
40000
20000											50.076	48.302	53.666	52.337	51.994
10000						43.72			51.313	49.645	50.221	48.86	52.326	50.955	50.845
5000						43.041			50.669	49.114	48.713	47.798	50.645	49.949	49.825
2500	50.425	50.05	48.1	48.36		42.441			48.988	48.109	47.612	47.145	49.013	48.895	48.728
1250	49.166	49.1	48.39	47.97		43.075			46.473	46.445	47.613	46.885	48.556	47.489	47.253
625	49.047		47.31	47.26		42.188			45.976	44.963	46.596	46.39	46.59	46.387	46.223
312.5	47.493	46.03	46	46.34		42.138			43.845	43.74	44.971	45.061	45.152	45.192	45.046
156.25	46.255	45.95	44.94	45.23		42.179			42.736	42.495	44.151	43.681	44.087	44.075	43.948
78.125	45.145	43.75	44.38	43.9		42.726			41.631	41.642	43.61	42.932	43.479	43.211	43.009
39.063	44.623	42.63	42.83	42.88		42.439			42.033	41.45	42.728	42.421	42.554	42.536	42.428
19.531	43.484	41.81	42.25	42		42.344			41.567	41.671	42.272	42.472	42.32	42.409	42.263
9.766	43.089	42.43	41.67	41.77		42.435			41.793	41.38	42.446	42.38	42.447
4.883	42.865	41.57	41.69	41.72		42.584			41.929	41.515	42.009
2.4415	43.016	41.39	41.52	41.69					41.189	41.586
1.22075				41.91

## Sheet: FigS1F
[Ca2+] μM	Dysferlin (1-2017): Ca2+					Dysferlin (1-2017): Mg2+					Dysferlin (1-2080)-LUV: Ca2+							Dysferlin (1-2080)-DDM: Ca2+							Dysferlin (1-2080)-DDM: Mg2+
	TmoC	TmoC	TmoC	TmoC		TmoC	TmoC				TmoC	TmoC	TmoC	TmoC	TmoC	TmoC		TmoC	TmoC	TmoC	TmoC	TmoC	TmoC		TmoC
	Repeat 1	Repeat 2	Repeat 3	Repeat 4		Repeat 1	Repeat 2				Repeat 1	Repeat 2	Repeat 3	Repeat 4	Repeat 5	Repeat 6		Repeat 1	Repeat 2	Repeat 3	Repeat 4	Repeat 5	Repeat 6		Repeat 1
0	48.4	48.4	48.3	48.6		48.4	48.4				51.553	50.114	50.138	51.66	50.159	50.095		44.1	43.8	43.8	43.7	43.6	43.7		43.7
40000	70.8	70.3	71.2	70.7		49.6	49.9
20000	70.8	70.7	70.8	71.8		49.5	49.5				77.436	74.6	74.24					72.3	68.7	68.8	72.2	69.8	69		46
10000	70.4	70.4	70.6	71.7		49.7	50				78.103	74.939	73.148					70.3	69	68.3	70.5	68.4	68.4		45.6
5000	69.3	69.5	69.8	69.4		48.9	49				76.839	77.337	74.504		74.713	75.029		67.8	67.2	66.7	67.8	66.5	66.8		45
2500	66.5	67	67.8	67.6		48.6	48.7				74.862	75.145	75.005		75.692	74.996		65	65.2	65.2	64.9	64.7	65		45
1250	64	64.5	65.4	65.3		48.3	48.5				77.22	74.862	74.563	76.555	75.826	74.549		64.4	62.4	62.5	64	62.8	61.8		44.2
625	60.8	61	61.2	60.7		48.1	48.3				75.063	73.576	73.08	73.779	73.562	73.713		59.5	59.3	59.7	59.4	59.2	58.8		44.1
312.5	57	56.9	57.1	57.2		48.1	48.4				66.53	66.453	66.664					56.4	56.2	55.8	56.5	56	56.5		43.9
156.25	54.9	55.1	55.5	54.9		48.2	48.3				66.283	65.288	64.74	66.037	64.854	63.792		53.1	52.8	53.5	53.2	53.2	52.7
78.125	53.3	53.2	53.5	53.3		48.2	48.3				63.226	61.331	61.887	61.585	61.479	61.602		51.1	50.6	51	51.2	50.4	50.2
39.063	51	51.4	52	51.7		48.1	48.5				55.472	57.751	56.882	55.131	57.366	58.175		48	48.2	48.5	48	48.5	48.4
19.531											50.699	53.917	53.397	55.327	53.456	53.764		45.6	46	46.4	45.9	46.1	46.1
9.766														51.511	52.059	51.982		44.5	44.9	44.9	44.6	44.6	44.6
4.883														51.065	51.376	51.438

## Sheet: FigS1G
[Ca2+] μM	Myoferlin (1-1997): DOPC/DOPE-only				Myoferlin (1-1997): 15 mol% DOPS				Myoferlin (1-1997): 25 mol% DOPS and 5 mol% PI(4,5)P2
	Repeat 1	Repeat 2	Repeat 3		Repeat 1	Repeat 2	Repeat 3		Repeat 1	Repeat 2	Repeat 3
500	0.762371
300	0.738691	0.679336	0.718131
200	0.577074	0.565838	0.509988		0.812653	0.818256
100	0.444073	0.415168	0.435513		0.950609	0.815529			0.960725	0.962391	0.855416
50	0.198688	0.238407	0.190662		0.64599	0.683048	0.650012		0.972438	0.981318	0.988217
25	0.0906349	0.0874167	0.104984		0.604109	0.602236	0.630328		1	0.96382	0.821512
12.5	0.0604558	0.0557085	0.0331606		0.520626	0.579457	0.514379		0.86515	0.964132	0.774328
6.25	0.0573056	0.0486749			0.450798	0.509473	0.460985		0.860013	0.927928	0.846761
3.125	0.0690738	0.0707225	0.0172681		0.374893	0.390386			0.762105	0.753478	0.575364
1.5625	0.0612273	0.0379419			0.306183	0.312956			0.661192	0.723988	0.685124
0.78125					0.245989	0.277284			0.592216	0.624395	0.640096
0.390625					0.348363	0.221116			0.646806	0.62016	0.69119

## Sheet: FigS3A
25 mol% DOPS and 5 mol% PI(4,5)P2 nanodisc
Map M1					Map M2					Map M3
Resolution (1/Å)	Myoferlin(1-1997)-MSP2N2 (map M1): masked	Myoferlin(1-1997)-MSP2N2 (map M1): corrected	Myoferlin(1-1997)-MSP2N2 (map M1): phase randomized		Resolution(1/Å)	Myoferlin(1-1997)-MSP2N2 (map M2): masked	Myoferlin(1-1997)-MSP2N2 (map M2): corrected	Myoferlin(1-1997)-MSP2N2 (map M2): phase randomized		Resolution (1/Å)	Myoferlin(1-1997)-MSP2N2 (map M3): masked	Myoferlin(1-1997)-MSP2N2 (map M3): corrected	Myoferlin(1-1997)-MSP2N2 (map M3): phase randomized
0.00192901	1	1			0.00192901	1	1			0.00192901	1	1
0.00578704	1	1	1		0.00578704	1	1	1		0.00578704	1	1	1
0.00964506	1	1			0.00964506	0.999999	0.999999	0.999999		0.00964506	0.999998	0.999998	0.999998
0.0135031	0.999999	0.999999	0.999999		0.0135031	0.999996	0.999996	0.999996		0.0135031	0.999991	0.999991	0.999992
0.0173611	0.999997	0.999997	0.999997		0.0173611	0.999995	0.999995	0.999995		0.0173611	0.999982	0.999982	0.999983
0.0212191	0.999998	0.999998	0.999998		0.0212191	0.999996	0.999996	0.999996		0.0212191	0.999984	0.999984	0.999984
0.0250772	0.999997	0.999997	0.999997		0.0250772	0.999996	0.999996	0.999996		0.0250772	0.999981	0.999981	0.999981
0.0289352	0.999995	0.999995	0.999995		0.0289352	0.999991	0.999991	0.999991		0.0289352	0.999968	0.999968	0.999969
0.0327932	0.999993	0.999993	0.999992		0.0327932	0.999988	0.999988	0.999988		0.0327932	0.999951	0.999951	0.999952
0.0366512	0.999989	0.999989	0.999989		0.0366512	0.999982	0.999982	0.999982		0.0366512	0.999917	0.999917	0.999917
0.0405093	0.999975	0.999975	0.999974		0.0405093	0.999968	0.999968	0.999968		0.0405093	0.999849	0.999849	0.999851
0.0443673	0.999952	0.999952	0.99995		0.0443673	0.999946	0.999946	0.999948		0.0443673	0.999779	0.999779	0.999782
0.0482253	0.99992	0.99992	0.999921		0.0482253	0.999914	0.999914	0.999917		0.0482253	0.99969	0.99969	0.999696
0.0520833	0.999889	0.999889	0.99989		0.0520833	0.999872	0.999872	0.999873		0.0520833	0.999549	0.999549	0.999555
0.0559414	0.999858	0.999858	0.999857		0.0559414	0.999832	0.999832	0.999832		0.0559414	0.99945	0.99945	0.999457
0.0597994	0.999842	0.999842	0.999843		0.0597994	0.999822	0.999822	0.999822		0.0597994	0.999448	0.999448	0.999452
0.0636574	0.999833	0.999833	0.999831		0.0636574	0.999807	0.999807	0.99981		0.0636574	0.99939	0.99939	0.999398
0.0675154	0.999814	0.999814	0.999812		0.0675154	0.999781	0.999781	0.999785		0.0675154	0.999259	0.999259	0.999265
0.0713735	0.999808	0.999808	0.999807		0.0713735	0.999769	0.999769	0.999771		0.0713735	0.999226	0.999226	0.999231
0.0752315	0.999801	0.999801	0.999802		0.0752315	0.999769	0.999769	0.99977		0.0752315	0.999161	0.999161	0.999171
0.0790895	0.999798	0.999798	0.999797		0.0790895	0.999763	0.999763	0.999766		0.0790895	0.999137	0.999137	0.999144
0.0829475	0.999777	0.999777	0.999774		0.0829475	0.999749	0.999749	0.999752		0.0829475	0.999114	0.999114	0.999121
0.0868056	0.999745	0.999745	0.999737		0.0868056	0.999715	0.999715	0.999718		0.0868056	0.999044	0.999044	0.999047
0.0906636	0.999688	0.999688	0.999682		0.0906636	0.999654	0.999654	0.999655		0.0906636	0.998874	0.998874	0.998878
0.0945216	0.999643	0.999643	0.999639		0.0945216	0.999593	0.999593	0.999592		0.0945216	0.998695	0.998695	0.998695
0.0983796	0.999612	0.999612	0.999611		0.0983796	0.999547	0.999547	0.999548		0.0983796	0.99852	0.99852	0.99852
0.102238	0.999584	0.999584	0.999578		0.102238	0.999507	0.999507	0.999508		0.102238	0.998345	0.998345	0.998342
0.106096	0.999529	0.999529	0.999527		0.106096	0.999452	0.999452	0.999451		0.106096	0.998125	0.998125	0.998114
0.109954	0.999417	0.999417	0.999418		0.109954	0.999331	0.999331	0.999328		0.109954	0.997754	0.997754	0.997748
0.113812	0.999245	0.999245	0.999247		0.113812	0.99918	0.99918	0.999178		0.113812	0.997313	0.997313	0.997301
0.11767	0.999007	0.999007	0.999011		0.11767	0.998961	0.998961	0.998959		0.11767	0.996743	0.996743	0.996738
0.121528	0.998777	0.998777	0.998791		0.121528	0.998779	0.998779	0.998782		0.121528	0.996098	0.996098	0.996093
0.125386	0.998621	0.998621	0.998624		0.125386	0.998585	0.998585	0.998583		0.125386	0.995527	0.995527	0.995521
0.129244	0.998449	0.998449	0.998436		0.129244	0.998364	0.998364	0.998361		0.129244	0.994835	0.994835	0.994823
0.133102	0.998195	0.998195	0.998169		0.133102	0.998103	0.998103	0.998104		0.133102	0.994144	0.994144	0.994118
0.13696	0.997796	0.997796	0.997763		0.13696	0.997838	0.997838	0.997832		0.13696	0.993087	0.993087	0.993069
0.140818	0.997339	0.997339	0.997307		0.140818	0.997566	0.997566	0.997553		0.140818	0.992027	0.992027	0.992023
0.144676	0.99704	0.99704	0.997007		0.144676	0.997329	0.997329	0.997324		0.144676	0.9913	0.9913	0.991292
0.148534	0.996927	0.996927	0.996893		0.148534	0.997077	0.997077	0.997083		0.148534	0.990935	0.990935	0.990928
0.152392	0.996777	0.996777	0.996736		0.152392	0.996927	0.996927	0.996933		0.152392	0.990531	0.990531	0.990526
0.15625	0.996445	0.996445	0.996411		0.15625	0.99668	0.99668	0.996697		0.15625	0.989726	0.989726	0.989722
0.160108	0.996141	0.996141	0.996113		0.160108	0.99638	0.99638	0.996401		0.160108	0.988885	0.988885	0.988888
0.163966	0.995887	0.995887	0.995871		0.163966	0.996167	0.996167	0.996196		0.163966	0.988336	0.988336	0.988341
0.167824	0.99576	0.99576	0.995741		0.167824	0.996055	0.996055	0.996086		0.167824	0.98809	0.98809	0.988098
0.171682	0.995722	0.995722	0.995707		0.171682	0.996093	0.996093	0.996109		0.171682	0.988489	0.988489	0.988516
0.17554	0.995733	0.995733	0.995712		0.17554	0.996184	0.996184	0.996187		0.17554	0.988968	0.988968	0.988989
0.179398	0.995744	0.995744	0.995713		0.179398	0.996332	0.996332	0.996328		0.179398	0.989248	0.989248	0.989275
0.183256	0.995819	0.995819	0.995806		0.183256	0.99655	0.99655	0.996545		0.183256	0.989379	0.989379	0.989424
0.187114	0.995984	0.995984	0.995985		0.187114	0.996697	0.996697	0.99669		0.187114	0.989825	0.989825	0.989873
0.190972	0.996105	0.996105	0.996109		0.190972	0.996723	0.996723	0.996715		0.190972	0.990318	0.990318	0.990356
0.19483	0.996157	0.996157	0.99616		0.19483	0.996717	0.996717	0.996705		0.19483	0.990636	0.990636	0.990649
0.198688	0.996021	0.996021	0.996037		0.198688	0.996787	0.996787	0.996776		0.198688	0.990845	0.990845	0.990854
0.202546	0.995892	0.995892	0.995904		0.202546	0.996809	0.996809	0.996799		0.202546	0.990723	0.990723	0.990739
0.206404	0.995831	0.995831	0.99584		0.206404	0.99684	0.99684	0.996824		0.206404	0.990725	0.990725	0.990731
0.210262	0.995683	0.995683	0.995688		0.210262	0.996779	0.996779	0.996767		0.210262	0.990419	0.990419	0.990437
0.21412	0.995474	0.995474	0.995474		0.21412	0.996714	0.996714	0.996703		0.21412	0.990158	0.990158	0.990188
0.217978	0.995295	0.995295	0.995288		0.217978	0.996589	0.996589	0.996589		0.217978	0.989724	0.989724	0.989789
0.221836	0.995038	0.995038	0.99501		0.221836	0.996318	0.996318	0.996319		0.221836	0.989362	0.989362	0.989448
0.225694	0.99481	0.99481	0.99478		0.225694	0.996029	0.996029	0.996041		0.225694	0.988893	0.988893	0.988956
0.229552	0.994546	0.994546	0.994518		0.229552	0.995769	0.995769	0.99578		0.229552	0.98849	0.98849	0.988542
0.23341	0.994021	0.994021	0.993996		0.23341	0.995387	0.995387	0.995395		0.23341	0.98748	0.98748	0.987547
0.237269	0.993209	0.993209	0.993189		0.237269	0.994869	0.994869	0.994881		0.237269	0.985777	0.985777	0.985862
0.241127	0.992206	0.992206	0.992196		0.241127	0.994117	0.994117	0.994155		0.241127	0.983478	0.983478	0.983526
0.244985	0.991204	0.991204	0.991214		0.244985	0.993257	0.993257	0.9933		0.244985	0.981278	0.981278	0.981322
0.248843	0.989848	0.989848	0.989872		0.248843	0.992141	0.992141	0.992175		0.248843	0.978701	0.978701	0.978749
0.252701	0.98845	0.98845	0.98848		0.252701	0.990859	0.990859	0.990862		0.252701	0.975719	0.975719	0.97578
0.256559	0.986886	0.986886	0.986904		0.256559	0.989406	0.989406	0.989437		0.256559	0.97245	0.97245	0.972576
0.260417	0.985775	0.985775	0.985789		0.260417	0.988135	0.988135	0.9882		0.260417	0.969828	0.969828	0.97004
0.264275	0.984345	0.984345	0.984401		0.264275	0.986741	0.986741	0.986828		0.264275	0.966558	0.966558	0.966854
0.268133	0.982775	0.982775	0.982827		0.268133	0.984898	0.984898	0.984987		0.268133	0.961994	0.961994	0.962286
0.271991	0.980722	0.980722	0.980801		0.271991	0.982467	0.982467	0.982598		0.271991	0.956261	0.956261	0.956692
0.275849	0.97836	0.97836	0.978454		0.275849	0.979927	0.979927	0.980135		0.275849	0.950183	0.950183	0.951118
0.279707	0.975509	0.975509	0.975675		0.279707	0.977497	0.977497	0.977819		0.279707	0.944597	0.944597	0.946003
0.283565	0.972449	0.972449	0.972689		0.283565	0.974843	0.974843	0.975182		0.283565	0.937131	0.937131	0.938345
0.287423	0.968901	0.968901	0.969295		0.287423	0.971565	0.971565	0.972036		0.287423	0.927636	0.927636	0.927428
0.291281	0.965402	0.965402	0.966066		0.291281	0.968147	0.968147	0.968867		0.291281	0.917129	0.917129	0.908038
0.295139	0.962236	0.962236	0.96298		0.295139	0.964134	0.964134	0.964983		0.295139	0.905812	0.905812	0.865045
0.298997	0.958747	0.958747	0.959706		0.298997	0.959591	0.959591	0.959641		0.298997	0.892297	0.892297	0.764237
0.302855	0.955069	0.955069	0.956222		0.302855	0.953713	0.953713	0.950645		0.302855	0.875834	0.69748	0.589561
0.306713	0.949663	0.949663	0.950989		0.306713	0.94576	0.94576	0.930886		0.306713	0.856011	0.743026	0.439675
0.310571	0.943349	0.943349	0.942396		0.310571	0.9373	0.9373	0.884332		0.310571	0.8376	0.744494	0.364398
0.314429	0.935038	0.935038	0.923829		0.314429	0.926393	0.926393	0.767116		0.314429	0.816581	0.726648	0.329001
0.318287	0.924373	0.924373	0.879438		0.318287	0.913303	0.801963	0.562218		0.318287	0.791211	0.704006	0.294617
0.322145	0.912275	0.912275	0.775798		0.322145	0.898817	0.828021	0.411655		0.322145	0.765838	0.683751	0.259564
0.326003	0.898927	0.748332	0.598388		0.326003	0.882966	0.822415	0.340969		0.326003	0.737264	0.656784	0.234488
0.329861	0.883579	0.785681	0.456786		0.329861	0.86395	0.807916	0.291716		0.329861	0.700829	0.61811	0.216604
0.333719	0.867233	0.785093	0.382212		0.333719	0.840948	0.785058	0.260024		0.333719	0.661141	0.581506	0.190289
0.337577	0.849141	0.773216	0.33479		0.337577	0.814968	0.758684	0.233238		0.337577	0.620439	0.549504	0.15746
0.341435	0.828396	0.756037	0.296598		0.341435	0.785808	0.72799	0.212558		0.341435	0.572517	0.509322	0.128791
0.345293	0.804482	0.733317	0.266852		0.345293	0.755137	0.694641	0.198114		0.345293	0.526206	0.470368	0.105428
0.349151	0.777403	0.70722	0.239712		0.349151	0.719847	0.658947	0.178565		0.349151	0.48543	0.428742	0.0992336
0.353009	0.74481	0.677286	0.209238		0.353009	0.683517	0.627165	0.151145		0.353009	0.441373	0.379362	0.0999149
0.356867	0.708237	0.641995	0.185031		0.356867	0.644026	0.592391	0.126678		0.356867	0.404217	0.342433	0.0939585
0.360725	0.67544	0.61107	0.165505		0.360725	0.601983	0.55611	0.103343		0.360725	0.370939	0.315071	0.0815676
0.364583	0.647894	0.587904	0.145573		0.364583	0.565071	0.522783	0.0886138		0.364583	0.339688	0.282979	0.0790897
0.368441	0.618773	0.561969	0.12968		0.368441	0.528982	0.490359	0.0757847		0.368441	0.308877	0.255836	0.071276
0.372299	0.586238	0.53856	0.103324		0.372299	0.492388	0.45284	0.0722787		0.372299	0.279544	0.237617	0.0549947
0.376157	0.544624	0.503999	0.0819051		0.376157	0.44785	0.410704	0.0630345		0.376157	0.247069	0.215947	0.0396937
0.380015	0.498808	0.460751	0.0705741		0.380015	0.394446	0.354832	0.0614011		0.380015	0.214662	0.183518	0.0381441
0.383873	0.452443	0.412102	0.068619		0.383873	0.339938	0.300961	0.055758		0.383873	0.187037	0.162446	0.0293605
0.387731	0.415542	0.378973	0.0588847		0.387731	0.299757	0.263944	0.0486553		0.387731	0.165558	0.150213	0.0180575
0.39159	0.38084	0.351234	0.0456343		0.39159	0.266573	0.241599	0.0329298		0.39159	0.14526	0.138668	0.00765326
0.395448	0.345271	0.320293	0.0367482		0.395448	0.237035	0.224508	0.0161536		0.395448	0.117152	0.115327	0.00206291
0.399306	0.309467	0.286817	0.031759		0.399306	0.20888	0.20286	0.007552		0.399306	0.09654	0.090798	0.00631543
0.403164	0.280888	0.255951	0.0335153		0.403164	0.180782	0.173248	0.00911277		0.403164	0.082736	0.0648	0.0191788
0.407022	0.250871	0.233591	0.0225467		0.407022	0.157102	0.140469	0.0193513		0.407022	0.076233	0.05293	0.0246054
0.41088	0.219855	0.198228	0.026974		0.41088	0.134824	0.11581	0.0215044		0.41088	0.069457	0.046014	0.0245737
0.414738	0.19533	0.167155	0.0338298		0.414738	0.115723	0.099446	0.0180744		0.414738	0.062946	0.040241	0.023657
0.418596	0.175141	0.145576	0.0346023		0.418596	0.101539	0.086716	0.0162304		0.418596	0.054075	0.035663	0.0190929
0.422454	0.151597	0.119514	0.0364378		0.422454	0.093406	0.083234	0.0110955		0.422454	0.043632	0.028489	0.0155871
0.426312	0.132524	0.10475	0.0310237		0.426312	0.08286	0.062725	0.0214825		0.426312	0.028972	0.018372	0.0107984
0.43017	0.117452	0.093317	0.026619		0.43017	0.076771	0.05863	0.0192708		0.43017	0.018084	0.006916	0.0112458
0.434028	0.098776	0.085579	0.0144321		0.434028	0.070295	0.068529	0.00189593		0.434028	0.011995	-0.004443	0.0163653
0.437886	0.090589	0.080478	0.0109959		0.437886	0.062445	0.073077	-0.0114702		0.437886	0.010892	-0.002711	0.0135662
0.441744	0.077716	0.06471	0.0139058		0.441744	0.0541	0.065585	-0.0122911		0.441744	0.008409	-0.001343	0.00973892
0.445602	0.067645	0.052923	0.0155447		0.445602	0.046074	0.047972	-0.00199364		0.445602	0.000165	-0.006826	0.0069436
0.44946	0.054312	0.043242	0.0115703		0.44946	0.040978	0.034934	0.00626278		0.44946	-0.000684	-0.006369	0.00564902
0.453318	0.047088	0.041872	0.00544395		0.453318	0.03228	0.028405	0.00398829		0.453318	0.004995	-0.003999	0.00895818
0.457176	0.041897	0.041959	-6.47154e-05		0.457176	0.026703	0.027352	-0.000667251		0.457176	0.008679	0.000301	0.00838052
0.461034	0.035494	0.032295	0.00330576		0.461034	0.026802	0.020697	0.00623403		0.461034	0.008523	0.009809	-0.00129874
0.464892	0.027202	0.019822	0.00752925		0.464892	0.022437	0.012934	0.00962752		0.464892	0.011861	0.015662	-0.00386148
0.46875	0.016454	0.008497	0.00802519		0.46875	0.013376	0.003621	0.00979045		0.46875	0.009332	0.009908	-0.000581764
0.472608	0.009431	0.002785	0.00666456		0.472608	0.003886	0.001037	0.00285196		0.472608	0.000558	-0.009469	0.00993295
0.476466	0.008743	-0.002619	0.0113323		0.476466	8.7e-05	0.005392	-0.00533376		0.476466	-0.005047	-0.014318	0.00914013
0.480324	0.016718	0.00784	0.00894815		0.480324	-3.5e-05	0.007055	-0.00714038		0.480324	-0.001921	-0.007497	0.00553451
0.484182	0.023612	0.019827	0.00386156		0.484182	0.003194	0.006482	-0.00330945		0.484182	-0.00088	-0.003241	0.00235337
0.48804	0.016353	0.012069	0.00433634		0.48804	0.007476	0.005082	0.00240623		0.48804	0.004019	0.004925	-0.000910484
0.491898	0.009484	0.003598	0.00590725		0.491898	0.011809	0.009247	0.00258591		0.491898	0.003076	0.005767	-0.00270661
0.495756	0.009479	0.001109	0.00837929		0.495756	0.018616	0.019316	-0.000713788		0.495756	-0.003913	0.004328	-0.00827682
0.499614	0.012443	0.003862	0.00861427		0.499614	0.016517	0.02056	-0.00412787		0.499614	-0.011344	-0.001757	-0.00957019
0.503472	0.014007	0.005929	0.00812618		0.503472	0.014576	0.012724	0.00187587		0.503472	-0.015036	-0.013213	-0.00179923
0.50733	0.013815	0.004744	0.00911424		0.50733	0.012541	0.009944	0.00262308		0.50733	-0.015429	-0.022744	0.00715233
0.511188	0.005781	-0.001365	0.00713626		0.511188	0.015516	0.011455	0.00410806		0.511188	-0.012539	-0.021949	0.0092079
0.515046	-0.002768	-0.006056	0.00326821		0.515046	0.01226	0.013139	-0.000890703		0.515046	-0.006268	-0.008849	0.00255836
0.518904	-0.009153	-0.007666	-0.00147569		0.518904	0.008719	0.01244	-0.00376787		0.518904	0.002024	-0.001458	0.00347693
0.522762	-0.006843	-0.007913	0.0010616		0.522762	0.001708	0.008823	-0.00717833		0.522762	0.002932	-0.005759	0.00864124
0.52662	-0.000749	0.000396	-0.00114545		0.52662	0.004338	0.014338	-0.0101455		0.52662	0.006589	-0.002831	0.00939341
0.530478	3.1e-05	0.003755	-0.00373804		0.530478	0.008054	0.017153	-0.0092578		0.530478	0.011696	0.002529	0.00919024
0.534336	-0.006103	-0.000796	-0.00530278		0.534336	0.006444	0.009635	-0.00322204		0.534336	0.005481	0.001959	0.00352891
0.538194	-0.008424	-0.004968	-0.00343891		0.538194	0.006765	0.006947	-0.000183273		0.538194	0.001497	-0.001664	0.00315575
0.542052	-0.004105	-0.001951	-0.00214981		0.542052	0.008996	0.005952	0.00306223		0.542052	0.007149	0.010039	-0.00291931
0.54591	0.000696	0.004534	-0.00385548		0.54591	0.009498	0.002043	0.00747026		0.54591	0.013941	0.016913	-0.00302313
0.549769	-0.000532	0.004447	-0.00500124		0.549769	0.005886	-0.006147	0.0119595		0.549769	0.013245	0.013689	-0.000450162
0.553627	-0.000691	0.006546	-0.00728469		0.553627	0.009513	-0.001355	0.0108533		0.553627	0.008581	0.005997	0.00259959
0.557485	0.006064	0.014928	-0.00899833		0.557485	0.010637	0.002751	0.00790775		0.557485	0.006731	0.002748	0.00399398
0.561343	0.01053	0.021282	-0.0109858		0.561343	0.007039	-0.003342	0.0103464		0.561343	-0.000905	-0.005927	0.00499241
0.565201	0.008108	0.017584	-0.00964561		0.565201	0.001267	-0.007863	0.00905877		0.565201	-0.005605	-0.00959	0.00394715
0.569059	0.002522	0.01657	-0.0142847		0.569059	-0.001693	-0.008055	0.00631116		0.569059	-0.011909	-0.014778	0.00282722
0.572917	-0.002374	0.00924	-0.0117223		0.572917	-0.00557	-0.005303	-0.000265592		0.572917	-0.008804	-0.008489	-0.000312348
0.576775	-0.011347	-0.002978	-0.00834415		0.576775	-0.005736	-0.002488	-0.00323994		0.576775	0.001598	0.002167	-0.000570236
0.580633	-0.010144	-0.007046	-0.00307632		0.580633	0.00304	0.003922	-0.000885473		0.580633	0.00517	0.006814	-0.00165528
0.584491	-0.003737	-0.008735	0.00495472		0.584491	0.00636	0.000512	0.005851		0.584491	0.001463	-0.001977	0.00343321
0.588349	-0.004431	-0.012309	0.00778221		0.588349	0.003455	-0.003504	0.0069347		0.588349	-0.000816	-0.002294	0.00147462
0.592207	-0.004734	-0.012343	0.00751623		0.592207	-0.001868	-0.004803	0.00292097		0.592207	0.005961	0.006911	-0.000956611
0.596065	-0.000603	-0.004229	0.00361073		0.596065	-0.005773	-0.006492	0.000714362		0.596065	0.009099	0.012868	-0.00381813
0.599923	0.003405	0.001044	0.00236347		0.599923	0.001707	0.005624	-0.00393915		0.599923	0.007107	0.008061	-0.000961753
0.603781	0.0001	-0.005045	0.00511917		0.603781	0.01191	0.015126	-0.00326539		0.603781	0.00442	0.005289	-0.000873621
0.607639	-0.002392	-0.014032	0.0114789		0.607639	0.016292	0.013481	0.00284941		0.607639	0.006004	0.001561	0.00444995
0.611497	0.003232	-0.006878	0.0100409		0.611497	0.015545	0.008748	0.00685699		0.611497	0.006924	-0.004929	0.0117949
0.615355	0.004453	-0.001172	0.00561841		0.615355	0.011645	0.002212	0.00945391		0.615355	9.3e-05	-0.012623	0.0125575
0.619213	0.004861	0.000239	0.0046231		0.619213	0.010432	-0.000612	0.0110372		0.619213	-0.006203	-0.014949	0.00861718
0.623071	0.007144	0.002014	0.00514035		0.623071	0.009416	-0.004692	0.0140421		0.623071	-0.003665	-0.011517	0.0077626
0.626929	0.011135	0.007382	0.00378091		0.626929	0.005431	-0.008185	0.0135055		0.626929	0.005976	-0.004839	0.0107629
0.630787	0.01164	0.010848	0.000800686		0.630787	-0.000686	-0.010657	0.00986586		0.630787	0.002284	-0.009179	0.0113587
0.634645	0.011483	0.011664	-0.000183136		0.634645	-0.0029	-0.011497	0.00849928		0.634645	-0.002569	-0.00396	0.00138551
0.638503	0.009375	0.012046	-0.00270357		0.638503	-0.001156	-0.006497	0.00530652		0.638503	-0.007298	-0.005319	-0.00196853
0.642361	-0.000759	-0.0023	0.00153746		0.642361	-0.000402	-0.006629	0.00618599		0.642361	-0.003808	-0.009174	0.00531722
0.646219	-0.008563	-0.014779	0.00612547		0.646219	-0.002474	-0.012179	0.00958823		0.646219	0.000176	-0.006848	0.00697623
0.650077	-0.006008	-0.012217	0.00613406		0.650077	-0.003255	-0.015907	0.0124539		0.650077	0.001508	-0.001899	0.00340054
0.653935	-0.000376	-0.003107	0.00272254		0.653935	-0.004438	-0.021805	0.0169964		0.653935	0.003998	0.007578	-0.00360734
0.657793	0.007628	0.012405	-0.004837		0.657793	-0.001112	-0.017947	0.0165382		0.657793	0.006763	0.008717	-0.00197118
0.661651	0.00279	0.011985	-0.00930654		0.661651	0.003343	-0.012761	0.0159011		0.661651	0.002326	-0.000748	0.0030717
0.665509	0.000616	-0.000326	0.000941693		0.665509	0.002835	-0.013195	0.0158212		0.665509	-0.004627	-0.011519	0.00681352
0.669367	0.005871	0.002999	0.00288064		0.669367	0.001779	-0.011021	0.0126605		0.669367	-0.005241	-0.004056	-0.00118021
0.673225	0.006785	0.005276	0.001517		0.673225	-1.1e-05	-0.006095	0.00604714		0.673225	0.002272	0.007068	-0.00483014
0.677083	0.002506	0.001085	0.00142254		0.677083	0.002787	0.003118	-0.000332035		0.677083	0.005963	0.009395	-0.00346455
0.680941	0.008674	0.008076	0.000602869		0.680941	0.007232	0.007405	-0.000174291		0.680941	0.006087	0.00761	-0.00153468
0.684799	0.017064	0.017824	-0.000773792		0.684799	0.01036	0.005759	0.00462765		0.684799	0.008278	0.01104	-0.00279283

## Sheet: FigS3F
map M3: 25 mol% DOPS and 5 mol% PI(4,5)P2
Resolution (1/A)	Unmasked	Masked
0.0264159	0.851536	0.868787
0.0352266	0.85145	0.868544
0.0410082	0.851131	0.868148
0.04532	0.851534	0.868622
0.0491999	0.851554	0.868531
0.0521322	0.851344	0.86811
0.0551102	0.852011	0.868534
0.0577278	0.852139	0.868468
0.0600242	0.851554	0.867597
0.0621696	0.850311	0.86616
0.0643219	0.849442	0.864888
0.0661422	0.849179	0.864313
0.0680175	0.848412	0.863221
0.0697429	0.847078	0.861745
0.0714944	0.846392	0.860659
0.0728116	0.845286	0.85913
0.074412	0.845811	0.858897
0.0759437	0.845224	0.857975
0.0772762	0.845196	0.857424
0.078582	0.844894	0.856707
0.0800504	0.844424	0.855779
0.0813462	0.843232	0.854152
0.0823912	0.842423	0.852888
0.0833823	0.8421	0.851998
0.0847255	0.841142	0.850731
0.0859279	0.839459	0.84839
0.0869906	0.838729	0.846935
0.0880866	0.838799	0.846419
0.0891924	0.837882	0.84482
0.0901634	0.836844	0.843167
0.0910808	0.835615	0.841124
0.0920171	0.835247	0.840051
0.0929685	0.834685	0.838881
0.0939389	0.834968	0.838465
0.0948389	0.834685	0.837315
0.0957386	0.83377	0.835317
0.096759	0.833232	0.833922
0.0976363	0.832469	0.832325
0.0984471	0.831295	0.830614
0.0992583	0.829686	0.828191
0.100064	0.828617	0.826327
0.100764	0.82726	0.824379
0.101667	0.826145	0.822473
0.102382	0.824726	0.820882
0.103181	0.823868	0.819176
0.10395	0.822649	0.817363
0.10472	0.821626	0.815911
0.105454	0.819866	0.813897
0.106311	0.819727	0.813554
0.106931	0.817763	0.812159
0.10763	0.81764	0.812434
0.108414	0.816357	0.811946
0.108982	0.815482	0.811636
0.10978	0.813891	0.810868
0.110308	0.812678	0.810042
0.110991	0.811136	0.808982
0.111638	0.811274	0.808885
0.112507	0.810295	0.808055
0.113108	0.809548	0.807338
0.113647	0.809552	0.807955
0.114144	0.808621	0.807336
0.114761	0.807809	0.806611
0.115484	0.805966	0.804845
0.116142	0.803678	0.802771
0.11674	0.802364	0.801732
0.11741	0.801375	0.800798
0.117961	0.800964	0.800482
0.118493	0.800199	0.799753
0.119058	0.799206	0.798833
0.119741	0.797735	0.797547
0.120266	0.797033	0.79716
0.120774	0.797149	0.797409
0.12135	0.795974	0.796219
0.121844	0.794564	0.794784
0.122411	0.793027	0.793262
0.122973	0.791723	0.791809
0.123461	0.790845	0.790945
0.124047	0.789096	0.78922
0.124523	0.787374	0.787857
0.125053	0.787599	0.788061
0.125657	0.787282	0.78787
0.126293	0.786674	0.787032
0.12668	0.784651	0.785253
0.127126	0.783487	0.784245
0.127572	0.782454	0.783291
0.128142	0.782359	0.783207
0.128668	0.781588	0.782559
0.129282	0.779882	0.780948
0.129758	0.778316	0.779524
0.130308	0.77724	0.778651
0.130669	0.776102	0.777527
0.131056	0.775074	0.77659
0.131539	0.774825	0.776249
0.131942	0.77375	0.775343
0.132443	0.772521	0.774105
0.132851	0.77164	0.773341
0.133289	0.770842	0.772464
0.133733	0.77045	0.772007
0.134365	0.769304	0.770973
0.134916	0.768761	0.77056
0.135263	0.768778	0.770521
0.135654	0.767688	0.769424
0.136129	0.76717	0.769103
0.13656	0.766917	0.768922
0.137122	0.766876	0.768828
0.137543	0.766435	0.768265
0.138028	0.766015	0.767944
0.138348	0.764384	0.766408
0.138679	0.763544	0.765503
0.13908	0.763391	0.765076
0.139551	0.763819	0.765523
0.140053	0.763778	0.765484
0.140378	0.764294	0.766041
0.140764	0.764515	0.766407
0.141206	0.764651	0.766537
0.141627	0.764707	0.76679
0.141985	0.764538	0.766818
0.142357	0.763742	0.766563
0.142819	0.764252	0.76725
0.143244	0.764007	0.767205
0.143698	0.763518	0.766721
0.144091	0.762734	0.76614
0.144431	0.763376	0.766887
0.144767	0.76343	0.766942
0.145203	0.763847	0.767505
0.145632	0.764359	0.767924
0.146024	0.764874	0.768459
0.146417	0.765187	0.768922
0.146798	0.764754	0.768355
0.147123	0.764945	0.768611
0.14747	0.765208	0.768981
0.147886	0.765335	0.769172
0.148341	0.766391	0.770206
0.148698	0.766155	0.770022
0.149073	0.76585	0.769881
0.149341	0.766288	0.770314
0.149699	0.766754	0.771089
0.150013	0.766288	0.770725
0.150408	0.766491	0.770927
0.150767	0.766678	0.771229
0.151212	0.767788	0.772377
0.151568	0.768379	0.77278
0.151903	0.768935	0.773393
0.152267	0.76994	0.774525
0.15257	0.770885	0.775442
0.152909	0.77253	0.777127
0.153238	0.773201	0.777898
0.153513	0.774105	0.778963
0.15396	0.776069	0.780948
0.154305	0.776294	0.781292
0.154658	0.777144	0.782116
0.154987	0.777858	0.782829
0.155344	0.778932	0.783852
0.155741	0.77971	0.78462
0.156112	0.780233	0.785213
0.156487	0.78116	0.786012
0.156781	0.781863	0.786724
0.157059	0.781017	0.786599
0.15739	0.780973	0.786666
0.15773	0.782535	0.788061
0.158029	0.781387	0.786923
0.158311	0.781832	0.787292
0.158638	0.781898	0.787405
0.158909	0.782961	0.788539
0.159215	0.784997	0.790341
0.159565	0.785207	0.790639
0.159929	0.785977	0.791505
0.160195	0.786155	0.791637
0.160562	0.785734	0.791206
0.160991	0.78632	0.791761
0.161399	0.787426	0.79284
0.161671	0.787528	0.792826
0.161916	0.786934	0.792064
0.162221	0.787388	0.792426
0.162513	0.788252	0.793237
0.162742	0.789274	0.794322
0.163019	0.789696	0.794919
0.163296	0.791078	0.796204
0.163685	0.792049	0.797214
0.164016	0.792897	0.797915
0.164272	0.792368	0.797544
0.164529	0.792311	0.797461
0.164763	0.792393	0.797818
0.165125	0.7932	0.798557
0.165513	0.794035	0.799403
0.165836	0.794511	0.799812
0.166163	0.793913	0.799259
0.166443	0.794183	0.799402
0.166702	0.794185	0.799517
0.166981	0.795329	0.800556
0.167262	0.79558	0.800899
0.167648	0.796574	0.801955
0.167997	0.797553	0.80291
0.1683	0.797734	0.803171
0.168611	0.798002	0.803292
0.168803	0.798885	0.804266
0.169033	0.799411	0.804745
0.169311	0.800155	0.805379
0.169524	0.800164	0.805373
0.169801	0.801435	0.806553
0.17014	0.802473	0.807602
0.170461	0.802387	0.807482
0.170706	0.802834	0.807953
0.170959	0.803219	0.808247
0.171257	0.803847	0.808902
0.171535	0.80361	0.808635
0.17186	0.804647	0.809675
0.172105	0.805723	0.81067
0.172346	0.807098	0.811886
0.172614	0.807717	0.812545
0.172875	0.808283	0.813502
0.17318	0.808363	0.813587
0.173444	0.809288	0.81453
0.173678	0.809963	0.815238
0.173972	0.810344	0.815521
0.174261	0.811604	0.816752
0.174591	0.812299	0.817237
0.174892	0.812559	0.817579
0.175116	0.813012	0.818153
0.175373	0.812977	0.817989
0.175659	0.813344	0.818379
0.175963	0.814046	0.819107
0.17622	0.814192	0.819159
0.17644	0.81463	0.819411
0.176713	0.816183	0.820953
0.176965	0.81644	0.821029
0.177244	0.816532	0.82125
0.177503	0.817587	0.822352
0.177746	0.818142	0.822902
0.178024	0.818559	0.823382
0.178242	0.819211	0.8241
0.178457	0.819728	0.824499
0.178715	0.821119	0.82585
0.179036	0.821076	0.825844
0.179286	0.821758	0.826589
0.179572	0.822227	0.826937
0.179787	0.822973	0.827735
0.180047	0.823163	0.827948
0.180251	0.824671	0.829494
0.180513	0.825544	0.83033
0.180789	0.827052	0.831826
0.181046	0.827733	0.832537
0.18132	0.828505	0.833578
0.181525	0.829671	0.834712
0.181743	0.830684	0.835678
0.181973	0.831344	0.83644
0.182193	0.831399	0.836429
0.182441	0.832311	0.837324
0.182688	0.833121	0.838125
0.182938	0.833708	0.838856
0.183167	0.83427	0.839349
0.183497	0.834899	0.839967
0.18377	0.834879	0.839973
0.184037	0.836135	0.841269
0.184245	0.837531	0.84274
0.184463	0.837964	0.843119
0.184682	0.838804	0.843924
0.184896	0.840015	0.844985
0.185144	0.841015	0.845886
0.185346	0.842246	0.847006
0.185633	0.842592	0.847432
0.185946	0.84356	0.848376
0.186151	0.844372	0.849069
0.186402	0.845891	0.850602
0.186661	0.847259	0.851928
0.186917	0.847315	0.852077
0.187121	0.848504	0.853188
0.187385	0.849522	0.854076
0.187601	0.850468	0.854994
0.187815	0.851421	0.855863
0.188078	0.852372	0.856791
0.188279	0.853042	0.857414
0.188499	0.854008	0.858297
0.188715	0.855173	0.859494
0.188924	0.856377	0.860679
0.18911	0.856818	0.86123
0.189315	0.857503	0.861921
0.189572	0.85822	0.862702
0.1898	0.858201	0.862902
0.190008	0.858905	0.863599
0.190219	0.859351	0.864212
0.19044	0.860019	0.864853
0.190673	0.860447	0.865272
0.190901	0.860838	0.865655
0.191127	0.861036	0.86584
0.191356	0.860986	0.86579
0.191535	0.861125	0.865982
0.191765	0.862097	0.866978
0.192019	0.863267	0.868224
0.192305	0.863842	0.868757
0.192554	0.863825	0.868851
0.192737	0.864391	0.869486
0.19298	0.863848	0.868904
0.19319	0.86403	0.86912
0.193434	0.86474	0.869752
0.19368	0.864918	0.869985
0.193926	0.865148	0.870185
0.194128	0.865436	0.870467
0.19434	0.865603	0.870683
0.194526	0.866228	0.871239
0.194723	0.866379	0.871318
0.194889	0.866345	0.871224
0.195079	0.866732	0.871697
0.195289	0.867575	0.872422
0.195546	0.868655	0.873363
0.195766	0.868944	0.873535
0.19598	0.869401	0.873942
0.196168	0.869031	0.873688
0.196345	0.869105	0.873746
0.196548	0.869537	0.874169
0.196798	0.869909	0.874423
0.197074	0.870193	0.87463
0.197367	0.870656	0.875072
0.197534	0.870979	0.875485
0.197724	0.870465	0.874931
0.197915	0.870056	0.874558
0.198111	0.869649	0.874222
0.198274	0.869641	0.874372
0.198482	0.869745	0.874525
0.198664	0.869756	0.874261
0.198854	0.869922	0.874419
0.199049	0.870047	0.874577
0.199275	0.870872	0.875416
0.199556	0.87139	0.875913
0.199777	0.871893	0.876492
0.199988	0.871205	0.875856
0.200205	0.871455	0.876288
0.200381	0.871381	0.876289
0.200574	0.871299	0.876164
0.200746	0.871414	0.876228
0.20097	0.871086	0.875986
0.201175	0.87177	0.876626
0.201414	0.871666	0.876588
0.201601	0.871321	0.87632
0.201808	0.871312	0.876325
0.202015	0.871186	0.876132
0.202177	0.871199	0.876146
0.202373	0.870711	0.875644
0.202561	0.870652	0.875508
0.202709	0.870373	0.875141
0.202868	0.870606	0.875454
0.203074	0.869838	0.874626
0.203269	0.869566	0.874362
0.203519	0.869846	0.874561
0.203765	0.869613	0.874301
0.203955	0.869347	0.874164
0.204121	0.86969	0.874473
0.204282	0.869837	0.8747
0.204477	0.870172	0.874983
0.204675	0.870512	0.875287
0.204905	0.870098	0.874794
0.205149	0.870042	0.874775
0.205344	0.870505	0.875216
0.205542	0.871353	0.875993
0.205755	0.87088	0.875514
0.205994	0.870527	0.875107
0.206189	0.871409	0.875896
0.206399	0.871799	0.876359
0.206575	0.872234	0.876724
0.20671	0.872668	0.8771
0.20689	0.873837	0.878256
0.207114	0.874164	0.878547
0.207306	0.874561	0.878995
0.207506	0.874799	0.879213
0.207655	0.874735	0.879009
0.207812	0.87452	0.87882
0.207997	0.874851	0.879088
0.208169	0.875455	0.87977
0.208327	0.875163	0.879562
0.208513	0.875134	0.87961
0.208688	0.87536	0.879967
0.20888	0.875857	0.8804
0.20908	0.876693	0.88121
0.209277	0.876734	0.881351
0.209448	0.877439	0.882047
0.209683	0.877572	0.882324
0.209875	0.877527	0.882376
0.210083	0.878293	0.883175
0.210271	0.878605	0.883456
0.210454	0.878778	0.883594
0.210659	0.879067	0.883993
0.210843	0.879404	0.884273
0.210979	0.879871	0.884825
0.211155	0.879727	0.884808
0.211353	0.879379	0.884645
0.211569	0.879571	0.884831
0.211748	0.879328	0.884597
0.211901	0.879907	0.885265
0.212102	0.87957	0.885006
0.212304	0.879352	0.884839
0.212475	0.879866	0.885352
0.212632	0.880342	0.885747
0.212799	0.880606	0.885904
0.212945	0.881392	0.886608
0.21312	0.881584	0.886869
0.213274	0.881226	0.886558
0.213453	0.88155	0.88687
0.213676	0.881602	0.886961
0.213829	0.88159	0.886941
0.213986	0.882006	0.887362
0.214175	0.882261	0.887705
0.214381	0.882719	0.888185
0.214567	0.883268	0.888664
0.214775	0.884161	0.88939
0.214961	0.88477	0.890051
0.215154	0.884359	0.889739
0.215328	0.884815	0.890147
0.215508	0.884985	0.890268
0.21566	0.885467	0.890721
0.215868	0.885695	0.890914
0.216028	0.885775	0.890908
0.216198	0.88569	0.890852
0.216409	0.885691	0.890836
0.216591	0.885806	0.890917
0.216767	0.88542	0.89045
0.216918	0.885487	0.890524
0.21707	0.885678	0.89068
0.217225	0.885634	0.890558
0.217416	0.885613	0.890588
0.217587	0.885901	0.890799
0.217761	0.88623	0.891193
0.217948	0.886738	0.891738
0.218094	0.887046	0.891986
0.218238	0.886542	0.891477
0.218478	0.886634	0.891562
0.218671	0.886412	0.891412
0.21885	0.886797	0.891661
0.218989	0.886405	0.891194
0.219131	0.886606	0.89116
0.2193	0.886537	0.891065
0.219464	0.886589	0.891221
0.219642	0.88674	0.891317
0.219815	0.886509	0.89111
0.220003	0.886811	0.891345
0.220166	0.886887	0.891466
0.220314	0.886942	0.89152
0.220444	0.887722	0.892338
0.220567	0.887342	0.891958
0.220742	0.887617	0.89215
0.220918	0.88762	0.89215
0.221099	0.887796	0.892315
0.221272	0.887006	0.89156
0.22141	0.887568	0.892118
0.221588	0.887418	0.891891
0.221785	0.886583	0.891216
0.221975	0.886906	0.891576
0.222134	0.887108	0.891667
0.222295	0.88706	0.891632
0.222454	0.886976	0.891537
0.222592	0.887159	0.891721
0.222745	0.886945	0.891497
0.222902	0.887073	0.891615
0.223076	0.88696	0.891528
0.223269	0.886845	0.891459
0.223435	0.886853	0.891548
0.223614	0.887133	0.891814
0.22379	0.887722	0.892296
0.223941	0.887445	0.892088
0.224086	0.886976	0.891713
0.22427	0.886463	0.891224
0.224441	0.886442	0.891293
0.224598	0.885736	0.890709
0.22475	0.88544	0.890428
0.22496	0.885742	0.890593
0.225097	0.885925	0.890759
0.225255	0.886113	0.891186
0.225475	0.886417	0.89152
0.22565	0.886411	0.891606
0.225815	0.886254	0.891511
0.225993	0.886573	0.891886
0.226133	0.886365	0.891732
0.226256	0.886386	0.891734
0.22642	0.886412	0.891887
0.226568	0.886237	0.891727
0.226733	0.886154	0.891658
0.226903	0.885839	0.891407
0.227037	0.885377	0.891017
0.227203	0.885559	0.891199
0.227369	0.885314	0.891043
0.227504	0.88541	0.891238
0.227634	0.885062	0.891147
0.227832	0.884591	0.890683
0.227966	0.883851	0.889979
0.228093	0.882951	0.889104
0.228254	0.882917	0.889127
0.228403	0.882781	0.888959
0.228566	0.882388	0.888654
0.22872	0.883009	0.889268
0.228857	0.882806	0.88901
0.229024	0.882974	0.889133
0.229194	0.882587	0.888679
0.229322	0.882299	0.888406
0.229442	0.882124	0.888308
0.229583	0.882308	0.888484
0.229751	0.882123	0.888388
0.229965	0.883033	0.889175
0.230136	0.882863	0.888995
0.230257	0.883043	0.889257
0.230389	0.883522	0.889529
0.230563	0.884005	0.889824
0.230745	0.883642	0.889525
0.23087	0.884888	0.890672
0.231027	0.884736	0.890416
0.231228	0.884185	0.889775
0.231382	0.883598	0.889308
0.231514	0.883133	0.888792
0.231643	0.882975	0.888517
0.231819	0.882959	0.888497
0.231986	0.88259	0.88811
0.232155	0.881858	0.887384
0.232336	0.881996	0.887356
0.232471	0.881578	0.887033
0.232626	0.881096	0.886531
0.232756	0.881257	0.886562
0.232883	0.881124	0.886354
0.233061	0.881148	0.886406
0.233177	0.881275	0.886582
0.23333	0.88122	0.886495
0.233495	0.880946	0.886255
0.233647	0.880112	0.885422
0.233779	0.879586	0.884924
0.23393	0.879928	0.885133
0.234075	0.879478	0.884696
0.234232	0.879039	0.884299
0.234357	0.879335	0.884659
0.234509	0.878985	0.884387
0.234653	0.878751	0.884207
0.234785	0.878424	0.883972
0.23491	0.87815	0.883669
0.23506	0.876996	0.882711
0.235231	0.876537	0.882343
0.235414	0.876126	0.881864
0.235593	0.875422	0.881163
0.235756	0.874805	0.880759
0.235899	0.874112	0.880019
0.236059	0.873061	0.879008
0.236194	0.872388	0.878396
0.236333	0.870983	0.87698
0.23645	0.871285	0.877342
0.23662	0.870441	0.876635
0.236811	0.869961	0.876118
0.236967	0.869878	0.876008
0.237093	0.869539	0.875627
0.237221	0.868293	0.874534
0.237349	0.86739	0.873846
0.237473	0.867197	0.873635
0.237638	0.866779	0.873235
0.237773	0.866304	0.872911
0.237903	0.865093	0.871701
0.238032	0.864805	0.87142
0.238204	0.864614	0.871314
0.238333	0.864163	0.870998
0.238464	0.863348	0.870316
0.238605	0.862551	0.869538
0.238756	0.862258	0.869317
0.238956	0.861081	0.868145
0.239104	0.860912	0.868036
0.239225	0.859593	0.866817
0.239361	0.859632	0.866554
0.239481	0.859122	0.866116
0.239613	0.859062	0.866115
0.239772	0.85825	0.865331
0.239885	0.857694	0.864814
0.240017	0.857068	0.864342
0.240122	0.85593	0.863402
0.240249	0.855451	0.863058
0.240377	0.85474	0.862423
0.24052	0.854157	0.861969
0.240674	0.85462	0.862569
0.240802	0.854449	0.862501
0.240925	0.853846	0.861906
0.241124	0.853429	0.861557
0.241278	0.853331	0.861702
0.241404	0.852782	0.861194
0.241553	0.852697	0.861172
0.241742	0.852535	0.861167
0.241923	0.852506	0.861238
0.242061	0.852121	0.860967
0.242183	0.851779	0.860674
0.242317	0.851276	0.860028
0.242484	0.851023	0.859818
0.242634	0.85062	0.859197
0.2428	0.850024	0.858554
0.242934	0.849857	0.858367
0.243045	0.849673	0.858075
0.243172	0.849106	0.857388
0.243318	0.84901	0.857301
0.243452	0.848957	0.857316
0.243593	0.848094	0.856444
0.24374	0.847819	0.856068
0.243875	0.847282	0.855439
0.244003	0.846971	0.855199
0.244105	0.846373	0.854545
0.244215	0.846839	0.854878
0.244335	0.846338	0.854329
0.244443	0.845968	0.853849
0.244569	0.8448	0.852626
0.244722	0.845193	0.853085
0.244872	0.844207	0.852013
0.244979	0.84261	0.850542
0.245105	0.841713	0.849837
0.245251	0.842684	0.850663
0.245425	0.840933	0.848957
0.245591	0.840314	0.848474
0.245779	0.84017	0.848399
0.245932	0.839859	0.848016
0.24605	0.839286	0.847327
0.246183	0.838001	0.846225
0.246306	0.83707	0.845365
0.246441	0.83661	0.844934
0.246591	0.836897	0.845103
0.246739	0.83663	0.84509
0.24685	0.83644	0.844809
0.246974	0.836463	0.844771
0.247103	0.835973	0.844394
0.247223	0.835098	0.843568
0.247333	0.83425	0.842712
0.247471	0.83338	0.84185
0.247607	0.83249	0.841142
0.247736	0.83211	0.841078
0.247856	0.832753	0.841533
0.248	0.8326	0.841488
0.248159	0.831472	0.840585
0.248306	0.830999	0.840337
0.248409	0.83036	0.839739
0.248531	0.829769	0.839159
0.248659	0.829775	0.839107
0.24878	0.829628	0.838779
0.248916	0.829299	0.838523
0.249033	0.828747	0.838162
0.249185	0.828802	0.838274
0.249327	0.828269	0.83797
0.249455	0.827852	0.837681
0.249604	0.828384	0.838302
0.249743	0.828014	0.837769
0.249882	0.827517	0.837435
0.250029	0.827453	0.837346
0.250159	0.826938	0.836849
0.25027	0.826721	0.836621
0.250398	0.82629	0.836239
0.250517	0.825922	0.835938
0.250652	0.825367	0.835641
0.25077	0.824071	0.834498
0.250889	0.8242	0.834699
0.251009	0.823581	0.834068
0.251154	0.823195	0.833713
0.251287	0.823201	0.833803
0.251405	0.823447	0.833997
0.251535	0.823789	0.83431
0.251703	0.824284	0.834769
0.251843	0.824726	0.835462
0.251951	0.824538	0.835237
0.252073	0.823798	0.834371
0.252184	0.823838	0.834388
0.252309	0.823764	0.83452
0.252428	0.823785	0.834668
0.252565	0.824104	0.835192
0.252696	0.824095	0.835205
0.252828	0.824464	0.835446
0.252951	0.823771	0.835356
0.253071	0.823239	0.834857
0.253195	0.822493	0.83423
0.253339	0.82241	0.834282
0.253482	0.822719	0.834602
0.253597	0.822677	0.834583
0.253711	0.823017	0.834951
0.253812	0.822702	0.834776
0.253936	0.823446	0.835596
0.254045	0.823673	0.835722
0.25416	0.823528	0.835716
0.254286	0.822929	0.835209
0.254463	0.822821	0.835178
0.254623	0.823545	0.835925
0.254766	0.82409	0.836181
0.254906	0.824518	0.836371
0.255022	0.824095	0.836042
0.255126	0.824833	0.836514
0.255242	0.82507	0.83671
0.255378	0.825218	0.83682
0.255497	0.825011	0.836784
0.25563	0.824707	0.836633
0.255786	0.824324	0.836216
0.255927	0.824226	0.836199
0.256054	0.824434	0.836429
0.256173	0.824497	0.836644
0.256281	0.824773	0.837031
0.256416	0.825684	0.837923
0.256537	0.825339	0.837407
0.256665	0.825184	0.837119
0.25679	0.825308	0.837104
0.256881	0.824863	0.836777
0.257003	0.824763	0.836848
0.257118	0.824497	0.836588
0.25724	0.824812	0.837089
0.257347	0.824877	0.837087
0.257491	0.824385	0.836759
0.257617	0.824467	0.83701
0.25778	0.823981	0.836786
0.257906	0.822922	0.835585
0.258018	0.823005	0.835714
0.25812	0.82384	0.836787
0.258227	0.824949	0.837785
0.258356	0.824791	0.837471
0.258501	0.824897	0.837553
0.258631	0.824975	0.837535
0.258732	0.824595	0.837058
0.25885	0.824145	0.836477
0.258957	0.824375	0.836921
0.259093	0.824739	0.837249
0.259205	0.825506	0.837933
0.2593	0.826115	0.838714
0.259397	0.826164	0.838877
0.259495	0.826166	0.838604
0.259625	0.825124	0.837793
0.259753	0.825289	0.838058
0.259893	0.824653	0.837427
0.260007	0.825759	0.838266
0.260121	0.826743	0.839367
0.260254	0.82744	0.84025
0.260386	0.827401	0.840185
0.260533	0.827974	0.840606
0.260665	0.827484	0.840222
0.260798	0.826979	0.839846
0.260945	0.827393	0.84025
0.261061	0.827595	0.840298
0.261156	0.827735	0.840523
0.261241	0.827447	0.840416
0.261352	0.827083	0.840235
0.26148	0.826809	0.84049
0.261579	0.826337	0.840178
0.261712	0.826656	0.840665
0.261851	0.826649	0.840822
0.261954	0.826899	0.841015
0.262054	0.827117	0.841423
0.262164	0.825929	0.840343
0.262304	0.82523	0.839765
0.262431	0.824976	0.839603
0.262551	0.824836	0.839517
0.262653	0.824929	0.83943
0.262743	0.825143	0.839852
0.262845	0.825821	0.840444
0.262987	0.82543	0.840165
0.2631	0.825545	0.840235
0.263205	0.825314	0.840192
0.263331	0.825556	0.840394
0.263461	0.826072	0.841092
0.263602	0.826633	0.841631
0.263753	0.826879	0.841816
0.263904	0.826813	0.841908
0.264027	0.826565	0.84171
0.264153	0.825898	0.841522
0.264275	0.825635	0.841335
0.264386	0.82515	0.841015
0.2645	0.825264	0.841439
0.264609	0.825247	0.841404
0.26472	0.825667	0.841662
0.264837	0.824763	0.840761
0.264959	0.824251	0.840119
0.265082	0.823366	0.839233
0.265175	0.82293	0.839073
0.265284	0.82269	0.838642
0.265408	0.822997	0.839069
0.265524	0.822762	0.838794
0.265616	0.823062	0.839366
0.265724	0.823031	0.839295
0.265862	0.823259	0.839637
0.265975	0.823566	0.840111
0.266093	0.824142	0.840669
0.266203	0.823394	0.840084
0.266311	0.824291	0.840958
0.266442	0.823662	0.840284
0.266553	0.823741	0.840574
0.266692	0.824275	0.840955
0.266791	0.825049	0.841607
0.266897	0.824366	0.841279
0.267009	0.824031	0.841412
0.267124	0.823868	0.841266
0.267238	0.823173	0.840717
0.267377	0.822154	0.839981
0.267497	0.821551	0.839604
0.267576	0.821521	0.839379
0.267671	0.820528	0.838716
0.267788	0.819953	0.838397
0.267909	0.820227	0.838671
0.268002	0.819175	0.837983
0.268129	0.818466	0.83726
0.268219	0.818767	0.837599
0.268367	0.817479	0.836652
0.268488	0.817194	0.836466
0.268605	0.816385	0.835715
0.268699	0.815265	0.834792
0.268815	0.815069	0.834724
0.268934	0.814729	0.834425
0.269046	0.815057	0.834773
0.269161	0.815012	0.834585
0.269294	0.814046	0.833655
0.269397	0.814615	0.834157
0.269486	0.813976	0.833499
0.269606	0.814228	0.833547
0.269736	0.814705	0.834141
0.26987	0.814913	0.834167
0.269977	0.814879	0.833797
0.270087	0.814647	0.833443
0.270193	0.813872	0.832685
0.270277	0.813772	0.832682
0.270379	0.813104	0.832063
0.270476	0.81323	0.83232
0.270563	0.813604	0.832838
0.27068	0.813538	0.832617
0.270796	0.813511	0.832643
0.270886	0.812475	0.831746
0.271	0.81178	0.831013
0.271138	0.811896	0.830956
0.271267	0.811769	0.830917
0.271349	0.812729	0.831675
0.271448	0.812937	0.831892
0.271551	0.813173	0.832407
0.271672	0.812336	0.832098
0.271799	0.811521	0.83123
0.271917	0.810012	0.830004
0.272033	0.810332	0.830186
0.272163	0.809285	0.829042
0.272281	0.808719	0.829004
0.272395	0.808987	0.829214
0.272484	0.80798	0.828724
0.272603	0.807679	0.828699
0.272716	0.807842	0.829039
0.272844	0.807091	0.828447
0.272945	0.806729	0.828273
0.273064	0.806336	0.827667
0.273163	0.806213	0.827487
0.273263	0.805392	0.826616
0.273349	0.805097	0.826038
0.273447	0.804953	0.825935
0.27359	0.805375	0.826129
0.273734	0.806165	0.827122
0.273858	0.806642	0.827689
0.273948	0.806552	0.827556
0.274068	0.807069	0.828152
0.274178	0.806887	0.828231
0.274275	0.806765	0.828049
0.274394	0.804962	0.826822
0.274526	0.805221	0.827339
0.274639	0.804987	0.827077
0.274759	0.805537	0.827468
0.274856	0.804609	0.826824
0.274941	0.80461	0.826922
0.275085	0.804758	0.827282
0.275206	0.804783	0.827251
0.275281	0.804629	0.827064
0.275387	0.804049	0.826681
0.275495	0.804174	0.826566
0.275581	0.804231	0.826219
0.275661	0.803865	0.825856
0.27576	0.804774	0.826907
0.275881	0.804869	0.827258
0.27598	0.804207	0.826809
0.276095	0.804366	0.827282
0.276187	0.804953	0.827974
0.276311	0.805161	0.828168
0.276411	0.805187	0.828222
0.276538	0.805205	0.828579
0.276649	0.804444	0.827878
0.276735	0.804594	0.828373
0.276819	0.80399	0.82773
0.276916	0.803163	0.827328
0.277027	0.802511	0.826986
0.277132	0.801986	0.826479
0.277226	0.801941	0.826549
0.277373	0.802749	0.827373
0.277471	0.801356	0.826439
0.277575	0.801085	0.826172
0.277705	0.800673	0.825668
0.277838	0.79996	0.825407
0.277969	0.798513	0.824362
0.278062	0.798365	0.824218
0.278173	0.797983	0.823815
0.278258	0.796862	0.82305
0.278364	0.795929	0.82249
0.278449	0.796419	0.822958
0.278551	0.796441	0.822882
0.278634	0.795968	0.822761
0.278719	0.796456	0.82312
0.278808	0.79698	0.823725
0.278921	0.795541	0.822765
0.279005	0.795922	0.822698
0.279098	0.79552	0.822505
0.279233	0.793696	0.820895
0.279326	0.792804	0.820154
0.279414	0.791867	0.819539
0.279528	0.791668	0.81941
0.279636	0.792008	0.819791
0.279752	0.791839	0.819513
0.27987	0.791267	0.819152
0.279959	0.791131	0.818839
0.280051	0.791455	0.818971
0.280154	0.790976	0.819007
0.28027	0.790252	0.818415
0.280368	0.79059	0.81867
0.280468	0.790835	0.818389
0.280574	0.790519	0.818122
0.280696	0.790308	0.818213
0.280839	0.790097	0.817984
0.280966	0.789827	0.81788
0.281087	0.789109	0.817365
0.281197	0.788089	0.816785
0.281302	0.787878	0.816672
0.281403	0.787188	0.816258
0.281503	0.787332	0.816632
0.281608	0.787009	0.816413
0.281718	0.78628	0.815973
0.281829	0.78623	0.816162
0.281914	0.78699	0.816973
0.282005	0.786333	0.816517
0.282082	0.785961	0.81664
0.282171	0.784347	0.815491
0.282257	0.783246	0.814615
0.282353	0.783252	0.814771
0.282459	0.782289	0.813856
0.282601	0.78153	0.813265
0.282694	0.781046	0.812868
0.282775	0.780156	0.812482
0.282892	0.779961	0.812621
0.282993	0.780063	0.812795
0.283091	0.779614	0.812516
0.283203	0.779517	0.81243
0.283327	0.778696	0.811758
0.283446	0.778669	0.811482
0.283548	0.778251	0.811014
0.28364	0.778164	0.810862
0.283725	0.778398	0.811163
0.28381	0.779046	0.81204
0.283923	0.779526	0.812555
0.28401	0.778786	0.812326
0.284103	0.778351	0.811917
0.284184	0.777082	0.810881
0.284279	0.776064	0.80997
0.284388	0.775301	0.809308
0.284469	0.774628	0.808883
0.284581	0.773573	0.808204
0.284701	0.772914	0.807724
0.284798	0.773453	0.807794
0.284902	0.774471	0.808426
0.285008	0.773612	0.807507
0.285123	0.773728	0.807734
0.285245	0.773166	0.807143
0.285363	0.773559	0.807699
0.285468	0.774178	0.807662
0.285563	0.774438	0.807889
0.285662	0.774755	0.808265
0.285758	0.774613	0.80833
0.285858	0.774775	0.808569
0.285938	0.775921	0.809603
0.286012	0.775409	0.809511
0.286129	0.774868	0.809098
0.286252	0.773758	0.808074
0.286334	0.773795	0.808216
0.286421	0.774574	0.808734
0.286547	0.774194	0.808073
0.28666	0.773473	0.807594
0.286765	0.772644	0.806852
0.286875	0.7725	0.806782
0.286962	0.771628	0.805983
0.28705	0.771761	0.806354
0.287165	0.772138	0.806507
0.287272	0.772535	0.807059
0.287357	0.773097	0.807431
0.287449	0.773355	0.807501
0.287547	0.773263	0.807799
0.287639	0.772736	0.807402
0.287746	0.77185	0.806569
0.287828	0.77253	0.806915
0.287928	0.772847	0.80735
0.288008	0.773116	0.80762
0.288119	0.772591	0.807021
0.28819	0.7725	0.80688
0.288273	0.771413	0.806175
0.288387	0.77051	0.805605
0.28849	0.770785	0.806027
0.288567	0.770651	0.806186
0.288638	0.769804	0.805655
0.288751	0.768641	0.805027
0.288853	0.768183	0.804659
0.288985	0.766861	0.803784
0.289077	0.765308	0.802449
0.289159	0.765197	0.802261
0.289253	0.764825	0.802275
0.289349	0.765445	0.802636
0.28946	0.765613	0.802765
0.289567	0.765739	0.802846
0.289658	0.76732	0.803749
0.289737	0.7672	0.803541
0.289831	0.76745	0.803888
0.289944	0.767821	0.804472
0.290048	0.768265	0.804796
0.290161	0.767685	0.804524
0.290258	0.7671	0.80451
0.290339	0.767251	0.804661
0.290416	0.76779	0.805154
0.290515	0.768338	0.805526
0.290621	0.767902	0.805707
0.290744	0.768528	0.806476
0.290832	0.768406	0.806437
0.290933	0.768255	0.806834
0.291038	0.768817	0.807225
0.291154	0.769752	0.808599
0.291263	0.770005	0.808913
0.291354	0.770468	0.809536
0.291452	0.770524	0.809753
0.291557	0.769715	0.809131
0.291648	0.768491	0.808272
0.29174	0.768897	0.808525
0.291823	0.769129	0.808644
0.291918	0.76832	0.807902
0.292028	0.767915	0.807746
0.292124	0.767339	0.807356
0.292237	0.767662	0.807746
0.29233	0.767469	0.807352
0.292414	0.766682	0.806575
0.292502	0.766433	0.806187
0.292572	0.766765	0.806431
0.292663	0.76782	0.806892
0.292737	0.767733	0.806857
0.292842	0.767064	0.806575
0.29295	0.765896	0.8055
0.293059	0.765387	0.80531
0.293147	0.765592	0.805701
0.293247	0.764803	0.804946
0.29333	0.763061	0.80424
0.293427	0.763792	0.804935
0.293497	0.763939	0.805343
0.293585	0.763634	0.80489
0.293673	0.761803	0.803583
0.293782	0.761279	0.803171
0.293901	0.761465	0.803288
0.293991	0.761271	0.803385
0.294076	0.761125	0.803143
0.294171	0.761129	0.803088
0.294282	0.76114	0.803052
0.294388	0.761612	0.803826
0.294488	0.761047	0.80359
0.294569	0.760958	0.803191
0.294654	0.759493	0.802749
0.294758	0.758827	0.802379
0.294847	0.758337	0.802137
0.294934	0.758852	0.802689
0.295036	0.758233	0.802647
0.295133	0.757377	0.801659
0.295231	0.757021	0.801519
0.29531	0.755879	0.80061
0.29542	0.755867	0.800773
0.29551	0.755638	0.800797
0.295598	0.755127	0.800265
0.295684	0.753559	0.799227
0.295777	0.752597	0.798559
0.295913	0.752494	0.798751
0.296004	0.751825	0.798325
0.296094	0.750888	0.797667
0.296172	0.749824	0.797094
0.29625	0.75022	0.797844
0.296318	0.750376	0.797915
0.29642	0.750912	0.7986
0.296511	0.750675	0.798869
0.296616	0.75073	0.799459
0.296717	0.750863	0.799341
0.296822	0.749417	0.798561
0.296917	0.74859	0.797786
0.297031	0.747626	0.7973
0.297125	0.748001	0.797839
0.297241	0.748593	0.79826
0.297334	0.748393	0.798255
0.297419	0.747284	0.797502
0.297503	0.746082	0.79686
0.297596	0.745027	0.796116
0.297672	0.744372	0.796103
0.297756	0.74401	0.796026
0.297835	0.74361	0.795856
0.297931	0.743143	0.795607
0.298022	0.743213	0.79557
0.298138	0.743002	0.795559
0.298212	0.742916	0.795625
0.298293	0.742828	0.795656
0.298394	0.74296	0.795301
0.298471	0.742205	0.794992
0.29857	0.743426	0.795843
0.298667	0.743622	0.795997
0.298751	0.743994	0.796339
0.298829	0.743638	0.795899
0.298937	0.742671	0.795427
0.299021	0.742191	0.795425
0.299122	0.742429	0.795618
0.299215	0.740842	0.794646
0.299291	0.741209	0.794945
0.299386	0.740599	0.794371
0.299455	0.741103	0.794671
0.299545	0.740238	0.794259
0.299632	0.739824	0.793848
0.299741	0.73951	0.793376
0.299823	0.740171	0.793959
0.2999	0.739912	0.793761
0.29996	0.740409	0.794492
0.300053	0.740523	0.794791
0.300166	0.739719	0.793723
0.30027	0.740939	0.794958
0.300355	0.741229	0.795438
0.300453	0.739604	0.794362
0.30056	0.737896	0.792619
0.300657	0.738254	0.792261
0.300775	0.736905	0.790849
0.300884	0.737644	0.790137
0.300962	0.737883	0.790159
0.301037	0.737923	0.790419
0.301128	0.73716	0.790082
0.30123	0.735928	0.7892
0.301308	0.735309	0.788484
0.30137	0.735583	0.788785
0.301462	0.735558	0.788483
0.301544	0.734812	0.78792
0.301628	0.733902	0.787454
0.301715	0.732307	0.78602
0.30178	0.732827	0.786576
0.301852	0.731223	0.785602
0.30195	0.729761	0.785061
0.302033	0.728007	0.783744
0.302154	0.726627	0.782781
0.302261	0.724828	0.781645
0.302355	0.72475	0.78149
0.302453	0.723853	0.780739
0.302551	0.723957	0.781169
0.302647	0.723918	0.780825
0.302741	0.722905	0.780438
0.30281	0.722889	0.780471
0.302893	0.722544	0.780208
0.30298	0.721972	0.779545
0.303082	0.721268	0.778996
0.303179	0.720552	0.77833
0.303279	0.719055	0.777194
0.303366	0.717776	0.776435
0.303435	0.71607	0.775352
0.303533	0.714279	0.774578
0.303621	0.712919	0.773442
0.303723	0.712243	0.772696
0.303808	0.712028	0.772866
0.303887	0.712866	0.773065
0.303967	0.712628	0.772769
0.304054	0.712741	0.772649
0.304143	0.711565	0.771174
0.304239	0.711476	0.771122
0.304332	0.711298	0.771374
0.304406	0.710766	0.771959
0.3045	0.710054	0.771683
0.304572	0.709531	0.771114
0.304634	0.70882	0.770303
0.304722	0.708598	0.770298
0.304831	0.709104	0.77086
0.304927	0.708879	0.771102
0.30503	0.708839	0.771352
0.305116	0.70823	0.770893
0.30521	0.708237	0.770902
0.305316	0.708435	0.771198
0.305427	0.707624	0.770922
0.305519	0.706828	0.770354
0.305613	0.705982	0.769833
0.305679	0.705491	0.769531
0.305773	0.705654	0.769538
0.305873	0.705199	0.769295
0.30596	0.70529	0.769381
0.306037	0.704815	0.76938
0.306123	0.704984	0.769424
0.306222	0.703833	0.768254
0.306307	0.702426	0.767034
0.306389	0.702287	0.766788
0.306463	0.70184	0.766541
0.30654	0.70184	0.766666
0.306635	0.701199	0.766528
0.306726	0.700094	0.764961
0.306816	0.700332	0.765277
0.306896	0.699538	0.765017
0.306967	0.699711	0.764909
0.307046	0.699468	0.765098
0.307129	0.699554	0.765216
0.307213	0.698024	0.764099
0.307301	0.696378	0.762718
0.30739	0.695497	0.762767
0.307474	0.694753	0.762162
0.307585	0.693754	0.761456
0.307674	0.693904	0.761259
0.307764	0.691867	0.759925
0.307842	0.691059	0.759254
0.307929	0.690627	0.758826
0.308017	0.689867	0.758137
0.308066	0.689652	0.757891
0.308144	0.68917	0.757597
0.308238	0.688207	0.757215
0.308322	0.688519	0.757378
0.308401	0.687455	0.756067
0.308482	0.688529	0.756826
0.308549	0.688675	0.757325
0.308636	0.689224	0.758089
0.308708	0.688919	0.757619
0.308779	0.688085	0.757208
0.308872	0.686642	0.755954
0.308964	0.686464	0.755491
0.309067	0.686843	0.756519
0.309149	0.68398	0.754064
0.309218	0.682311	0.752486
0.309328	0.682198	0.752243
0.309424	0.681857	0.751584
0.309502	0.680882	0.750774
0.309598	0.681375	0.751378
0.309691	0.67895	0.750677
0.309795	0.676742	0.749297
0.30989	0.676627	0.748664
0.309998	0.676308	0.748355
0.310079	0.677029	0.748545
0.310175	0.676547	0.748807
0.310247	0.67576	0.748053
0.310321	0.674884	0.747488
0.310394	0.673592	0.746713
0.310478	0.674248	0.74734
0.310549	0.674135	0.747393
0.31064	0.6726	0.746761
0.310702	0.672906	0.747145
0.310768	0.671196	0.745907
0.310848	0.671734	0.746443
0.310934	0.671567	0.746321
0.311025	0.673453	0.747941
0.311105	0.673577	0.748016
0.311178	0.673372	0.748383
0.311269	0.672541	0.74811
0.311356	0.673169	0.748482
0.311435	0.673441	0.748707
0.311511	0.672553	0.747774
0.31158	0.670987	0.74705
0.311676	0.67135	0.747717
0.311773	0.670555	0.746981
0.311864	0.669492	0.746441
0.311963	0.670075	0.747137
0.312067	0.670377	0.747383
0.312157	0.671091	0.748474
0.312239	0.671309	0.748436
0.312337	0.671276	0.747991
0.312415	0.67116	0.747529
0.312486	0.670925	0.747755
0.312586	0.669255	0.747071
0.312685	0.66729	0.746183
0.312743	0.667565	0.746592
0.312821	0.666386	0.7466
0.312906	0.666711	0.74658
0.313007	0.667071	0.747213
0.313103	0.666164	0.74552
0.31319	0.666516	0.7455
0.313281	0.664886	0.744635
0.313377	0.664237	0.744707
0.313467	0.664103	0.744545
0.31354	0.662894	0.743392
0.313622	0.66282	0.743386
0.313706	0.662067	0.742717
0.313795	0.661535	0.742461
0.313883	0.660061	0.741233
0.313955	0.658203	0.740032
0.314034	0.657508	0.739324
0.314103	0.657029	0.739512
0.314157	0.657274	0.73974
0.314224	0.656457	0.73906
0.314304	0.654272	0.737763
0.314422	0.653798	0.737442
0.3145	0.652636	0.736867
0.314589	0.652651	0.737182
0.31468	0.651389	0.736517
0.314751	0.650985	0.737074
0.314842	0.650555	0.736947
0.314925	0.648908	0.736025
0.315006	0.648127	0.73592
0.315071	0.647398	0.734962
0.315147	0.64605	0.734054
0.315224	0.645375	0.733955
0.31533	0.644986	0.733749
0.315424	0.643834	0.733221
0.315505	0.643075	0.73324
0.315571	0.641433	0.731988
0.315646	0.640617	0.73166
0.31572	0.640072	0.73147
0.315808	0.639308	0.730729
0.315897	0.638491	0.729951
0.315974	0.638477	0.729873
0.316039	0.637817	0.729735
0.316128	0.636439	0.729362
0.316214	0.636607	0.729242
0.316298	0.63592	0.729596
0.316368	0.634931	0.72918
0.316443	0.635229	0.728629
0.316528	0.635852	0.729052
0.316609	0.634946	0.728356
0.316679	0.63492	0.727713
0.316764	0.633648	0.727061
0.316847	0.631754	0.726453
0.316914	0.630594	0.725916
0.317003	0.630816	0.72586
0.317106	0.630352	0.724683
0.317192	0.628836	0.723398
0.317299	0.62798	0.72258
0.317391	0.626495	0.721192
0.317481	0.626138	0.721179
0.317575	0.624747	0.720149
0.317663	0.625396	0.720335
0.317727	0.624467	0.71957
0.317783	0.624607	0.719963
0.31785	0.624414	0.720276
0.317933	0.623718	0.719881
0.318018	0.624209	0.720039
0.318102	0.626184	0.721048
0.318196	0.626189	0.72172
0.318279	0.624508	0.72117
0.318341	0.625339	0.722045
0.31843	0.623833	0.720873
0.318501	0.623068	0.719875
0.31859	0.622589	0.719845
0.318677	0.620997	0.71858
0.318753	0.621678	0.718969
0.318816	0.620468	0.718069
0.318873	0.621366	0.718743
0.31895	0.62061	0.717849
0.319026	0.618907	0.716483
0.319101	0.62011	0.717565
0.319178	0.619169	0.716686
0.319271	0.619899	0.717483
0.319349	0.619242	0.716714
0.319428	0.618631	0.716764
0.319505	0.617641	0.715164
0.319604	0.617545	0.714649
0.319676	0.616854	0.714364
0.319761	0.614521	0.712635
0.319838	0.613422	0.712359
0.319938	0.612907	0.711894
0.32002	0.610856	0.710226
0.320091	0.60973	0.709479
0.320148	0.608585	0.708858
0.320222	0.60669	0.707446
0.320311	0.605891	0.707018
0.320386	0.604223	0.705533
0.320447	0.603312	0.7044
0.320518	0.603414	0.704842
0.320583	0.603839	0.705362
0.320652	0.601848	0.703573
0.320736	0.599919	0.702334
0.320837	0.600382	0.702554
0.320928	0.598975	0.701586
0.321015	0.598695	0.70143
0.321087	0.598678	0.701032
0.321166	0.595985	0.699101
0.321254	0.594212	0.698597
0.321329	0.592413	0.69782
0.32142	0.590478	0.696198
0.321514	0.589828	0.696012
0.321585	0.587881	0.695222
0.321656	0.586098	0.694393
0.321723	0.583389	0.693217
0.321805	0.581838	0.692471
0.321894	0.579764	0.691777
0.32197	0.578946	0.691812
0.322052	0.578104	0.691921
0.32213	0.5785	0.693045
0.322203	0.577657	0.692233
0.322305	0.574874	0.690754
0.322383	0.576367	0.691573
0.322479	0.575838	0.691056
0.322585	0.574036	0.690256
0.32266	0.574324	0.689871
0.322737	0.573549	0.688971
0.322811	0.573101	0.689097
0.322885	0.572125	0.688546
0.322959	0.571064	0.688504
0.323055	0.570875	0.688878
0.323132	0.570685	0.688614
0.323217	0.57052	0.689193
0.323301	0.570337	0.688568
0.323393	0.569766	0.688961
0.323473	0.569304	0.688939
0.323546	0.570531	0.689509
0.323606	0.569155	0.688851
0.32368	0.571779	0.690189
0.323762	0.569834	0.688616
0.323858	0.56917	0.687933
0.323944	0.568006	0.687643
0.324017	0.56771	0.687673
0.32409	0.567334	0.688325
0.324164	0.566587	0.688222
0.324225	0.566614	0.687409
0.324313	0.56624	0.687109
0.324378	0.566498	0.687179
0.324462	0.566886	0.688346
0.324529	0.566546	0.68873
0.324619	0.56386	0.686378
0.324692	0.564069	0.686342
0.324785	0.563367	0.68636
0.324867	0.561699	0.684964
0.324939	0.561864	0.684852
0.325006	0.561234	0.6839
0.325078	0.559548	0.682541
0.325172	0.558133	0.681956
0.325237	0.560081	0.683238
0.325301	0.560036	0.683105
0.325375	0.560133	0.68366
0.325433	0.559151	0.683115
0.3255	0.55763	0.6818
0.325576	0.557559	0.681928
0.325644	0.560401	0.684696
0.325715	0.561202	0.684693
0.325802	0.562911	0.684902
0.325877	0.562539	0.685002
0.325942	0.561421	0.684481
0.326017	0.560283	0.684196
0.326089	0.559577	0.683039
0.326147	0.560224	0.682715
0.32623	0.556954	0.679839
0.326308	0.556967	0.679585
0.326391	0.555921	0.679259
0.326462	0.554573	0.677502
0.326544	0.555671	0.678028
0.326619	0.55582	0.677382
0.326689	0.555738	0.677281
0.32676	0.554888	0.676974
0.32684	0.555263	0.676737
0.326925	0.555651	0.67702
0.327002	0.554237	0.675544
0.32709	0.554251	0.675339
0.327184	0.553329	0.674086
0.327249	0.551603	0.672492
0.327359	0.550331	0.671032
0.327445	0.549048	0.670723
0.327523	0.547698	0.669531
0.327602	0.54552	0.668023
0.327704	0.545516	0.667482
0.32777	0.543726	0.665748
0.327845	0.541741	0.663988
0.32792	0.541537	0.664064
0.327993	0.539577	0.662552
0.328063	0.53948	0.66207
0.328136	0.539753	0.662896
0.328188	0.537228	0.661168
0.328256	0.535934	0.659975
0.328327	0.535203	0.659408
0.328384	0.532983	0.658044
0.32846	0.529472	0.656033
0.328526	0.529067	0.65637
0.328614	0.528684	0.656132
0.328697	0.526734	0.654182
0.328766	0.524705	0.652274
0.328854	0.522286	0.649715
0.328932	0.519081	0.648109
0.329018	0.518125	0.647542
0.329098	0.516781	0.646325
0.329159	0.514446	0.644847
0.329236	0.514844	0.645141
0.329316	0.512658	0.642984
0.32939	0.512227	0.642242
0.329471	0.511702	0.641503
0.329546	0.512117	0.641127
0.329627	0.511079	0.640212
0.329702	0.512314	0.640175
0.329794	0.513701	0.64128
0.329871	0.515228	0.641691
0.329951	0.512881	0.639852
0.330005	0.512613	0.63974
0.33007	0.513582	0.640448
0.330125	0.510009	0.637875
0.330207	0.509991	0.637782
0.330277	0.509783	0.63791
0.330348	0.509786	0.638252
0.330446	0.509368	0.637872
0.330533	0.507656	0.636138
0.330618	0.506188	0.634734
0.330678	0.505796	0.634642
0.330755	0.505301	0.633568
0.330818	0.506684	0.634379
0.330882	0.504793	0.633366
0.33096	0.504484	0.634286
0.331027	0.506362	0.635993
0.331096	0.506673	0.636642
0.331168	0.505235	0.635156
0.33124	0.504654	0.63501
0.331324	0.500745	0.634177
0.331408	0.50135	0.63524
0.3315	0.501745	0.636341
0.331584	0.502519	0.637612
0.331642	0.502429	0.637962
0.331723	0.502276	0.637738
0.331814	0.503958	0.63855
0.3319	0.503046	0.639046
0.331971	0.503198	0.639719
0.332047	0.504284	0.640586
0.332134	0.50318	0.639498
0.332214	0.501983	0.639084
0.332282	0.502157	0.640111
0.33236	0.500449	0.638963
0.332427	0.498648	0.637333
0.332478	0.501	0.638848
0.332553	0.50007	0.639014
0.332621	0.499558	0.639861
0.332692	0.499608	0.639334
0.332754	0.49931	0.639243
0.332838	0.497985	0.638516
0.332937	0.49693	0.637675
0.333011	0.497029	0.638274
0.333065	0.495729	0.637914
0.333121	0.497877	0.639305
0.333184	0.497666	0.639485
0.333253	0.496561	0.638002
0.33332	0.494838	0.637631
0.333384	0.494286	0.637927
0.333452	0.494248	0.637844
0.333509	0.493574	0.636271
0.33359	0.491038	0.633818
0.333681	0.490677	0.632948
0.333765	0.489922	0.632385
0.333831	0.490981	0.633571
0.333909	0.491262	0.633767
0.334	0.490733	0.632973
0.33407	0.49019	0.632547
0.33415	0.489652	0.632277
0.334223	0.489135	0.632169
0.334291	0.486774	0.630521
0.334351	0.48595	0.62912
0.334433	0.483831	0.627846
0.334495	0.48278	0.627898
0.334581	0.481613	0.62703
0.334675	0.479924	0.625927
0.334738	0.478435	0.624036
0.33481	0.476739	0.622575
0.334888	0.47494	0.621832
0.334948	0.475237	0.622483
0.335013	0.47378	0.621829
0.335079	0.471701	0.620012
0.335167	0.469789	0.619241
0.335256	0.468377	0.618488
0.335323	0.467207	0.618686
0.335388	0.466097	0.618119
0.335486	0.466254	0.618434
0.335571	0.465194	0.617817
0.335651	0.464898	0.616846
0.335732	0.46522	0.616949
0.335813	0.463554	0.615537
0.335866	0.461303	0.614255
0.335922	0.460549	0.613488
0.336005	0.460756	0.613202
0.336075	0.459079	0.610983
0.336141	0.458593	0.61029
0.336214	0.456525	0.608078
0.336279	0.456938	0.608198
0.336352	0.458044	0.60905
0.336429	0.457228	0.608297
0.336495	0.45737	0.60823
0.336568	0.457412	0.607929
0.336624	0.457313	0.607516
0.3367	0.456663	0.607675
0.336786	0.456933	0.607273
0.336874	0.457607	0.607175
0.33694	0.458796	0.607761
0.337012	0.459293	0.607915
0.337084	0.458134	0.607101
0.337156	0.45772	0.607692
0.337237	0.454979	0.605284
0.337306	0.453217	0.604196
0.337367	0.452047	0.602796
0.337418	0.453153	0.60202
0.337496	0.452371	0.600671
0.337566	0.453142	0.601822
0.337652	0.452083	0.600682
0.337724	0.452914	0.600247
0.337783	0.451324	0.599299
0.337848	0.449343	0.598838
0.33791	0.449281	0.598937
0.337969	0.449148	0.599216
0.338039	0.449333	0.598965
0.338104	0.450207	0.599894
0.338176	0.447644	0.598481
0.338242	0.448716	0.598877
0.338328	0.449317	0.600163
0.338416	0.447383	0.599067
0.338487	0.445738	0.597677
0.338559	0.446334	0.598028
0.338633	0.446418	0.598077
0.338688	0.446149	0.597025
0.338762	0.445243	0.596215
0.338831	0.445313	0.596402
0.338908	0.444124	0.595499
0.338976	0.444488	0.595564
0.339059	0.443548	0.595051
0.339129	0.440962	0.595088
0.339195	0.440101	0.594171
0.339254	0.439431	0.594517
0.33932	0.436199	0.593006
0.339395	0.435709	0.592421
0.339453	0.434222	0.590742
0.339524	0.434133	0.589914
0.3396	0.433867	0.589385
0.339674	0.435263	0.590909
0.339733	0.433807	0.590024
0.339811	0.435717	0.590991
0.339901	0.435236	0.589281
0.339977	0.437245	0.591318
0.340032	0.437018	0.590963
0.340105	0.435967	0.590639
0.340186	0.43702	0.59211
0.340262	0.436629	0.590738
0.340323	0.437883	0.590914
0.340391	0.438168	0.59091
0.340469	0.438103	0.591682
0.340532	0.437127	0.590368
0.340623	0.436714	0.589412
0.340696	0.43528	0.588685
0.340752	0.434723	0.587633
0.340824	0.432137	0.58699
0.340897	0.431871	0.587481
0.340965	0.432395	0.587958
0.341071	0.432391	0.587546
0.341146	0.43273	0.586647
0.3412	0.430772	0.585246
0.341263	0.431523	0.585165
0.341322	0.431026	0.585264
0.341403	0.428722	0.583739
0.341466	0.426086	0.581652
0.34153	0.426613	0.582336
0.341594	0.424691	0.581044
0.341655	0.422385	0.58031
0.341715	0.421043	0.579082
0.341785	0.420773	0.579828
0.341858	0.420021	0.579213
0.341933	0.41925	0.579391
0.342008	0.419822	0.580415
0.342095	0.420199	0.580368
0.34215	0.416086	0.5781
0.342211	0.41563	0.577808
0.342286	0.416646	0.578162
0.34237	0.417445	0.57823
0.342452	0.415739	0.577156
0.342515	0.415996	0.576728
0.342582	0.416194	0.57613
0.342643	0.416123	0.576642
0.342715	0.415685	0.576228
0.342779	0.413271	0.57379
0.342862	0.411995	0.572221
0.342934	0.411605	0.571899
0.34301	0.411174	0.571161
0.343075	0.411144	0.569683
0.343145	0.410277	0.568288
0.343214	0.4096	0.568982
0.343269	0.409229	0.569524
0.343336	0.409216	0.569779
0.343421	0.408385	0.569248
0.343491	0.406736	0.568368
0.343555	0.406891	0.568264
0.343647	0.405962	0.566962
0.343728	0.405898	0.566741
0.343788	0.406566	0.566311
0.343846	0.406194	0.564638
0.343914	0.406957	0.565378
0.34397	0.404465	0.564446
0.344023	0.402727	0.563631
0.34409	0.400024	0.56105
0.344177	0.400599	0.561062
0.344236	0.400984	0.560219
0.344307	0.400481	0.559134
0.344381	0.399792	0.557935
0.344459	0.400922	0.557429
0.34453	0.398575	0.556566
0.34459	0.397982	0.555605
0.344649	0.398071	0.554685
0.344736	0.400259	0.556182
0.344814	0.399202	0.555558
0.344898	0.400536	0.555462
0.344965	0.401762	0.555088
0.345043	0.400602	0.554924
0.345109	0.400786	0.554435
0.345177	0.400583	0.553951
0.345248	0.399478	0.553029
0.345311	0.40132	0.554078
0.345381	0.402577	0.554879
0.345443	0.403968	0.554386
0.3455	0.403015	0.552902
0.345575	0.401347	0.551648
0.345643	0.3992	0.550806
0.345703	0.398228	0.549638
0.345771	0.399304	0.551685
0.345844	0.399657	0.553868
0.345924	0.397444	0.551419
0.345989	0.397817	0.552075
0.346054	0.397681	0.552266
0.346114	0.39985	0.552973
0.346171	0.399719	0.551434
0.346238	0.400737	0.552648
0.346308	0.400241	0.55117
0.346374	0.401305	0.550756
0.346439	0.401302	0.551299
0.346529	0.402562	0.552904
0.34658	0.400857	0.551447
0.346649	0.401407	0.552233
0.346711	0.401711	0.550576
0.346764	0.39987	0.549206
0.346831	0.398463	0.548408
0.346893	0.398026	0.548486
0.346956	0.394738	0.547145
0.347033	0.394791	0.546463
0.347095	0.393332	0.545084
0.347169	0.391463	0.543502
0.347224	0.388799	0.543009
0.347287	0.388503	0.5431
0.34736	0.38646	0.542957
0.347439	0.384717	0.541755
0.347508	0.385286	0.541829
0.347584	0.384398	0.540834
0.347631	0.382714	0.539272
0.347708	0.381252	0.539066
0.347778	0.380755	0.538515
0.347847	0.381863	0.537919
0.347936	0.381986	0.537332
0.348008	0.378801	0.535534
0.348069	0.376544	0.533811
0.348133	0.376896	0.533704
0.348199	0.375755	0.533181
0.348279	0.372925	0.533172
0.34835	0.372444	0.533563
0.348407	0.370848	0.533041
0.348459	0.368703	0.531042
0.348545	0.368309	0.531171
0.348624	0.369668	0.532713
0.348683	0.369926	0.532257
0.34874	0.370906	0.532137
0.348805	0.371557	0.53308
0.34887	0.37031	0.531838
0.34895	0.370094	0.532059
0.349024	0.368123	0.532068
0.349094	0.369895	0.531927
0.349162	0.369895	0.530672
0.349234	0.368268	0.529713
0.349294	0.36882	0.531011
0.349357	0.370918	0.532526
0.349413	0.370983	0.533366
0.349482	0.369126	0.531764
0.349561	0.368481	0.531221
0.349628	0.366671	0.52979
0.349703	0.366837	0.530695
0.349775	0.366291	0.531661
0.34983	0.365921	0.531478
0.349903	0.367295	0.531983
0.349973	0.364179	0.531155
0.350027	0.362236	0.530324
0.350082	0.361881	0.528937
0.350144	0.359743	0.52581
0.350208	0.360072	0.525673
0.350276	0.359801	0.526131
0.350325	0.358624	0.524931
0.350398	0.357787	0.52358
0.350476	0.35902	0.524343
0.350527	0.358471	0.52365
0.350596	0.357735	0.522603
0.350666	0.357619	0.523222
0.350731	0.356049	0.521643
0.350782	0.355489	0.520602
0.350841	0.356666	0.520937
0.350897	0.356121	0.521052
0.350966	0.355586	0.520226
0.351043	0.353487	0.518408
0.351099	0.35497	0.519214
0.351177	0.355506	0.51938
0.351231	0.353917	0.518702
0.351297	0.355299	0.517007
0.351375	0.354249	0.516282
0.351445	0.35384	0.514488
0.351515	0.350366	0.512023
0.351579	0.350058	0.512943
0.351649	0.347059	0.512336
0.351714	0.343183	0.509871
0.35177	0.342867	0.507954
0.351847	0.342726	0.507736
0.351925	0.340703	0.505782
0.351997	0.341649	0.50734
0.352066	0.340512	0.505372
0.352146	0.338247	0.503091
0.352218	0.333521	0.500891
0.352275	0.332449	0.500856
0.352342	0.333748	0.502085
0.352408	0.332576	0.502433
0.352472	0.335046	0.504102
0.352535	0.33336	0.501438
0.352594	0.331643	0.498624
0.352666	0.330304	0.498542
0.352725	0.331764	0.499043
0.352788	0.329548	0.497535
0.352842	0.328165	0.497878
0.352906	0.328408	0.498857
0.352983	0.326318	0.498658
0.353042	0.324361	0.497812
0.353108	0.323301	0.496335
0.353165	0.320866	0.493167
0.353237	0.319717	0.492209
0.353309	0.317845	0.491094
0.353385	0.317653	0.49096
0.353444	0.31509	0.490552
0.353506	0.315376	0.491106
0.353562	0.312873	0.489027
0.353624	0.311917	0.487948
0.353701	0.310374	0.486406
0.353779	0.308886	0.486646
0.353841	0.309056	0.48605
0.353906	0.309299	0.486038
0.353992	0.311669	0.486882
0.354046	0.311312	0.486032
0.354136	0.310659	0.484517
0.354213	0.310337	0.483045
0.354274	0.309122	0.482453
0.354336	0.307641	0.481169
0.354394	0.306635	0.480344
0.354445	0.307376	0.479966
0.354512	0.30935	0.480116
0.354579	0.306166	0.478656
0.354631	0.304511	0.47754
0.354705	0.304317	0.477503
0.35477	0.304601	0.478986
0.354856	0.305638	0.481069
0.354928	0.305629	0.482011
0.354985	0.305732	0.481664
0.355043	0.306431	0.481473
0.355107	0.30776	0.482322
0.35518	0.306581	0.482472
0.355228	0.305762	0.48279
0.355296	0.30633	0.481831
0.355357	0.306991	0.480665
0.355437	0.306715	0.480509
0.355507	0.306733	0.478922
0.35558	0.306929	0.478516
0.35565	0.305139	0.47734
0.355709	0.306649	0.477209
0.35579	0.305634	0.476279
0.355879	0.30674	0.477349
0.355935	0.309008	0.478888
0.35598	0.306752	0.477568
0.356046	0.30488	0.476274
0.356107	0.302086	0.473654
0.356152	0.302179	0.473012
0.356213	0.301376	0.471369
0.356286	0.300434	0.470632
0.356351	0.299663	0.469936
0.356422	0.299422	0.467723
0.356488	0.300064	0.467926
0.356548	0.29574	0.465801
0.35661	0.295734	0.465661
0.356666	0.295206	0.465172
0.356711	0.293366	0.463618
0.356764	0.293294	0.463295
0.356843	0.293044	0.462796
0.356906	0.292475	0.460474
0.356953	0.291521	0.459407
0.357014	0.292015	0.459213
0.357056	0.290161	0.456712
0.357097	0.287677	0.454732
0.357149	0.287822	0.455146
0.357215	0.287254	0.45474
0.357281	0.287322	0.454932
0.357348	0.288838	0.455155
0.35742	0.286346	0.452953
0.357484	0.287867	0.454002
0.357536	0.289236	0.454807
0.357596	0.290345	0.454979
0.357677	0.289358	0.453988
0.357755	0.288186	0.452296
0.357838	0.289843	0.453328
0.357905	0.288762	0.452787
0.357959	0.289487	0.452886
0.358031	0.288368	0.453158
0.3581	0.291936	0.454401
0.358146	0.291542	0.452686
0.358205	0.2907	0.451918
0.358262	0.290974	0.451306
0.358315	0.29238	0.45266
0.358383	0.292858	0.4526
0.35845	0.294821	0.454756
0.358537	0.294741	0.453191
0.358614	0.295572	0.45392
0.358678	0.292882	0.453188
0.358742	0.294519	0.453674
0.358801	0.294117	0.452121
0.358856	0.293347	0.451301
0.358916	0.294579	0.451216
0.358981	0.292443	0.451771
0.359041	0.293319	0.453339
0.359095	0.296266	0.453916
0.359154	0.299199	0.455534
0.359229	0.297029	0.454537
0.359299	0.298817	0.456335
0.359354	0.29963	0.456122
0.359417	0.299145	0.45397
0.359488	0.298858	0.451453
0.359548	0.298509	0.451077
0.35962	0.297159	0.451402
0.359676	0.297949	0.45247
0.359729	0.296145	0.451017
0.359784	0.297707	0.451855
0.359839	0.295597	0.449321
0.359905	0.295135	0.448517
0.359975	0.294322	0.449038
0.360028	0.293399	0.447549
0.360097	0.292632	0.447931
0.360173	0.293717	0.446954
0.360241	0.294007	0.447151
0.360307	0.291713	0.44516
0.360358	0.29043	0.444844
0.360418	0.28777	0.44337
0.360471	0.286486	0.442686
0.36054	0.287534	0.442173
0.36059	0.286706	0.442425
0.360657	0.283246	0.440506
0.360706	0.283867	0.441093
0.36076	0.281405	0.439786
0.360826	0.279515	0.438481
0.360875	0.277761	0.437439
0.360963	0.278571	0.438069
0.361036	0.276546	0.437079
0.361103	0.276464	0.436464
0.361172	0.278168	0.43631
0.361251	0.27571	0.434896
0.361319	0.272662	0.43293
0.361397	0.274213	0.431945
0.361454	0.273459	0.431546
0.361535	0.271519	0.429792
0.361598	0.272659	0.430417
0.361654	0.273351	0.43045
0.361716	0.271925	0.429312
0.361789	0.270678	0.429793
0.361861	0.268908	0.427829
0.361922	0.266876	0.427074
0.361986	0.266794	0.428735
0.362038	0.267392	0.428841
0.362102	0.265135	0.427969
0.362183	0.266012	0.429201
0.362252	0.263965	0.428835
0.362309	0.262592	0.429407
0.362378	0.26235	0.42895
0.36245	0.261268	0.427463
0.362493	0.260496	0.426934
0.36256	0.25843	0.426184
0.36261	0.257204	0.426394
0.362685	0.256563	0.425788
0.362751	0.254998	0.424513
0.36281	0.252969	0.423209
0.362872	0.249768	0.419768
0.362935	0.25312	0.420305
0.362989	0.253915	0.419187
0.363034	0.254242	0.419212
0.363086	0.255213	0.419453
0.363144	0.25563	0.419487
0.363212	0.254761	0.417617
0.363279	0.255266	0.418109
0.363345	0.257237	0.418293
0.363409	0.256974	0.419451
0.363474	0.257321	0.419441
0.363544	0.259193	0.42041
0.363619	0.259652	0.421064
0.36369	0.260119	0.421402
0.363754	0.259397	0.420707
0.363817	0.260439	0.4218
0.363873	0.261494	0.421289
0.363913	0.260934	0.419454
0.363961	0.260439	0.41877
0.36401	0.259744	0.418176
0.364074	0.260309	0.417688
0.364148	0.261336	0.416963
0.36421	0.261728	0.415844
0.36427	0.261361	0.417467
0.364316	0.261772	0.41761
0.36437	0.262658	0.418388
0.364418	0.260596	0.417685
0.364473	0.261124	0.41813
0.364521	0.261364	0.417256
0.364576	0.262353	0.417051
0.364632	0.263265	0.418415
0.364696	0.264284	0.419489
0.364751	0.265134	0.417925
0.364808	0.263295	0.417389
0.36487	0.261818	0.416798
0.364943	0.264497	0.418295
0.365038	0.26617	0.418758
0.365106	0.268428	0.42044
0.365156	0.2705	0.421909
0.365213	0.270776	0.421495
0.365274	0.273116	0.420686
0.365332	0.272511	0.41966
0.365402	0.269021	0.418456
0.365472	0.268936	0.418523
0.365532	0.268631	0.418149
0.365598	0.267609	0.41686
0.36565	0.265416	0.416675
0.365717	0.262718	0.415574
0.365781	0.261349	0.415177
0.365848	0.260055	0.41256
0.365918	0.258293	0.410197
0.365984	0.258304	0.409593
[truncated: 23,921 more rows]

## Sheet: FigS4FH
25 mol% DOPS, 5 mol% PI(4,5)P2, and 5 mol% cholesterol
	Resolution (1/A)	map M4 A: masked	map M4 A: corrected	map M4 A: phase randomized		Resolution (1/A)	map M4 B: masked	map M4 B: corrected	map M4 B: phase randomized		Resolution (1/A)	map M4 C: masked	map M4 C: corrected	map M4 C: phase randomized
	0.00193	1	1			0.00193	1	1			0.00193	1	1
	0.00579	1	1	1		0.00579	1	1	1		0.00579	1	1
	0.00965	1	1	1		0.00965	1	1	1		0.00965	1	1	1
	0.0135	1	1	1		0.0135	0.99999	0.99999	0.99999		0.0135	1	1	1
	0.01736	0.99999	0.99999	0.99999		0.01736	0.99997	0.99997	0.99997		0.01736	0.99999	0.99999	0.99999
	0.02122	0.99999	0.99999	0.99999		0.02122	0.99995	0.99995	0.99995		0.02122	0.99999	0.99999	0.99999
	0.02508	0.99998	0.99998	0.99998		0.02508	0.99991	0.99991	0.99991		0.02508	0.99998	0.99998	0.99998
	0.02894	0.99997	0.99997	0.99997		0.02894	0.99985	0.99985	0.99985		0.02894	0.99997	0.99997	0.99997
	0.03279	0.99995	0.99995	0.99995		0.03279	0.99979	0.99979	0.99979		0.03279	0.99995	0.99995	0.99995
	0.03665	0.9999	0.9999	0.9999		0.03665	0.99966	0.99966	0.99965		0.03665	0.99993	0.99993	0.99992
	0.04051	0.99985	0.99985	0.99985		0.04051	0.99945	0.99945	0.99945		0.04051	0.99989	0.99989	0.99989
	0.04437	0.9998	0.9998	0.9998		0.04437	0.99904	0.99904	0.99904		0.04437	0.99983	0.99983	0.99983
	0.04823	0.99968	0.99968	0.99968		0.04823	0.99833	0.99833	0.99832		0.04823	0.99968	0.99968	0.99969
	0.05208	0.99947	0.99947	0.99947		0.05208	0.99742	0.99742	0.99741		0.05208	0.99946	0.99946	0.99946
	0.05594	0.99921	0.99921	0.99922		0.05594	0.99592	0.99592	0.99592		0.05594	0.99926	0.99926	0.99925
	0.0598	0.99907	0.99907	0.99908		0.0598	0.99457	0.99457	0.99458		0.0598	0.9992	0.9992	0.99919
	0.06366	0.99895	0.99895	0.99895		0.06366	0.99399	0.99399	0.99402		0.06366	0.99909	0.99909	0.99909
	0.06752	0.99877	0.99877	0.99877		0.06752	0.99303	0.99303	0.99306		0.06752	0.9989	0.9989	0.9989
	0.07137	0.99855	0.99855	0.99854		0.07137	0.99204	0.99204	0.99204		0.07137	0.99884	0.99884	0.99884
	0.07523	0.9984	0.9984	0.9984		0.07523	0.99047	0.99047	0.99047		0.07523	0.99879	0.99879	0.9988
	0.07909	0.99826	0.99826	0.99826		0.07909	0.9894	0.9894	0.9894		0.07909	0.99866	0.99866	0.99866
	0.08295	0.99791	0.99791	0.99791		0.08295	0.98804	0.98804	0.98806		0.08295	0.99846	0.99846	0.99846
	0.08681	0.99757	0.99757	0.99757		0.08681	0.98666	0.98666	0.98667		0.08681	0.99835	0.99835	0.99835
	0.09066	0.99725	0.99725	0.99724		0.09066	0.98354	0.98354	0.98354		0.09066	0.99816	0.99816	0.99816
	0.09452	0.997	0.997	0.997		0.09452	0.9787	0.9787	0.9787		0.09452	0.99782	0.99782	0.99782
	0.09838	0.9967	0.9967	0.99669		0.09838	0.97376	0.97376	0.97377		0.09838	0.99728	0.99728	0.99728
	0.10224	0.99646	0.99646	0.99645		0.10224	0.97059	0.97059	0.97062		0.10224	0.99676	0.99676	0.99675
	0.1061	0.9959	0.9959	0.99591		0.1061	0.96568	0.96568	0.96574		0.1061	0.99639	0.99639	0.99638
	0.10995	0.99506	0.99506	0.99507		0.10995	0.95766	0.95766	0.95777		0.10995	0.99591	0.99591	0.99591
	0.11381	0.9941	0.9941	0.9941		0.11381	0.9494	0.9494	0.94953		0.11381	0.9951	0.9951	0.99509
	0.11767	0.99303	0.99303	0.99304		0.11767	0.93848	0.93848	0.93852		0.11767	0.99382	0.99382	0.9938
	0.12153	0.99199	0.99199	0.99199		0.12153	0.9258	0.9258	0.92578		0.12153	0.99272	0.99272	0.9927
	0.12539	0.99108	0.99108	0.99108		0.12539	0.91272	0.91272	0.91262		0.12539	0.99135	0.99135	0.99133
	0.12924	0.9902	0.9902	0.99019		0.12924	0.8997	0.8997	0.89964		0.12924	0.99009	0.99009	0.99006
	0.1331	0.9888	0.9888	0.98879		0.1331	0.88251	0.88251	0.88226		0.1331	0.98815	0.98815	0.98813
	0.13696	0.98724	0.98724	0.98723		0.13696	0.86283	0.86283	0.86243		0.13696	0.98578	0.98578	0.98573
	0.14082	0.98496	0.98496	0.98494		0.14082	0.84046	0.84046	0.84016		0.14082	0.9833	0.9833	0.98322
	0.14468	0.98317	0.98317	0.98316		0.14468	0.82327	0.82327	0.82326		0.14468	0.98177	0.98177	0.98171
	0.14853	0.98216	0.98216	0.98218		0.14853	0.81469	0.81469	0.81557		0.14853	0.98149	0.98149	0.98148
	0.15239	0.98064	0.98064	0.98067		0.15239	0.80568	0.80568	0.80675		0.15239	0.98082	0.98082	0.98089
	0.15625	0.97856	0.97856	0.97858		0.15625	0.78058	0.78058	0.78146		0.15625	0.97903	0.97903	0.97915
	0.16011	0.97557	0.97557	0.97555		0.16011	0.75397	0.75397	0.75449		0.16011	0.97669	0.97669	0.97682
	0.16397	0.97369	0.97369	0.97368		0.16397	0.73541	0.73541	0.73632		0.16397	0.97528	0.97528	0.97542
	0.16782	0.97294	0.97294	0.97295		0.16782	0.72559	0.72559	0.72661		0.16782	0.97438	0.97438	0.97456
	0.17168	0.97376	0.97376	0.97378		0.17168	0.72863	0.72863	0.7297		0.17168	0.97458	0.97458	0.97475
	0.17554	0.97509	0.97509	0.97511		0.17554	0.73659	0.73659	0.73774		0.17554	0.97525	0.97525	0.97539
	0.1794	0.9751	0.9751	0.97513		0.1794	0.74347	0.74347	0.74457		0.1794	0.97568	0.97568	0.97575
	0.18326	0.97502	0.97502	0.97504		0.18326	0.74046	0.74046	0.74189		0.18326	0.97563	0.97563	0.9757
	0.18711	0.97524	0.97524	0.97527		0.18711	0.74274	0.74274	0.74443		0.18711	0.97618	0.97618	0.97623
	0.19097	0.97602	0.97602	0.97603		0.19097	0.75253	0.75253	0.75426		0.19097	0.97671	0.97671	0.97678
	0.19483	0.97565	0.97565	0.97565		0.19483	0.76046	0.76046	0.76296		0.19483	0.97717	0.97717	0.97723
	0.19869	0.97513	0.97513	0.97513		0.19869	0.7622	0.7622	0.76583		0.19869	0.97728	0.97728	0.97731
	0.20255	0.97375	0.97375	0.97376		0.20255	0.75968	0.75968	0.76465		0.20255	0.97751	0.97751	0.97751
	0.2064	0.97294	0.97294	0.97296		0.2064	0.75852	0.75852	0.76356		0.2064	0.97794	0.97794	0.97793
	0.21026	0.97263	0.97263	0.97266		0.21026	0.75426	0.75426	0.75921		0.21026	0.97804	0.97804	0.97807
	0.21412	0.97203	0.97203	0.97204		0.21412	0.75158	0.75158	0.75507		0.21412	0.97773	0.97773	0.9778
	0.21798	0.97213	0.97213	0.97214		0.21798	0.74345	0.74345	0.74595		0.21798	0.97681	0.97681	0.97693
	0.22184	0.97177	0.97177	0.9718		0.22184	0.73637	0.73637	0.74025		0.22184	0.97542	0.97542	0.97558
	0.22569	0.97133	0.97133	0.9714		0.22569	0.72577	0.72577	0.72994		0.22569	0.97458	0.97458	0.97479
	0.22955	0.97052	0.97052	0.97062		0.22955	0.72069	0.72069	0.71346		0.22955	0.97383	0.97383	0.97404
	0.23341	0.96901	0.96901	0.96908		0.23341	0.71192	0.71192	0.6568		0.23341	0.97215	0.97215	0.97229
	0.23727	0.96626	0.96626	0.96629		0.23727	0.69495	0.69495	0.51138		0.23727	0.96901	0.96901	0.96911
	0.24113	0.96244	0.96244	0.96244		0.24113	0.6684	0.54638	0.269		0.24113	0.96443	0.96443	0.96466
	0.24498	0.95922	0.95922	0.95919		0.24498	0.64422	0.58322	0.14636		0.24498	0.95929	0.95929	0.95972
	0.24884	0.95557	0.95557	0.95551		0.24884	0.61377	0.55417	0.13367		0.24884	0.95279	0.95279	0.95337
	0.2527	0.95096	0.95096	0.95087		0.2527	0.57871	0.52051	0.12138		0.2527	0.94568	0.94568	0.94631
	0.25656	0.94729	0.94729	0.94718		0.25656	0.54449	0.49962	0.08968		0.25656	0.93955	0.93955	0.94037
	0.26042	0.94325	0.94325	0.94321		0.26042	0.51332	0.47902	0.06583		0.26042	0.93336	0.93336	0.93457
	0.26427	0.93972	0.93972	0.93983		0.26427	0.47837	0.4497	0.0521		0.26427	0.92633	0.92633	0.9286
	0.26813	0.93432	0.93432	0.93449		0.26813	0.44265	0.42394	0.03248		0.26813	0.91988	0.91988	0.92287
	0.27199	0.92813	0.92813	0.92851		0.27199	0.41159	0.40594	0.00952		0.27199	0.91093	0.91093	0.91457
	0.27585	0.92221	0.92221	0.9231		0.27585	0.39171	0.39519	-0.00575		0.27585	0.90259	0.90259	0.90482
	0.27971	0.91511	0.91511	0.91668		0.27971	0.36609	0.36998	-0.00618		0.27971	0.893	0.893	0.88629
	0.28356	0.90839	0.90839	0.91079		0.28356	0.34039	0.34458	-0.00639		0.28356	0.88144	0.88144	0.84273
	0.28742	0.89819	0.89819	0.90232		0.28742	0.30977	0.31514	-0.00785		0.28742	0.86873	0.86873	0.73077
	0.29128	0.88845	0.88845	0.89363		0.29128	0.27627	0.27501	0.00174		0.29128	0.85564	0.69126	0.53243
	0.29514	0.87811	0.87811	0.8768		0.29514	0.24217	0.2418	0.000487998		0.29514	0.83925	0.72654	0.41215
	0.299	0.86519	0.86519	0.83203		0.299	0.20675	0.20712	-0.000466651		0.299	0.81903	0.71457	0.36596
	0.30285	0.84821	0.84821	0.70217		0.30285	0.17198	0.16551	0.00776		0.30285	0.79926	0.70533	0.31876
	0.30671	0.83168	0.67656	0.47958		0.30671	0.14002	0.13304	0.00805		0.30671	0.77597	0.69377	0.26843
	0.31057	0.81599	0.7122	0.36063		0.31057	0.12592	0.11708	0.01002		0.31057	0.75139	0.67701	0.23028
	0.31443	0.79841	0.70911	0.30699		0.31443	0.10762	0.10704	0.000652886		0.31443	0.7226	0.65276	0.20113
	0.31829	0.77027	0.68146	0.27879		0.31829	0.08788	0.08236	0.00601		0.31829	0.69168	0.62381	0.18042
	0.32215	0.74167	0.64818	0.26573		0.32215	0.0749	0.06715	0.00831		0.32215	0.65657	0.5941	0.1539
	0.326	0.71028	0.61851	0.24055		0.326	0.05655	0.05282	0.00394		0.326	0.61749	0.55965	0.13135
	0.32986	0.67529	0.58659	0.21456		0.32986	0.03798	0.04661	-0.00905		0.32986	0.56674	0.51092	0.11414
	0.33372	0.63728	0.55918	0.17715		0.33372	0.04549	0.05857	-0.01389		0.33372	0.52009	0.46711	0.09944
	0.33758	0.60739	0.53663	0.15271		0.33758	0.04953	0.05368	-0.00439		0.33758	0.48069	0.43071	0.08779
	0.34144	0.57541	0.51008	0.13336		0.34144	0.02501	0.02227	0.00281		0.34144	0.44376	0.39734	0.07702
	0.34529	0.54	0.48007	0.11526		0.34529	0.00823	0.00254	0.00571		0.34529	0.40668	0.3616	0.07062
	0.34915	0.50248	0.45079	0.0941		0.34915	0.01624	0.01346	0.00282		0.34915	0.37191	0.33257	0.05895
	0.35301	0.46479	0.41375	0.08706		0.35301	0.01815	0.01821	-5.602e-05		0.35301	0.33137	0.29458	0.05215
	0.35687	0.42337	0.37121	0.08295		0.35687	0.00974	0.00912	0.000627725		0.35687	0.2875	0.2527	0.04658
	0.36073	0.37438	0.3278	0.06928		0.36073	0.00854	0.01416	-0.0057		0.36073	0.25025	0.21716	0.04228
	0.36458	0.34897	0.30583	0.06215		0.36458	0.01202	0.02776	-0.01619		0.36458	0.2195	0.1919	0.03416
	0.36844	0.33162	0.28755	0.06185		0.36844	0.01746	0.03016	-0.0131		0.36844	0.18743	0.16568	0.02607
	0.3723	0.30511	0.2647	0.05496		0.3723	0.01196	0.01731	-0.00544		0.3723	0.16783	0.15657	0.01335
	0.37616	0.26499	0.23305	0.04164		0.37616	-0.00109	-0.00172	0.000620935		0.37616	0.1501	0.14764	0.00288
	0.38002	0.22552	0.20146	0.03013		0.38002	-0.000293	-0.00531	0.00499		0.38002	0.12787	0.12567	0.00251
	0.38387	0.18776	0.16803	0.02372		0.38387	0.00577	-0.00561	0.01131		0.38387	0.10607	0.1001	0.00664
	0.38773	0.16258	0.14249	0.02344		0.38773	-0.00402	-0.02241	0.01799		0.38773	0.08197	0.07475	0.00781
	0.39159	0.15266	0.13148	0.0244		0.39159	-0.01035	-0.02605	0.01531		0.39159	0.06524	0.06173	0.00374
	0.39545	0.13648	0.12066	0.01799		0.39545	-0.01138	-0.01375	0.00233		0.39545	0.05593	0.05222	0.00392
	0.39931	0.11511	0.10758	0.00844		0.39931	-0.01943	-0.02305	0.00354		0.39931	0.05554	0.05525	0.000299551
	0.40316	0.09657	0.09245	0.00454		0.40316	-0.01542	-0.01958	0.00408		0.40316	0.05557	0.05108	0.00473
	0.40702	0.07731	0.07745	-0.000144165		0.40702	-0.01504	-0.01377	-0.00125		0.40702	0.05112	0.04843	0.00283
	0.41088	0.06175	0.06429	-0.00271		0.41088	-0.01108	-0.0037	-0.00735		0.41088	0.04471	0.04765	-0.00308
	0.41474	0.05731	0.06821	-0.0117		0.41474	-0.00135	0.00658	-0.00798		0.41474	0.04168	0.04778	-0.00641
	0.4186	0.05104	0.05686	-0.00618		0.4186	0.00838	0.01674	-0.00851		0.4186	0.03523	0.03827	-0.00317
	0.42245	0.05309	0.05164	0.00153		0.42245	0.00399	0.01486	-0.01104		0.42245	0.03112	0.02996	0.00119
	0.42631	0.05149	0.0495	0.00209		0.42631	-0.00964	-0.00363	-0.00599		0.42631	0.02225	0.02097	0.00131
	0.43017	0.05063	0.04808	0.00268		0.43017	-0.01408	-0.02377	0.00946		0.43017	0.02307	0.02473	-0.0017
	0.43403	0.04733	0.04255	0.005		0.43403	-0.02215	-0.03896	0.01618		0.43403	0.02183	0.02435	-0.00258
	0.43789	0.03892	0.02862	0.0106		0.43789	-0.02814	-0.04172	0.01304		0.43789	0.02382	0.03578	-0.01241
	0.44174	0.03472	0.02187	0.01314		0.44174	-0.02129	-0.03378	0.01209		0.44174	0.01248	0.02429	-0.0121
	0.4456	0.03242	0.01942	0.01326		0.4456	-0.01097	-0.02386	0.01259		0.4456	0.00675	0.01362	-0.00696
	0.44946	0.03377	0.02064	0.01341		0.44946	0.00767	-0.00114	0.0088		0.44946	0.00371	0.00837	-0.0047
	0.45332	0.01912	0.0108	0.00842		0.45332	0.0127	0.00684	0.00591		0.45332	-0.00507	-0.00764	0.00255
	0.45718	0.00747	0.00652	0.000947179		0.45718	0.0093	0.00677	0.00255		0.45718	-0.00278	-0.01209	0.0092
	0.46103	0.00879	0.00785	0.000946427		0.46103	0.00442	0.00474	-0.000322529		0.46103	-0.00039	-0.0078	0.00735
	0.46489	0.01396	0.00952	0.00448		0.46489	-0.01019	-0.01051	0.000316672		0.46489	0.0047	0.000628	0.00408
	0.46875	0.01235	0.00434	0.00804		0.46875	-0.00716	-0.00267	-0.00448		0.46875	0.00434	0.00202	0.00233
	0.47261	0.00609	-0.00259	0.00865		0.47261	0.00444	0.01492	-0.01064		0.47261	0.00688	0.00358	0.00331
	0.47647	0.00736	6.9e-05	0.00729		0.47647	0.00785	0.01804	-0.01038		0.47647	0.01026	0.00786	0.00242
	0.48032	0.00654	-0.00077	0.0073		0.48032	-0.0034	0.00209	-0.00551		0.48032	0.00623	0.00663	-0.000410725
	0.48418	0.01246	0.00679	0.0057		0.48418	-0.00558	-0.00507	-0.000501456		0.48418	0.00425	0.00416	8.63596e-05
	0.48804	0.02358	0.01535	0.00835		0.48804	-0.00159	-0.00474	0.00313		0.48804	0.00721	-0.00343	0.0106
	0.4919	0.01901	0.01436	0.00471		0.4919	0.00288	0.00252	0.000361911		0.4919	0.00369	-0.01732	0.02065
	0.49576	0.01125	0.00396	0.00732		0.49576	0.000653	0.000635	1.80114e-05		0.49576	-0.00274	-0.01856	0.01553
	0.49961	0.00903	0.00871	0.000318778		0.49961	-0.00778	-0.00684	-0.000941564		0.49961	-0.00159	-0.0093	0.00764
	0.50347	0.00226	0.00327	-0.00101		0.50347	-0.00956	-0.01148	0.0019		0.50347	0.00308	-0.00249	0.00556
	0.50733	-0.00914	-0.0107	0.00154		0.50733	-0.00771	-0.01439	0.00659		0.50733	0.0048	0.00114	0.00367
	0.51119	-0.00674	-0.01039	0.00361		0.51119	-0.000884	-0.00702	0.00609		0.51119	-0.00179	-0.00452	0.00271
	0.51505	-0.00538	-0.00968	0.00426		0.51505	-3.6e-05	-0.00681	0.00673		0.51505	-0.00566	-0.01019	0.00449
	0.5189	-0.0046	-0.00216	-0.00243		0.5189	-0.00342	-0.00955	0.00607		0.5189	-0.01065	-0.01545	0.00472
	0.52276	-0.000239	0.00739	-0.00769		0.52276	-0.0022	-0.0059	0.00369		0.52276	-0.01278	-0.02437	0.01132
	0.52662	0.00518	0.01391	-0.00886		0.52662	-0.000735	-0.000227	-0.000507885		0.52662	-0.01357	-0.02934	0.01532
	0.53048	0.00264	0.01053	-0.00798		0.53048	0.00192	0.00858	-0.00672		0.53048	-0.00857	-0.0313	0.02204
	0.53434	-0.00549	-0.000895	-0.00459		0.53434	0.00806	0.02039	-0.01259		0.53434	-0.00276	-0.01853	0.01549
	0.53819	0.000253	0.00149	-0.00124		0.53819	0.00613	0.017	-0.01106		0.53819	-0.000803	-0.00873	0.00785
	0.54205	0.00135	0.00182	-0.00046284		0.54205	0.00176	0.01203	-0.0104		0.54205	0.000604	0.00291	-0.00231
	0.54591	-0.00143	-0.00212	0.000687546		0.54591	0.000347	0.01045	-0.01021		0.54591	0.00288	0.00728	-0.00443
	0.54977	-0.00226	-0.00778	0.00548		0.54977	0.00219	0.00704	-0.00488		0.54977	0.00411	0.00517	-0.00107
	0.55363	0.000935	-0.01315	0.0139		0.55363	0.00216	0.00467	-0.00252		0.55363	0.00806	0.01007	-0.00203
	0.55748	-0.00319	-0.01624	0.01285		0.55748	0.00302	0.00393	-0.00091158		0.55748	0.00365	0.00557	-0.00194
	0.56134	0.0034	-0.0047	0.00806		0.56134	0.0141	0.01573	-0.00166		0.56134	-0.01133	-0.00638	-0.00492
	0.5652	0.00308	-0.00433	0.00737		0.5652	0.01283	0.01169	0.00115		0.5652	-0.01624	-0.01302	-0.00318
	0.56906	-0.00247	-0.01087	0.0083		0.56906	0.00451	0.00245	0.00206		0.56906	-0.00433	-0.00241	-0.00191
	0.57292	-0.00338	-0.01116	0.0077		0.57292	-0.00478	-0.00498	0.000196025		0.57292	-0.00515	-0.00352	-0.00162
	0.57677	0.00125	-0.0056	0.00681		0.57677	-0.01313	-0.01578	0.00261		0.57677	-0.00955	-0.00851	-0.00103
	0.58063	0.00663	0.000173	0.00646		0.58063	-0.00405	-0.00336	-0.000683702		0.58063	-0.00545	-0.00573	0.000275423
	0.58449	0.0059	-0.00195	0.00783		0.58449	0.00434	0.00791	-0.0036		0.58449	-0.00104	0.00216	-0.00321
	0.58835	0.00563	-0.00162	0.00724		0.58835	-0.00524	-0.00398	-0.00126		0.58835	-0.00602	-0.00533	-0.000685349
	0.59221	0.00473	-0.00402	0.00871		0.59221	-0.00951	-0.00588	-0.00361		0.59221	-0.00798	-0.0143	0.00623
	0.59606	0.0052	0.000924	0.00428		0.59606	-0.01419	-0.00688	-0.00726		0.59606	-0.00597	-0.01088	0.00485
	0.59992	0.01012	0.00718	0.00296		0.59992	-0.01173	0.00236	-0.01412		0.59992	0.000966	-0.0035	0.00445
	0.60378	0.00813	0.00338	0.00476		0.60378	-0.00912	0.00467	-0.01386		0.60378	0.00111	-0.00593	0.007
	0.60764	0.00674	0.00147	0.00528		0.60764	-0.00265	0.01011	-0.01289		0.60764	0.00124	-0.00261	0.00384
	0.6115	0.00726	0.00447	0.0028		0.6115	-0.000239	0.01172	-0.0121		0.6115	0.000716	0.0041	-0.0034
	0.61535	0.00411	0.00219	0.00193		0.61535	0.00217	0.01478	-0.0128		0.61535	-0.00151	0.00827	-0.00987
	0.61921	-0.00467	-0.01161	0.00686		0.61921	0.000297	0.0061	-0.00583		0.61921	-0.0073	0.00414	-0.01149
	0.62307	-0.00731	-0.01744	0.00996		0.62307	-0.00247	-0.00498	0.0025		0.62307	-0.0065	-0.0014	-0.00509
	0.62693	-0.00432	-0.01524	0.01076		0.62693	0.00234	0.00315	-0.000812561		0.62693	0.000786	0.00603	-0.00527
	0.63079	-0.00198	-0.00569	0.00369		0.63079	0.01046	0.00881	0.00167		0.63079	0.00667	0.01491	-0.00837
	0.63465	-0.00695	-0.00769	0.000739315		0.63465	0.00953	0.0012	0.00834		0.63465	0.00458	0.01072	-0.00621
	0.6385	-0.00829	-0.00564	-0.00264		0.6385	0.00189	-0.00559	0.00745		0.6385	0.00498	0.00879	-0.00385
	0.64236	-0.00159	-0.000249	-0.00134		0.64236	-0.01048	-0.00953	-0.000944994		0.64236	0.01271	0.0156	-0.00293
	0.64622	0.00515	0.01416	-0.00913		0.64622	-0.01061	-0.00512	-0.00546		0.64622	0.01369	0.01859	-0.00499
	0.65008	0.00732	0.01898	-0.01188		0.65008	-0.00234	0.000407	-0.00275		0.65008	0.00493	0.00977	-0.00488
	0.65394	0.00841	0.02116	-0.01302		0.65394	0.00465	-0.000529	0.00518		0.65394	-0.00519	0.00179	-0.00699
	0.65779	0.00759	0.01523	-0.00776		0.65779	0.0044	-0.00788	0.01219		0.65779	-0.000534	0.0081	-0.0087
	0.66165	0.00881	0.01016	-0.00136		0.66165	-0.000355	-0.01537	0.01479		0.66165	0.00181	0.01022	-0.0085
	0.66551	0.00555	0.000183	0.00536		0.66551	-0.000332	-0.01018	0.00975		0.66551	-0.000223	0.00811	-0.0084
	0.66937	0.00119	2.4e-05	0.00117		0.66937	0.00344	-0.00591	0.00929		0.66937	0.00169	0.00845	-0.00682
	0.67323	-0.00207	0.0044	-0.0065		0.67323	0.000723	-0.00842	0.00907		0.67323	0.0077	0.01381	-0.00619
	0.67708	-0.00658	0.00608	-0.01274		0.67708	0.00312	-0.00103	0.00414		0.67708	0.00681	0.01273	-0.00599
	0.68094	-0.00723	0.00308	-0.01034		0.68094	0.00758	0.011	-0.00346		0.68094	0.0027	0.00374	-0.00104
	0.6848	-0.00426	0.00303	-0.00731		0.6848	0.00416	0.00523	-0.00108		0.6848	0.00228	-0.00362	0.00588

## Sheet: FigS5H
15 mol% DOPS and 5 mol% cholesterol nanodisc
Resolution (1/A)	Myoferlin (1-1997)-MSP2N2 (map M5: masked)	Myoferlin (1-1997)-MSP2N2 (map M5: corrected)	Myoferlin (1-1997)-MSP2N2 (map M5: phase randomized)	Myoferlin (1-1997)-MSP2N2 (map M6: masked)	Myoferlin (1-1997)-MSP2N2 (map M6: corrected)	Myoferlin (1-1997)-MSP2N2 (map M6: phase randomized)
0.00192901	1	1		1	1
0.00578704	0.999999	0.999999	0.999999	0.999996	0.999996	0.999996
0.00964506	0.999997	0.999997	0.999997	0.999983	0.999983	0.999983
0.0135031	0.999991	0.999991	0.999991	0.999952	0.999952	0.999952
0.0173611	0.999986	0.999986	0.999986	0.999909	0.999909	0.999911
0.0212191	0.99998	0.99998	0.999979	0.999844	0.999844	0.999851
0.0250772	0.999953	0.999953	0.999952	0.999713	0.999713	0.999723
0.0289352	0.99991	0.99991	0.999908	0.999677	0.999677	0.99968
0.0327932	0.999887	0.999887	0.999887	0.999585	0.999585	0.999579
0.0366512	0.999844	0.999844	0.999844	0.999324	0.999324	0.999311
0.0405093	0.999776	0.999776	0.999775	0.99883	0.99883	0.998814
0.0443673	0.999694	0.999694	0.999696	0.998142	0.998142	0.998134
0.0482253	0.999574	0.999574	0.999576	0.997068	0.997068	0.997053
0.0520833	0.999334	0.999334	0.999335	0.995125	0.995125	0.99511
0.0559414	0.999017	0.999017	0.999015	0.992831	0.992831	0.992816
0.0597994	0.998791	0.998791	0.998786	0.991561	0.991561	0.99156
0.0636574	0.998697	0.998697	0.998695	0.991373	0.991373	0.991381
0.0675154	0.998536	0.998536	0.99854	0.990671	0.990671	0.990691
0.0713735	0.99835	0.99835	0.998353	0.990268	0.990268	0.990317
0.0752315	0.998209	0.998209	0.998203	0.989624	0.989624	0.989658
0.0790895	0.998251	0.998251	0.998238	0.988427	0.988427	0.988413
0.0829475	0.998216	0.998216	0.998201	0.986644	0.986644	0.98658
0.0868056	0.998129	0.998129	0.998112	0.984995	0.984995	0.984987
0.0906636	0.997625	0.997625	0.997612	0.981678	0.981678	0.981848
0.0945216	0.997073	0.997073	0.997064	0.977967	0.977967	0.978243
0.0983796	0.996483	0.996483	0.996484	0.974999	0.974999	0.975185
0.102238	0.996231	0.996231	0.99623	0.972906	0.972906	0.973021
0.106096	0.995937	0.995937	0.995946	0.970251	0.970251	0.970228
0.109954	0.995252	0.995252	0.995258	0.963101	0.963101	0.962998
0.113812	0.994071	0.994071	0.994065	0.953529	0.953529	0.953404
0.11767	0.992656	0.992656	0.992645	0.94147	0.94147	0.941373
0.121528	0.991518	0.991518	0.99151	0.928852	0.928852	0.929298
0.125386	0.990468	0.990468	0.990449	0.914021	0.914021	0.915166
0.129244	0.989256	0.989256	0.989243	0.895002	0.895002	0.896711
0.133102	0.987247	0.987247	0.987236	0.876142	0.876142	0.877389
0.13696	0.984307	0.984307	0.98433	0.853001	0.853001	0.853536
0.140818	0.981663	0.981663	0.981725	0.834148	0.834148	0.835371
0.144676	0.98027	0.98027	0.980314	0.818001	0.818001	0.819664
0.148534	0.97912	0.97912	0.979173	0.810244	0.810244	0.811678
0.152392	0.977834	0.977834	0.977911	0.810653	0.810653	0.811656
0.15625	0.975816	0.975816	0.97591	0.803682	0.803682	0.805363
0.160108	0.974695	0.974695	0.974769	0.784195	0.784195	0.78694
0.163966	0.974621	0.974621	0.974683	0.773353	0.773353	0.777382
0.167824	0.974361	0.974361	0.974415	0.767378	0.767378	0.770915
0.171682	0.975304	0.975304	0.975317	0.768102	0.768102	0.770486
0.17554	0.976914	0.976914	0.976947	0.770627	0.770627	0.773111
0.179398	0.977447	0.977447	0.977521	0.77323	0.77323	0.776384
0.183256	0.97706	0.97706	0.977179	0.778348	0.778348	0.782064
0.187114	0.977628	0.977628	0.977772	0.778329	0.778329	0.78291
0.190972	0.978688	0.978688	0.978816	0.781548	0.781548	0.786817
0.19483	0.979741	0.979741	0.979886	0.788158	0.788158	0.793696
0.198688	0.979468	0.979468	0.979658	0.78958	0.78958	0.794518
0.202546	0.979086	0.979086	0.979295	0.786727	0.786727	0.790211
0.206404	0.978739	0.978739	0.978938	0.787722	0.787722	0.789775
0.210262	0.978735	0.978735	0.978892	0.786717	0.786717	0.786625
0.21412	0.978526	0.978526	0.97871	0.78455	0.78455	0.782952
0.217978	0.977804	0.977804	0.978031	0.778419	0.778419	0.775851
0.221836	0.976383	0.976383	0.97664	0.766978	0.766978	0.762521
0.225694	0.975123	0.975123	0.975356	0.755032	0.755032	0.737732
0.229552	0.974203	0.974203	0.974433	0.742826	0.742826	0.679797
0.23341	0.972467	0.972467	0.9727	0.730783	0.730783	0.560584
0.237269	0.969956	0.969956	0.97017	0.714754	0.542323	0.376753
0.241127	0.96578	0.96578	0.965947	0.691936	0.59246	0.244089
0.244985	0.96101	0.96101	0.961299	0.663206	0.595073	0.16826
0.248843	0.955131	0.955131	0.955566	0.621757	0.566274	0.127922
0.252701	0.948194	0.948194	0.948793	0.579258	0.533512	0.0980647
0.256559	0.940912	0.940912	0.941715	0.547894	0.508742	0.0796974
0.260417	0.933295	0.933295	0.93464	0.519096	0.481173	0.0730937
0.264275	0.925318	0.925318	0.927351	0.483587	0.444363	0.0705929
0.268133	0.917665	0.917665	0.920585	0.447896	0.40598	0.0705633
0.271991	0.908894	0.908894	0.91038	0.414475	0.369733	0.070989
0.275849	0.899844	0.899844	0.890915	0.388177	0.345769	0.0648211
0.279707	0.889729	0.889729	0.844338	0.365816	0.329668	0.0539255
0.283565	0.876329	0.876329	0.734443	0.327973	0.301695	0.0376311
0.287423	0.857557	0.687116	0.544742	0.28492	0.257331	0.0371484
0.291281	0.84039	0.729909	0.409051	0.254625	0.227789	0.0347522
0.295139	0.825463	0.72978	0.354093	0.221824	0.203256	0.0233049
0.298997	0.808509	0.718277	0.320286	0.184728	0.176572	0.00990493
0.302855	0.786183	0.698732	0.290276	0.152797	0.147561	0.00614238
0.306713	0.76043	0.674948	0.262979	0.130414	0.127567	0.00326329
0.310571	0.736016	0.652889	0.239482	0.111586	0.108737	0.00319659
0.314429	0.704387	0.630427	0.200123	0.084428	0.065915	0.0198194
0.318287	0.663076	0.593144	0.171884	0.073568	0.042694	0.0322509
0.322145	0.614855	0.543707	0.155926	0.076519	0.044743	0.0332643
0.326003	0.567236	0.496431	0.140606	0.070376	0.045142	0.026427
0.329861	0.513873	0.441	0.130363	0.057868	0.041787	0.0167823
0.333719	0.464491	0.39478	0.115183	0.044122	0.032631	0.0118786
0.337577	0.422485	0.357096	0.101709	0.036853	0.03279	0.00420074
0.341435	0.385633	0.323574	0.0917454	0.031891	0.030396	0.00154187
0.345293	0.345534	0.283188	0.0869768	0.026187	0.033222	-0.00727675
0.349151	0.30697	0.253692	0.0713888	0.0265	0.025164	0.00137049
0.353009	0.254876	0.212402	0.0539285	0.027158	0.01963	0.00767873
0.356867	0.211981	0.181474	0.0372707	0.023855	0.006701	0.0172697
0.360725	0.183471	0.153231	0.0357122	0.02385	0.007306	0.0166658
0.364583	0.176688	0.144808	0.0372782	0.017089	0.010576	0.00658262
0.368441	0.166538	0.134995	0.0364657	0.012171	0.017599	-0.00552524
0.372299	0.134461	0.105711	0.0321484	0.011255	0.02043	-0.00936635
0.376157	0.106839	0.075637	0.0337551	0.012484	0.020236	-0.00791211
0.380015	0.082743	0.055058	0.0292981	0.005086	0.011243	-0.00622701
0.383873	0.066276	0.044806	0.0224771	-0.009809	-0.007203	-0.00258736
0.387731	0.059933	0.041164	0.0195748	-0.004419	-0.006827	0.00239167
0.39159	0.061686	0.044663	0.0178188	-0.009465	-0.006105	-0.00333961
0.395448	0.055562	0.038917	0.017319	-0.013553	-0.004822	-0.0086891
0.399306	0.049838	0.032066	0.0183608	-0.013489	-0.005648	-0.00779696
0.403164	0.037968	0.015709	0.0226142	-0.000826	0.007791	-0.00868466
0.407022	0.032992	0.014488	0.018776	0.011987	0.020817	-0.00901772
0.41088	0.034692	0.021167	0.0138175	0.027822	0.043955	-0.0168747
0.414738	0.027965	0.015807	0.0123533	0.036176	0.051498	-0.0161539
0.418596	0.009722	0.001334	0.0083992	0.032245	0.046071	-0.0144937
0.422454	-0.001417	-0.006925	0.00547012	0.026755	0.032719	-0.00616574
0.426312	0.001792	-0.008879	0.0105771	0.021079	0.022742	-0.0017017
0.43017	0.005911	-0.01009	0.0158412	0.020377	0.025747	-0.00551192
0.434028	0.007851	-0.000601	0.00844692	0.017092	0.028289	-0.011523
0.437886	0.009047	0.009933	-0.000894889	0.01606	0.023814	-0.00794316
0.441744	0.004427	0.001147	0.00328377	0.015398	0.021472	-0.00620728
0.445602	0.001984	-0.006919	0.00884182	0.010724	0.006844	0.00390674
0.44946	0.010417	-0.003773	0.0141367	0.01046	0.001233	0.00923839
0.453318	0.010652	-0.009905	0.0203554	0.009749	0.009182	0.000572254
0.457176	0.000751	-0.022408	0.0226514	0.007584	0.013454	-0.00595005
0.461034	-3.7e-05	-0.018072	0.0177149	0.012776	0.018593	-0.0059272
0.464892	0.007808	-0.00354	0.011308	0.016501	0.021185	-0.00478538
0.46875	0.01034	0.004957	0.00540982	0.004252	0.010052	-0.00585889
0.472608	0.010641	0.009716	0.000934075	-0.005035	-0.00384	-0.00119043
0.476466	0.010402	0.004778	0.005651	-0.010534	-0.016801	0.00616345
0.480324	0.008024	0.000716	0.00731324	-0.00962	-0.014469	0.00477984
0.484182	0.006694	0.000879	0.00582012	-0.003697	0.000509	-0.00420814
0.48804	0.002833	0.000927	0.00190777	0.005218	0.011709	-0.0065679
0.491898	4.8e-05	-0.002217	0.00225999	0.009011	0.01346	-0.0045097
0.495756	0.004603	0.001288	0.00331928	0.001763	0.001832	-6.91266e-05
0.499614	0.011804	0.005403	0.00643577	-0.006998	-0.006524	-0.000470928
0.503472	0.012436	-0.000982	0.0134048	-0.005716	-0.006354	0.000633972
0.50733	0.009644	-0.007933	0.0174387	-0.005368	-0.013003	0.007537
0.511188	0.004659	-0.011213	0.015696	-0.002578	-0.016036	0.0132456
0.515046	0.004529	-0.004413	0.00890271	-0.001691	-0.011277	0.0094791
0.518904	0.008267	0.004845	0.00343866	-0.001593	5.4e-05	-0.00164709
0.522762	0.016863	0.017427	-0.000574003	0.002802	0.013339	-0.0106795
0.52662	0.020981	0.031158	-0.0105043	0.016951	0.027812	-0.0111717
0.530478	0.018679	0.031907	-0.013664	0.01733	0.019343	-0.00205271
0.534336	0.010929	0.021343	-0.0106411	0.015471	0.015979	-0.000516249
0.538194	0.002572	0.011367	-0.00889612	0.009775	0.007151	0.0026429
0.542052	0.005192	0.015769	-0.0107465	-0.001409	-0.008339	0.00687269
0.54591	0.005559	0.018017	-0.0126866	-0.003921	-0.012143	0.00812336
0.549769	0.002925	0.006209	-0.00330452	-0.008583	-0.009877	0.00128134
0.553627	-0.001162	-0.007953	0.00673742	-0.009601	-0.007674	-0.00191233
0.557485	-0.004781	-0.010036	0.00520278	-0.007534	-0.003698	-0.00382187
0.561343	-0.003701	-0.001391	-0.00230679	0.004358	0.006405	-0.0020602
0.565201	0.002618	0.00648	-0.00388719	0.009558	0.009017	0.000545923
0.569059	0.006914	0.009908	-0.00302396	0.011235	0.01034	0.000904351
0.572917	0.006603	0.012735	-0.0062111	0.004699	0.002901	0.00180323
0.576775	0.003397	0.007538	-0.00417245	-0.003302	-0.007056	0.0037277
0.580633	0.000351	-0.00028	0.000630823	0.000395	-0.003916	0.00429418
0.584491	-0.003583	-0.00802	0.0044017	0.0026	0.002463	0.000137338
0.588349	-0.007706	-0.013862	0.00607183	-0.0062	0.001546	-0.00775799
0.592207	-0.004031	-0.010501	0.00640277	-0.015348	-0.002353	-0.0129645
0.596065	0.006061	-0.002125	0.00816864	-0.009995	-9e-05	-0.00990411
0.599923	0.009677	0.00064	0.00904279	-0.001558	0.004998	-0.00658893
0.603781	0.007524	-0.001919	0.00942491	0.002116	0.009022	-0.00696887
0.607639	0.0107	0.006271	0.00445695	0.003277	0.008295	-0.00505997
0.611497	0.010099	0.006934	0.0031871	0.004218	0.003665	0.000555034
0.615355	0.002015	0.003226	-0.00121492	0.003167	0.002966	0.000201598
0.619213	-0.006988	-0.002029	-0.00494896	0.005275	0.00595	-0.00067904
0.623071	-0.010268	-0.002118	-0.00813278	0.002748	0.00438	-0.00163918
0.626929	-0.007312	-0.000239	-0.00707131	-0.003667	-0.001445	-0.00221879
0.630787	1e-05	0.003269	-0.00326969	-0.004608	-0.005834	0.00121889
0.634645	0.004249	0.006926	-0.00269567	0.002537	0.004649	-0.00212187
0.638503	0.000256	0.001295	-0.00104035	0.001444	0.003745	-0.00230965
0.642361	-0.003741	-0.004347	0.000603377	0.003109	0.006096	-0.00300532
0.646219	-0.000105	-0.000684	0.000578604	0.004345	0.004166	0.000179749
0.650077	0.007087	0.010235	-0.00318055	0.004933	0.007442	-0.00252781
0.653935	0.010979	0.017184	-0.00631349	0.009636	0.017047	-0.00753953
0.657793	0.009836	0.010394	-0.000563861	0.007974	0.019262	-0.0115097
0.661651	0.00732	0.005455	0.00187523	0.001169	0.011912	-0.0108725
0.665509	0.006733	0.004039	0.00270492	0.001139	0.007581	-0.00649121
0.669367	0.010771	0.007743	0.00305163	0.007192	0.01064	-0.00348508
0.673225	0.008112	0.006184	0.00194	0.005418	0.007332	-0.00192814
0.677083	0.003108	0.005247	-0.00215028	0.001142	-0.000463	0.00160426
0.680941	0.000921	0.001956	-0.00103703	-0.003304	-0.009356	0.0059959
0.684799	-0.001978	-0.003662	0.00167786	-0.004219	-0.012904	0.00857436

## Sheet: FigS5I
15 mol% DOPS and 2 mol% PI(4,5)P2 nanodisc
Resolution (1/A)	Myoferlin (1-1997)-MSP2N2 (map M7): masked	Myoferlin (1-1997)-MSP2N2 (map M7): corrected	Myoferlin (1-1997)-MSP2N2 (map M7): phase randomized	Myoferlin (1-1997)-MSP2N2 (map M8): masked	Myoferlin (1-1997)-MSP2N2 (map M8): corrected	Myoferlin (1-1997)-MSP2N2 (map M8): phase randomized
0.00192901	1	1		1	1
0.00578704	1	1	1	0.999999	0.999999	0.999999
0.00964506	1	0.999998	0.999998	0.999991	0.999991	0.999992
0.0135031	0.999995	0.999995	0.999995	0.999947	0.999947	0.99995
0.0173611	0.99999	0.99999	0.99999	0.999901	0.999901	0.999903
0.0212191	0.999985	0.999985	0.999985	0.999839	0.999839	0.999839
0.0250772	0.99997	0.99997	0.999969	0.999621	0.999621	0.999625
0.0289352	0.999961	0.999961	0.99996	0.999453	0.999453	0.999474
0.0327932	0.999953	0.999953	0.999953	0.999401	0.999401	0.999438
0.0366512	0.999923	0.999923	0.999922	0.999102	0.999102	0.999148
0.0405093	0.99988	0.99988	0.999881	0.998724	0.998724	0.998763
0.0443673	0.99982	0.99982	0.99982	0.998233	0.998233	0.998241
0.0482253	0.999669	0.999669	0.99967	0.997151	0.997151	0.99713
0.0520833	0.999395	0.999395	0.999397	0.995067	0.995067	0.995037
0.0559414	0.999061	0.999061	0.999063	0.992371	0.992371	0.992412
0.0597994	0.998892	0.998892	0.998892	0.991307	0.991307	0.991449
0.0636574	0.998889	0.998889	0.998888	0.991211	0.991211	0.991333
0.0675154	0.998804	0.998804	0.998799	0.990372	0.990372	0.990467
0.0713735	0.998678	0.998678	0.998674	0.989418	0.989418	0.989554
0.0752315	0.998499	0.998499	0.998503	0.989144	0.989144	0.989189
0.0790895	0.998401	0.998401	0.998405	0.987952	0.987952	0.987965
0.0829475	0.99828	0.99828	0.998289	0.987379	0.987379	0.987423
0.0868056	0.998156	0.998156	0.998166	0.985733	0.985733	0.985787
0.0906636	0.997935	0.997935	0.99794	0.983353	0.983353	0.98343
0.0945216	0.997551	0.997551	0.997547	0.980228	0.980228	0.980243
0.0983796	0.997052	0.997052	0.997048	0.97604	0.97604	0.976149
0.102238	0.997057	0.997057	0.997057	0.97176	0.97176	0.971803
0.106096	0.996675	0.996675	0.996676	0.965427	0.965427	0.965673
0.109954	0.996086	0.996086	0.996071	0.958016	0.958016	0.958414
0.113812	0.995119	0.995119	0.995105	0.948077	0.948077	0.948761
0.11767	0.994129	0.994129	0.994123	0.937151	0.937151	0.93803
0.121528	0.993087	0.993087	0.993098	0.924704	0.924704	0.925529
0.125386	0.991936	0.991936	0.991941	0.908872	0.908872	0.909717
0.129244	0.990804	0.990804	0.990823	0.895195	0.895195	0.895889
0.133102	0.989473	0.989473	0.989481	0.881447	0.881447	0.882368
0.13696	0.987923	0.987923	0.98795	0.868036	0.868036	0.869379
0.140818	0.986197	0.986197	0.986227	0.852931	0.852931	0.854521
0.144676	0.984743	0.984743	0.984752	0.841415	0.841415	0.843406
0.148534	0.98287	0.98287	0.982858	0.830256	0.830256	0.833279
0.152392	0.981634	0.981634	0.98164	0.822977	0.822977	0.826584
0.15625	0.97963	0.97963	0.979661	0.802976	0.802976	0.806929
0.160108	0.976712	0.976712	0.976762	0.778943	0.778943	0.783019
0.163966	0.97612	0.97612	0.976123	0.768891	0.768891	0.773987
0.167824	0.976037	0.976037	0.976037	0.770951	0.770951	0.775534
0.171682	0.976167	0.976167	0.976241	0.777592	0.777592	0.781997
0.17554	0.976739	0.976739	0.976843	0.781743	0.781743	0.787167
0.179398	0.977252	0.977252	0.97736	0.780054	0.780054	0.786859
0.183256	0.977066	0.977066	0.977155	0.773632	0.773632	0.781659
0.187114	0.978137	0.978137	0.978197	0.777128	0.777128	0.784333
0.190972	0.979087	0.979087	0.979149	0.786898	0.786898	0.792604
0.19483	0.979169	0.979169	0.979247	0.791643	0.791643	0.794769
0.198688	0.978443	0.978443	0.978552	0.791002	0.791002	0.79203
0.202546	0.977834	0.977834	0.977928	0.785671	0.785671	0.785144
0.206404	0.977418	0.977418	0.977538	0.77404	0.77404	0.772881
0.210262	0.976796	0.976796	0.976918	0.76807	0.76807	0.766505
0.21412	0.977062	0.977062	0.977139	0.763507	0.763507	0.757067
0.217978	0.976103	0.976103	0.976186	0.756926	0.756926	0.733242
0.221836	0.974946	0.974946	0.975037	0.743791	0.743791	0.669862
0.225694	0.973095	0.973095	0.973199	0.727443	0.727443	0.532674
0.229552	0.971231	0.971231	0.971286	0.713208	0.543119	0.372283
0.23341	0.969064	0.969064	0.969126	0.697653	0.590817	0.261096
0.237269	0.965567	0.965567	0.965708	0.671364	0.605448	0.167065
0.241127	0.961031	0.961031	0.961196	0.633684	0.584756	0.11783
0.244985	0.955549	0.955549	0.955732	0.589642	0.548283	0.0915595
0.248843	0.949491	0.949491	0.949835	0.546895	0.501077	0.0918338
0.252701	0.941677	0.941677	0.942246	0.502972	0.447861	0.0998136
0.256559	0.933093	0.933093	0.934126	0.464478	0.411727	0.089671
0.260417	0.923571	0.923571	0.925648	0.423696	0.37431	0.0789305
0.264275	0.915077	0.915077	0.918119	0.39334	0.349853	0.066888
0.268133	0.904966	0.904966	0.907493	0.355974	0.319349	0.0538088
0.271991	0.894204	0.894204	0.888472	0.32286	0.2899	0.046416
0.275849	0.881581	0.881581	0.843761	0.288889	0.256438	0.0436426
0.279707	0.870096	0.870096	0.740902	0.259811	0.233503	0.0343224
0.283565	0.856014	0.669113	0.564848	0.236054	0.211374	0.0312949
0.287423	0.840848	0.712114	0.44717	0.202645	0.182336	0.0248378
0.291281	0.820385	0.701188	0.398903	0.163045	0.145481	0.0205543
0.295139	0.802428	0.686732	0.36932	0.13786	0.121664	0.0184394
0.298997	0.789737	0.679467	0.344021	0.135807	0.12381	0.0136922
0.302855	0.772864	0.668791	0.314222	0.133494	0.120974	0.014243
0.306713	0.746721	0.65084	0.274605	0.111702	0.095333	0.018094
0.310571	0.715576	0.624646	0.242251	0.093059	0.08063	0.013519
0.314429	0.683915	0.593527	0.222371	0.083448	0.074368	0.00980951
0.318287	0.644278	0.555894	0.199016	0.072892	0.068643	0.00456216
0.322145	0.597993	0.518707	0.164735	0.062598	0.060692	0.00202915
0.326003	0.559665	0.488829	0.138576	0.062926	0.062667	0.000276316
0.329861	0.518836	0.44777	0.128689	0.064447	0.064759	-0.000333604
0.333719	0.468027	0.386572	0.132787	0.05761	0.062334	-0.00503804
0.337577	0.418619	0.334097	0.126928	0.039256	0.043328	-0.00425642
0.341435	0.369955	0.290834	0.111569	0.023145	0.025525	-0.00244234
0.345293	0.328577	0.253713	0.100315	0.021351	0.02936	-0.00825126
0.349151	0.283578	0.208309	0.0950737	0.031967	0.033208	-0.00128363
0.353009	0.251367	0.185991	0.0803136	0.031382	0.021848	0.00974695
0.356867	0.21617	0.15831	0.0687426	0.017948	0.005887	0.0121324
0.360725	0.175275	0.128384	0.0537978	0.011544	0.00034	0.0112078
0.364583	0.141532	0.103801	0.0421011	1.1e-05	-0.014377	0.0141841
0.368441	0.12238	0.090316	0.0352474	-0.009205	-0.013502	0.00423976
0.372299	0.104223	0.082206	0.023989	-0.008707	-0.011953	0.00320766
0.376157	0.092274	0.079676	0.0136887	-0.011781	-0.012464	0.000674592
0.380015	0.091128	0.08489	0.00681667	0.000723	0.006413	-0.00572673
0.383873	0.07695	0.072277	0.00503706	0.021359	0.041276	-0.0207745
0.387731	0.052743	0.045098	0.00800606	0.02378	0.047807	-0.0252333
0.39159	0.037947	0.029204	0.00900601	0.013252	0.034565	-0.0220761
0.395448	0.043763	0.031985	0.0121672	0.005456	0.010075	-0.00466601
0.399306	0.054303	0.040387	0.0145017	-0.004276	-0.000462	-0.00381224
0.403164	0.056347	0.047742	0.00903642	-0.004996	-0.00056	-0.00443352
0.407022	0.047386	0.040935	0.00672634	0.009228	0.011844	-0.00264736
0.41088	0.044655	0.044127	0.000552375	0.013872	0.009838	0.00407408
0.414738	0.031613	0.041603	-0.0104237	0.005453	0.002483	0.00297739
0.418596	0.02321	0.031608	-0.00867211	-0.003151	0.002585	-0.00575087
0.422454	0.012131	0.012596	-0.000470932	-0.001299	0.006203	-0.00754883
0.426312	0.015278	0.0027	0.0126121	-0.004198	-0.008009	0.00378072
0.43017	0.019457	0.01018	0.00937241	-0.012387	-0.02998	0.0170809
0.434028	0.016603	0.014205	0.00243255	-0.011224	-0.040596	0.0282261
0.437886	0.013531	0.016721	-0.00324425	-0.00978	-0.032422	0.021931
0.441744	0.010393	0.022461	-0.0123453	0.00112	-0.010823	0.0118151
0.445602	0.006983	0.02437	-0.0178213	0.006768	-0.001085	0.00784449
0.44946	0.005557	0.022226	-0.0170479	0.001094	-0.004564	0.00563229
0.453318	0.004771	0.016567	-0.0119947	-0.010892	-0.023067	0.0119005
0.457176	0.005184	0.007895	-0.00273257	-0.007824	-0.015524	0.00758229
0.461034	0.008663	0.010372	-0.00172691	0.012757	0.019971	-0.00736101
0.464892	0.008351	0.006908	0.00145304	0.02269	0.040424	-0.0184811
0.46875	-0.003204	0.00066	-0.00386655	0.016331	0.032214	-0.0164117
0.472608	-0.006497	0.000289	-0.00678796	0.014718	0.028393	-0.0140746
0.476466	0.000489	0.004273	-0.00380024	0.01307	0.015733	-0.00270557
0.480324	0.005564	-0.002419	0.00796374	-0.007156	-0.015495	0.00821176
0.484182	-0.002178	-0.020898	0.0183368	-0.018982	-0.033159	0.013722
0.48804	-0.007773	-0.025314	0.0171079	-0.010149	-0.017806	0.00752304
0.491898	-0.007672	-0.017734	0.00988667	-0.008709	-0.008949	0.000237871
0.495756	-0.008762	-0.008793	3.07298e-05	-0.014801	-0.01182	-0.00294618
0.499614	-0.013596	-0.010287	-0.00327531	-0.009634	-0.006868	-0.00274713
0.503472	-0.003294	0.0019	-0.00520389	-0.005571	-0.009315	0.00370945
0.50733	0.012565	0.008105	0.00449644	-0.005241	-0.014609	0.00923311
0.511188	0.011421	-0.0016	0.0130002	-0.003557	-0.010617	0.00698583
0.515046	0.004411	-0.00887	0.0131642	0.001691	0.003161	-0.00147466
0.518904	0.00378	0.001965	0.00181857	0.005939	0.013634	-0.00780136
0.522762	0.0079	0.009379	-0.001493	0.014159	0.02722	-0.0134265
0.52662	0.00955	0.006353	0.00321744	0.015958	0.027186	-0.0115418
0.530478	0.004889	-0.003668	0.00852573	0.013648	0.019002	-0.00545771
0.534336	-0.003899	-0.014107	0.010066	0.007906	0.009988	-0.002103
0.538194	-0.009568	-0.016628	0.00694453	0.003182	0.005544	-0.00237517
0.542052	-0.013635	-0.012167	-0.00145035	0.003591	0.009554	-0.00602052
0.54591	-0.014748	-0.009718	-0.00498159	0.009252	0.015075	-0.00591212
0.549769	-0.007348	-0.001517	-0.00582217	0.012503	0.014964	-0.00249839
0.553627	0.008454	0.015032	-0.00667839	0.013567	0.02001	-0.00657456
0.557485	0.013871	0.023793	-0.0101638	0.012747	0.017769	-0.00511285
0.561343	0.009358	0.020985	-0.0118762	0.007962	0.01359	-0.00570554
0.565201	0.010141	0.02166	-0.011774	0.001195	0.0072	-0.00604855
0.569059	0.0087	0.019373	-0.0108839	0.00944	0.014636	-0.00527318
0.572917	0.004061	0.015812	-0.0119398	0.019848	0.018301	0.00157584
0.576775	0.003631	0.011505	-0.00796565	0.02047	0.011811	0.00876249
0.580633	0.005557	0.012592	-0.00712471	0.018023	0.013626	0.00445774
0.584491	-0.000166	0.003054	-0.00322986	0.009805	0.012725	-0.00295764
0.588349	-0.005563	-0.009889	0.00428364	0.001613	0.00968	-0.00814585
0.592207	-0.005263	-0.018321	0.0128231	-0.004777	0.006511	-0.011362
0.596065	0.005794	-0.011154	0.016761	-0.008532	0.008317	-0.0169903
0.599923	0.009459	-0.002718	0.012144	-0.009551	0.008779	-0.0184923
0.603781	0.007443	-0.005119	0.012498	-0.016998	-0.007584	-0.00934314
0.607639	0.010676	0.002234	0.0084609	-0.018756	-0.018927	0.000167824
0.611497	0.009886	0.002671	0.00723432	-0.009547	-0.011299	0.00173242
0.615355	0.005094	0.000901	0.00419678	-0.002631	0.001908	-0.00454768
0.619213	-0.000959	-0.004088	0.00311626	0.00073	0.007804	-0.00712964
0.623071	-0.00013	-0.00282	0.00268244	0.001759	0.001255	0.000504633
0.626929	-5.6e-05	-0.005176	0.00509364	0.001701	-0.002422	0.00411304
0.630787	-0.004953	-0.009093	0.00410269	0.004454	-0.001423	0.00586865
0.634645	-0.009212	-0.013597	0.00432618	0.004437	-0.000569	0.00500315
0.638503	-0.004837	-0.009331	0.00445245	0.002661	-0.004107	0.00674032
0.642361	-0.003221	-0.00739	0.00413842	0.001442	-0.007023	0.00840596
0.646219	-0.008896	-0.015196	0.0062057	0.002122	-0.005218	0.0073019
0.650077	-0.013877	-0.01273	-0.00113258	0.006308	0.006841	-0.000536671
0.653935	-0.009998	-0.008284	-0.00169992	0.008852	0.01552	-0.00677312
0.657793	-0.004315	-0.002253	-0.00205736	0.003518	0.012571	-0.00916825
0.661651	0.001253	0.001065	0.0001882	0.002966	0.004354	-0.00139407
0.665509	0.00884	0.006891	0.00196252	0.00412	0.000468	0.00365371
0.669367	0.007116	0.007398	-0.000284102	0.005761	0.004996	0.000768841
0.673225	0.005829	0.012541	-0.00679724	0.006368	0.006863	-0.000498421
0.677083	-0.002618	0.006498	-0.00917562	0.002039	0.002731	-0.000693895
0.680941	-0.011272	-0.004247	-0.00699529	-0.000387	0.001224	-0.00161297
0.684799	-0.014962	-0.006152	-0.00875613	-0.004095	-0.005844	0.00173884

## Sheet: FigS7CDE
Dysferlin(1-2017)-Ca2+: map M1 (Fercore)						Dysferlin(1-2017)-Ca2+: map M2 (overall)						Dysferlin(1-2017)-Ca2+: map M3
	Resolution (1/Å)	Masked	Corrected	Phase randomized			Resolution (1/Å)	Masked	Corrected	Phase randomized			Resolution (1/Å)	Masked	Corrected	Phase randomized
	0.00192901	1	1				0.00192901	1	1				0.00165344	1	1
	0.00578704	1	1	1			0.00578704	0.999999	0.999999	0.999999			0.00496032	0.999994	0.999994	0.999994
	0.00964506	0.999999	0.999999	0.999999			0.00964506	0.999996	0.999996	0.999996			0.0082672	0.999971	0.999971	0.99997
	0.0135031	0.999996	0.999996	0.999995			0.0135031	0.999991	0.999991	0.999991			0.0115741	0.999905	0.999905	0.999902
	0.0173611	0.999986	0.999986	0.999986			0.0173611	0.999973	0.999973	0.999973			0.014881	0.999715	0.999715	0.999712
	0.0212191	0.999965	0.999965	0.999964			0.0212191	0.999888	0.999888	0.99989			0.0181878	0.999339	0.999339	0.999346
	0.0250772	0.999958	0.999958	0.999958			0.0250772	0.999789	0.999789	0.999792			0.0214947	0.999148	0.999148	0.999168
	0.0289352	0.999947	0.999947	0.999947			0.0289352	0.99975	0.99975	0.999753			0.0248016	0.999172	0.999172	0.999185
	0.0327932	0.999905	0.999905	0.999908			0.0327932	0.999679	0.999679	0.999682			0.0281085	0.99904	0.99904	0.999037
	0.0366512	0.999818	0.999818	0.999823			0.0366512	0.999513	0.999513	0.999514			0.0314153	0.998562	0.998562	0.998541
	0.0405093	0.999735	0.999735	0.999742			0.0405093	0.999323	0.999323	0.999326			0.0347222	0.997885	0.997885	0.997876
	0.0443673	0.999488	0.999488	0.999496			0.0443673	0.999119	0.999119	0.999123			0.0380291	0.996918	0.996918	0.996931
	0.0482253	0.99891	0.99891	0.998917			0.0482253	0.99863	0.99863	0.998637			0.041336	0.995214	0.995214	0.995266
	0.0520833	0.998034	0.998034	0.998056			0.0520833	0.997147	0.997147	0.997157			0.0446429	0.991112	0.991112	0.991171
	0.0559414	0.996928	0.996928	0.996971			0.0559414	0.993533	0.993533	0.993544			0.0479497	0.982023	0.982023	0.982097
	0.0597994	0.995909	0.995909	0.995956			0.0597994	0.988795	0.988795	0.988804			0.0512566	0.967804	0.967804	0.967844
	0.0636574	0.995186	0.995186	0.995218			0.0636574	0.982929	0.982929	0.982925			0.0545635	0.950102	0.950102	0.950184
	0.0675154	0.994875	0.994875	0.994883			0.0675154	0.9767	0.9767	0.976678			0.0578704	0.925587	0.925587	0.925989
	0.0713735	0.994576	0.994576	0.994566			0.0713735	0.969411	0.969411	0.969349			0.0611772	0.901854	0.901854	0.902617
	0.0752315	0.993825	0.993825	0.993831			0.0752315	0.963915	0.963915	0.963829			0.0644841	0.882166	0.882166	0.883119
	0.0790895	0.992543	0.992543	0.992588			0.0790895	0.957483	0.957483	0.957374			0.067791	0.870729	0.870729	0.87176
	0.0829475	0.991061	0.991061	0.991125			0.0829475	0.953051	0.953051	0.952914			0.0710979	0.870496	0.870496	0.870997
	0.0868056	0.989399	0.989399	0.989453			0.0868056	0.952748	0.952748	0.952648			0.0744048	0.861688	0.861688	0.861676
	0.0906636	0.987188	0.987188	0.987237			0.0906636	0.954691	0.954691	0.954619			0.0777116	0.855764	0.855764	0.855631
	0.0945216	0.986598	0.986598	0.986637			0.0945216	0.954205	0.954205	0.954159			0.0810185	0.862628	0.862628	0.862829
	0.0983796	0.986157	0.986157	0.986158			0.0983796	0.949009	0.949009	0.949004			0.0843254	0.865616	0.865616	0.86619
	0.102238	0.98555	0.98555	0.985535			0.102238	0.940836	0.940836	0.940853			0.0876323	0.85264	0.85264	0.853508
	0.106096	0.983908	0.983908	0.983884			0.106096	0.929399	0.929399	0.929469			0.0909392	0.832017	0.832017	0.832237
	0.109954	0.981941	0.981941	0.981951			0.109954	0.91579	0.91579	0.91581			0.094246	0.798323	0.798323	0.797461
	0.113812	0.979526	0.979526	0.979513			0.113812	0.903536	0.903536	0.90351			0.0975529	0.770697	0.770697	0.769232
	0.11767	0.976204	0.976204	0.976116			0.11767	0.893648	0.893648	0.893577			0.10086	0.755167	0.755167	0.755635
	0.121528	0.970734	0.970734	0.970621			0.121528	0.882145	0.882145	0.882155			0.104167	0.74379	0.74379	0.747795
	0.125386	0.964209	0.964209	0.96418			0.125386	0.865126	0.865126	0.865184			0.107474	0.731023	0.731023	0.736477
	0.129244	0.95643	0.95643	0.95652			0.129244	0.843094	0.843094	0.843186			0.11078	0.70322	0.70322	0.708652
	0.133102	0.94761	0.94761	0.947901			0.133102	0.815864	0.815864	0.81598			0.114087	0.665937	0.665937	0.670444
	0.13696	0.938165	0.938165	0.938648			0.13696	0.790653	0.790653	0.790707			0.117394	0.631581	0.631581	0.634685
	0.140818	0.926635	0.926635	0.927254			0.140818	0.767654	0.767654	0.767554			0.120701	0.604983	0.604983	0.598984
	0.144676	0.918672	0.918672	0.919379			0.144676	0.751637	0.751637	0.751244			0.124008	0.580382	0.580382	0.558525
	0.148534	0.913133	0.913133	0.913717			0.148534	0.730743	0.730743	0.730279			0.127315	0.555475	0.555475	0.501257
	0.152392	0.906872	0.906872	0.907193			0.152392	0.711498	0.711498	0.711061			0.130622	0.522599	0.522599	0.401389
	0.15625	0.900859	0.900859	0.900844			0.15625	0.690921	0.690921	0.690615			0.133929	0.479696	0.479696	0.269619
	0.160108	0.892273	0.892273	0.892061			0.160108	0.668089	0.668089	0.668144			0.137235	0.433746	0.310093	0.179231
	0.163966	0.884669	0.884669	0.884611			0.163966	0.645831	0.645831	0.646263			0.140542	0.36828	0.264688	0.140882
	0.167824	0.879915	0.879915	0.880118			0.167824	0.633394	0.633394	0.633838			0.143849	0.320589	0.226106	0.122088
	0.171682	0.879117	0.879117	0.87965			0.171682	0.621495	0.621495	0.621898			0.147156	0.284016	0.200081	0.104929
	0.17554	0.88249	0.88249	0.883116			0.17554	0.617797	0.617797	0.618384			0.150463	0.254605	0.182913	0.087741
	0.179398	0.88752	0.88752	0.888212			0.179398	0.619029	0.619029	0.619603			0.15377	0.254172	0.200395	0.0672545
	0.183256	0.893616	0.893616	0.894404			0.183256	0.611282	0.611282	0.611846			0.157077	0.243092	0.19016	0.0653611
	0.187114	0.898659	0.898659	0.899386			0.187114	0.595628	0.595628	0.596268			0.160384	0.226372	0.177865	0.0590013
	0.190972	0.905032	0.905032	0.905639			0.190972	0.581278	0.581278	0.583106			0.16369	0.227709	0.198138	0.0368779
	0.19483	0.906042	0.906042	0.906534			0.19483	0.572494	0.572494	0.575029			0.166997	0.236477	0.231318	0.00671149
	0.198688	0.906886	0.906886	0.907255			0.198688	0.574151	0.574151	0.577693			0.170304	0.213292	0.21756	-0.00545473
	0.202546	0.905637	0.905637	0.90599			0.202546	0.580355	0.580355	0.584492			0.173611	0.183635	0.200248	-0.0207727
	0.206404	0.906192	0.906192	0.906427			0.206404	0.597695	0.597695	0.60144			0.176918	0.160835	0.189662	-0.035574
	0.210262	0.905706	0.905706	0.906046			0.210262	0.613396	0.613396	0.615041			0.180225	0.15942	0.188596	-0.0359574
	0.21412	0.904865	0.904865	0.905613			0.21412	0.626069	0.626069	0.626861			0.183532	0.171303	0.176997	-0.00691856
	0.217978	0.901934	0.901934	0.90334			0.217978	0.63857	0.63857	0.640682			0.186839	0.169218	0.168467	0.000903151
	0.221836	0.896882	0.896882	0.89901			0.221836	0.650573	0.650573	0.654841			0.190146	0.179103	0.16705	0.0144703
	0.225694	0.892153	0.892153	0.894874			0.225694	0.655821	0.655821	0.663156			0.193452	0.212804	0.193059	0.024469
	0.229552	0.884939	0.884939	0.887928			0.229552	0.658916	0.658916	0.668504			0.196759	0.208928	0.185053	0.0292964
	0.23341	0.877039	0.877039	0.880504			0.23341	0.659789	0.659789	0.672337			0.200066	0.173267	0.167572	0.00684143
	0.237269	0.865932	0.865932	0.87044			0.237269	0.666515	0.666515	0.680395			0.203373	0.164417	0.178024	-0.016554
	0.241127	0.851122	0.851122	0.857784			0.241127	0.669386	0.669386	0.681711			0.20668	0.154154	0.162366	-0.00980381
	0.244985	0.828566	0.828566	0.836298			0.244985	0.671774	0.671774	0.677788			0.209987	0.145927	0.149869	-0.00463693
	0.248843	0.80471	0.80471	0.806625			0.248843	0.667601	0.667601	0.657516			0.213294	0.130552	0.129213	0.00153769
	0.252701	0.781974	0.781974	0.754671			0.252701	0.664109	0.664109	0.612922			0.216601	0.114777	0.103645	0.0124192
	0.256559	0.762224	0.762224	0.654859			0.256559	0.660225	0.660225	0.504043			0.219907	0.095347	0.080992	0.0156201
	0.260417	0.743742	0.503809	0.48355			0.260417	0.656467	0.517123	0.28857			0.223214	0.096426	0.091022	0.00594514
	0.264275	0.726825	0.598611	0.319426			0.264275	0.650487	0.592882	0.141495			0.226521	0.119563	0.110027	0.0107149
	0.268133	0.707085	0.6119	0.245259			0.268133	0.641655	0.567321	0.171799			0.229828	0.129128	0.114326	0.0167127
	0.271991	0.680986	0.608128	0.185923			0.271991	0.629637	0.560237	0.157812			0.233135	0.099566	0.090773	0.00967085
	0.275849	0.645713	0.583731	0.148899			0.275849	0.605652	0.559872	0.104015			0.236442	0.080253	0.084469	-0.00460498
	0.279707	0.607982	0.54789	0.132915			0.279707	0.576077	0.540903	0.0766156			0.239749	0.073918	0.075806	-0.00204286
	0.283565	0.570301	0.509541	0.123884			0.283565	0.546578	0.517334	0.0605885			0.243056	0.068241	0.057254	0.0116543
	0.287423	0.52997	0.479804	0.0964367			0.287423	0.502567	0.478554	0.0460508			0.246362	0.057064	0.045399	0.0122198
	0.291281	0.500904	0.465417	0.0663826			0.291281	0.460252	0.441963	0.0327738			0.249669	0.028036	0.025578	0.00252252
	0.295139	0.473579	0.452408	0.038662			0.295139	0.419106	0.403595	0.0260075			0.252976	0.025691	0.037216	-0.0119705
	0.298997	0.445858	0.424476	0.0371522			0.298997	0.391182	0.382961	0.0133233			0.256283	0.037052	0.063982	-0.0287708
	0.302855	0.425916	0.405725	0.0339759			0.302855	0.370395	0.372987	-0.00413389			0.25959	0.017708	0.043307	-0.0267578
	0.306713	0.397306	0.375811	0.0344367			0.306713	0.348883	0.355843	-0.0108048			0.262897	0.006646	0.026044	-0.0199167
	0.310571	0.37287	0.355111	0.0275381			0.310571	0.32819	0.328447	-0.000382695			0.266204	0.016797	0.026659	-0.0101321
	0.314429	0.348102	0.323877	0.0358293			0.314429	0.310002	0.298188	0.0168336			0.269511	0.025886	0.018492	0.00753331
	0.318287	0.324404	0.2957	0.0407554			0.318287	0.296265	0.285155	0.0155418			0.272817	0.016787	-0.000898	0.0176691
	0.322145	0.281564	0.259445	0.0298681			0.322145	0.264067	0.259297	0.00643983			0.276124	-0.001127	-0.018905	0.0174481
	0.326003	0.225844	0.217772	0.0103192			0.326003	0.22466	0.225616	-0.00123453			0.279431	-0.012352	-0.01995	0.00744939
	0.329861	0.177269	0.181657	-0.00536205			0.329861	0.188099	0.190407	-0.00285082			0.282738	-0.011298	-0.015062	0.00370815
	0.333719	0.154559	0.168501	-0.0167673			0.333719	0.15382	0.155166	-0.00159321			0.286045	-0.011668	-0.005461	-0.00617329
	0.337577	0.128471	0.150888	-0.0264005			0.337577	0.127996	0.129725	-0.00198673			0.289352	-0.006717	0.004778	-0.0115502
	0.341435	0.113892	0.145993	-0.0375887			0.341435	0.103495	0.109427	-0.00666088			0.292659	0.006506	0.011981	-0.00554139
	0.345293	0.101032	0.135281	-0.0396071			0.345293	0.084066	0.086594	-0.00276766			0.295966	0.018321	0.013683	0.00470234
	0.349151	0.089113	0.112491	-0.0263411			0.349151	0.072031	0.071165	0.000932351			0.299272	0.014353	0.000787	0.0135767
	0.353009	0.059825	0.076758	-0.0183408			0.353009	0.065326	0.061252	0.00433982			0.302579	0.014074	-0.000155	0.0142268
	0.356867	0.032876	0.047572	-0.01543			0.356867	0.05991	0.06792	-0.00859368			0.305886	0.021771	0.008754	0.013132
	0.360725	0.013114	0.018675	-0.00566683			0.360725	0.063054	0.080408	-0.0188714			0.309193	0.026986	0.022543	0.00454547
	0.364583	0.012154	0.010543	0.00162817			0.364583	0.069225	0.085426	-0.0177143			0.3125	0.01908	0.017632	0.00147399
	0.368441	0.013508	0.014649	-0.00115796			0.368441	0.063147	0.066432	-0.00351876			0.315807	0.015617	0.016704	-0.00110547
	0.372299	0.009772	0.016331	-0.00666789			0.372299	0.0502	0.044265	0.00620988			0.319114	0.028793	0.033394	-0.00475995
	0.376157	0.006081	0.013298	-0.00731427			0.376157	0.038687	0.035208	0.00360596			0.322421	0.036747	0.051998	-0.0160875
	0.380015	0.002294	0.002626	-0.000332874			0.380015	0.032289	0.03461	-0.00240421			0.325728	0.025365	0.041751	-0.0170999
	0.383873	0.003968	-0.000123	0.0040905			0.383873	0.034078	0.045056	-0.011496			0.329034	0.006689	0.012997	-0.00639106
	0.387731	0.00598	-0.005836	0.0117474			0.387731	0.037073	0.048913	-0.0124489			0.332341	-0.003519	-0.00545	0.00192053
	0.39159	-0.002632	-0.018564	0.0156416			0.39159	0.033378	0.046386	-0.0136407			0.335648	-0.002931	-0.014652	0.0115517
	0.395448	-0.007127	-0.02743	0.019761			0.395448	0.027411	0.03922	-0.0122911			0.338955	0.002367	-0.015246	0.0173485
	0.399306	-0.004099	-0.017772	0.0134342			0.399306	0.015003	0.025592	-0.0108671			0.342262	0.012772	0.00228	0.010516
	0.403164	0.003503	0.00285	0.000654866			0.403164	0.005999	0.010945	-0.00500073			0.345569	0.013744	0.012664	0.00109385
	0.407022	0.009376	0.015561	-0.00628277			0.407022	-0.002942	0.00191	-0.00486129			0.348876	0.00301	0.005279	-0.00228104
	0.41088	0.009811	0.027674	-0.0183714			0.41088	-0.001709	-0.004795	0.00307127			0.352183	-0.001892	-0.002104	0.000211555
	0.414738	0.005322	0.029119	-0.0245107			0.414738	-0.002691	-0.009434	0.00667998			0.355489	0.001168	0.001599	-0.00043169
	0.418596	0.000566	0.024182	-0.0242012			0.418596	0.003434	-0.005242	0.00863076			0.358796	-0.000378	0.003293	-0.00368313
	0.422454	-0.004207	0.015298	-0.019808			0.422454	0.003908	-0.008314	0.0121212			0.362103	-0.010842	0.001387	-0.012246
	0.426312	-0.002708	0.010837	-0.0136934			0.426312	-9.9e-05	-0.012595	0.0123406			0.36541	-0.021631	-0.008081	-0.0134414
	0.43017	0.005523	0.014516	-0.00912547			0.43017	-0.006326	-0.0198	0.0132124			0.368717	-0.019467	-0.008931	-0.0104427
	0.434028	0.006846	0.012951	-0.0061851			0.434028	-0.006738	-0.009811	0.00304314			0.372024	-0.012523	0.002184	-0.0147392
	0.437886	0.0092	0.008293	0.000914585			0.437886	-0.004037	0.000466	-0.0045051			0.375331	-0.013305	0.002062	-0.0153988
	0.441744	0.013693	0.004288	0.0094455			0.441744	-0.00053	0.003031	-0.00357183			0.378638	-0.009654	-0.000751	-0.00889632
	0.445602	0.017539	0.002286	0.0152879			0.445602	0.001893	-0.013254	0.0149489			0.381944	-0.007629	-0.010325	0.00266845
	0.44946	0.021647	0.00183	0.0198533			0.44946	0.004621	-0.019797	0.023944			0.385251	0.000275	-0.009498	0.00968105
	0.453318	0.022955	0.006915	0.0161517			0.453318	0.014645	-0.006076	0.0205959			0.388558	0.002645	-0.01353	0.0159591
	0.457176	0.022318	0.006944	0.0154815			0.457176	0.021712	0.017613	0.00417249			0.391865	0.004726	-0.010302	0.0148748
	0.461034	0.016724	0.002711	0.0140511			0.461034	0.021569	0.025435	-0.0039669			0.395172	0.009052	-0.005896	0.0148604
	0.464892	0.021018	0.004203	0.016886			0.464892	0.022265	0.025672	-0.00349677			0.398479	0.001869	-0.010282	0.0120273
	0.46875	0.025834	0.010235	0.0157603			0.46875	0.018616	0.014225	0.00445436			0.401786	0.000638	0.000334	0.000304102
	0.472608	0.032165	0.017032	0.0153952			0.472608	0.014667	0.009074	0.00564422			0.405093	-0.001124	0.001986	-0.00311619
	0.476466	0.033923	0.019218	0.0149931			0.476466	0.005851	0.006472	-0.000625045			0.408399	-0.003777	-0.000614	-0.00316106
	0.480324	0.032208	0.011285	0.0211618			0.480324	-0.004232	0.003564	-0.00782388			0.411706	0.004616	0.010057	-0.00549628
	0.484182	0.025644	0.006799	0.018974			0.484182	-0.004994	0.008094	-0.0131948			0.415013	0.022739	0.025258	-0.00258427
	0.48804	0.018627	-0.002395	0.0209718			0.48804	0.001962	0.014382	-0.0126012			0.41832	0.025555	0.024383	0.00120129
	0.491898	0.016606	-0.001746	0.01832			0.491898	0.01153	0.022817	-0.0115505			0.421627	0.021521	0.015077	0.00654264
	0.495756	0.017992	0.001891	0.0161315			0.495756	0.009895	0.015808	-0.00600797			0.424934	0.003843	-0.002826	0.00665021
	0.499614	0.02106	0.005154	0.0159884			0.499614	0.004482	0.008554	-0.00410713			0.428241	-0.01273	-0.017437	0.00462633
	0.503472	0.016011	0.006834	0.00924015			0.503472	-0.007254	-0.00075	-0.00649913			0.431548	-0.007603	-0.009258	0.00163982
	0.50733	0.004944	0.000608	0.00433864			0.50733	-0.013345	-0.000559	-0.0127789			0.434854	0.002103	0.000622	0.00148192
	0.511188	-0.006635	-0.011167	0.00448195			0.511188	-0.005652	0.011674	-0.0175307			0.438161	0.012388	0.009206	0.00321157
	0.515046	-0.017116	-0.02437	0.00708143			0.515046	0.004641	0.020617	-0.0163123			0.441468	0.009993	0.01298	-0.00302628
	0.518904	-0.016874	-0.032037	0.0146923			0.518904	0.00689	0.015451	-0.00869535			0.444775	0.005796	0.01807	-0.0124999
	0.522762	-0.006608	-0.024058	0.0170401			0.522762	-0.002308	-0.000752	-0.00155483			0.448082	0.005198	0.017669	-0.0126953
	0.52662	-0.005392	-0.027704	0.0217105			0.52662	-0.008244	-0.011604	0.00332146			0.451389	0.005068	0.016326	-0.0114448
	0.530478	-0.005057	-0.025251	0.0196966			0.530478	-0.00202	-0.005213	0.00317644			0.454696	0.013078	0.024796	-0.0120159
	0.534336	-0.00769	-0.025325	0.0171994			0.534336	0.012192	0.013958	-0.001791			0.458003	0.023267	0.0297	-0.00662991
	0.538194	-0.008901	-0.021141	0.0119866			0.538194	0.021198	0.028369	-0.00738037			0.46131	0.029038	0.034011	-0.00514809
	0.542052	-0.005087	-0.011543	0.00638233			0.542052	0.02106	0.03184	-0.0111345			0.464616	0.024136	0.025934	-0.00184587
	0.54591	0.004511	-0.00591	0.0103598			0.54591	0.00895	0.018587	-0.00981952			0.467923	0.010614	0.013237	-0.00265819
	0.549769	0.014115	0.000539	0.0135833			0.549769	-0.001208	0.002713	-0.00393167			0.47123	-0.002304	0.000279	-0.00258372
	0.553627	0.018358	0.00428	0.0141385			0.553627	-0.006037	-0.003302	-0.002726			0.474537	-0.006896	-0.003075	-0.00380929
	0.557485	0.019212	0.010039	0.00926602			0.557485	-0.000751	0.00481	-0.00558788			0.477844	-0.011531	-0.003567	-0.00793569
	0.561343	0.020521	0.014552	0.00605714			0.561343	0.009997	0.018408	-0.00856873			0.481151	-0.009721	0.001873	-0.0116158
	0.565201	0.015306	0.005398	0.00996177			0.565201	0.017411	0.029466	-0.012421			0.484458	0.003641	0.013187	-0.00967357
	0.569059	0.01078	-0.006104	0.0167816			0.569059	0.016155	0.031653	-0.0160046			0.487765	0.011862	0.017084	-0.00531276
	0.572917	0.007634	-0.010503	0.0179485			0.572917	0.007411	0.018818	-0.0116258			0.491071	0.005529	0.009814	-0.00432747
	0.576775	0.010242	-0.001741	0.0119622			0.576775	-0.002981	0.001928	-0.00491848			0.494378	-0.002038	-0.000454	-0.00158328
	0.580633	0.01665	0.015332	0.00133852			0.580633	0.00022	-0.006387	0.00656507			0.497685	-0.00347	-0.005336	0.0018561
	0.584491	0.018489	0.021582	-0.00316123			0.584491	0.003594	-0.007169	0.0106864			0.500992	-0.012305	-0.017207	0.00481908
	0.588349	0.020377	0.020646	-0.000274671			0.588349	0.005127	-0.008327	0.0133429			0.504299	-0.015901	-0.019114	0.00315274
	0.592207	0.019057	0.016149	0.00295573			0.592207	0.000617	-0.009821	0.0103365			0.507606	-0.00977	-0.009591	-0.0001773
	0.596065	0.012741	0.007305	0.005476			0.596065	-0.00837	-0.014026	0.00557777			0.510913	-0.018029	-0.022864	0.00472692
	0.599923	0.007303	0.00033	0.0069753			0.599923	-0.010787	-0.01494	0.00409187			0.51422	-0.018286	-0.025558	0.00709077
	0.603781	0.001567	-0.00383	0.00537641			0.603781	-0.012635	-0.01305	0.000409654			0.517526	-0.010284	-0.016834	0.00644156
	0.607639	-0.000394	0.001884	-0.0022823			0.607639	-0.002857	-0.003941	0.00107974			0.520833	-0.003692	-0.007849	0.00412463
	0.611497	0.00012	0.011036	-0.0110378			0.611497	0.000484	0.003215	-0.00273981			0.52414	-0.005825	-0.009015	0.0031615
	0.615355	0.007228	0.02177	-0.0148656			0.615355	0.003054	0.009143	-0.00614519			0.527447	-0.007421	-0.00897	0.00153523
	0.619213	0.014289	0.024233	-0.010191			0.619213	0.008803	0.017633	-0.00898849			0.530754	-0.000617	-0.000998	0.00038062
	0.623071	0.018327	0.018729	-0.000409673			0.623071	0.019991	0.029955	-0.0102717			0.534061	0.007518	0.00957	-0.00207183
	0.626929	0.016376	0.008514	0.00792951			0.626929	0.030546	0.037895	-0.00763846			0.537368	-8.9e-05	0.001143	-0.00123341
	0.630787	0.014257	0.0099	0.00440057			0.630787	0.032771	0.03961	-0.00712107			0.540675	-0.003876	-3.2e-05	-0.00384388
	0.634645	0.013098	0.012071	0.00103955			0.634645	0.026015	0.031784	-0.00595838			0.543981	0.004928	0.01222	-0.00738221
	0.638503	0.011845	0.013568	-0.0017467			0.638503	0.016346	0.020054	-0.00378388			0.547288	0.011984	0.020825	-0.00902903
	0.642361	0.007082	0.004103	0.00299127			0.642361	0.01235	0.014909	-0.00259773			0.550595	0.01712	0.026976	-0.0101292
	0.646219	0.00147	-0.007523	0.00892585			0.646219	0.010358	0.012015	-0.00167715			0.553902	0.025258	0.032494	-0.00747902
	0.650077	-0.006013	-0.014909	0.00876532			0.650077	0.008504	0.006098	0.00242076			0.557209	0.029852	0.033171	-0.00343287
	0.653935	-0.007563	-0.015674	0.00798583			0.653935	0.013465	0.010649	0.00284631			0.560516	0.015911	0.01518	0.000742268
	0.657793	-0.009658	-0.013674	0.00396183			0.657793	0.021868	0.01431	0.00766773			0.563823	0.002097	-0.001973	0.00406199
	0.661651	-0.007785	-0.012064	0.00422799			0.661651	0.023738	0.017002	0.00685251			0.56713	-0.000219	-0.000497	0.000277862
	0.665509	-0.004592	-0.009323	0.0046873			0.665509	0.007344	0.002947	0.00441			0.570437	0.005349	0.01222	-0.006956
	0.669367	-0.005075	-0.007438	0.00234555			0.669367	-0.008114	-0.006994	-0.00111222			0.573743	0.005222	0.01242	-0.00728852
	0.673225	-0.009057	-0.008782	-0.000272606			0.673225	-0.00638	-0.003961	-0.00240946			0.57705	0.004711	0.009159	-0.00448912
	0.677083	-0.014851	-0.012372	-0.0024487			0.677083	0.001959	0.001309	0.000650852			0.580357	0.010207	0.011756	-0.00156743
	0.680941	-0.020256	-0.022456	0.00215168			0.680941	0.002013	-0.000654	0.00266526			0.583664	0.013136	0.011114	0.00204472
	0.684799	-0.019908	-0.023356	0.00336931			0.684799	-0.006549	-0.009193	0.00261992			0.586971	0.007295	0.000575	0.00672387
							0.688657	-0.008427	-0.010103	0.00165924			0.590278	0.006534	0.005817	0.000721195
							0.692515	-0.001389	0.002254	-0.00365123			0.593585	0.006801	0.013095	-0.00637751
							0.696373	0.004131	0.012877	-0.00886009			0.596892	0.002667	0.012509	-0.00996667
							0.700231	0.002862	0.012715	-0.00997989			0.600198	0.005751	0.018835	-0.0133352
							0.70409	0.001202	0.002774	-0.00157637			0.603505	0.010323	0.025474	-0.015547
							0.707948	0.006397	-0.004754	0.0110982			0.606812	0.005996	0.019015	-0.0132714
							0.711806	0.009093	-0.008944	0.0178771			0.610119	0.005726	0.006652	-0.000932201
							0.715664	0.00503	-0.011916	0.0167464			0.613426	0.009454	0.000794	0.00866688
							0.719522	-0.000171	-0.012183	0.0118674			0.616733	0.00737	-0.002616	0.00995994
							0.72338	-0.00165	-0.011801	0.0100326			0.62004	0.0099	0.000182	0.00971977
							0.727238	0.004492	-0.008332	0.012718			0.623347	0.015079	0.00804	0.00709605
							0.731096	0.00314	-0.008775	0.0118114			0.626653	0.010647	0.009285	0.00137477
							0.734954	-0.000382	-0.009527	0.0090587			0.62996	0.008504	0.007051	0.00146332
							0.738812	0.004728	0.005285	-0.000559959			0.633267	0.006353	0.002459	0.0039036
							0.74267	0.015987	0.023335	-0.00752356			0.636574	0.006151	0.003801	0.00235897
							0.746528	0.019985	0.030284	-0.0106206			0.639881	0.010281	0.009469	0.000819762
							0.750386	0.010753	0.020692	-0.010149			0.643188	0.00883	0.01123	-0.00242726
							0.754244	0.000243	0.001949	-0.00170933			0.646495	0.010593	0.01676	-0.00627212
							0.758102	-0.002736	-0.00531	0.0025604			0.649802	0.005551	0.014709	-0.00929472
							0.76196	-0.000309	-0.004791	0.00446063			0.653108	0.003876	0.012344	-0.00857384
							0.765818	0.001028	-0.000849	0.00187541			0.656415	0.009638	0.018785	-0.00932212
							0.769676	-0.000156	0.004871	-0.00505161			0.659722	0.00823	0.014231	-0.00608763
							0.773534	-0.005299	-0.000904	-0.00439103			0.663029	0.005937	0.010117	-0.00422272
							0.777392	-0.008763	-0.004028	-0.004716			0.666336	-0.000884	0.004007	-0.00491068
							0.78125	-0.008683	-0.008961	0.000275531			0.669643	-0.002524	-0.000442	-0.00208108
							0.785108	-0.005968	-0.006016	4.7713e-05			0.67295	-0.00022	-0.003068	0.00283929
							0.788966	-0.002022	0.000626	-0.00264966			0.676257	0.001414	-0.000621	0.00203374
							0.792824	-5.2e-05	0.007967	-0.0080834			0.679563	0.009306	0.007703	0.00161544
							0.796682	-0.001362	0.011627	-0.0131418			0.68287	0.012072	0.013903	-0.00185681
							0.80054	-0.003743	0.007188	-0.0110101			0.686177	0.008271	0.013092	-0.00488495

## Sheet: FigS12D
Dysferlin Fer core (residues 214-1281)
[Me2+] mM	D417A/D465A/D473A/D1168A/D1174A/D1230A/D1232A: Ca2+							D417A/D465A/D473A/D1168A/D1174A/D1230A/D1232A: Mg2+					wild-type: Ca2+						D1168A/D1174A/D1230A/D1232A: Ca2+
	TmoC	TmoC	TmoC					TmoC					TmoC	TmoC	TmoC	TmoC	TmoC		TmoC	TmoC	TmoC
	Repeat 1	Repeat 2	Repeat 3					Repeat 1					Repeat 1	Repeat 2	Repeat 3	Repeat 4	Repeat 5		Repeat 1	Repeat 2	Repeat 3
0	40.2	41.4	41.4					41.6					42.8	42.9	43.03	42.95	43.4		42.54	40.79	40.5
80		44.9	45.3					43.8
40	44.8	45.9	45.6					44.3					74.73	72.73	71.47	73.46	71.88		67.99	69.12	68.58
20	45	45.1	45.4					43.8					74.01	71.45	70.09	72.82	70.91		68.41	69.16	68.37
10	43.4	44.8	44					43.2					71.15	69.27	69.67	70.8	69.82		68.13	68.47	68.63
5	42.3	43	43					42.1					68.49	67.72	66.97	68.3	68.01		66.93	65.82	66.59
2.5	41.5	42.2	42.1					41.9					65.4	64.51	64.44	65.38	65.55		64.45	63.21	62.79
1.25	40.9	42.1	41.5					41.5					62.62	61.77	61.49	62.8	62.51		61.24	59.05	58.4
0.625	40.8	42.1	41.7					41.7					60.29	58.64	58.62	59.35	59.41		57.48	54.99	54.34
0.313	40.7	42.2	41.4					41.3					57.37	55.68	56.13	56.71	56.38		54.53	51.43	50.23
0.156	40.7	41.7	41.2					40.9					54.82	52.66	52.76	53.88	53.35		50.73	48.86	46.82
0.078	40.7	41.8	41.2					41.6					51.49	49.15	49.71	49.96	50.39		47.52	45.46	45.09
0.039	40.4	41.2	41.2					41.4					48.64	46.56	46.89	46.88	47.96		45.2	44.44	43.8
0.02	40.3	41.5	41.1					41.1						44.07	43.99	45.77	44.85		43.49	42.59	42.44
0.01		41.7	41.4

[truncated: 8 more sheets: FigS13B, FigS13C, FigS14A, FigS14C, FigEV2G, FigEV3G, FigEV4D, FigEV4E]
